# Supplementary material for: Enantioselective intermolecular all-carbon [4+2] annulation via N-heterocyclic carbene organocatalysis
Source: Royal Society of Chemistry journal article supplement (doi:10.1039/c7cc08680f), 2017-01-01
Supplement: c7cc08680f1.pdf [file c7cc08680f1.pdf]

Supporting Information  
**Enantioselective Intermolecular All-Carbon [4+2] Annulation via N-Heterocyclic  
Carbene Organocatalysis**

Guoxiang Zhang, Weici Xu, Jian Liu, Deb Kumar Das, Shuang Yang, Saima Perveen, Hao Zhang,  
Xinglong Li, and Xinqiang Fang\*

State Key Laboratory of Structural Chemistry and Key Laboratory of Coal to Ethylene  
Glycol and Its Related Technology, Fujian Institute of Research on the Structure of  
Matter, University of Chinese Academy of Sciences, Fuzhou, 350100, China.

\*xqfang@fjirsm.ac.cn

**Table of Contents**

|            |                                                                               |     |
|------------|-------------------------------------------------------------------------------|-----|
| <b>I</b>   | general information                                                           | S1  |
| <b>II</b>  | optimization of reaction conditions                                           | S2  |
| <b>III</b> | single-crystal X-ray crystallographic analysis                                | S5  |
| <b>IV</b>  | 1. general procedures for the preparation of substrates                       | S7  |
|            | 2. general procedures for the [4+2] annulations                               | S14 |
|            | 3. procedures for the product derivatizations                                 | S15 |
| <b>V</b>   | characterizations of new compounds                                            | S18 |
| <b>VI</b>  | <sup>1</sup> H NMR and <sup>13</sup> C NMR spectra of substrates and products | S46 |
| <b>VII</b> | HPLC spectra for ee determination                                             | S98 |

**I. General Information.**

Commercially available materials purchased from Aladdin, Beijing Ouhe, Meryer, BidePharmaTech, and Adamas were used as received, unless otherwise noted, all reactions and manipulations involving air- or moisture-sensitive compounds were performed using standard Schlenk technique. All solvents were purified and dried using standard procedures. <sup>1</sup>H NMR spectra were recorded on a Bruker AVANCE III HD400 (400 MHz) spectrometer. Chemical shifts were recorded in parts per million (ppm,  $\delta$ ) relative to tetramethylsilane ( $\delta$  = 0.00 ppm) or chloroform ( $\delta$  = 7.26 ppm). <sup>1</sup>H NMR splitting patterns are designated as singlet (s), doublet (d), triplet (t), quartet (q), dd (doublet of doublets), m (multiplet), and broad (br). <sup>13</sup>C NMR spectra were recorded on a Bruker AVANCE III HD400 (100 MHz) spectrometer. High resolution mass spectral analysis (HRMS) was performed on Thermo Fisher Scientific LTQ FT Ultra mass spectrometer. The determination of *ee* was performed using Shimadzu LC-20AD HPLC workstation. X-ray crystallography analysis was performed on Agilent SuperNova X-ray diffractionmeter. Optical rotations were measured using a 1 mL cell with a 5dm path length on an INESA SGW-1 polarimeter and are reported as follows:  $[\alpha]_D^{25}$  (c in g/100 mL solvent). Analytical thin-layer chromatography (TLC) was carried out on WFH-203 F254 pre-coated silica gel plate (0.2 mm thickness). Visualization was performed using a UV lamp, 2,4-Dinitrophenylhydrazine, or potassium permanganate stain.

## II. Optimization of Reaction Conditions

Table S1. Optimization of non-asymmetric all-carbon [4+2] annulation.

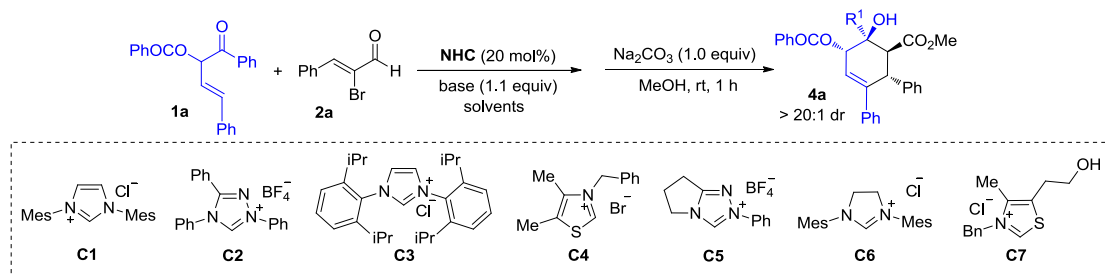

| entry | conditons <sup>a</sup>                                                               | yield (%) <sup>b</sup> |
|-------|--------------------------------------------------------------------------------------|------------------------|
| 1     | <b>C2</b> , Cs <sub>2</sub> CO <sub>3</sub> , THF, 30 °C                             | 0                      |
| 2     | <b>C3</b> , Cs <sub>2</sub> CO <sub>3</sub> , THF, 30 °C                             | 0                      |
| 3     | <b>C4</b> , Cs <sub>2</sub> CO <sub>3</sub> , THF, 30 °C                             | 0                      |
| 4     | <b>C5</b> , Cs <sub>2</sub> CO <sub>3</sub> , THF, 30 °C                             | 0                      |
| 5     | <b>C6</b> , Cs <sub>2</sub> CO <sub>3</sub> , THF, 30 °C                             | 0                      |
| 6     | <b>C7</b> , Cs <sub>2</sub> CO <sub>3</sub> , THF, 30 °C                             | 0                      |
| 7     | <b>C1</b> , Cs <sub>2</sub> CO <sub>3</sub> , THF, 30 °C                             | 74                     |
| 8     | <b>C1</b> , K <sub>2</sub> CO <sub>3</sub> , THF, 30 °C                              | 82                     |
| 9     | <b>C1</b> , CsOAc, THF, 30 °C                                                        | 27                     |
| 10    | <b>C1</b> , Et <sub>3</sub> N, THF, 30 °C                                            | 53                     |
| 11    | <b>C1</b> , DBU, THF, 30 °C                                                          | 0                      |
| 12    | <b>C1</b> , Na <sub>2</sub> CO <sub>3</sub> , THF, 30 °C                             | 28                     |
| 13    | <b>C1</b> , NaHCO <sub>3</sub> , THF, 30 °C                                          | 7                      |
| 14    | <b>C1</b> , KHCO <sub>3</sub> , THF, 30 °C                                           | 46                     |
| 15    | <b>C1</b> , NaOAc, THF, 30 °C                                                        | 8                      |
| 16    | <b>C1</b> , K <sub>2</sub> CO <sub>3</sub> , toluene, 30 °C                          | 76                     |
| 17    | <b>C1</b> , K <sub>2</sub> CO <sub>3</sub> , CH <sub>2</sub> Cl <sub>2</sub> , 30 °C | 55                     |
| 18    | <b>C1</b> , K <sub>2</sub> CO <sub>3</sub> , CH <sub>3</sub> CN, 30 °C               | 41                     |
| 19    | <b>C1</b> , K <sub>2</sub> CO <sub>3</sub> , DMF, 30 °C                              | 30                     |

<sup>a</sup>Reaction conditions: **1a** (0.2 mmol), NHC (20 mol %), solvent (1 mL), base (0.22 mmol), **2a** (0.22 mmol), 6 h, argon protection. Diastereomeric ratio was determined via <sup>1</sup>H NMR analysis of the reaction mixture. <sup>b</sup>Isolated yields based on **1a**.

Table S2. Optimization of enantioselective all-carbon [4+2] annulation.<sup>a</sup>

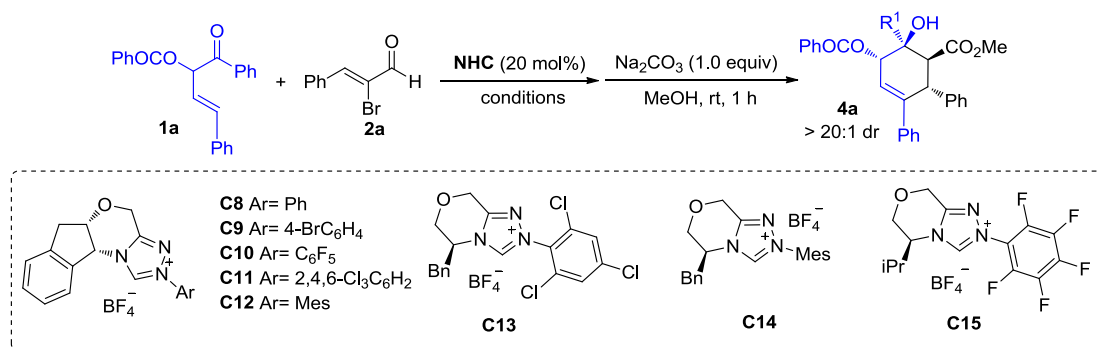

| entry | NHC        | base<br>(equiv)                          | <b>2a</b><br>(equiv) | solvent | additive | yield <sup>b</sup><br>(%) | ee <sup>c</sup><br>(%) |
|-------|------------|------------------------------------------|----------------------|---------|----------|---------------------------|------------------------|
| 1     | <b>C8</b>  | Cs <sub>2</sub> CO <sub>3</sub><br>(1.1) | 1.1                  | THF     | --       | 24                        | -53                    |
| 2     | <b>C9</b>  | Cs <sub>2</sub> CO <sub>3</sub><br>(1.1) | 1.1                  | THF     | --       | trace                     | --                     |
| 3     | <b>C10</b> | Cs <sub>2</sub> CO <sub>3</sub><br>(1.1) | 1.1                  | THF     | --       | --                        | --                     |
| 4     | <b>C11</b> | Cs <sub>2</sub> CO <sub>3</sub><br>(1.1) | 1.1                  | THF     | --       | --                        | --                     |
| 5     | <b>C12</b> | Cs <sub>2</sub> CO <sub>3</sub><br>(1.1) | 1.1                  | THF     | --       | 33                        | -55                    |
| 6     | <b>C13</b> | Cs <sub>2</sub> CO <sub>3</sub><br>(1.1) | 1.1                  | THF     | --       | --                        | --                     |
| 7     | <b>C14</b> | Cs <sub>2</sub> CO <sub>3</sub><br>(1.1) | 1.1                  | THF     | --       | 36                        | 89                     |
| 8     | <b>C15</b> | Cs <sub>2</sub> CO <sub>3</sub><br>(1.1) | 1.1                  | THF     | --       | --                        | --                     |
| 9     | <b>C14</b> | K <sub>2</sub> CO <sub>3</sub> (1.1)     | 1.1                  | THF     | --       | --                        | --                     |
| 10    | <b>C14</b> | LiOH (1.1)                               | 1.1                  | THF     | --       | --                        | --                     |
| 11    | <b>C14</b> | CsOAc<br>(1.1)                           | 1.1                  | THF     | --       | --                        | --                     |
| 12    | <b>C14</b> | <sup>t</sup> BuOLi<br>(1.1)              | 1.1                  | THF     | --       | --                        | --                     |
| 13    | <b>C14</b> | DBU (1.1)                                | 1.1                  | THF     | --       | 27                        | 89                     |
| 14    | <b>C14</b> | Et <sub>3</sub> N (1.1)                  | 1.1                  | THF     | --       | trace                     | --                     |

|    |            |                                              |     |                                 |                     |       |     |
|----|------------|----------------------------------------------|-----|---------------------------------|---------------------|-------|-----|
| 15 | <b>C12</b> | Cs <sub>2</sub> CO <sub>3</sub><br>(1.1)     | 1.1 | THF                             | LiCl (1.0 equiv)    | --    | --  |
| 16 | <b>C14</b> | Cs <sub>2</sub> CO <sub>3</sub><br>(1.1)     | 1.1 | THF                             | LiCl (1.0 equiv)    | --    | --  |
| 17 | <b>C14</b> | <sup>t</sup> BuOK<br>(1.1)                   | 1.1 | THF                             | --                  | trace | --  |
| 18 | <b>C14</b> | Rb <sub>2</sub> CO <sub>3</sub><br>(1.1)     | 1.1 | THF                             | --                  | --    | --  |
| 19 | <b>C14</b> | ( <sup>t</sup> BuO) <sub>2</sub> Mg<br>(1.1) | 1.1 | THF                             | --                  | --    | --  |
| 20 | <b>C14</b> | DABCO<br>(1.1)                               | 1.1 | THF                             | --                  | --    | --  |
| 21 | <b>C12</b> | Cs <sub>2</sub> CO <sub>3</sub><br>(1.1)     | 1.1 | THF                             | 4Å M.S.<br>(100 mg) | 33    | –53 |
| 22 | <b>C14</b> | Cs <sub>2</sub> CO <sub>3</sub><br>(1.1)     | 1.1 | THF                             | 4Å M.S.<br>(100 mg) | 18    | 89  |
| 23 | <b>C14</b> | Cs <sub>2</sub> CO <sub>3</sub><br>(1.1)     | 1.1 | THF                             | 4Å M.S.<br>(200 mg) | 21    | 93  |
| 24 | <b>C14</b> | Cs <sub>2</sub> CO <sub>3</sub><br>(1.1)     | 1.1 | THF                             | 4Å M.S.<br>(300 mg) | 17    | 93  |
| 25 | <b>C14</b> | Cs <sub>2</sub> CO <sub>3</sub><br>(2.0)     | 2.0 | THF                             | 4Å M.S.<br>(100 mg) | 18    | 93  |
| 26 | <b>C14</b> | Cs <sub>2</sub> CO <sub>3</sub><br>(2.0)     | 2.0 | THF                             | 4Å M.S.<br>(200 mg) | 55    | 93  |
| 27 | <b>C14</b> | Cs <sub>2</sub> CO <sub>3</sub><br>(2.0)     | 2.0 | CH <sub>2</sub> Cl <sub>2</sub> | 4Å M.S.<br>(200 mg) | 24    | 93  |
| 28 | <b>C14</b> | Cs <sub>2</sub> CO <sub>3</sub><br>(2.0)     | 2.0 | toluene                         | 4Å M.S.<br>(200 mg) | --    | --  |
| 29 | <b>C14</b> | Cs <sub>2</sub> CO <sub>3</sub><br>(2.0)     | 2.0 | DMF                             | 4Å M.S.<br>(200 mg) | 58    | 66  |
| 30 | <b>C14</b> | Cs <sub>2</sub> CO <sub>3</sub><br>(2.0)     | 2.0 | dioxane                         | 4Å M.S.<br>(200 mg) | 25    | 75  |
| 31 | <b>C14</b> | Cs <sub>2</sub> CO <sub>3</sub><br>(2.0)     | 2.0 | Et <sub>2</sub> O               | 4Å M.S.<br>(200 mg) | --    | --  |
| 32 | <b>C14</b> | Cs <sub>2</sub> CO <sub>3</sub><br>(2.0)     | 2.0 | CH <sub>3</sub> CN              | 4Å M.S.<br>(200 mg) | 44    | 58  |

|    |            |                                          |     |      |                     |    |    |
|----|------------|------------------------------------------|-----|------|---------------------|----|----|
| 33 | <b>C14</b> | Cs <sub>2</sub> CO <sub>3</sub><br>(2.0) | 2.0 | MeOH | 4Å M.S.<br>(200 mg) | -- | -- |
| 34 | <b>C14</b> | Cs <sub>2</sub> CO <sub>3</sub><br>(2.0) | 2.0 | MTBE | 4Å M.S.<br>(200 mg) | -- | -- |
| 35 | <b>C14</b> | Cs <sub>2</sub> CO <sub>3</sub><br>(1.2) | 1.5 | THF  | 4Å M.S.<br>(200 mg) | 66 | 93 |
| 36 | <b>C14</b> | Cs <sub>2</sub> CO <sub>3</sub><br>(1.5) | 1.5 | THF  | 4Å M.S.<br>(200 mg) | 62 | 93 |
| 37 | <b>C14</b> | Cs <sub>2</sub> CO <sub>3</sub><br>(1.2) | 2.0 | THF  | 4Å M.S.<br>(200 mg) | 45 | 93 |
| 38 | <b>C14</b> | Cs <sub>2</sub> CO <sub>3</sub><br>(1.5) | 2.0 | THF  | 4Å M.S.<br>(200 mg) | 46 | 93 |
| 39 | <b>C14</b> | Cs <sub>2</sub> CO <sub>3</sub><br>(1.2) | 1.1 | THF  | 4Å M.S.<br>(200 mg) | 53 | 93 |
| 40 | <b>C14</b> | Cs <sub>2</sub> CO <sub>3</sub><br>(1.2) | 1.2 | THF  | 4Å M.S.<br>(200 mg) | 60 | 93 |
| 41 | <b>C14</b> | Cs <sub>2</sub> CO <sub>3</sub><br>(1.2) | 1.3 | THF  | 4Å M.S.<br>(200 mg) | 66 | 93 |
| 42 | <b>C14</b> | Cs <sub>2</sub> CO <sub>3</sub><br>(1.2) | 1.4 | THF  | 4Å M.S.<br>(200 mg) | 50 | 93 |
| 43 | <b>C14</b> | Cs <sub>2</sub> CO <sub>3</sub><br>(1.5) | 1.3 | THF  | 4Å M.S.<br>(200 mg) | 74 | 93 |
| 44 | <b>C14</b> | Cs <sub>2</sub> CO <sub>3</sub><br>(2.0) | 1.5 | THF  | 4Å M.S.<br>(200 mg) | 80 | 93 |

<sup>a</sup>Reaction conditions: **1a** (0.2 mmol), NHC (20 mol %), solvent (1 mL), argon protection. Diastereomeric ratio was determined via <sup>1</sup>H NMR analysis of the reaction mixtures. <sup>b</sup>Isolated yields based on **1a**. <sup>c</sup>Determined via HPLC analysis on a chiral stationary phase.

### III. Single-Crystal X-Ray Crystallographic Analysis.

Method for single crystal cultivation: a solid sample of **4d** (10–20 mg) was dissolved in ethyl acetate (50–100 µL) in a vial at room temperature, and petroleum ether (2–8 mL) was added into the above solution slowly while keeping the sample all dissolved. Then the vial was sealed with a piece of parafilm and stayed quietly for several days to allow the slow evaporation of the solvents until a single crystal was obtained.

CCDC 1569976 (**4d**) contains the supplementary crystallographic data for this paper. These data can be obtained free of charge from The Cambridge Crystallographic Centre via [www.ccdc.cam.ac.uk/data\\_request/cif](http://www.ccdc.cam.ac.uk/data_request/cif).

| Compound 4d                                                                       | X-ray structure                                                                    |
|-----------------------------------------------------------------------------------|------------------------------------------------------------------------------------|
| 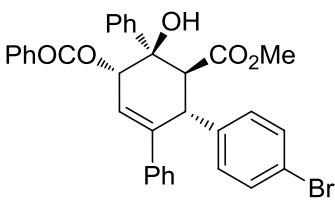 |  |

**Table S3. Crystal data and structure refinement for data of compound 4d:**

|                                  |                                             |                 |
|----------------------------------|---------------------------------------------|-----------------|
| Identification code              | Compound-4d                                 |                 |
| Empirical formula                | C33 H27 Br O5                               |                 |
| Formula weight                   | 583.45                                      |                 |
| Temperature                      | 293.15 K                                    |                 |
| Wavelength                       | 0.71073 Å                                   |                 |
| Crystal system                   | Monoclinic                                  |                 |
| Space group                      | P 21                                        |                 |
| Unit cell dimensions             | a = 10.024(5) Å                             | a = 90 °        |
|                                  | b = 11.074(5) Å                             | b = 92.686(9) ° |
|                                  | c = 13.112(6) Å                             | g = 90 °        |
| Volume                           | 1454.0(12) Å <sup>3</sup>                   |                 |
| Z                                | 2                                           |                 |
| Density (calculated)             | 1.333 Mg/m <sup>3</sup>                     |                 |
| Absorption coefficient           | 1.452 mm <sup>-1</sup>                      |                 |
| F(000)                           | 600                                         |                 |
| Crystal size                     | 0.800 x 0.400 x 0.300 mm <sup>3</sup>       |                 |
| Theta range for data collection  | 3.106 to 27.429 °                           |                 |
| Index ranges                     | -11 ≤ h ≤ 12, -14 ≤ k ≤ 13, -16 ≤ l ≤ 16    |                 |
| Reflections collected            | 12172                                       |                 |
| Independent reflections          | 5835 [R(int) = 0.0435]                      |                 |
| Completeness to theta = 25.242 ° | 99.2 %                                      |                 |
| Absorption correction            | Semi-empirical from equivalents             |                 |
| Max. and min. transmission       | 1.0000 and 0.7225                           |                 |
| Refinement method                | Full-matrix least-squares on F <sup>2</sup> |                 |

|                                   |                                    |
|-----------------------------------|------------------------------------|
| Data / restraints / parameters    | 5835 / 101 / 354                   |
| Goodness-of-fit on F <sup>2</sup> | 0.732                              |
| Final R indices [I>2sigma(I)]     | R1 = 0.0477, wR2 = 0.1078          |
| R indices (all data)              | R1 = 0.0762, wR2 = 0.1157          |
| Absolute structure parameter      | 0.255(12)                          |
| Extinction coefficient            | n/a                                |
| Largest diff. peak and hole       | 0.179 and -0.356 e.Å <sup>-3</sup> |

#### IV.

##### 1. General procedures for the preparation of substrates.

(1) Procedures for the synthesis of **1a**, **1i**, **1k**, and **1p**:

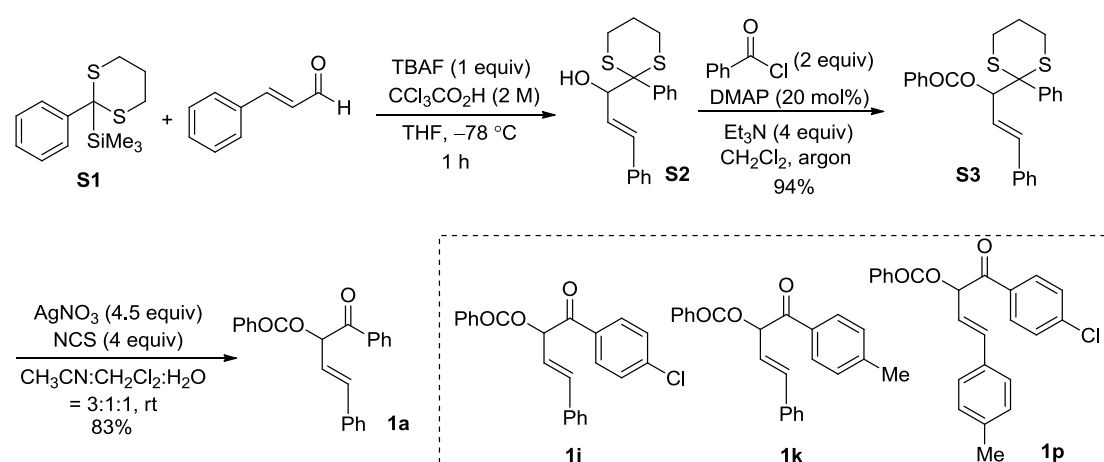

Typically, to a 50-mL round bottom flask with septum and stir bar was added **S1** (805.5 mg, 3.0 mmol, 1.5 equiv). The flask was evacuated and backfilled with argon twice, then *trans*-cinnamaldehyde (264 mg, 252  $\mu$ L, 2.0 mmol, 1.0 equiv) and 20 mL of THF were added by syringe. The reaction was cooled to -78 °C and stirred under argon atmosphere. A freshly prepared solution of TBAF (1 equiv) in THF (0.2 M) was added dropwise to the reaction mixture and stirred at -78 °C for 1 hour. The reaction was quenched at -78 °C with 20 mL of 2.0 M Cl<sub>3</sub>CCO<sub>2</sub>H in THF. The cooling bath was then removed and the reaction was stirred at room temperature for 0.5 hour. To the reaction mixture was added 50 mL of Et<sub>2</sub>O and transferred to a separatory funnel containing 50 mL of sat. NaHCO<sub>3</sub> aqueous solution. After work-up the ether layer was collected and washed with distilled water (2  $\times$  20 mL) and saturated brine (1  $\times$  20 mL). The organic phase was dried over anhydrous Na<sub>2</sub>SO<sub>4</sub>, and concentrated using

rotary evaporation. Purification of crude product through a silica gel column using a mixture of hexane and ethyl acetate (70:30 v/v) as eluent gave **S2** (520 mg, 79% yield).

To a solution of **S2** (1.6 mmol, 520 mg, 1.0 equiv) in 10 mL of CH<sub>2</sub>Cl<sub>2</sub> under argon at 0 °C was added DMAP (0.32 mmol, 39 mg, 20 mol%) and 4 equiv of Et<sub>3</sub>N. Then benzoyl chloride (2 equiv) was added dropwise to the stirred solution at 0 °C. The reaction mixture was slowly warmed to room temperature and stirred overnight. After the starting materials were consumed, the reaction mixture was extracted with dichloromethane (20 mL) and water. The organic layer was then separated, dried over anhydrous sodium sulfate and concentrated using rotary evaporation. Purification of crude product through a silica gel column using a mixture of hexane and ethyl acetate (80:20 v/v) as eluent gave **S3** (650 mg, 94% yield).

To the solution of **S3** (1.5 mmol, 1 equiv) in acetonitrile/dichloromethane/water (3:1:1) were added the mixture of *N*-chlorosuccinimide (4 equiv) and AgNO<sub>3</sub> (4.5 equiv) at room temperature. The mixture was stirred at room temperature for 20 minutes. After completion, aqueous Na<sub>2</sub>S<sub>2</sub>O<sub>3</sub> solution was added. Then the reaction mixture was extracted with CH<sub>2</sub>Cl<sub>2</sub>, dried over anhydrous Na<sub>2</sub>SO<sub>4</sub>, concentrated and purified by column chromatography using a mixture of petroleum ether and ethyl acetate (90:10 v/v) as eluent to give **1a** (426 mg, 83% yield).

## (2) Procedures for the synthesis of **1j**, **1l**, **1m**, **1n**, and **1o**:

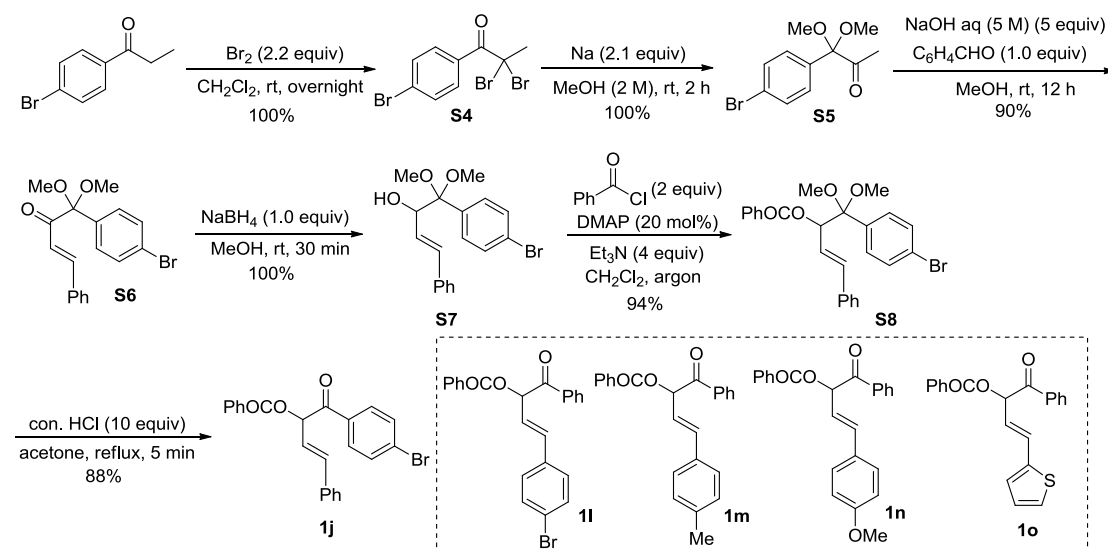

Typically, to a solution of 4-bromophenylactone (5.0 mmol, 1.0 equiv) in  $\text{CH}_2\text{Cl}_2$  (50 mL) was added  $\text{Br}_2$  (11.0 mmol, 2.2 equiv) dropwise at room temperature. The reaction mixture was stirred overnight. After full consumption of starting material, saturated  $\text{NaHCO}_3$  aqueous solution and saturated  $\text{Na}_2\text{S}_2\text{O}_3$  aqueous solution were added to the reaction mixture. After having been stirred for 5 minutes, the reaction mixture was extracted with dichloromethane (20 mL) and water. The organic layer was then separated, dried over anhydrous sodium sulfate and concentrated using rotary evaporation. Purification of crude product through a silica gel column using a mixture of hexane and ethyl acetate (10:1 v/v) as eluent gave **S4** (1.9 g, 100% yield).

Sodium turnings (5.0 mmol, 2.1 equiv) was added in portions to MeOH (2.0 M). After sodium was dissolved completely into MeOH, the starting material **S4** (2.4 mmol, 1.0 equiv) was added by syringe dropwise to the above solution. After 2h, the reaction mixture was checked by TLC, then added water and brine before the reaction mixture was extracted with dichloromethane (20 mL) and water. The organic layer was then separated, dried over anhydrous sodium sulfate and concentrated using rotary evaporation. Purification of crude product through a silica gel column using a mixture of hexane and ethyl acetate (10:1 v/v) as eluent gave **S5** (655 mg, 100% yield).

In a 100 mL round bottom flask was taken a mixture of benzaldehyde (5.0 mmol, 1 equiv) and **S5** (5.0 mmol, 1 equiv) in 10 mL of methanol. Then a 4.5 mL of 5 M aqueous sodium hydroxide solution (25 mmol) were added. The mixture was stirred for 12 h at room temperature. After the reaction was completed, methanol was removed under reduced pressure and the remaining aqueous phase was extracted with methylene chloride and the organic phase was washed with brine. After drying with anhydrous  $\text{Na}_2\text{SO}_4$  and evaporation of the organic phase, purification of crude product through a silica gel column using a mixture of hexane and ethyl acetate (10:1 v/v) as eluent gave **S6** (1.7 g, 92% yield).

To a solution of **S6** (5 mmol, 1.0 equiv) in absolute MeOH (10 mL) was added  $\text{NaBH}_4$  (5 mmol, 1.0 equiv) at room temperature. The mixture was stirred at room temperature for 30 minutes. After completion,  $\text{H}_2\text{O}$  and brine were added. Then the

reaction mixture was extracted with  $\text{CH}_2\text{Cl}_2$ , dried over anhydrous  $\text{Na}_2\text{SO}_4$ , concentrated and purified by column chromatography using a mixture of petroleum ether and ethyl acetate (90:10 v/v) as eluent to give **S7** (1.8 g, 100% yield).

To a solution of **S7** (5 mmol, 1.0 equiv) in 10 mL of  $\text{CH}_2\text{Cl}_2$  under argon at 0 °C was added 20 mol% of DMAP and 4 equiv of  $\text{Et}_3\text{N}$ . Then benzoyl chloride (2 equiv) was added dropwise to the stirred solution at 0 °C. The reaction mixture was slowly warmed to room temperature and stirred overnight. After the starting materials were consumed, the reaction mixture was extracted with dichloromethane (20 mL) and water. The organic layer was then separated, dried over anhydrous sodium sulfate and concentrated using rotary evaporation. Purification of the crude product through a silica gel column using a mixture of hexane and ethyl acetate (80:20 v/v) as eluent gave **S8** (2.2 g, 94% yield).

To a solution of **S8** (5.0 mmol, 1.0 equiv) in acetone (20 mL) was added concentrated HCl (50 mmol, 10.0 equiv), and refluxed for 5 minutes until some precipitates were generated from the reaction mixture. After checked by TLC, the reaction mixture was cooled to room temperature. The solids were filtered and washed with a mixture of hexane and ethyl acetate (100:1 v/v). Collection of the solid by filtration afforded **1j** (1.9 g, 88% yield). Then the solid was further dried under vacuum and used for the NHC-catalyzed reactions.

### (3) Procedures for the synthesis of **1t**:

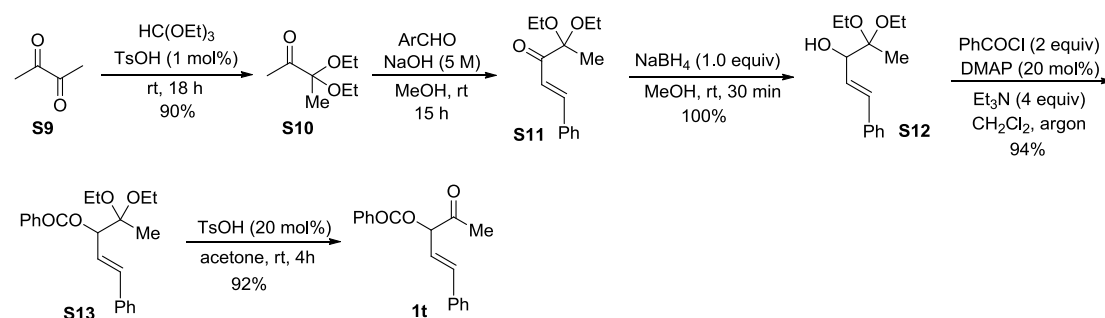

The reaction of butane-2,3-dione **S9** with triethylorthoformate afforded 3,3-diethoxybutane-2-one **S10** in 90% yield according to the reported method (*J. Org. Chem.* **1995**, 60, 8204; *Angew. Chem., Int. Ed.* **2016**, 55, 1208). In a 100 mL round bottom flask was taken a mixture of aromatic aldehyde (5.0 mmol, 1 equiv) and

3,3-diethoxybutane-2-one **S10** (800.5 mg, 5.0 mmol, 1 equiv) in 10 mL of methanol. Then a 4.5 mL of 5M aqueous sodium hydroxide solution was added. The mixture was stirred for 15 h at room temperature. After the reaction was complete, methanol was removed under reduced pressure and the remaining aqueous phase was extracted with methylene chloride and the organic phase was washed with brine. After drying with anhydrous Na<sub>2</sub>SO<sub>4</sub> and evaporation of the organic phase, product **S11** (721 mg, 90% yield) was pure enough and can be used in the next step.

To a solution of **S11** (5 mmol, 1.0 equiv) in absolute MeOH (10 mL) was added NaBH<sub>4</sub> (5 mmol, 1.0 equiv) at room temperature. The mixture was stirred at room temperature for 30 minutes. After completion, H<sub>2</sub>O and brine were added. Then the reaction mixture was extracted with CH<sub>2</sub>Cl<sub>2</sub>, dried over anhydrous Na<sub>2</sub>SO<sub>4</sub>, concentrated and purified by column chromatography using a mixture of petroleum ether and ethyl acetate (90:10 v/v) as eluent to give **S12** (1.3 g, 100% yield).

To the solution of **S12** (5 mmol) in 10 mL of CH<sub>2</sub>Cl<sub>2</sub> under argon at 0 °C was added 20 mol% of DMAP and 4 equiv of Et<sub>3</sub>N. Then benzoyl chloride (2 equiv) was added dropwise to the solution was stirred at 0 °C. The reaction mixture was slowly warmed to room temperature and stirred overnight. After the starting materials were consumed, the reaction mixture was extracted with dichloromethane (20 mL) and water. The organic layer was then separated, dried over anhydrous sodium sulfate and concentrated using rotary evaporation. Purification of the crude product through a silica gel column using a mixture of hexane and ethyl acetate (80:20 v/v) as eluent gave **S13** (1.7 g, 94% yield).

In a 50 mL round bottom flask, acetal **S13** (5 mmol) was dissolved in 20 mL of acetone. To this solution *p*-TSA (20 mol%) was added and the mixture was stirred for 3 h at room temperature. The solvent was evaporated under reduced pressure and the residue was dissolved in methylene chloride and washed with water. Drying of the organic phase with anhydrous Na<sub>2</sub>SO<sub>4</sub> and the following evaporation gave the crude product as a yellowish solid. The yellow solid was kept for crystallization in petroleum ether/methylene chloride (4:1 v/v, 20 mL). After crystallization, the yellow

solid was filtered through a Büchner funnel to afford  $\alpha,\beta$ -unsaturated compound **1t** (1.3 g, 92%).

#### (4) Procedures for the synthesis of **1u**:

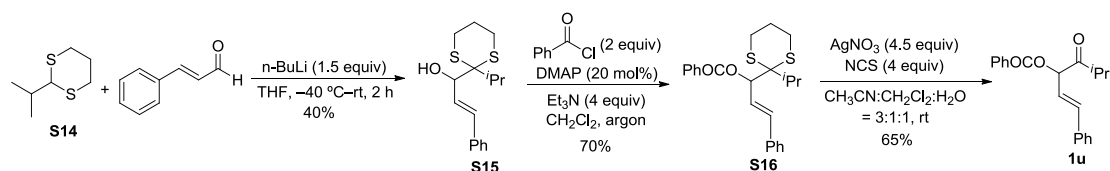

To a 50-mL round bottom flask with septum and stir bar was added **S14** (3.0 mmol, 1.0 equiv). The flask was evacuated and backfilled with argon twice before 20 mL of THF was added. *n*-Butyllithium (4.5 mmol, 1.5 equiv) was subsequently added dropwise by syringe at  $-40\text{ }^{\circ}\text{C}$ . The reaction mixture was stirred for 1 h at  $-40\text{ }^{\circ}\text{C}$  under argon atmosphere. Then cinnamaldehyde (3.0 mmol, 1.0 equiv) was added dropwise to the above reaction mixture at the same temperature. After cinnamaldehyde was consumed completely (about 1 h), the reaction mixture was quenched with water at  $-40\text{ }^{\circ}\text{C}$  and the ice bath was removed. After the reaction mixture was warmed to room temperature, the solvent was removed under vacuum and the crude product was extracted with  $\text{CH}_2\text{Cl}_2$ . The organic layers were collected and dried over anhydrous sodium sulfate before evaporation. The residue was purified by silica gel column chromatography using the mixture of hexanes/ethyl acetate (80:20 v/v) as eluent to give **S15** (353 mg, 40% yield).

To a solution of **S15** (5 mmol) in 10 mL of  $\text{CH}_2\text{Cl}_2$  under argon at  $0\text{ }^{\circ}\text{C}$  was added 20 mol% of DMAP and 4 equiv of  $\text{Et}_3\text{N}$ . Then benzoyl chloride (2 equiv) was added dropwise to the stirred solution at  $0\text{ }^{\circ}\text{C}$ . The reaction mixture was slowly warmed to room temperature and stirred overnight. After the starting materials were consumed, the reaction mixture was extracted with dichloromethane (20 mL) and water. The organic layer was then separated, dried over anhydrous sodium sulfate and concentrated using rotary evaporation. Purification of the crude product through a silica gel column using a mixture of hexanes and ethyl acetate (80:20 v/v) as eluent gave **S16** (1.4 g, 70% yield).

To the solution of **S16** (5.0 mmol, 1 equiv) in acetonitrile/dichloromethane/water (3:1:1) was added the mixture of *N*-chlorosuccinimide (4 equiv) and AgNO<sub>3</sub> (4.5 equiv) at room temperature. The mixture was stirred at room temperature for 20 minutes. After completion, aqueous Na<sub>2</sub>S<sub>2</sub>O<sub>3</sub> solution was added. Then the reaction mixture was extracted with CH<sub>2</sub>Cl<sub>2</sub>, dried over anhydrous Na<sub>2</sub>SO<sub>4</sub>, concentrated and purified by column chromatography using a mixture of petroleum ether and ethyl acetate (90:10 v/v) as eluent to give **1u** (1.0 g, 65% yield).

(5) Procedures for the synthesis of **1v**, **1w**, **1x**, **1y**, and **1z**:

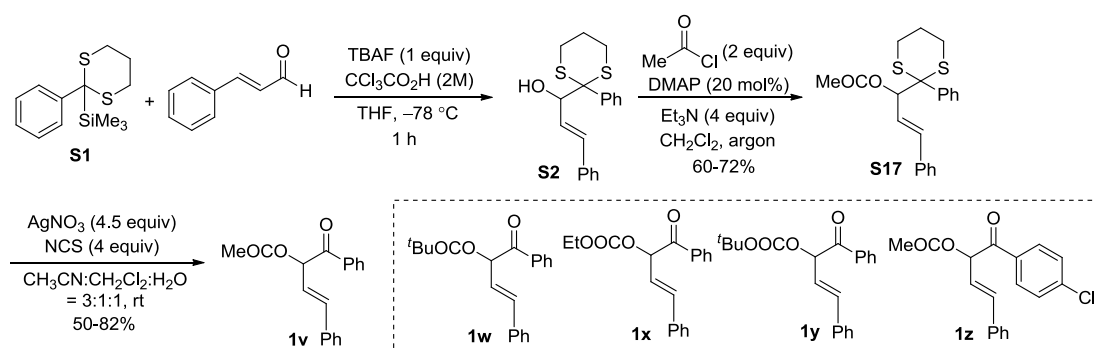

To a 50-mL round bottom flask with septum and stir bar was added **S1** (805.5 mg, 3.0 mmol, 1.5 equiv). The flask was evacuated and backfilled with argon twice, then *trans*-cinnamaldehyde (264 mg, 252  $\mu$ L, 2.0 mmol, 1.0 equiv) and 20 mL of THF were added by syringe. The reaction was cooled to -78 °C and stirred under argon atmosphere. A freshly prepared solution of TBAF (1 equiv) in THF (0.2 M) was added dropwise to the reaction mixture and stirred at -78 °C for 1 hour. The reaction was quenched at -78 °C with 20 mL of 2.0 M CCl<sub>3</sub>CO<sub>2</sub>H in. The cooling bath was then removed and the reaction was stirred at room temperature for 0.5 hour. The reaction mixture was added 50 mL of Et<sub>2</sub>O and transferred to a separatory funnel containing 50 mL of sat. NaHCO<sub>3</sub> aq solution. After work-up the ether layer was separated and washed with distilled water (2  $\times$  20 mL) and saturated brine (1  $\times$  20 mL). The organic phase was dried over anhydrous Na<sub>2</sub>SO<sub>4</sub>, and concentrated using rotary evaporation. Purification of the crude product through a silica gel column using a mixture of hexane and ethyl acetate (70:30 v/v) as eluent gave **S2** (520 mg, 79% yield).

To a solution of **S2** (5 mmol) in 10 mL of CH<sub>2</sub>Cl<sub>2</sub> under argon at 0 °C was added 20 mol% of DMAP and 4 equiv of Et<sub>3</sub>N. Then acetyl chloride (2 equiv) was added dropwise to the stirred solution at 0 °C. The reaction mixture was warmed to room temperature and stirred overnight. After the starting materials were consumed, the reaction mixture was extracted with dichloromethane (20 mL) and water. The organic layer was then separated, dried over anhydrous sodium sulfate and concentrated using rotary evaporation. Purification of crude product through a silica gel column using a mixture of hexane and ethyl acetate (80:20 v/v) as eluent gave **S17** (1.1 g, 60%).

To the solution of **S17** (5.0 mmol, 1 equiv) in acetonitrile/dichloromethane/water (3:1:1) was added the mixture of *N*-chlorosuccinimide (4 equiv) and AgNO<sub>3</sub> (4.5 equiv) at room temperature. The mixture was stirred at room temperature for 20 minutes. After completion, aqueous Na<sub>2</sub>S<sub>2</sub>O<sub>3</sub> solution was added. Then the reaction mixture was extracted with CH<sub>2</sub>Cl<sub>2</sub>, dried over anhydrous Na<sub>2</sub>SO<sub>4</sub>, concentrated and purified by column chromatography using a mixture of petroleum ether and ethyl acetate (90:10 v/v) as eluent to give **1v** (700 mg, 50% yield).

## 2. General procedures for the annulation reactions.

(1) General procedure for the non-asymmetric all-carbon [4+2] annulation:

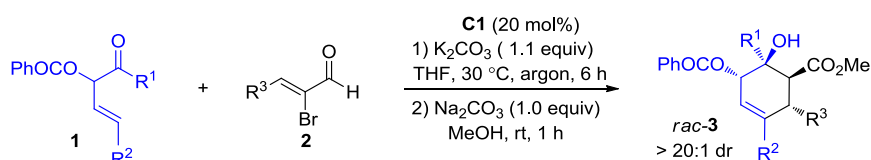

To a dried 10 mL Schlenk tube equipped with a tiny magnetic stir bar were added catalyst **C1** (13.6 mg, 20 mol %), K<sub>2</sub>CO<sub>3</sub> (30.4 mg, 0.22 mmol, 1.1 equiv), **1a** (68.5 mg, 0.2 mmol, 1 equiv), and  $\alpha$ -bromocinnamaldehyde **2a** (46.4 mg, 0.22 mmol, 1.1 equiv). After argon was backfilled twice, THF (1 mL) was added and the resulting solution was stirred for 6h at 30 °C. After completion of the reaction, solvent was evaporated and the resulting crude product was purified through a short column chromatography on silica gel with petroleum ether/ethyl acetate (4:1 v/v) as eluent to afford the cyclohexyl  $\beta$ -lactone product and it was used immediately for the next step.

To a solution of the cyclohexyl  $\beta$ -lactone (0.2 mmol, 1.0 equiv) in MeOH (1 mL) was added Na<sub>2</sub>CO<sub>3</sub> (0.2 mmol, 1.0 equiv) at room temperature. After the completion

of reaction, water and brine were added, and the reaction mixture was extracted with CH<sub>2</sub>Cl<sub>2</sub>, dried over anhydrous Na<sub>2</sub>SO<sub>4</sub>, concentrated and purified by column chromatography using a mixture of petroleum ether and ethyl acetate (5:1 v/v) as eluent to give *rac*-**3a** (82 mg, 82% yield over two steps).

(2) General procedure for the asymmetric all-carbon [4+2] annulation:

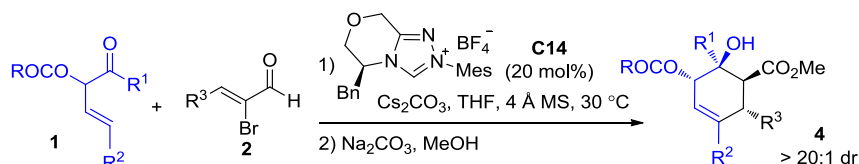

To a dried 10 mL Schlenk tube equipped with a tiny magnetic stir bar were added catalyst **C10** (16.8 mg, 20 mol %), Cs<sub>2</sub>CO<sub>3</sub> (130 mg, 0.4 mmol, 2.0 equiv), **1a** (68.5 mg, 0.2 mmol, 1 equiv),  $\alpha$ -bromocinnamaldehyde **2a** (63.3 mg, 0.3 mmol, 1.5 equiv) and 4Å molecular sieves (400 mg). The tube was backfilled with argon twice. THF (1 mL) was added and the resulting solution was stirred for 12 h at 30 °C. After completion of the reaction, solvent was evaporated after filtration through celite and the resulting crude product was purified through a short column chromatography on silica gel with petroleum ether/ethyl acetate (4:1 v/v) as eluent to afford the cyclohexenyl  $\beta$ -lactone product and it was used immediately for the next step.

To a solution of the cyclohexenyl  $\beta$ -lactone (0.2 mmol, 1.0 equiv) in MeOH (1 mL) was added Na<sub>2</sub>CO<sub>3</sub> (0.2 mmol, 1.0 equiv) and stirred at room temperature. After the completion of the reaction, water and brine were added, and the reaction mixture was extracted with CH<sub>2</sub>Cl<sub>2</sub>, dried over anhydrous Na<sub>2</sub>SO<sub>4</sub>, concentrated and purified by column chromatography using a mixture of petroleum ether and ethyl acetate (5:1 v/v) as eluent to give **4a** (81 mg, 80% yield over two steps).

### 3. Procedures for products derivatizations.

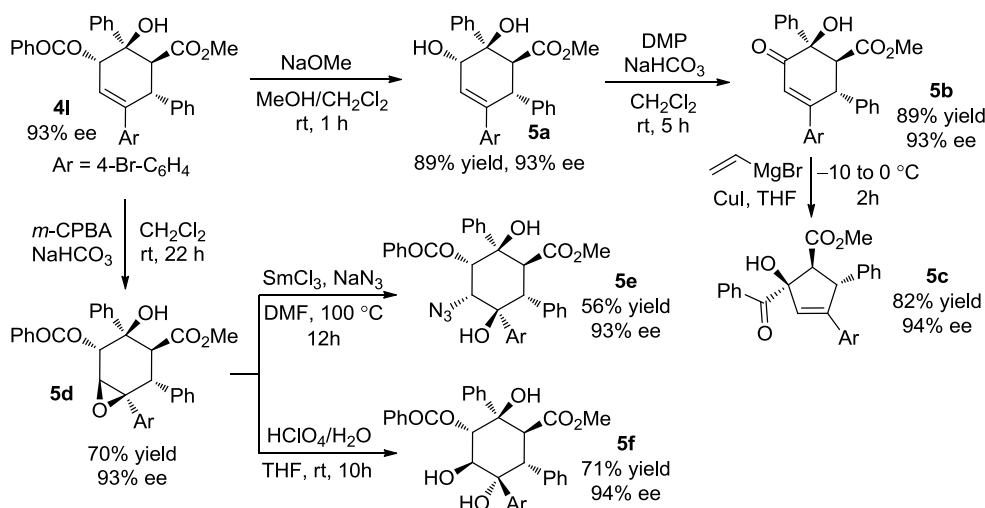

**Synthesis of compound 5a.** To the solution of **4l** (467 mg, 0.8 mmol) in MeOH/CH<sub>2</sub>Cl<sub>2</sub> (1:1 v/v, 8.0 mL) was added 4.0 mL solution of NaOMe (1.0 M in MeOH) at room temperature. The mixture was stirred at room temperature for 1 hour. After completion, the reaction mixture was diluted by water, extracted with CH<sub>2</sub>Cl<sub>2</sub>, dried over anhydrous Na<sub>2</sub>SO<sub>4</sub>, concentrated and purified by column chromatography using a mixture of petroleum ether and ethyl acetate (5:1 v/v) as eluent gave **5a** as a white solid in 89% yield (340.3 mg).

**Synthesis of compound 5b.** To a solution of **5a** (144 mg, 0.3 mmol) in 12 mL CH<sub>2</sub>Cl<sub>2</sub> at room temperature, was added 3 equiv of NaHCO<sub>3</sub> (76 mg, 0.9 mmol) and 2 equiv of Dess-Martin periodinane (254 mg, 0.6 mmol). After having been stirred for 5 h, the reaction was quenched via addition of saturated aqueous NaHCO<sub>3</sub> (10 mL) and Na<sub>2</sub>S<sub>2</sub>O<sub>3</sub> (10 mL), and diluted with CH<sub>2</sub>Cl<sub>2</sub> (10 mL). The biphasic mixture was vigorously stirred at room temperature for 15 min and then the aqueous phase was extracted with CH<sub>2</sub>Cl<sub>2</sub> (3 × 10 mL). The combined organic extracts were dried over Na<sub>2</sub>SO<sub>4</sub>, filtered and concentrated and the crude product was purified by column chromatography using a mixture of petroleum ether and ethyl acetate (4:1 v/v) as eluent to give **5b** as a white solid in 89% yield (127.1 mg).

**Synthesis of compound 5c.** To a solution of CuI (38 mg, 0.2 mmol) in 1.0 mL dry THF at -10 °C, was added CH<sub>2</sub>CHMgBr solution (1.0 M in THF, 400 μL). After having been stirred for 10 mins, **5b** (48 mg, 0.1 mmol) was added, then the mixture was stirred at room temperature for 2h. The reaction was quenched with saturated

aqueous  $\text{NH}_4\text{Cl}$ /25% aqueous  $\text{NH}_3$  (9:1 v/v, 10 mL), then the aqueous phase was extracted with  $\text{CH}_2\text{Cl}_2$  ( $2 \times 10$  mL). The combined organic extracts were dried over  $\text{Na}_2\text{SO}_4$ , filtered and concentrated and the crude product was purified by column chromatography using a mixture of petroleum ether and ethyl acetate (10:1 v/v) as eluent to give **5c** as a white solid in 82% yield (39.0 mg).

**Synthesis of compound 5d.** To a solution of **4l** (467 mg, 0.8 mmol) in dry  $\text{CH}_2\text{Cl}_2$  (16 mL) at room temperature, was added *m*-chloroperoxybenzoic acid (413 mg, 2.4 mmol) and  $\text{NaHCO}_3$  (202 mg, 2.4 mmol). The mixture was stirred at room temperature for 22 h, then the reaction was quenched via addition of saturated aqueous  $\text{NaHCO}_3$  (10 mL) and  $\text{Na}_2\text{S}_2\text{O}_3$  (10 mL) after completion, and diluted with  $\text{CH}_2\text{Cl}_2$  (10 mL). The biphasic mixture was vigorously stirred at room temperature for 10 min and then the aqueous phase was extracted with  $\text{CH}_2\text{Cl}_2$  ( $2 \times 20$  mL). The combined organic extracts were dried over  $\text{Na}_2\text{SO}_4$ , filtered and concentrated and the crude product was purified by column chromatography using a mixture of petroleum ether and ethyl acetate (10:1 v/v) as eluent to give **5d** as a white solid in 70% yield (334.9 mg).

**Synthesis of compound 5e.** To a solution of **5d** (100 mg, 0.167 mmol) in 1.67 mL dry DMF at room temperature, was added  $\text{NaN}_3$  (108 mg, 1.67 mmol) and  $\text{SmCl}_3$  (26 mg, 0.167 mmol). The mixture was stirred at 100 °C under argon atmosphere for 12 h. After cooled to room temperature, the mixture was diluted by ethyl acetate (20 mL), then washed by saturated aqueous  $\text{NaCl}$  ( $3 \times 20$  mL). The organic phase was dried over  $\text{Na}_2\text{SO}_4$ , filtered and concentrated and the crude product was purified by column chromatography using a mixture of petroleum ether and ethyl acetate (10:1 v/v) as eluent to give **5c** as a white solid in 56% yield (59.9 mg).

**Synthesis of compound 5f.** To a solution of **5d** (105 mg, 0.175 mmol) in 5 mL THF at room temperature, was added 5 drops  $\text{HClO}_4$  (60% in water). After stirred at room temperature for 10 h, the reaction was quenched via addition of saturated aqueous  $\text{NaHCO}_3$  (20 mL), then the aqueous phase was extracted with  $\text{CH}_2\text{Cl}_2$  ( $2 \times 20$  mL). The combined organic extracts were dried over  $\text{Na}_2\text{SO}_4$ , filtered and concentrated and the crude product was purified by column chromatography using a mixture of

petroleum ether and ethyl acetate (5:1 v/v) as eluent to give **5f** as a white solid in 71% yield (76.5 mg).

## V. Characterizations of New Compounds.

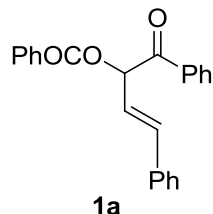

**(E)-1-oxo-1,4-diphenylbut-3-en-2-yl benzoate (1a):** White solid, 141.9 mg, 83% yield. Mp 147–149 °C.  $^1\text{H}$  NMR (400 MHz,  $\text{CDCl}_3$ )  $\delta$  8.15–8.07 (m, 4H), 7.59–7.55 (m, 2H), 7.49–7.39 (m, 6H), 7.32–7.23 (m, 3H), 6.95 (d,  $J$  = 15.9 Hz, 1H), 6.72 (d,  $J$  = 7.6 Hz, 1H), 6.46 (dd,  $J$  = 15.9 and 7.6 Hz, 1H);  $^{13}\text{C}$  NMR (100 MHz,  $\text{CDCl}_3$ )  $\delta$  194.1, 166.0, 136.9, 135.7, 134.8, 133.8, 133.5, 130.1, 129.5, 128.93, 128.92, 128.83, 128.81, 128.6, 127.0, 121.5, 76.7; HRMS (ESI,  $m/z$ ): calcd. for  $\text{C}_{23}\text{H}_{19}\text{O}_3^+$  343.1329, found 343.1329; IR (KBr thin film,  $\text{cm}^{-1}$ ):  $\nu$  3062, 1718, 1698, 1271, 1109, 709.

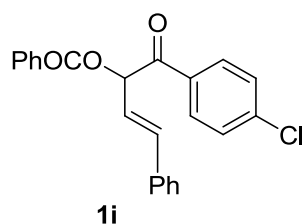

**(E)-1-(4-chlorophenyl)-1-oxo-4-phenylbut-3-en-2-yl benzoate (1i):** White solid, 118.4 mg, 63% yield. Mp 142–143 °C.  $^1\text{H}$  NMR (400 MHz,  $\text{CDCl}_3$ )  $\delta$  8.14–8.12 (m, 2H), 8.03–8.00 (m, 2H), 7.60–7.57 (m, 1H), 7.48–7.39 (m, 6H), 7.34–7.25 (m, 3H), 6.94 (d,  $J$  = 15.9 Hz, 1H), 6.64 (d,  $J$  = 7.7 Hz, 1H), 6.43 (dd,  $J$  = 15.9 and 7.7 Hz, 1H);  $^{13}\text{C}$  NMR (100 MHz,  $\text{CDCl}_3$ )  $\delta$  193.1, 166.0, 140.3, 137.3, 135.5, 133.7, 133.1, 130.3, 130.1, 129.34, 129.30, 129.0, 128.9, 128.6, 127.0, 121.1, 76.8; HRMS (ESI,  $m/z$ ): calcd. for  $\text{C}_{23}\text{H}_{18}\text{ClO}_3^+$  377.0939, found 377.0944; IR (KBr thin film,  $\text{cm}^{-1}$ ):  $\nu$  3063, 1718, 1699, 1588, 1273, 1245, 1093, 709.

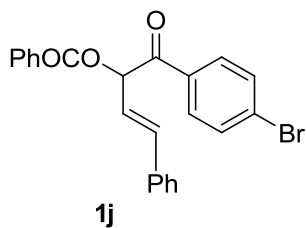

**(*E*)-1-(4-bromophenyl)-1-oxo-4-phenylbut-3-en-2-yl benzoate (1j):** White solid, 184.8 mg, 88% yield. Mp 142–144 °C.  $^1\text{H}$  NMR (400 MHz,  $\text{CDCl}_3$ )  $\delta$  8.13–8.11 (m, 2H), 7.94–7.92 (m, 2H), 7.63–7.57 (m, 3H), 7.48–7.39 (m, 4H), 7.34–7.25 (m, 3H), 6.94 (d,  $J = 15.9$  Hz, 1H), 6.63 (d,  $J = 7.5$  Hz, 1H), 6.43 (dd,  $J = 15.9$  and 7.5 Hz, 1H);  $^{13}\text{C}$  NMR (100 MHz,  $\text{CDCl}_3$ )  $\delta$  193.4, 166.0, 137.3, 135.6, 133.7, 133.6, 132.3, 130.4, 130.1, 129.4, 129.2, 129.0, 128.9, 128.7, 127.1, 121.1, 76.8; HRMS (ESI,  $m/z$ ): calcd. for  $\text{C}_{23}\text{H}_{18}\text{BrO}_3^+$  421.0434, found 421.0435; IR (KBr thin film,  $\text{cm}^{-1}$ ):  $\nu$ 3064, 1717, 1699, 1541, 1272, 713.

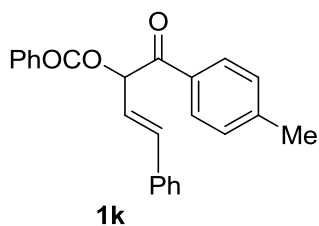

**(*E*)-1-oxo-4-phenyl-1-p-tolylbut-3-en-2-yl benzoate (1k):** White solid, 124.6 mg, 70% yield. Mp 141–142 °C.  $^1\text{H}$  NMR (400 MHz,  $\text{CDCl}_3$ )  $\delta$  8.15–8.13 (m, 2H), 7.99–7.97 (m, 2H), 7.58–7.55 (m, 1H), 7.46–7.38 (m, 4H), 7.32–7.24 (m, 5H), 6.94 (d,  $J = 16.0$  Hz, 1H), 6.71 (d,  $J = 7.5$  Hz, 1H), 6.46 (dd,  $J = 16.0$  and 7.5 Hz, 1H);  $^{13}\text{C}$  NMR (100 MHz,  $\text{CDCl}_3$ )  $\delta$  193.6, 165.9, 144.8, 136.7, 135.8, 133.5, 132.3, 130.1, 129.6, 129.1, 128.8, 128.6, 127.0, 121.7, 76.7, 21.9; HRMS (ESI,  $m/z$ ): calcd. for  $\text{C}_{24}\text{H}_{21}\text{O}_3^+$  357.1485, found 357.1486; IR (KBr thin film,  $\text{cm}^{-1}$ ):  $\nu$  3056, 1717, 1698, 1266, 739, 709.

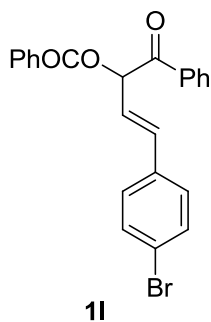

**(E)-4-(4-bromophenyl)-1-oxo-1-phenylbut-3-en-2-yl benzoate (1l):** White solid, 184.8 mg, 88% yield. Mp 149–152 °C.  $^1\text{H}$  NMR (400 MHz,  $\text{CDCl}_3$ )  $\delta$  8.14–8.12 (m, 2H), 8.07–8.05 (m, 2H), 7.61–7.57 (m, 2H), 7.51–7.43 (m, 6H), 7.27–7.25 (m, 2H), 6.88 (d,  $J = 16.0$  Hz, 1H), 6.71 (d,  $J = 7.4$  Hz, 1H), 6.45 (dd,  $J = 16.0$  and 7.4 Hz, 1H);  $^{13}\text{C}$  NMR (100 MHz,  $\text{CDCl}_3$ )  $\delta$  194.0, 165.9, 135.5, 134.8, 134.7, 134.0, 133.6, 132.0, 130.1, 129.5, 129.0, 128.9, 128.6, 128.5, 122.8, 122.3, 76.5; HRMS (ESI,  $m/z$ ): calcd. for  $\text{C}_{23}\text{H}_{18}\text{BrO}_3^+$  421.0434, found 421.0435; IR (KBr thin film,  $\text{cm}^{-1}$ ):  $\nu$  2922, 1718, 1699, 1268, 1070, 709.

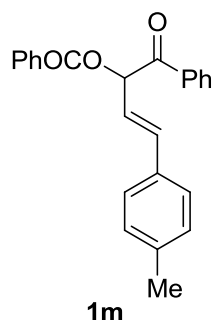

**(E)-1-oxo-1-phenyl-4-p-tolylbut-3-en-2-yl benzoate (1m):** White solid, 160.2 mg, 90% yield. Mp 154–156 °C.  $^1\text{H}$  NMR (400 MHz,  $\text{CDCl}_3$ )  $\delta$  8.15–8.13 (m, 2H), 8.08–8.06 (m, 2H), 7.60–7.56 (m, 2H), 7.50–7.44 (m, 4H), 7.31–7.29 (m, 2H), 7.13–7.11 (m, 2H), 6.92 (d,  $J = 16.0$  Hz, 1H), 6.70 (d,  $J = 7.6$  Hz, 1H), 6.40 (dd,  $J = 16.0$  and 7.6 Hz, 1H);  $^{13}\text{C}$  NMR (100 MHz,  $\text{CDCl}_3$ )  $\delta$  194.2, 166.0, 138.9, 137.0, 134.9, 133.8, 133.5, 133.0, 130.1, 129.6, 129.5, 128.90, 128.89, 128.5, 126.9, 120.3, 76.9, 21.4; HRMS (ESI,  $m/z$ ): calcd. for  $\text{C}_{24}\text{H}_{21}\text{O}_3^+$  357.1485, found 357.1485; IR (KBr thin film,  $\text{cm}^{-1}$ ):  $\nu$  3059, 1718, 1698, 1449, 1272, 1109, 711.

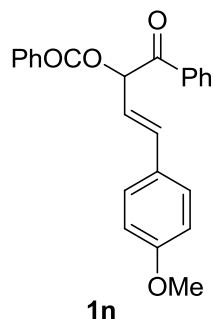

**(E)-4-(4-methoxyphenyl)-1-oxo-1-phenylbut-3-en-2-yl benzoate (1n):** White solid, 120.9 mg, 65% yield. Mp 116–117 °C.  $^1\text{H}$  NMR (400 MHz,  $\text{CDCl}_3$ )  $\delta$  8.14–8.13 (m, 2H), 8.09–8.07 (m, 2H), 7.59–7.56 (m, 2H), 7.50–7.43 (m, 4H), 7.35–7.33 (m, 2H),

6.91–6.84 (m, 3H), 6.69 (d,  $J = 7.8$  Hz, 1H), 6.31 (dd,  $J = 15.8$  and 7.8 Hz, 1H);  $^{13}\text{C}$  NMR (100 MHz,  $\text{CDCl}_3$ )  $\delta$  194.3, 166.1, 160.2, 136.8, 134.9, 133.8, 133.5, 130.1, 129.6, 128.95, 128.92, 128.6, 128.5, 128.4, 119.1, 114.2, 77.0, 55.5; HRMS (ESI,  $m/z$ ): calcd. for  $\text{C}_{24}\text{H}_{21}\text{O}_4^+$  373.1434, found 373.1433; IR (KBr thin film,  $\text{cm}^{-1}$ ):  $\nu$  3064, 1718, 1698, 1511, 1274, 1252, 710.

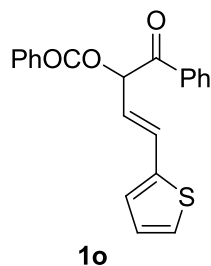

**(*E*)-1-oxo-1-phenyl-4-(thiophen-2-yl)but-3-en-2-yl benzoate (1o):** White solid, 132.2 mg, 76% yield. Mp 124–126 °C.  $^1\text{H}$  NMR (400 MHz,  $\text{CDCl}_3$ )  $\delta$  8.14–8.12 (m, 2H), 8.07–8.05 (m, 2H), 7.56–7.53 (m, 2H), 7.47–7.41 (m, 4H), 7.18–7.17 (m, 1H), 7.08–7.01 (m, 2H), 6.93–6.92 (m, 1H), 6.68 (d,  $J = 7.6$  Hz, 1H), 6.28 (dd,  $J = 15.7$  and 7.6 Hz, 1H);  $^{13}\text{C}$  NMR (100 MHz,  $\text{CDCl}_3$ )  $\delta$  193.8, 165.9, 140.6, 134.7, 133.8, 133.5, 130.0, 129.9, 129.4, 128.9, 128.8, 128.5, 127.7, 127.6, 125.9, 120.4, 76.3; HRMS (ESI,  $m/z$ ): calcd. for  $\text{C}_{21}\text{H}_{17}\text{O}_3\text{S}^+$  349.0893, found 349.0895; IR (KBr thin film,  $\text{cm}^{-1}$ ):  $\nu$  3066, 1719, 1698, 1450, 1275, 1109, 956, 708.

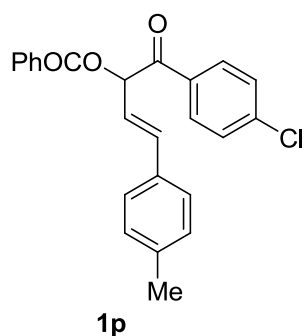

**(*E*)-1-(4-chlorophenyl)-1-oxo-4-p-tolylbut-3-en-2-yl benzoate (1p):** White solid, 152.1 mg, 78% yield. Mp 153–155 °C.  $^1\text{H}$  NMR (400 MHz,  $\text{CDCl}_3$ )  $\delta$  8.13–8.11 (m, 2H), 8.02–8.00 (m, 2H), 7.60–7.56 (m, 1H), 7.47–7.43 (m, 4H), 7.30–7.29 (m, 2H), 7.13–7.12 (m, 2H), 6.90 (d,  $J = 15.9$  Hz, 1H), 6.68 (d,  $J = 7.7$  Hz, 1H), 6.37 (dd,  $J = 15.9$  and 7.7 Hz, 1H);  $^{13}\text{C}$  NMR (100 MHz,  $\text{CDCl}_3$ )  $\delta$  193.2, 166.0, 140.3, 139.1, 137.4, 133.6, 133.2, 132.8, 130.3, 130.1, 129.6, 129.4, 129.3, 128.6, 127.0, 120.0,

76.9, 21.4; HRMS (ESI, m/z): calcd. for  $C_{24}H_{20}ClO_3^+$  391.1096, found 391.1098; IR (KBr thin film,  $cm^{-1}$ ):  $\nu$  3065, 1718, 1698, 1273, 1245, 1093, 709.

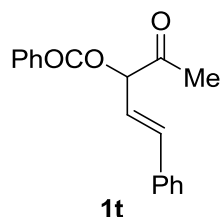

**(E)-1-(4-chlorophenyl)-1-oxo-4-p-tolylbut-3-en-2-yl benzoate (1t):** White solid, 65.8 mg, 47% yield. Mp 43–45 °C.  $^1H$  NMR (400 MHz,  $CDCl_3$ )  $\delta$  8.14–8.12 (m, 2H), 7.63–7.59 (m, 1H), 7.50–7.43 (m, 4H), 7.38–7.30 (m, 3H), 6.91 (d,  $J$  = 15.9 Hz, 1H), 6.31 (dd,  $J$  = 15.9 and 7.5 Hz, 1H), 5.86 (d,  $J$  = 7.5 Hz, 1H), 2.30 (s, 1H);  $^{13}C$  NMR (100 MHz,  $CDCl_3$ )  $\delta$  202.7, 165.9, 136.3, 135.7, 133.7, 130.1, 129.4, 128.91, 128.89, 128.7, 127.0, 120.8, 80.4, 26.3; HRMS (ESI, m/z): calcd. for  $C_{18}H_{17}O_3^+$  281.1172, found 281.1166; IR (KBr thin film,  $cm^{-1}$ ):  $\nu$  1720, 1272, 1111, 746, 712, 693.

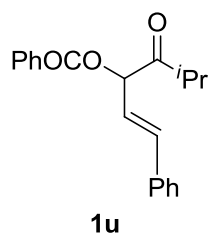

**(E)-5-methyl-4-oxo-1-phenylhex-1-en-3-yl benzoate (1u):** Yellow oil, 117.0 mg, 76% yield.  $^1H$  NMR (400 MHz,  $CDCl_3$ )  $\delta$  8.14–8.11 (m, 2H), 7.60–7.56 (m, 1H), 7.48–7.42 (m, 4H), 7.37–7.30 (m, 3H), 6.91 (d,  $J$  = 15.9 Hz, 1H), 6.31 (dd,  $J$  = 15.9 and 7.8 Hz, 1H), 6.01 (dd,  $J$  = 7.8 and 1.1 Hz, 1H), 3.03–2.96 (m, 1H), 1.26 (d,  $J$  = 7.0 Hz, 3H), 1.11 (d,  $J$  = 6.8 Hz, 3H);  $^{13}C$  NMR (100 MHz,  $CDCl_3$ )  $\delta$  208.4, 165.8, 136.5, 135.7, 133.5, 130.0, 129.6, 128.9, 128.8, 128.6, 127.0, 121.2, 79.0, 37.4, 19.1, 18.1; HRMS (ESI, m/z): calcd. for  $C_{20}H_{21}O_3^+$  309.1485, found 309.1488; IR (KBr thin film,  $cm^{-1}$ ):  $\nu$  2926, 2854, 1718, 1456, 1269, 1108, 710.

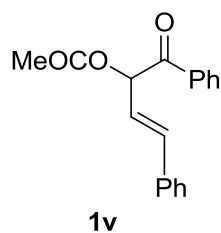

**(E)-1-oxo-1,4-diphenylbut-3-en-2-yl acetate (1v):** Yellow oil, 105.0 mg, 75% yield.

$^1\text{H}$  NMR (400 MHz,  $\text{CDCl}_3$ )  $\delta$  8.02–8.00 (m, 2H), 7.59–7.55 (m, 1H), 7.49–7.44 (m, 2H), 7.37–7.24 (m, 5H), 6.86 (d,  $J$  = 15.9 Hz, 1H), 6.49 (d,  $J$  = 7.6 Hz, 1H), 6.31 (d,  $J$  = 15.9 and 7.6 Hz, 1H), 2.20 (s, 3H);  $^{13}\text{C}$  NMR (100 MHz,  $\text{CDCl}_3$ )  $\delta$  194.2, 170.4, 136.8, 135.7, 134.8, 133.8, 128.91, 128.86, 128.82, 128.79, 127.0, 121.3, 76.3, 20.9; HRMS (ESI,  $m/z$ ): calcd. for  $\text{C}_{18}\text{H}_{17}\text{O}_3^+$  281.1172, found 281.1171; IR (KBr thin film,  $\text{cm}^{-1}$ ):  $\nu$  3064, 2926, 1735, 1699, 1450, 1230, 699.

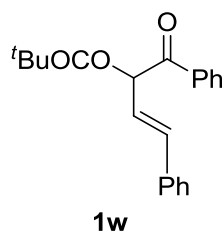

**(*E*)-1-oxo-1,4-diphenylbut-3-en-2-yl pivalate (1w):** White solid, 112.7 mg, 70% yield. Mp 64–66 °C.  $^1\text{H}$  NMR (400 MHz,  $\text{CDCl}_3$ )  $\delta$  8.00–8.00 (m, 2H), 7.59–7.55 (m, 1H), 7.48–7.44 (m, 2H), 7.38–7.36 (m, 2H), 7.33–7.27 (m, 3H), 6.84 (d,  $J$  = 15.7 Hz, 1H), 6.42 (d,  $J$  = 7.4 Hz, 1H), 6.33 (d,  $J$  = 15.7 and 7.4 Hz, 1H), 1.27 (s, 9H);  $^{13}\text{C}$  NMR (100 MHz,  $\text{CDCl}_3$ )  $\delta$  194.6, 177.9, 136.2, 135.9, 135.0, 133.7, 128.9, 128.8, 128.7, 127.0, 121.6, 76.3, 38.9, 27.2; HRMS (ESI,  $m/z$ ): calcd. for  $\text{C}_{21}\text{H}_{23}\text{O}_3^+$  323.1642, found 323.1643; IR (KBr thin film,  $\text{cm}^{-1}$ ):  $\nu$  2974, 1733, 1717, 1699, 1541, 1148.

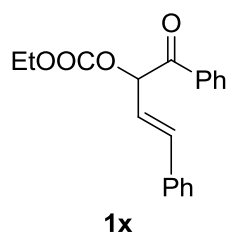

**(*E*)-ethyl 1-oxo-1,4-diphenylbut-3-en-2-yl carbonate (1x):** White solid, 97.7 mg, 63% yield. Mp 68–70 °C.  $^1\text{H}$  NMR (400 MHz,  $\text{CDCl}_3$ )  $\delta$  8.03–8.01 (m, 2H), 7.60–7.57 (m, 1H), 7.50–7.46 (m, 2H), 7.37–7.35 (m, 2H), 7.32–7.27 (m, 3H), 6.90 (d,  $J$  = 15.6 Hz, 1H), 6.39–6.28 (m, 2H), 4.23 (q,  $J$  = 7.1 Hz, 2H), 1.32 (t,  $J$  = 7.1 Hz, 3H);  $^{13}\text{C}$  NMR (100 MHz,  $\text{CDCl}_3$ )  $\delta$  193.9, 154.5, 137.1, 135.6, 134.6, 133.9, 129.0, 128.93, 128.90, 128.8, 127.0, 120.8, 79.0, 64.9, 14.3; HRMS (ESI,  $m/z$ ): calcd. for  $\text{C}_{19}\text{H}_{19}\text{O}_4^+$  311.1278, found 311.1278; IR (KBr thin film,  $\text{cm}^{-1}$ ):  $\nu$  2926, 1747, 1699, 1449, 1373, 1268, 699.

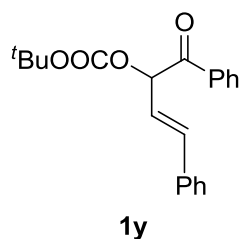

**(E)-tert-butyl 1-oxo-1,4-diphenylbut-3-en-2-yl carbonate (1y):** Yellow oil, 82.8 mg, 49% yield.  $^1\text{H}$  NMR (400 MHz,  $\text{CDCl}_3$ )  $\delta$  8.03–8.00 (m, 2H), 7.59–7.55 (m, 1H), 7.49–7.45 (m, 2H), 7.36–7.24 (m, 5H), 6.90–6.85 (m, 1H), 6.31–6.28 (m, 2H), 1.47 (s, 9H);  $^{13}\text{C}$  NMR (100 MHz,  $\text{CDCl}_3$ )  $\delta$  194.4, 152.8, 136.8, 135.7, 134.7, 133.8, 128.9, 128.8, 127.0, 121.0, 83.4, 78.6, 27.8; HRMS (ESI,  $m/z$ ): calcd. for  $\text{C}_{21}\text{H}_{23}\text{O}_4^+$  339.1591, found 339.1596; IR (KBr thin film,  $\text{cm}^{-1}$ ):  $\nu$  3064, 2925, 1717, 1698, 1685, 1596, 1559, 1450, 697.

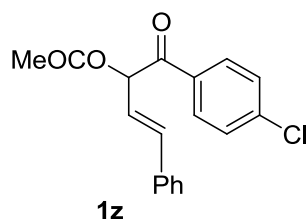

**(E)-1-(4-chlorophenyl)-1-oxo-4-phenylbut-3-en-2-yl acetate (1z):** Yellow oil, 128.7 mg, 82% yield.  $^1\text{H}$  NMR (400 MHz,  $\text{CDCl}_3$ )  $\delta$  7.95 (d,  $J = 7.8$  Hz, 2H), 7.45 (d,  $J = 7.9$  Hz, 2H), 7.38–7.26 (m, 5H), 6.85 (d,  $J = 15.9$  Hz, 1H), 6.41 (d,  $J = 7.7$  Hz, 1H), 6.28 (dd,  $J = 15.9$  and 7.7 Hz, 1H), 2.20 (s, 3H);  $^{13}\text{C}$  NMR (100 MHz,  $\text{CDCl}_3$ )  $\delta$  193.2, 170.4, 140.4, 137.2, 135.5, 133.1, 130.3, 129.3, 129.0, 128.9, 127.0, 120.9, 76.3, 20.9; HRMS (ESI,  $m/z$ ): calcd. for  $\text{C}_{16}\text{H}_{10}\text{O}_2\text{H}^+$  235.0754, found 235.0754; IR (KBr thin film,  $\text{cm}^{-1}$ ):  $\nu$  3064, 1735, 1698, 1684, 1229, 1092.

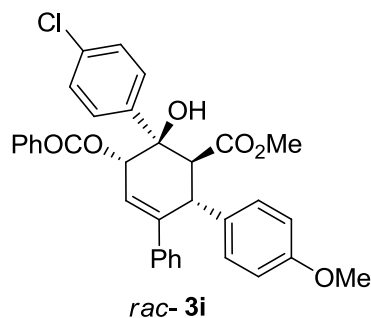

**(1S,4R,5S,6R)-6-(4-chlorophenyl)-6-hydroxy-5-(methoxycarbonyl)-4-(4-methoxyphenyl)-3-phenylcyclohex-2-enyl benzoate (*rac*-3i):** Yellow oil, 82.9 mg, 73% yield.

$^1\text{H}$  NMR (400 MHz,  $\text{CDCl}_3$ )  $\delta$  7.92–7.90 (m, 2H), 7.58–7.56 (m, 3H), 7.46–7.42 (m, 2H), 7.21–7.08 (m, 7H), 7.02–6.99 (m, 2H), 6.72–6.70 (m, 2H), 6.37 (dd,  $J = 5.6$  and 1.8 Hz, 1H), 5.47 (d,  $J = 5.7$  Hz, 1H), 4.50 (d,  $J = 10.0$  Hz, 1H), 4.30 (s, 1H), 3.77 (d,  $J = 10.2$  Hz, 1H), 3.71 (s, 3H), 3.35 (s, 3H);  $^{13}\text{C}$  NMR (100 MHz,  $\text{CDCl}_3$ )  $\delta$  175.9, 164.8, 158.4, 145.1, 141.3, 139.9, 134.0, 133.3, 132.9, 129.8, 129.6, 129.5, 128.6, 128.2, 128.1, 128.0, 127.4, 127.2, 122.6, 114.1, 74.4, 71.4, 55.2, 53.5, 52.0, 45.9; HRMS (ESI,  $m/z$ ): calcd. for  $\text{C}_{34}\text{H}_{30}\text{ClO}_6^+$  569.1725, found 569.1728; IR (KBr thin film,  $\text{cm}^{-1}$ ):  $\nu$  3497, 2926, 1719, 1511, 1261, 1175, 1095, 710.

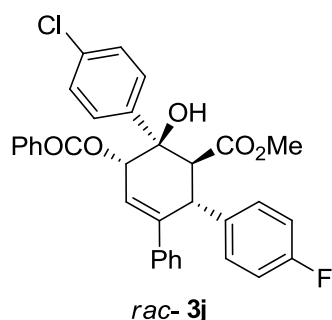

**(1S,4R,5S,6R)-6-(4-chlorophenyl)-4-(4-fluorophenyl)-6-hydroxy-5-(methoxycarbonyl)-3-phenylcyclohex-2-enyl benzoate (*rac*-3j)**: Yellow oil, 81.2 mg, 73% yield.  $^1\text{H}$  NMR (400 MHz,  $\text{CDCl}_3$ )  $\delta$  7.91–7.89 (m, 2H), 7.59–7.55 (m, 3H), 7.46–7.43 (m, 2H), 7.20–7.04 (m, 9H), 6.89–6.85 (m, 2H), 6.39 (dd,  $J = 5.7$  and 2.1 Hz, 1H), 5.47 (d,  $J = 5.8$  Hz, 1H), 4.55 (d,  $J = 10.1$  Hz, 1H), 4.28 (s, 1H), 3.75 (d,  $J = 10.3$  Hz, 1H), 3.35 (s, 3H);  $^{13}\text{C}$  NMR (100 MHz,  $\text{CDCl}_3$ )  $\delta$  175.6, 164.8, 161.6 (d,  $J = 244.1$  Hz), 144.5, 141.1, 139.6, 136.7 (d,  $J = 3.3$  Hz), 134.0, 133.4, 130.0 (d,  $J = 8.0$  Hz), 129.7, 129.6, 128.6, 128.2, 128.1, 128.0, 127.6, 127.1, 122.9, 115.7 (d,  $J = 21.4$  Hz), 74.4, 71.3, 53.4, 52.0, 46.0; HRMS (ESI,  $m/z$ ): calcd. for  $\text{C}_{33}\text{H}_{27}\text{ClFO}_5^+$  557.1526, found 557.1524; IR (KBr thin film,  $\text{cm}^{-1}$ ):  $\nu$  3504, 2927, 1720, 1509, 1262, 1095, 711.

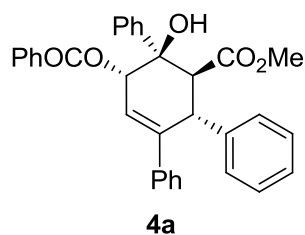

**(1S,4R,5S,6R)-6-hydroxy-5-(methoxycarbonyl)-3,4,6-triphenylcyclohex-2-enyl benzoate (4a)**: Yellow oil, 80.6 mg, 80% yield.  $^1\text{H}$  NMR (400 MHz,  $\text{CDCl}_3$ )  $\delta$

7.91–7.89 (m, 2H), 7.64–7.62 (m, 2H), 7.57–7.53 (m, 1H), 7.44–7.40 (m, 2H), 7.23–7.07 (m, 13H), 6.42 (dd,  $J = 5.7$  and  $2.0$  Hz, 1H), 5.51 (d,  $J = 5.7$  Hz, 1H), 4.57 (d,  $J = 10.2$  Hz, 1H), 4.29 (s, 1H), 3.85 (d,  $J = 10.3$  Hz, 1H), 3.32 (s, 3H);  $^{13}\text{C}$  NMR (100 MHz,  $\text{CDCl}_3$ )  $\delta$  176.0, 164.9, 144.8, 142.7, 141.2, 139.9, 133.2, 130.0, 129.7, 128.7, 128.6, 128.5, 128.1, 128.0, 127.4, 127.2, 127.0, 126.5, 123.0, 74.7, 71.7, 53.5, 51.8, 46.9; HRMS (ESI,  $m/z$ ): calcd. for  $\text{C}_{33}\text{H}_{29}\text{O}_5^+$  505.2010, found 505.1995; IR (KBr thin film,  $\text{cm}^{-1}$ ):  $\nu$  3503, 3060, 3028, 2952, 1720, 1264, 1172, 1105, 701;  $[\alpha]_{\text{D}}^{29}$ : 9.0 ( $c$  0.7,  $\text{CHCl}_3$ ); HPLC analysis: 93% ee (Chiralcel AD-H, 10:90  $i$ PrOH/hexane, 1 mL/min, 254 nm),  $R_t$  (major) = 8.7 min,  $R_t$  (minor) = 18.8 min.

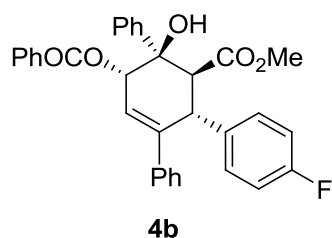

**(1S,4R,5S,6R)-4-(4-fluorophenyl)-6-hydroxy-5-(methoxycarbonyl)-3,6-diphenylcyclohex-2-enyl benzoate (4b):** Yellow oil, 66.8 mg, 89% yield.  $^1\text{H}$  NMR (400 MHz,  $\text{CDCl}_3$ )  $\delta$  7.90–7.88 (m, 2H), 7.63–7.53 (m, 3H), 7.44–7.39 (m, 2H), 7.22–7.05 (m, 10H), 6.89–6.85 (m, 2H), 6.41 (dd,  $J = 5.7$  and  $2.1$  Hz, 1H), 5.50 (d,  $J = 5.7$  Hz, 1H), 4.57 (d,  $J = 10.3$  Hz, 1H), 4.24 (s, 1H), 3.85 (d,  $J = 10.4$  Hz, 1H), 3.34 (s, 3H);  $^{13}\text{C}$  NMR (100 MHz,  $\text{CDCl}_3$ )  $\delta$  175.9, 164.9, 162.9, 160.4, 144.6, 142.5, 139.8, 137.0 (d,  $J = 3.2$  Hz), 133.2, 130.1, 130.04, 129.97, 129.7, 128.5, 128.1, 127.5, 127.2, 126.5, 123.2, 115.7 (d,  $J = 21.3$  Hz), 77.4, 73.1 (d,  $J = 306.7$  Hz), 53.5, 51.9, 46.1; HRMS (ESI,  $m/z$ ): calcd. for  $\text{C}_{33}\text{H}_{27}\text{FO}_5\text{Na}^+$  545.1735, found 545.1734; IR (KBr thin film,  $\text{cm}^{-1}$ ):  $\nu$  3502, 3061, 2954, 2926, 1720, 1509, 1264, 1096, 701;  $[\alpha]_{\text{D}}^{31}$ : 11.7 ( $c$  1.2,  $\text{CHCl}_3$ ); HPLC analysis: 89% ee (Chiralcel AD-H, 10:90  $i$ PrOH/hexane, 1 mL/min, 254 nm),  $R_t$  (major) = 9.4 min,  $R_t$  (minor) = 12.7 min.

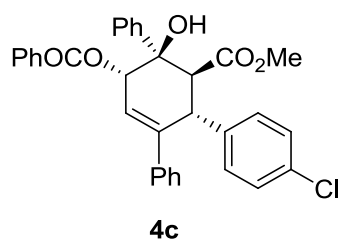

**(1S,4R,5S,6R)-4-(4-chlorophenyl)-6-hydroxy-5-(methoxycarbonyl)-3,6-diphenylcyclohex-2-enyl benzoate (4c):**

**cyclohex-2-enyl benzoate (4c)**: Yellow oil, 86.1 mg, 80% yield.  $^1\text{H}$  NMR (400 MHz,  $\text{CDCl}_3$ )  $\delta$  7.83–7.81 (m, 2H), 7.56–7.47 (m, 3H), 7.37–7.33 (m, 2H), 7.19–6.96 (m, 12H), 6.35 (dd,  $J = 5.7$  and  $2.0$  Hz, 1H), 5.42 (d,  $J = 5.6$  Hz, 1H), 4.49 (d,  $J = 10.4$  Hz, 1H), 4.16 (s, 1H), 3.72 (d,  $J = 10.3$  Hz, 1H), 3.28 (s, 3H);  $^{13}\text{C}$  NMR (100 MHz,  $\text{CDCl}_3$ )  $\delta$  175.8, 164.9, 144.3, 142.4, 139.9, 139.7, 133.2, 132.7, 130.0, 129.9, 129.7, 129.0, 128.5, 128.2, 128.1, 127.6, 127.1, 126.5, 123.4, 74.6, 71.6, 53.4, 52.0 46.3; HRMS (ESI,  $m/z$ ): calcd. for  $\text{C}_{33}\text{H}_{27}\text{ClO}_5\text{Na}^+$  561.1439, found 561.1440; IR (KBr thin film,  $\text{cm}^{-1}$ ):  $\nu$  3503, 2925, 1719, 1262, 1094, 701;  $[\alpha]_{\text{D}}^{32}$ : 17.1 ( $c$  1.9,  $\text{CHCl}_3$ ); HPLC analysis: 91% ee (Chiralcel AD-H, 10:90  $i$ PrOH/hexane, 1 mL/min, 254 nm),  $R_t$  (major) = 6.5 min,  $R_t$  (minor) = 7.4 min.

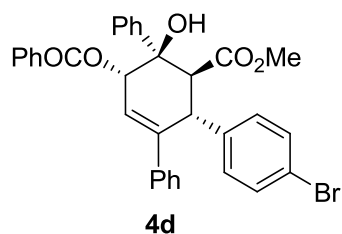

**(1S,4R,5S,6R)-4-(4-bromophenyl)-6-hydroxy-5-(methoxycarbonyl)-3,6-diphenylcyclohex-2-enyl benzoate (4d)**: Yellow solid, 74.5 mg, 64% yield. Mp 62–63 °C.  $^1\text{H}$  NMR (400 MHz,  $\text{CDCl}_3$ )  $\delta$  7.90–7.88 (m, 2H), 7.63–7.53 (m, 3H), 7.44–7.36 (m, 2H), 7.31–7.29 (m, 2H), 7.25–7.12 (m, 8H), 7.00–6.84 (m, 2H), 6.42 (d,  $J = 4.5$  Hz, 1H), 5.50 (d,  $J = 5.3$  Hz, 1H), 4.55 (d,  $J = 9.5$  Hz, 1H), 4.24 (s, 1H), 3.79 (d,  $J = 10.2$  Hz, 1H), 3.35 (s, 3H);  $^{13}\text{C}$  NMR (100 MHz,  $\text{CDCl}_3$ )  $\delta$  175.8, 164.9, 144.1, 142.4, 140.4, 139.6, 133.2, 131.9, 130.3, 129.9, 129.7, 128.5, 128.2, 128.1, 127.6, 127.1, 126.4, 123.4, 120.8, 74.6, 71.5, 53.3, 52.0 46.3; HRMS (ESI,  $m/z$ ): calcd. for  $\text{C}_{33}\text{H}_{27}\text{BrO}_5\text{Na}^+$  605.0934, found 605.0934; IR (KBr thin film,  $\text{cm}^{-1}$ ):  $\nu$  2923, 2853, 1718, 1448, 1095, 1262, 700;  $[\alpha]_{\text{D}}^{29}$ : 8.7 ( $c$  4.2,  $\text{CHCl}_3$ ); HPLC analysis: 90% ee (Chiralcel AD-H, 10:90  $i$ PrOH/hexane, 1 mL/min, 254 nm),  $R_t$  (major) = 6.7 min,  $R_t$  (minor) = 7.6 min.

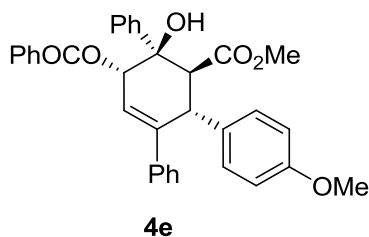

**(1S,4R,5S,6R)-6-hydroxy-5-(methoxycarbonyl)-4-(4-methoxyphenyl)-3,6-diphenylcyclohex-2-enyl benzoate (4e):** Yellow oil, 64.1 mg, 60% yield.  $^1\text{H}$  NMR (400 MHz,  $\text{CDCl}_3$ )  $\delta$  7.91–7.89 (m, 2H), 7.64–7.53 (m, 3H), 7.44–7.40 (m, 2H), 7.22–7.01 (m, 10H), 6.72–6.70 (m, 2H), 6.39 (dd,  $J = 5.6$  and  $2.0$  Hz, 1H), 5.49 (d,  $J = 5.6$  Hz, 1H), 4.52 (d,  $J = 10.1$  Hz, 1H), 4.27 (s, 1H), 3.82 (d,  $J = 10.3$  Hz, 1H), 3.71 (s, 3H), 3.34 (s, 3H);  $^{13}\text{C}$  NMR (100 MHz,  $\text{CDCl}_3$ )  $\delta$  176.1, 164.9, 158.3, 145.1, 142.7, 140.0, 133.1, 130.0, 129.7, 129.5, 128.5, 128.1, 128.0, 127.3, 127.2, 126.5, 122.8, 114.1, 74.7, 71.7, 55.2, 53.6, 51.9, 46.0; HRMS (ESI,  $m/z$ ): calcd. for  $\text{C}_{34}\text{H}_{30}\text{O}_6\text{Na}^+$  557.1935, found 557.1935; IR (KBr thin film,  $\text{cm}^{-1}$ ):  $\nu$  3502, 2928, 1719, 1511, 1261, 701;  $[\alpha]_D^{31}$ : 8.5 ( $c$  2.5,  $\text{CHCl}_3$ ); HPLC analysis: 97% ee (Chiralcel AD-H, 10:90  $i$ PrOH/hexane, 1 mL/min, 254 nm),  $R_t$  (major) = 10.8 min,  $R_t$  (minor) = 14.3 min.

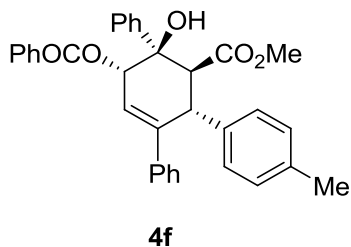

**(1S,4R,5S,6R)-6-hydroxy-5-(methoxycarbonyl)-3,6-diphenyl-4-p-tolylcyclohex-2-enyl benzoate (4f):** Yellow oil, 59.1 mg, 57% yield.  $^1\text{H}$  NMR (400 MHz,  $\text{CDCl}_3$ )  $\delta$  7.84–7.82 (m, 2H), 7.56–7.46 (m, 3H), 7.36–7.32 (m, 2H), 7.18–6.99 (m, 8H), 6.93–6.89 (m, 4H), 6.34 (dd,  $J = 5.7$  and  $1.9$  Hz, 1H), 5.42 (d,  $J = 5.7$  Hz, 1H), 4.46 (d,  $J = 9.7$  Hz, 1H), 4.21 (s, 1H), 3.76 (d,  $J = 10.2$  Hz, 1H), 3.27 (s, 3H), 2.15 (s, 3H);  $^{13}\text{C}$  NMR (100 MHz,  $\text{CDCl}_3$ )  $\delta$  176.1, 164.9, 145.0, 142.7, 140.0, 138.1, 136.4, 133.1, 130.1, 129.7, 129.5, 128.5, 128.4, 128.1, 128.0, 127.4, 127.2, 126.5, 122.9, 74.6, 71.7, 53.6, 51.9, 46.4, 21.2; HRMS (ESI,  $m/z$ ): calcd. for  $\text{C}_{34}\text{H}_{30}\text{O}_5\text{Na}^+$  541.1986, found 541.1986; IR (KBr thin film,  $\text{cm}^{-1}$ ):  $\nu$  2925, 1719, 1263, 1171, 1096, 752, 700;  $[\alpha]_D^{30}$ : 4.9 ( $c$  1.4,  $\text{CHCl}_3$ ); HPLC analysis: 97% ee (Chiralcel AD-H, 10:90  $i$ PrOH/hexane, 1

mL/min, 254 nm),  $R_t$  (major) = 7.4 min,  $R_t$  (minor) = 10.8 min.

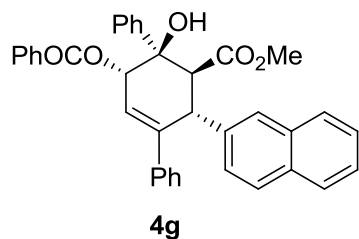

**(1S,4R,5S,6R)-6-hydroxy-5-(methoxycarbonyl)-4-(naphthalen-2-yl)-3,6-diphenylcyclohex-2-enyl benzoate (4g):** Yellow oil, 70.9 mg, 64% yield.  $^1\text{H}$  NMR (400 MHz,  $\text{CDCl}_3$ )  $\delta$  7.94–7.92 (m, 2H), 7.71–7.63 (m, 5H), 7.58–7.54 (m, 2H), 7.45–7.39 (m, 4H), 7.28–7.15 (m, 6H), 7.09–7.00 (m, 3H), 6.48 (d,  $J$  = 4.0 Hz, 1H), 5.54 (d,  $J$  = 5.6 Hz, 1H), 4.76 (d,  $J$  = 10.1 Hz, 1H), 4.35 (s, 1H), 3.95 (d,  $J$  = 10.2 Hz, 1H), 3.22 (s, 3H);  $^{13}\text{C}$  NMR (100 MHz,  $\text{CDCl}_3$ )  $\delta$  176.1, 165.0, 144.7, 142.6, 139.8, 138.7, 133.5, 133.2, 132.4, 130.0, 129.7, 129.3, 129.1, 128.8, 128.5, 128.1, 128.0, 127.8, 127.7, 127.4, 127.2, 126.5, 126.2, 126.0, 125.8, 123.2, 74.7, 71.7, 53.3, 51.9, 47.0; HRMS (ESI,  $m/z$ ): calcd. for  $\text{C}_{37}\text{H}_{30}\text{O}_5\text{Na}^+$  577.1986, found 577.1981; IR (KBr thin film,  $\text{cm}^{-1}$ ):  $\nu$  3504, 2925, 1719, 1263, 1096, 1068, 752, 700;  $[\alpha]_D^{30}$ : -22.2 ( $c$  2.1,  $\text{CHCl}_3$ ); HPLC analysis: 99% ee (Chiralcel AD-H, 10:90  $i$ PrOH/hexane, 1 mL/min, 254 nm),  $R_t$  (major) = 7.7 min,  $R_t$  (minor) = 10.1 min.

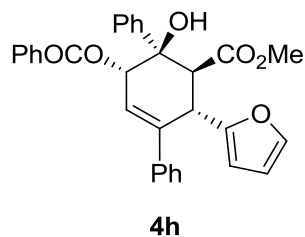

**(1S,4S,5S,6R)-4-(furan-2-yl)-6-hydroxy-5-(methoxycarbonyl)-3,6-diphenylcyclohex-2-enyl benzoate (4h):** Yellow oil, 42.5 mg, 43% yield.  $^1\text{H}$  NMR (400 MHz,  $\text{CDCl}_3$ )  $\delta$  7.89–7.87 (m, 2H), 7.65–7.64 (m, 2H), 7.55–7.51 (m, 1H), 7.42–7.38 (m, 2H), 7.25–7.16 (m, 9H), 6.28 (dd,  $J$  = 5.4 and 2.3 Hz, 1H), 6.13 (s, 1H), 5.99 (d,  $J$  = 2.8 Hz, 1H), 5.47 (d,  $J$  = 5.4 Hz, 1H), 4.68 (d,  $J$  = 10.7 Hz, 1H), 4.25 (s, 1H), 4.09 (d,  $J$  = 10.7 Hz, 1H), 3.42 (s, 3H);  $^{13}\text{C}$  NMR (100 MHz,  $\text{CDCl}_3$ )  $\delta$  175.8, 164.9, 152.9, 142.9, 142.5, 142.1, 139.7, 133.1, 129.9, 129.7, 128.4, 128.12, 128.09, 128.0, 127.6, 126.9, 126.5, 122.7, 110.3, 108.6, 74.6, 71.4, 52.1, 50.0, 40.6; HRMS (ESI,  $m/z$ ): calcd. for  $\text{C}_{31}\text{H}_{26}\text{O}_6\text{Na}^+$  517.1622, found 517.1627; IR (KBr thin film,  $\text{cm}^{-1}$ ):  $\nu$  3503, 2926, 1719,

1262, 1096, 701;  $[\alpha]_D^{29}$ : 13.6 (*c* 1.0, CHCl<sub>3</sub>); HPLC analysis: 73% ee (Chiralcel AD-H, 10:90 *i*PrOH/hexane, 1 mL/min, 254 nm),  $R_t$  (major) = 9.5 min,  $R_t$  (minor) = 21.0 min.

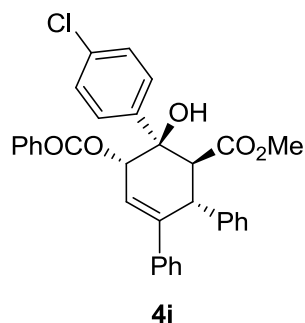

**(1*S*,4*R*,5*S*,6*R*)-6-(4-chlorophenyl)-6-hydroxy-5-(methoxycarbonyl)-3,4-diphenylcyclohex-2-enyl benzoate (4i)**: Yellow oil, 81.8 mg, 76% yield. <sup>1</sup>H NMR (400 MHz, CDCl<sub>3</sub>)  $\delta$  7.92–7.91 (m, 2H), 7.60–7.56 (m, 3H), 7.47–7.43 (m, 2H), 7.22–7.07 (m, 12H), 6.40 (dd, *J* = 5.7 and 2.0 Hz, 1H), 5.48 (d, *J* = 5.6 Hz, 1H), 4.55 (d, *J* = 10.0 Hz, 1H), 4.32 (s, 1H), 3.79 (d, *J* = 10.3 Hz, 1H), 3.35 (s, 3H); <sup>13</sup>C NMR (100 MHz, CDCl<sub>3</sub>)  $\delta$  175.9, 164.9, 144.8, 141.3, 141.0, 139.8, 134.0, 133.3, 129.8, 129.7, 128.8, 128.6, 128.5, 128.2, 128.1, 127.5, 127.2, 127.1, 122.7, 74.4, 71.4, 53.4, 52.0, 46.8; HRMS (ESI, *m/z*): calcd. for C<sub>33</sub>H<sub>2</sub>ClO<sub>5</sub>Na<sup>+</sup> 561.1439, found 561.1443; IR (KBr thin film, cm<sup>-1</sup>):  $\nu$  3497, 2924, 1721, 1262, 1095, 709;  $[\alpha]_D^{31}$ : 3.8 (*c* 2.1, CHCl<sub>3</sub>); HPLC analysis: 81% ee (Chiralcel AD-H, 10:90 *i*PrOH/hexane, 1 mL/min, 254 nm),  $R_t$  (major) = 6.5 min,  $R_t$  (minor) = 15.3 min.

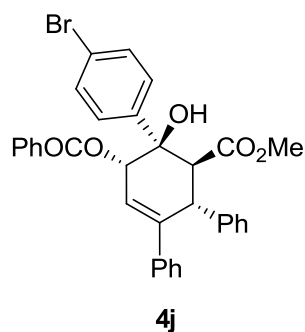

**(1*S*,4*R*,5*S*,6*R*)-6-(4-bromophenyl)-6-hydroxy-5-(methoxycarbonyl)-3,4-diphenylcyclohex-2-enyl benzoate (4j)**: Yellow oil, 89.6 mg, 77% yield. <sup>1</sup>H NMR (400 MHz, CDCl<sub>3</sub>)  $\delta$  7.92–7.90 (m, 2H), 7.59–7.50 (m, 3H), 7.46–7.42 (m, 2H), 7.34–7.32 (m, 2H), 7.22–7.06 (m, 10H), 6.40 (d, *J* = 5.4 Hz, 1H), 5.48 (d, *J* = 5.6 Hz, 1H), 4.54 (d, *J* = 10.1 Hz, 1H), 4.32 (s, 1H), 3.79 (d, *J* = 10.2 Hz, 1H), 3.33 (s, 3H); <sup>13</sup>C NMR (100

MHz, CDCl<sub>3</sub>)  $\delta$  175.8, 164.8, 144.8, 141.9, 141.0, 139.8, 133.3, 131.2, 129.9, 129.6, 128.8, 128.6, 128.5, 128.4, 128.1, 127.5, 127.2, 127.1, 122.7, 122.3, 74.5, 71.4, 53.4, 52.0, 46.9; HRMS (ESI, m/z): calcd. for C<sub>33</sub>H<sub>27</sub>BrO<sub>5</sub>Na<sup>+</sup> 605.0934, found 605.0935; IR (KBr thin film, cm<sup>-1</sup>):  $\nu$  3497, 2954, 2927, 1720, 1262, 1095, 710; [ $\alpha$ ]<sub>D</sub><sup>30</sup>: 7.1 (*c* 2.5, CHCl<sub>3</sub>); HPLC analysis: 83% ee (Chiralcel AD-H, 10:90 *i*PrOH/hexane, 1 mL/min, 254 nm), *R*<sub>t</sub> (major) = 7.2 min, *R*<sub>t</sub> (minor) = 17.6 min.

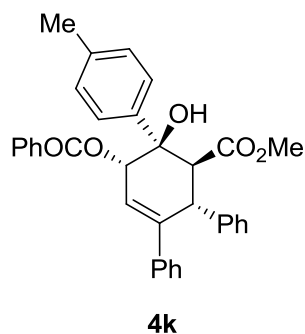

**(1*S*,4*R*,5*S*,6*R*)-6-hydroxy-5-(methoxycarbonyl)-3,4-diphenyl-6-p-tolylcyclohex-2-enyl benzoate (4k)**: Yellow oil, 57.0 mg, 55% yield. <sup>1</sup>H NMR (400 MHz, CDCl<sub>3</sub>)  $\delta$  7.93–7.91 (m, 2H), 7.57–7.49 (m, 3H), 7.44–7.41 (m, 2H), 7.22–7.00 (m, 12H), 6.42 (d, *J* = 5.2 Hz, 1H), 5.47 (d, *J* = 5.7 Hz, 1H), 4.55 (d, *J* = 10.1 Hz, 1H), 4.22 (s, 1H), 3.83 (d, *J* = 10.3 Hz, 1H), 3.33 (s, 3H), 2.21 (s, 3H); <sup>13</sup>C NMR (100 MHz, CDCl<sub>3</sub>)  $\delta$  176.0, 165.0, 144.8, 141.3, 140.0, 139.7, 137.6, 133.1, 130.2, 129.7, 128.8, 128.7, 128.6, 128.5, 128.0, 127.4, 127.2, 126.9, 126.4, 123.1, 74.5, 71.8, 53.6, 51.8, 47.0, 21.1; HRMS (ESI, m/z): calcd. for C<sub>34</sub>H<sub>31</sub>O<sub>5</sub><sup>+</sup> 519.2166, found 519.2177; IR (KBr thin film, cm<sup>-1</sup>):  $\nu$  3504, 2925, 1719, 1264, 1106, 711; [ $\alpha$ ]<sub>D</sub><sup>31</sup>: -8.5 (*c* 1.7, CHCl<sub>3</sub>); HPLC analysis: 91% ee (Chiralcel AD-H, 10:90 *i*PrOH/hexane, 1 mL/min, 254 nm), *R*<sub>t</sub> (major) = 6.2 min, *R*<sub>t</sub> (minor) = 13.0 min.

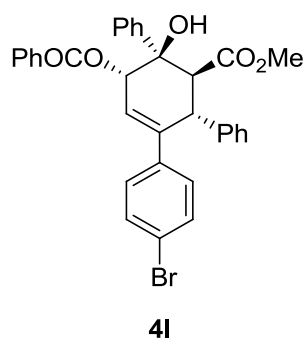

**(1*S*,4*R*,5*S*,6*R*)-3-(4-bromophenyl)-6-hydroxy-5-(methoxycarbonyl)-4,6-diphenylc**

**cyclohex-2-enyl benzoate (4l)**: Yellow oil, 89.6 mg, 77% yield.  $^1\text{H}$  NMR (400 MHz,  $\text{CDCl}_3$ )  $\delta$  7.90–7.88 (m, 2H), 7.63–7.61 (m, 2H), 7.56–7.53 (m, 1H), 7.43–7.39 (m, 2H), 7.25–7.08 (m, 12H), 6.42 (d,  $J = 5.6$  Hz, 1H), 5.48 (d,  $J = 5.7$  Hz, 1H), 4.51 (d,  $J = 10.2$  Hz, 1H), 4.28 (s, 1H), 3.84 (d,  $J = 10.3$  Hz, 1H), 3.31 (s, 3H);  $^{13}\text{C}$  NMR (100 MHz,  $\text{CDCl}_3$ )  $\delta$  175.9, 164.9, 143.8, 142.5, 140.8, 138.9, 133.2, 131.2, 129.9, 129.7, 128.9, 128.8, 128.53, 128.50, 128.1, 127.2, 126.5, 123.6, 121.4, 74.6, 71.5, 53.4, 51.9, 46.8; HRMS (ESI,  $m/z$ ): calcd. for  $\text{C}_{33}\text{H}_{28}\text{BrO}_5^+$  605.0934, found 605.0933; IR (KBr thin film,  $\text{cm}^{-1}$ ):  $\nu$  3503, 3062, 3028, 2952, 1717, 1316, 1263, 704;  $[\alpha]_{\text{D}}^{31}$ : -28.2 ( $c$  1.3,  $\text{CHCl}_3$ ); HPLC analysis: 95% ee (Chiralcel AD-H, 10:90  $i$ PrOH/hexane, 1 mL/min, 254 nm),  $R_t$  (major) = 11.2 min,  $R_t$  (minor) = 14.6 min.

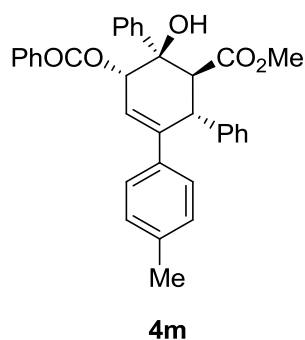

**(1S,4R,5S,6R)-6-hydroxy-5-(methoxycarbonyl)-4,6-diphenyl-3-p-tolylcyclohex-2-enyl benzoate (4m)**: Yellow oil, 76.7 mg, 74% yield.  $^1\text{H}$  NMR (400 MHz,  $\text{CDCl}_3$ )  $\delta$  7.91–7.89 (m, 2H), 7.64–7.62 (m, 2H), 7.56–7.52 (m, 1H), 7.43–7.39 (m, 2H), 7.25–7.09 (m, 10H), 6.92–6.90 (m, 2H), 6.39 (dd,  $J = 7.8$  and 2.1 Hz, 1H), 5.50 (d,  $J = 5.8$  Hz, 1H), 4.55 (d,  $J = 10.3$  Hz, 1H), 4.27 (s, 1H), 3.84 (d,  $J = 10.3$  Hz, 1H), 3.32 (s, 3H), 2.19 (s, 3H);  $^{13}\text{C}$  NMR (100 MHz,  $\text{CDCl}_3$ )  $\delta$  176.1, 164.9, 144.6, 142.7, 141.5, 137.1, 137.0, 133.1, 130.1, 129.7, 128.8, 128.7, 128.6, 128.5, 128.1, 128.0, 127.0, 126.9, 126.5, 122.3, 74.6, 71.8, 53.6, 51.8, 46.9, 21.2; HRMS (ESI,  $m/z$ ): calcd. for  $\text{C}_{34}\text{H}_{30}\text{O}_5\text{Na}^+$  541.1986, found 541.1986; IR (KBr thin film,  $\text{cm}^{-1}$ ):  $\nu$  3503, 3027, 2952, 1720, 1451, 1263, 1105, 703;  $[\alpha]_{\text{D}}^{30}$ : -13.7 ( $c$  1.9,  $\text{CHCl}_3$ ); HPLC analysis: 87% ee (Chiralcel AD-H, 10:90  $i$ PrOH/hexane, 1 mL/min, 254 nm),  $R_t$  (major) = 9.1 min,  $R_t$  (minor) = 14.3 min.

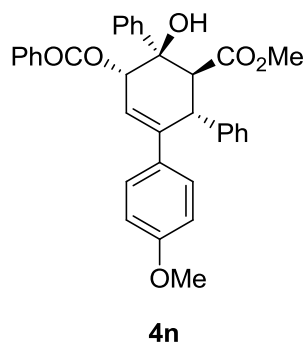

**(1*S*,4*R*,5*S*,6*R*)-6-hydroxy-5-(methoxycarbonyl)-3-(4-methoxyphenyl)-4,6-diphenylcyclohex-2-enyl benzoate (4n):** Yellow oil, 70.5 mg, 66% yield.  $^1\text{H}$  NMR (400 MHz,  $\text{CDCl}_3$ )  $\delta$  7.91–7.88 (m, 2H), 7.64–7.62 (m, 2H), 7.54–7.52 (m, 1H), 7.43–7.39 (m, 2H), 7.22–7.10 (m, 10H), 6.66–6.63 (m, 2H), 6.37 (dd,  $J = 5.8$  and 2.1 Hz, 1H), 5.49 (d,  $J = 5.8$  Hz, 1H), 4.52 (d,  $J = 10.2$  Hz, 1H), 4.27 (s, 1H), 3.84 (d,  $J = 10.3$  Hz, 1H), 3.68 (s, 3H), 3.32 (s, 3H);  $^{13}\text{C}$  NMR (100 MHz,  $\text{CDCl}_3$ )  $\delta$  176.1, 165.0, 158.9, 144.2, 142.7, 141.6, 133.1, 132.4, 130.1, 129.7, 128.7, 128.6, 128.5, 128.3, 128.1, 128.0, 126.9, 126.5, 121.7, 113.4, 74.6, 71.8, 55.2, 53.6, 51.8, 46.9; HRMS (ESI,  $m/z$ ): calcd. for  $\text{C}_{34}\text{H}_{31}\text{O}_6^+$  535.2115, found 535.2122; IR (KBr thin film,  $\text{cm}^{-1}$ ):  $\nu$  3503, 2954, 1719, 1513, 1250, 1175, 703;  $[\alpha]_{\text{D}}^{31}$ : -21.7 ( $c$  1.1,  $\text{CHCl}_3$ ); HPLC analysis: 93% ee (Chiralcel AD-H, 10:90  $i$ PrOH/hexane, 1 mL/min, 254 nm),  $R_t$  (major) = 11.3 min,  $R_t$  (minor) = 14.8 min.

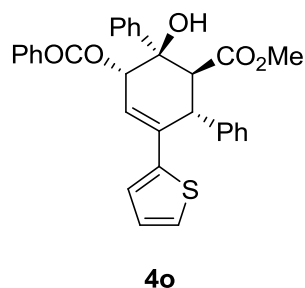

**(1*S*,4*R*,5*S*,6*R*)-6-hydroxy-5-(methoxycarbonyl)-4,6-diphenyl-3-(thiophen-2-yl)cyclohex-2-enyl benzoate (4o):** Yellow oil, 85.7 mg, 84% yield.  $^1\text{H}$  NMR (400 MHz,  $\text{CDCl}_3$ )  $\delta$  7.90–7.88 (m, 2H), 7.63–7.60 (m, 2H), 7.52–7.50 (m, 1H), 7.41–7.37 (m, 2H), 7.31–7.12 (m, 8H), 7.01–6.99 (m, 1H), 6.73–6.68 (m, 2H), 6.62 (dd,  $J = 6.0$  and 1.9 Hz, 1H), 5.51 (d,  $J = 6.0$  Hz, 1H), 4.40 (d,  $J = 10.1$  Hz, 1H), 4.24 (s, 1H), 3.88 (d,  $J = 10.2$  Hz, 1H), 3.33 (s, 3H);  $^{13}\text{C}$  NMR (100 MHz,  $\text{CDCl}_3$ )  $\delta$  175.7, 164.9, 142.7,

142.3, 141.8, 138.1, 133.1, 129.9, 129.6, 129.0, 128.5, 128.4, 128.0, 127.4, 127.0, 126.5, 126.3, 124.8, 121.8, 74.4, 71.8, 53.8, 51.8, 47.4; HRMS (ESI,  $m/z$ ): calcd. for  $C_{31}H_{26}O_5SNa^+$  533.1393, found 533.1400; IR (KBr thin film,  $cm^{-1}$ ):  $\nu$  3503, 3062, 2953, 1720, 1263, 1095, 702;  $[\alpha]_D^{31}$ : 8.2 ( $c$  4.5,  $CHCl_3$ ); HPLC analysis: 97% ee (Chiralcel AD-H, 10:90  $i$ PrOH/hexane, 1 mL/min, 254 nm),  $R_t$  (major) = 10.9 min,  $R_t$  (minor) = 30.3 min.

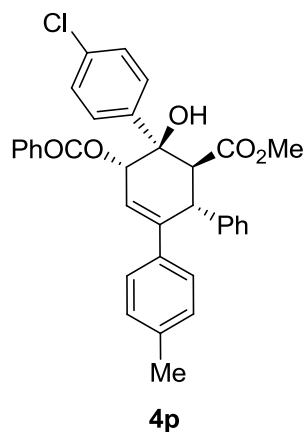

**(1*S*,4*R*,5*S*,6*R*)-6-(4-chlorophenyl)-6-hydroxy-5-(methoxycarbonyl)-4-phenyl-3-p-tolylcyclohex-2-enyl benzoate (4p)**: Yellow oil, 61.8 mg, 56% yield.  $^1H$  NMR (400 MHz,  $CDCl_3$ )  $\delta$  7.92–7.90 (m, 2H), 7.58–7.54 (m, 3H), 7.48–7.41 (m, 2H), 7.20–7.09 (m, 9H), 6.92–6.90 (m, 2H), 6.38 (d,  $J$  = 5.8 Hz, 1H), 5.48 (d,  $J$  = 5.8 Hz, 1H), 4.53 (d,  $J$  = 10.2 Hz, 1H), 4.31 (s, 1H), 3.79 (d,  $J$  = 10.2 Hz, 1H), 3.32 (s, 3H);  $^{13}C$  NMR (100 MHz,  $CDCl_3$ )  $\delta$  175.9, 164.8, 144.6, 141.4, 141.3, 137.2, 136.8, 134.0, 133.3, 129.9, 129.6, 128.8, 128.6, 128.5, 128.2, 128.1, 127.0, 122.1, 74.4, 71.5, 53.5, 51.9, 46.8, 21.2; HRMS (ESI,  $m/z$ ): calcd. for  $C_{34}H_{29}ClO_5Na^+$  575.1596, found 575.1592; IR (KBr thin film,  $cm^{-1}$ ):  $\nu$  3498, 3028, 2923, 1720, 1491, 1262, 1095, 710;  $[\alpha]_D^{30}$ : 2.2 ( $c$  1.7,  $CHCl_3$ ); HPLC analysis: 80% ee (Chiralcel AD-H, 10:90  $i$ PrOH/hexane, 1 mL/min, 254 nm),  $R_t$  (major) = 5.7 min,  $R_t$  (minor) = 12.2 min.

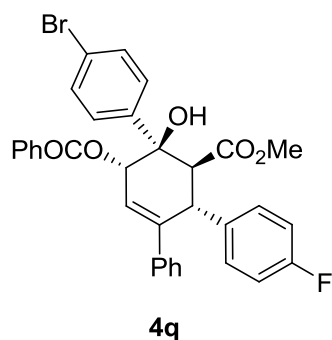

**(1S,4R,5S,6R)-6-(4-bromophenyl)-4-(4-fluorophenyl)-6-hydroxy-5-(methoxycarbonyl)-3-phenylcyclohex-2-enyl benzoate (4q):** Yellow oil, 78.0 mg, 65% yield.  $^1\text{H}$  NMR (400 MHz,  $\text{CDCl}_3$ )  $\delta$  7.91–7.89 (m, 2H), 7.59–7.55 (m, 1H), 7.51–7.42 (m, 4H), 7.35–7.33 (m, 2H), 7.19–7.04 (m, 7H), 6.89–6.84 (m, 2H), 6.39 (dd,  $J = 5.7$  and 2.2 Hz, 1H), 5.47 (d,  $J = 5.7$  Hz, 1H), 4.54 (d,  $J = 10.2$  Hz, 1H), 4.28 (s, 1H), 3.74 (d,  $J = 10.3$  Hz, 1H), 3.35 (s, 3H);  $^{13}\text{C}$  NMR (100 MHz,  $\text{CDCl}_3$ )  $\delta$  175.7, 164.8, 161.7 (d,  $J = 244.2$  Hz), 144.6, 140.7 (d,  $J = 211.3$  Hz), 136.8 (d,  $J = 3.3$  Hz), 134.0, 133.4, 131.2, 130.0 (d,  $J = 8.0$  Hz), 129.8, 129.6, 128.6, 128.4, 128.2, 127.6, 127.2, 123.0, 122.4, 115.8 (d,  $J = 21.3$  Hz), 74.5, 71.3, 53.4, 52.1, 46.1; HRMS (ESI,  $m/z$ ): calcd. for  $\text{C}_{33}\text{H}_{26}\text{BrFO}_5\text{Na}^+$  623.0840, found 623.0840; IR (KBr thin film,  $\text{cm}^{-1}$ ):  $\nu$  3500, 3062, 2953, 1720, 1509, 1262, 1095, 711;  $[\alpha]_D^{31}$ : 5.4 ( $c$  1.8,  $\text{CHCl}_3$ ); HPLC analysis: 82% ee (Chiralcel AD-H, 10:90  $i$ PrOH/hexane, 1 mL/min, 254 nm),  $R_t$  (major) = 7.5 min,  $R_t$  (minor) = 9.9 min.

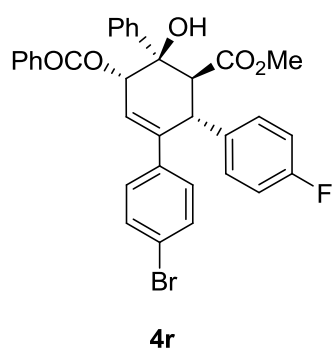

**(1S,4R,5S,6R)-3-(4-bromophenyl)-4-(4-fluorophenyl)-6-hydroxy-5-(methoxycarbonyl)-6-phenylcyclohex-2-enyl benzoate (4r):** Yellow oil, 66.0 g, 55% yield.  $^1\text{H}$  NMR (400 MHz,  $\text{CDCl}_3$ )  $\delta$  7.89–7.87 (m, 2H), 7.63–7.61 (m, 2H), 7.56–7.52 (m, 1H), 7.43–7.39 (m, 2H), 7.23–7.14 (m, 5H), 7.07–7.04 (m, 4H), 6.90–6.86 (m, 2H), 6.41 (dd,  $J = 5.7$  and 2.1 Hz, 1H), 5.48 (d,  $J = 5.7$  Hz, 1H), 4.53 (d,  $J = 9.3$  Hz, 1H), 4.25 (s,

1H), 3.79 (d,  $J = 10.3$  Hz, 1H), 3.32 (s, 3H);  $^{13}\text{C}$  NMR (100 MHz,  $\text{CDCl}_3$ )  $\delta$  175.7, 164.9, 163.0, 160.5, 143.6, 142.3, 138.7, 136.6 (d,  $J = 3.2$  Hz), 133.2, 131.3, 130.0 (d,  $J = 8.0$  Hz), 129.8, 129.6, 128.8, 128.5, 128.2, 128.1, 126.4, 123.8, 121.5, 115.9 (d,  $J = 21.4$  Hz), 74.6, 71.4, 53.4 51.9, 46.0; HRMS (ESI,  $m/z$ ): calcd. for  $\text{C}_{33}\text{H}_{26}\text{BrFO}_5\text{Na}^+$  623.0840, found 623.0836; IR (KBr thin film,  $\text{cm}^{-1}$ ):  $\nu$  3508, 3062, 2952, 1719, 1509, 1263, 1096, 710;  $[\alpha]_{\text{D}}^{31}$ : -18.9 ( $c$  1.6,  $\text{CHCl}_3$ ); HPLC analysis: 92% ee (Chiralcel AD-H, 10:90  $i$ PrOH/hexane, 1 mL/min, 254 nm),  $R_t$  (major) = 8.1 min,  $R_t$  (minor) = 10.8 min.

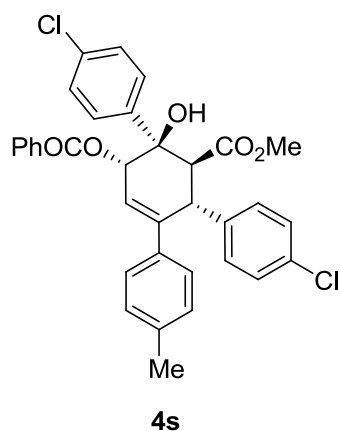

**(1S,4R,5S,6R)-4,6-bis(4-chlorophenyl)-6-hydroxy-5-(methoxycarbonyl)-3-p-tolylecyclohex-2-enyl benzoate (4s):** Yellow oil, 82.0 mg, 70% yield.  $^1\text{H}$  NMR (400 MHz,  $\text{CDCl}_3$ )  $\delta$  7.91–7.89 (m, 2H), 7.58–7.54 (m, 3H), 7.45–7.41 (m, 2H), 7.24–7.14 (m, 4H), 7.08–7.02 (m, 4H), 6.94–6.92 (m, 2H), 6.37 (dd,  $J = 5.8$  and 2.0 Hz, 1H), 5.47 (d,  $J = 5.8$  Hz, 1H), 4.53 (d,  $J = 10.2$  Hz, 1H), 4.26 (s, 1H), 3.73 (d,  $J = 10.3$  Hz, 1H), 3.35 (s, 3H), 2.20 (s, 3H);  $^{13}\text{C}$  NMR (100 MHz,  $\text{CDCl}_3$ )  $\delta$  175.6, 164.8, 141.1, 139.9, 137.4, 136.5, 134.1, 133.3, 132.7, 129.83, 129.81, 129.6, 129.0, 128.9, 128.6, 128.2, 128.0, 126.9, 122.4, 74.4, 71.4, 53.4, 52.0, 46.2, 21.2; HRMS (ESI,  $m/z$ ): calcd. for  $\text{C}_{34}\text{H}_{28}\text{Cl}_2\text{O}_5\text{Na}^+$  609.1206, found 609.1206; IR (KBr thin film,  $\text{cm}^{-1}$ ):  $\nu$  3456, 2960, 2927, 1729, 1489, 1250, 1093, 711;  $[\alpha]_{\text{D}}^{27}$ : -6.7 ( $c$  1.8,  $\text{CHCl}_3$ ); HPLC analysis: 85% ee (Chiralcel AD-H, 10:90  $i$ PrOH/hexane, 1 mL/min, 254 nm),  $R_t$  (major) = 7.9 min,  $R_t$  (minor) = 9.9 min.

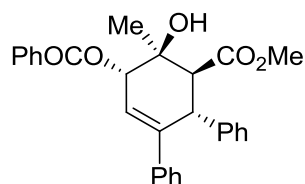

**4t**

**(1S,4R,5S,6S)-6-hydroxy-5-(methoxycarbonyl)-6-methyl-3,4-diphenylcyclohex-2-enyl benzoate (4t):** Yellow oil, 35.4 mg, 40% yield.  $^1\text{H}$  NMR (400 MHz,  $\text{CDCl}_3$ )  $\delta$  8.11–8.09 (m, 2H), 7.63–7.60 (m, 1H), 7.52–7.48 (m, 2H), 7.20–7.04 (m, 10H), 6.37 (d,  $J = 4.7$  Hz, 1H), 5.45 (d,  $J = 5.7$  Hz, 1H), 4.48 (d,  $J = 10.3$  Hz, 1H), 3.58 (s, 3H), 3.32 (s, 1H), 3.13 (d,  $J = 10.4$  Hz, 1H), 1.37 (s, 3H);  $^{13}\text{C}$  NMR (100 MHz,  $\text{CDCl}_3$ )  $\delta$  175.3, 165.6, 145.1, 141.4, 139.8, 133.5, 130.1, 129.9, 128.75, 128.68, 128.5, 128.0, 127.4, 127.1, 126.8, 122.4, 71.8, 70.9, 55.9, 52.0, 46.2, 25.1; HRMS (ESI,  $m/z$ ): calcd. for  $\text{C}_{28}\text{H}_{27}\text{O}_5^+$  443.1853, found 443.1852; IR (KBr thin film,  $\text{cm}^{-1}$ ):  $\nu$  3514, 2953, 1720, 1452, 1263, 1107, 700;  $[\alpha]_D^{31}$ : -7.6 ( $c$  1.5,  $\text{CHCl}_3$ ); HPLC analysis: 61% ee (Chiralcel AD-H, 10:90  $i$ PrOH/hexane, 1 mL/min, 254 nm),  $R_t$  (minor) = 12.3 min,  $R_t$  (major) = 24.1 min.

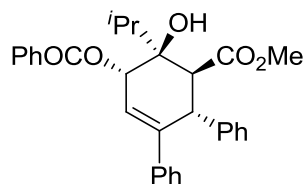

**4u**

**(1S,4R,5S,6S)-6-hydroxy-6-isopropyl-5-(methoxycarbonyl)-3,4-diphenylcyclohex-2-enyl benzoate (4u):** Yellow oil, 14.1 mg, 15% yield.  $^1\text{H}$  NMR (400 MHz,  $\text{CDCl}_3$ )  $\delta$  8.12–8.10 (m, 2H), 7.64–7.60 (m, 1H), 7.52–7.48 (m, 2H), 7.17–7.03 (m, 10H), 6.41 (dd,  $J = 6.0$  and 1.9 Hz, 1H), 5.62 (d,  $J = 6.0$  Hz, 1H), 4.44 (d,  $J = 10.1$  Hz, 1H), 3.57 (s, 3H), 3.41 (d,  $J = 10.1$  Hz, 1H), 3.29 (s, 1H), 1.94–1.87 (m, 1H), 1.09–1.06 (m, 6H);  $^{13}\text{C}$  NMR (100 MHz,  $\text{CDCl}_3$ )  $\delta$  176.1, 165.2, 144.5, 141.5, 133.4, 130.1, 130.0, 128.8, 128.7, 128.5, 128.0, 127.4, 127.1, 126.8, 122.7, 69.2, 54.0, 51.9, 47.2, 37.4, 18.6, 16.7; HRMS (ESI,  $m/z$ ): calcd. for  $\text{C}_{30}\text{H}_{30}\text{O}_5\text{Na}^+$  493.1986, found 493.1987; IR (KBr thin film,  $\text{cm}^{-1}$ ):  $\nu$  2925, 2853, 1719, 1263, 1095, 711;  $[\alpha]_D^{32}$ : -16.9 ( $c$  1.9,  $\text{CHCl}_3$ ); HPLC analysis: 99% ee (Chiralcel AD-H, 10:90  $i$ PrOH/hexane, 1 mL/min, 254 nm),  $R_t$

(minor) = 6.8 min,  $R_t$  (major) = 12.9 min.

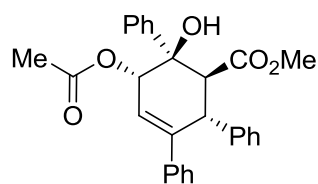

**4v**

**(1*S*,2*R*,5*S*,6*R*)-methyl**

**5-acetoxy-6-hydroxy-2,3,6-triphenylcyclohex-3-enecarboxylate (4v):** Yellow oil, 36.2 mg, 41% yield.  $^1\text{H}$  NMR (400 MHz,  $\text{CDCl}_3$ )  $\delta$  7.58–7.56 (m, 2H), 7.31–7.03 (m, 13H), 6.22 (dd,  $J$  = 5.6 and 1.6 Hz, 1H), 5.30 (d,  $J$  = 5.1 Hz, 1H), 4.51 (d,  $J$  = 10.4 Hz, 1H), 4.21 (s, 1H), 3.69 (d,  $J$  = 10.4 Hz, 1H), 3.25 (s, 3H), 1.82 (s, 3H);  $^{13}\text{C}$  NMR (100 MHz,  $\text{CDCl}_3$ )  $\delta$  176.0, 169.2, 144.5, 142.6, 141.1, 140.0, 128.62, 128.59, 128.0, 127.9, 127.3, 127.1, 126.9, 126.6, 123.0, 74.5, 70.7, 53.3, 51.7, 46.7, 20.9; HRMS (ESI,  $m/z$ ): calcd. for  $\text{C}_{28}\text{H}_{27}\text{O}_5^+$  443.1853, found 443.1862; IR (KBr thin film,  $\text{cm}^{-1}$ ):  $\nu$  3502, 3027, 2926, 1741, 1369, 1229, 700;  $[\alpha]_{\text{D}}^{29}$ : -14.5 ( $c$  2.7,  $\text{CHCl}_3$ ); HPLC analysis: 83% ee (Chiralcel AD-H, 10:90  $i$ PrOH/hexane, 1 mL/min, 254 nm),  $R_t$  (major) = 7.5 min,  $R_t$  (minor) = 12.1 min.

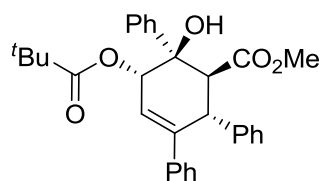

**4w**

**(1*S*,2*R*,5*S*,6*R*)-methyl**

**6-hydroxy-2,3,6-triphenyl-5-(pivaloyloxy)cyclohex-3-enecarboxylate (4w):** Yellow oil, 54.2 mg, 56% yield.  $^1\text{H}$  NMR (400 MHz,  $\text{CDCl}_3$ )  $\delta$  7.59–7.57 (m, 2H), 7.30–7.02 (m, 13H), 6.31 (d,  $J$  = 4.4 Hz, 1H), 5.21 (d,  $J$  = 5.6 Hz, 1H), 4.50 (d,  $J$  = 10.1 Hz, 1H), 4.28 (s, 1H), 3.72 (d,  $J$  = 10.3 Hz, 1H), 3.30 (s, 3H), 1.03 (s, 9H);  $^{13}\text{C}$  NMR (100 MHz,  $\text{CDCl}_3$ )  $\delta$  176.7, 176.1, 144.4, 143.0, 141.2, 140.0, 128.6, 128.5, 128.0, 127.94, 127.91, 127.3, 127.1, 126.9, 126.6, 123.0, 74.4, 71.3, 53.1, 51.7, 46.9, 38.7, 27.1; HRMS (ESI,  $m/z$ ): calcd. for  $\text{C}_{31}\text{H}_{32}\text{O}_5\text{Na}^+$  507.2142, found 507.2140; IR (KBr thin film,  $\text{cm}^{-1}$ ):  $\nu$  3504, 2972, 1731, 1145, 759, 700;  $[\alpha]_{\text{D}}^{32}$ : -30.1 ( $c$  3.3,  $\text{CHCl}_3$ ); HPLC analysis: 91% ee (Chiralcel AD-H, 10:90  $i$ PrOH/hexane, 1 mL/min, 254 nm),  $R_t$

(major) = 5.0 min,  $R_t$  (minor) = 6.5 min.

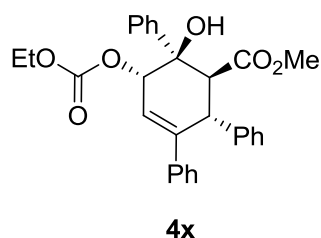

**(1*S*,2*R*,5*S*,6*R*)-methyl**

**5-(ethoxycarbonyloxy)-6-hydroxy-2,3,6-triphenylcyclohex-3-enecarboxylate (**4x**):**

Yellow oil, 33.0 mg, 35% yield.  $^1\text{H}$  NMR (400 MHz,  $\text{CDCl}_3$ )  $\delta$  7.62–7.60 (m, 2H), 7.32–7.05 (m, 13H), 6.24 (dd,  $J = 5.8$  and 2.2 Hz, 1H), 5.16 (dd,  $J = 5.8$  and 0.8 Hz, 1H), 4.49 (dd,  $J = 10.4$  and 1.0 Hz, 1H), 4.24 (s, 1H), 3.97–3.89 (m, 2H), 3.71 (d,  $J = 10.4$  Hz, 1H), 3.23 (s, 3H), 1.13 (t,  $J = 7.1$  Hz, 3H);  $^{13}\text{C}$  NMR (100 MHz,  $\text{CDCl}_3$ )  $\delta$  176.1, 154.0, 145.3, 142.1, 140.8, 140.0, 128.8, 128.6, 128.03, 128.02, 128.00, 127.4, 127.2, 126.9, 126.8, 122.3, 74.5, 73.7, 64.2, 53.1, 51.7, 46.8, 14.3; HRMS (ESI,  $m/z$ ): calcd. for  $\text{C}_{29}\text{H}_{28}\text{O}_6\text{Na}^+$  495.1778, found 495.1776; IR (KBr thin film,  $\text{cm}^{-1}$ ):  $\nu$  3503, 2926, 1748, 1716, 1248, 699;  $[\alpha]_D^{31}$ : -25.2 ( $c$  1.5,  $\text{CHCl}_3$ ); HPLC analysis: 86% ee (Chiralcel AD-H, 10:90  $i$ PrOH/hexane, 1 mL/min, 254 nm),  $R_t$  (major) = 6.5 min,  $R_t$  (minor) = 13.3 min.

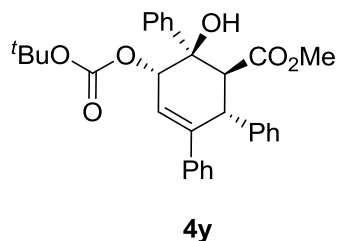

**(1*S*,2*R*,5*S*,6*R*)-methyl**

**5-(tert-butoxycarbonyloxy)-6-hydroxy-2,3,6-triphenylcyclohex-3-enecarboxylate (**4y**):**

Yellow oil, 33.0 mg, 33% yield.  $^1\text{H}$  NMR (400 MHz,  $\text{CDCl}_3$ )  $\delta$  7.62–7.60 (m, 2H), 7.31–7.27 (m, 2H), 7.24–7.20 (m, 3H), 7.15–7.03 (m, 8H), 6.20 (dd,  $J = 5.7$  and 2.1 Hz, 1H), 5.19 (d,  $J = 5.2$  Hz, 1H), 4.49 (d,  $J = 10.2$  Hz, 1H), 4.23 (s, 1H), 3.71 (d,  $J = 10.5$  Hz, 1H), 3.20 (s, 3H), 1.23 (s, 9H);  $^{13}\text{C}$  NMR (100 MHz,  $\text{CDCl}_3$ )  $\delta$  176.1, 152.2, 144.7, 142.2, 140.9, 140.1, 128.8, 128.5, 127.98, 127.95, 127.8, 127.23, 127.16, 126.8, 122.7, 82.2, 74.7, 72.6, 53.2, 51.6, 46.7, 27.6; HRMS (ESI,  $m/z$ ): calcd. for  $\text{C}_{31}\text{H}_{33}\text{O}_6^+$  501.2272, found 501.2279; IR (KBr thin film,  $\text{cm}^{-1}$ ):  $\nu$  3503, 2980, 1745,

1271, 1168, 700;  $[\alpha]_{\text{D}}^{28}$ : -15.4 (*c* 2.2,  $\text{CHCl}_3$ ); HPLC analysis: 81% ee (Chiralcel AD-H, 10:90 *i*PrOH/hexane, 1 mL/min, 254 nm),  $R_t$  (major) = 4.7 min,  $R_t$  (minor) = 9.5 min.

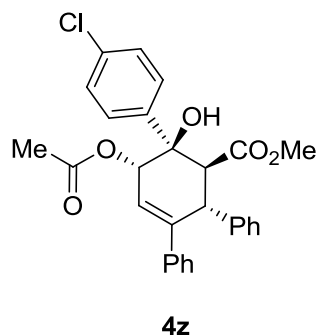

**(1*S*,2*R*,5*S*,6*R*)-methyl**

**5-acetoxy-6-(4-chlorophenyl)-6-hydroxy-2,3-diphenylcyclohex-3-enecarboxylate**

**(4z)**: Yellow oil, 39.0 mg, 41% yield.  $^1\text{H}$  NMR (400 MHz,  $\text{CDCl}_3$ )  $\delta$  7.53–7.51 (m, 2H), 7.28–7.25 (m, 2H), 7.21–7.06 (m, 10H), 6.22 (dd,  $J$  = 5.7 and 1.9 Hz, 1H), 5.26 (d,  $J$  = 5.7 Hz, 1H), 4.48 (d,  $J$  = 10.3 Hz, 1H), 4.24 (s, 1H), 3.64 (d,  $J$  = 10.4 Hz, 1H), 3.27 (s, 3H);  $^{13}\text{C}$  NMR (100 MHz,  $\text{CDCl}_3$ )  $\delta$  175.8, 169.1, 144.5, 141.3, 140.8, 139.8, 134.0, 128.7, 128.6, 128.2, 128.1, 128.0, 127.4, 127.1, 127.0, 122.8, 74.3, 70.5, 53.2, 51.9, 46.7, 20.9; HRMS (ESI,  $m/z$ ): calcd. for  $\text{C}_{28}\text{H}_{26}\text{ClO}_5^+$  477.1463, found 477.1455; IR (KBr thin film,  $\text{cm}^{-1}$ ):  $\nu$  3502, 2925, 2853, 1744, 1370, 1226, 1017, 699;  $[\alpha]_{\text{D}}^{31}$ : 4.3 (*c* 2.0,  $\text{CHCl}_3$ ); HPLC analysis: 84% ee (Chiralcel AD-H, 10:90 *i*PrOH/hexane, 1 mL/min, 254 nm),  $R_t$  (major) = 7.4 min,  $R_t$  (minor) = 11.3 min.

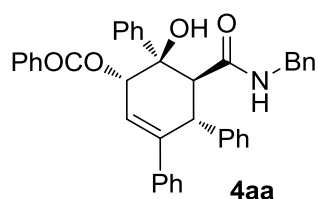

**(1*S*,4*R*,5*S*,6*R*)-5-(benzylcarbamoyl)-6-hydroxy-3,4,6-triphenylcyclohex-2-enyl**

**benzoate (4aa)**: Yellow oil, 30.1 mg, 52% yield.  $^1\text{H}$  NMR (400 MHz,  $\text{CDCl}_3$ )  $\delta$  7.94–7.92 (m, 2H), 7.66–7.64 (m, 2H), 7.55–7.51 (m, 1H), 7.42–7.39 (m, 2H), 7.23–7.05 (m, 16H), 6.68–6.66 (m, 2H), 6.42 (dd,  $J$  = 5.8 and 1.8 Hz, 1H), 5.70 (s, 1H), 5.49 (d,  $J$  = 5.8 Hz, 1H), 5.28 (d,  $J$  = 5.3 Hz, 1H), 4.64 (d,  $J$  = 9.4 Hz, 1H), 4.24 (dd,  $J$  = 14.7 and 6.4 Hz, 1H), 3.83 (dd,  $J$  = 14.7 and 4.7 Hz, 1H), 3.44 (d,  $J$  = 9.9 Hz,

<sup>1</sup>H); <sup>13</sup>C NMR (100 MHz, CDCl<sub>3</sub>) δ 174.1, 164.9, 144.9, 143.0, 142.1, 140.1, 137.0, 133.1, 130.2, 129.6, 128.8, 128.6, 128.5, 128.0, 127.8, 127.7, 127.5, 127.3, 127.2, 126.9, 126.7, 123.0, 74.5, 71.6, 54.2, 46.6, 43.3; HRMS (ESI, m/z): calcd. for C<sub>39</sub>H<sub>34</sub>NO<sub>4</sub><sup>+</sup> 580.2482, found 580.2488; IR (KBr thin film, cm<sup>-1</sup>) ν 3356, 2921, 2852, 1718, 1641, 1262, 1094, 969, 702; [α]<sub>D</sub><sup>27.7</sup> -4.073 (c 1.85, CHCl<sub>3</sub>); HPLC analysis: 90% ee (Chiralcel AD-H, 30:70 <sup>i</sup>PrOH/hexane, 1 mL/min, 254 nm), R<sub>t</sub> (major) = 3.7 min, R<sub>t</sub> (minor) = 6.0 min.

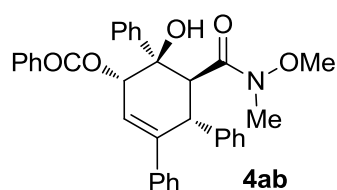

**(1'R,4'S,5'R,6'S)-5'-hydroxy-6'-(methoxy(methyl)carbamoyl)-5'-phenyl-1',4',5',6'-tetrahydro-[1,1':2',1''-terphenyl]-4'-yl benzoate (4ab):** Yellow oil, 68.2 mg, 64% yield. <sup>1</sup>H NMR (400 MHz, CDCl<sub>3</sub>) δ 7.95–7.93 (m, 2H), 7.69–7.67 (m, 2H), 7.55–7.53 (m, 1H), 7.45–7.41 (m, 2H), 7.25–7.03 (m, 13H), 6.46 (dd, *J* = 5.8 and 2.0 Hz, 1H), 5.43–5.42 (m, 2H), 4.69 (d, *J* = 10.0 Hz, 1H), 4.46 (d, *J* = 10.1 Hz, 1H), 2.78 (s, 3H), 2.54 (s, 3H); <sup>13</sup>C NMR (100 MHz, CDCl<sub>3</sub>) δ 176.0, 165.1, 145.6, 143.1, 142.2, 140.4, 133.0, 130.4, 129.6, 129.5, 128.8, 128.4, 127.9, 127.8, 127.74, 127.67, 127.1, 126.8, 123.1, 75.9, 72.1, 60.3, 47.1, 46.6, 31.8; HRMS (ESI, m/z): calcd. for C<sub>34</sub>H<sub>32</sub>NO<sub>5</sub><sup>+</sup> 534.2275, found 534.2277; IR (KBr thin film, cm<sup>-1</sup>): ν 3421, 2919, 2850, 1718, 1624, 1261, 1096, 701; [α]<sub>D</sub><sup>28</sup>: -9.1 (c 2.0, CHCl<sub>3</sub>); HPLC analysis: 88% ee (Chiralcel AD-H, 30:70 <sup>i</sup>PrOH/hexane, 1 mL/min, 254 nm), R<sub>t</sub> (major) = 3.8 min, R<sub>t</sub> (minor) = 5.3 min.

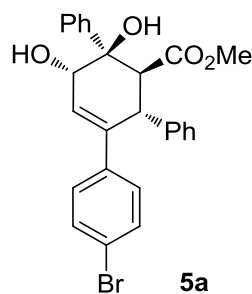

**(2'R,3'S,4'R,5'S)-methyl 4-bromo-4',5'-dihydroxy-4'-phenyl-2',3',4',5'-tetrahydro-[1,1':2',1''-terphenyl]-3'**

**-carboxylate (5a):** White solid, 340.3 mg, 89% yield . Mp 227–230 °C. <sup>1</sup>H NMR (400 MHz, CDCl<sub>3</sub>) δ 7.61–7.59 (m, 2H), 7.39–7.29 (m, 3H), 7.26–7.24 (m, 2H), 7.18–7.06 (m, 7H), 6.27 (dd, *J* = 5.5 and 2.0 Hz, 1H), 4.41 (d, *J* = 10.1 Hz, 1H), 4.14 (s, 1H), 4.03 (s, 1H), 3.68 (d, *J* = 10.4 Hz, 1H), 3.25 (s, 3H), 1.63 (d, *J* = 3.1 Hz, 1H); <sup>13</sup>C NMR (100 MHz, CDCl<sub>3</sub>) δ 176.3, 143.0, 142.1, 140.8, 139.4, 131.1, 128.8, 128.7, 128.64, 128.58, 128.3, 127.0, 126.6, 126.1, 121.1, 75.8, 70.2, 52.1, 51.7, 46.8; HRMS (ESI, *m/z*): calcd. for C<sub>26</sub>H<sub>23</sub>BrO<sub>4</sub>Na<sup>+</sup> 501.0672, found 501.0664; IR (KBr thin film, cm<sup>-1</sup>): ν 3450, 1701, 1045, 980, 806, 699; [ $\alpha$ ]<sub>D</sub><sup>27</sup>: -11.1 (*c* 0.3, CHCl<sub>3</sub>); HPLC analysis: 93% ee (Chiralcel AD-H, 20:80 iPrOH/hexane, 1 mL/min, 254 nm), *R*<sub>t</sub> (minor) = 6.1 min, *R*<sub>t</sub> (major) = 7.2 min.

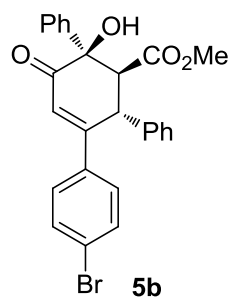

**(2'R,3'S,4'R)-methyl**

**4-bromo-4'-hydroxy-5'-oxo-4'-phenyl-2',3',4',5'-tetrahydro-[1,1':2',1''-terphenyl]**

**-3'-carboxylate (5b):** White solid, 127.1 mg, 89% yield. Mp 70–71 °C. <sup>1</sup>H NMR (400 MHz, CDCl<sub>3</sub>) δ 7.37–7.35 (m, 2H), 7.26–7.23 (m, 2H), 7.16 (s, 4H), 7.00–6.98 (m, 3H), 6.83–6.80 (m, 3H), 4.75 (dd, *J* = 5.7 and 1.3 Hz, 1H), 4.36 (s, 1H), 3.90 (d, *J* = 5.8 Hz, 1H), 3.44 (s, 3H); <sup>13</sup>C NMR (100 MHz, CDCl<sub>3</sub>) δ 196.3, 173.0, 157.4, 139.5, 138.7, 136.4, 131.9, 128.7, 128.6, 128.5, 128.2, 127.0, 126.54, 126.50, 124.3, 76.5, 59.7, 52.3, 45.8; HRMS (ESI, *m/z*): calcd. for C<sub>26</sub>H<sub>22</sub>BrO<sub>4</sub><sup>+</sup> 477.0696, found 477.0698; IR (KBr thin film, cm<sup>-1</sup>): ν 3461, 2925, 1737, 1679, 1167, 698; [ $\alpha$ ]<sub>D</sub><sup>27</sup>: -23.3 (*c* 0.1, CHCl<sub>3</sub>); HPLC analysis: 94% ee (Chiralcel AD-H, 20:80 iPrOH/hexane, 1 mL/min, 254 nm), *R*<sub>t</sub> (minor) = 15.5 min, *R*<sub>t</sub> (major) = 20.9 min.

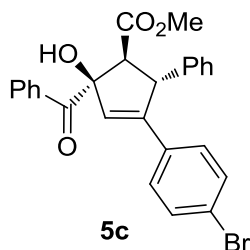

**(1S,2R,5R)-methyl**

**2-benzoyl-4-(4-bromophenyl)-2-hydroxy-5-phenylcyclopent-3-enecarboxylate**

**(5c):** White solid, 39.0 mg, 82% yield. Mp 45–46 °C.  $^1\text{H}$  NMR (400 MHz,  $\text{CDCl}_3$ )  $\delta$  8.21–8.19 (m, 2H), 7.62–7.58 (m, 1H), 7.51–7.48 (m, 2H), 7.37–7.34 (m, 2H), 7.23–7.12 (m, 7H), 6.36 (d,  $J = 1.9$  Hz, 1H), 5.22 (dd,  $J = 5.7$  and 1.9 Hz, 1H), 4.90 (s, 1H), 3.78 (d,  $J = 7.7$  Hz, 1H), 3.64 (s, 3H);  $^{13}\text{C}$  NMR (100 MHz,  $\text{CDCl}_3$ )  $\delta$  199.9, 169.9, 149.9, 141.5, 133.9, 133.8, 133.1, 131.7, 129.9, 129.0, 128.84, 128.81, 128.4, 128.3, 127.1, 122.8, 87.8, 63.1, 52.2, 51.7; HRMS (ESI,  $m/z$ ): calcd. for  $\text{C}_{26}\text{H}_{22}\text{BrO}_4^+$  477.0696, found 477.0693; IR (KBr thin film,  $\text{cm}^{-1}$ ):  $\nu$  3433, 2951, 1745, 1677, 1488, 1232, 699;  $[\alpha]_D^{27}$ : -12.7 ( $c$  0.3,  $\text{CHCl}_3$ ); HPLC analysis: 94% ee (Chiralcel AS-H, 20:80 iPrOH/hexane, 1 mL/min, 254 nm),  $R_t$  (major) = 7.1 min,  $R_t$  (minor) = 8.8 min.

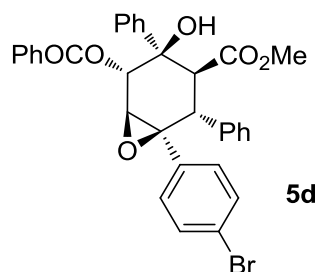

**(1S,2R,3S,4R,5S,6S)-methyl**

**5-(benzoyloxy)-1-(4-bromophenyl)-4-hydroxy-2,4-diphenyl-7-oxabicyclo[4.1.0]heptane-3-carboxylate (5d):**

White solid, 334.9 mg, 70% yield. Mp 202–205 °C.  $^1\text{H}$  NMR (400 MHz,  $\text{CDCl}_3$ )  $\delta$  8.06–8.04 (m, 2H), 7.68–7.64 (m, 3H), 7.56–7.52 (m, 2H), 7.21–7.01 (m, 12H), 5.63 (d,  $J = 2.7$  Hz, 1H), 4.79 (s, 1H), 4.45 (d,  $J = 11.1$  Hz, 1H), 3.99 (d,  $J = 11.1$  Hz, 1H), 3.95 (dd,  $J = 2.6$  and 0.8 Hz, 1H), 3.16 (s, 3H);  $^{13}\text{C}$  NMR (100 MHz,  $\text{CDCl}_3$ )  $\delta$  172.2, 164.5, 140.3, 139.2, 136.9, 133.8, 131.1, 130.1, 129.8, 129.7, 129.2, 128.9, 128.7, 128.0, 127.7, 127.5, 126.9, 122.2, 74.9, 70.9, 64.7, 60.3, 52.2, 51.8, 46.6; HRMS (ESI,  $m/z$ ): calcd. for  $\text{C}_{33}\text{H}_{28}\text{BrO}_6^+$  599.1064, found 599.1064;

IR (KBr thin film,  $\text{cm}^{-1}$ ):  $\nu$  3458, 3062, 1734, 1255, 1093, 1070, 703;  $[\alpha]_{\text{D}}^{27}$ : 9.6 ( $c$  0.1,  $\text{CHCl}_3$ ); HPLC analysis: 93% ee (Chiralcel AD-H, 30:70 iPrOH/hexane, 1 mL/min, 220 nm),  $R_t$  (minor) = 15.8 min,  $R_t$  (major) = 27.3 min.

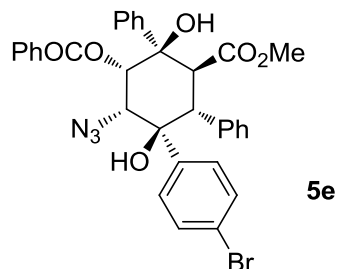

**(1S,2R,3S,4R,5S,6R)-6-azido-5-(4-bromophenyl)-2,5-dihydroxy-3-(methoxycarbonyl)-2,4-diphenylcyclohexyl benzoate (5e)**: White solid, 59.9 mg, 56% yield. Mp 223–225 °C.  $^1\text{H}$  NMR (400 MHz,  $\text{CDCl}_3$ )  $\delta$  7.98–7.96 (m, 2H), 7.67–7.65 (m, 2H), 7.59–7.55 (m, 1H), 7.48–7.38 (m, 4H), 7.33–7.30 (m, 2H), 7.24–7.15 (m, 6H), 5.59 (s, 1H), 5.55 (d,  $J$  = 2.4 Hz, 1H), 5.32 (d,  $J$  = 10.0 Hz, 1H), 4.62 (d,  $J$  = 11.6 Hz, 1H), 4.33 (dd,  $J$  = 10.0 and 2.4 Hz, 1H), 4.12 (d,  $J$  = 11.6 Hz, 1H), 3.02 (s, 3H);  $^{13}\text{C}$  NMR (100 MHz,  $\text{CDCl}_3$ )  $\delta$  175.4, 164.4, 140.8, 138.2, 135.4, 133.5, 131.1, 129.9, 129.7, 129.2, 128.63, 128.58, 128.3, 127.9, 126.4, 122.2, 74.2, 72.9, 69.8, 52.0, 48.9, 45.9; HRMS (ESI,  $m/z$ ): calcd. for  $\text{C}_{33}\text{H}_{28}\text{BrN}_3\text{O}_6\text{Na}^+$  664.1054, found 664.1054; IR (KBr thin film,  $\text{cm}^{-1}$ ):  $\nu$  3433, 2106, 1729, 1265, 1094, 700;  $[\alpha]_{\text{D}}^{27}$ : 13.7 ( $c$  0.1,  $\text{CHCl}_3$ ); HPLC analysis: 93% ee (Chiralcel AD-H, 50:50 iPrOH/hexane, 1 mL/min, 220 nm),  $R_t$  (minor) = 6.5 min,  $R_t$  (major) = 10.5 min.

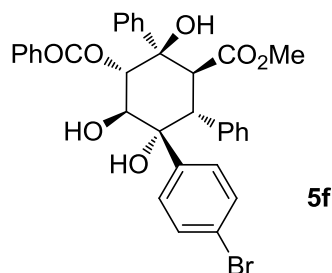

**(1S,2R,3S,4R,5S,6R)-5-(4-bromophenyl)-2,5,6-trihydroxy-3-(methoxycarbonyl)-2,4-diphenylcyclohexyl benzoate (5f)**: White solid, 76.5 mg, 71% yield. Mp 234–236 °C.  $^1\text{H}$  NMR (400 MHz,  $\text{CDCl}_3$ )  $\delta$  8.19–8.17 (m, 2H), 7.96 (brs, 1H), 7.68–7.55 (m, 5H), 7.41–7.30 (m, 6H), 7.14–7.10 (m, 3H), 6.98–6.95 (m, 1H), 6.45 (brs, 1H), 5.76 (d,  $J$  = 9.7 Hz, 1H), 5.65 (dd,  $J$  = 9.7 and 2.7 Hz, 1H), 5.56 (s, 1H),

4.82 (d,  $J = 11.9$  Hz, 1H), 4.12 (d,  $J = 11.9$  Hz, 1H), 4.02 (dd,  $J = 4.8$  and 2.8 Hz, 1H), 3.09 (s, 3H), 1.54 (d,  $J = 4.8$  Hz, 1H);  $^{13}\text{C}$  NMR (100 MHz,  $\text{CDCl}_3$ )  $\delta$  175.6, 165.7, 141.6, 139.2, 135.6, 133.0, 131.8, 130.3, 129.7, 129.0, 128.74, 128.67, 128.6, 127.7, 127.4, 126.5, 121.3, 85.2, 78.5, 75.7, 70.6, 52.0, 48.4, 47.8; HRMS (ESI,  $m/z$ ): calcd. for  $\text{C}_{33}\text{H}_{29}\text{BrO}_7\text{Na}^+$  639.0989, found 639.0995; IR (KBr thin film,  $\text{cm}^{-1}$ ):  $\nu$  3431, 1722, 1271, 1246, 1108, 1067, 700;  $[\alpha]_{\text{D}}^{27}$ : -4.0 ( $c$  0.2,  $\text{CHCl}_3$ ); HPLC analysis: 94% ee (Chiralcel IC, 10:90 iPrOH/hexane, 1 mL/min, 220 nm),  $R_t$  (major) = 9.9 min,  $R_t$  (minor) = 12.7 min.

## VI. $^1\text{H}$ NMR and $^{13}\text{C}$ NMR Spectra of Substrates and Products

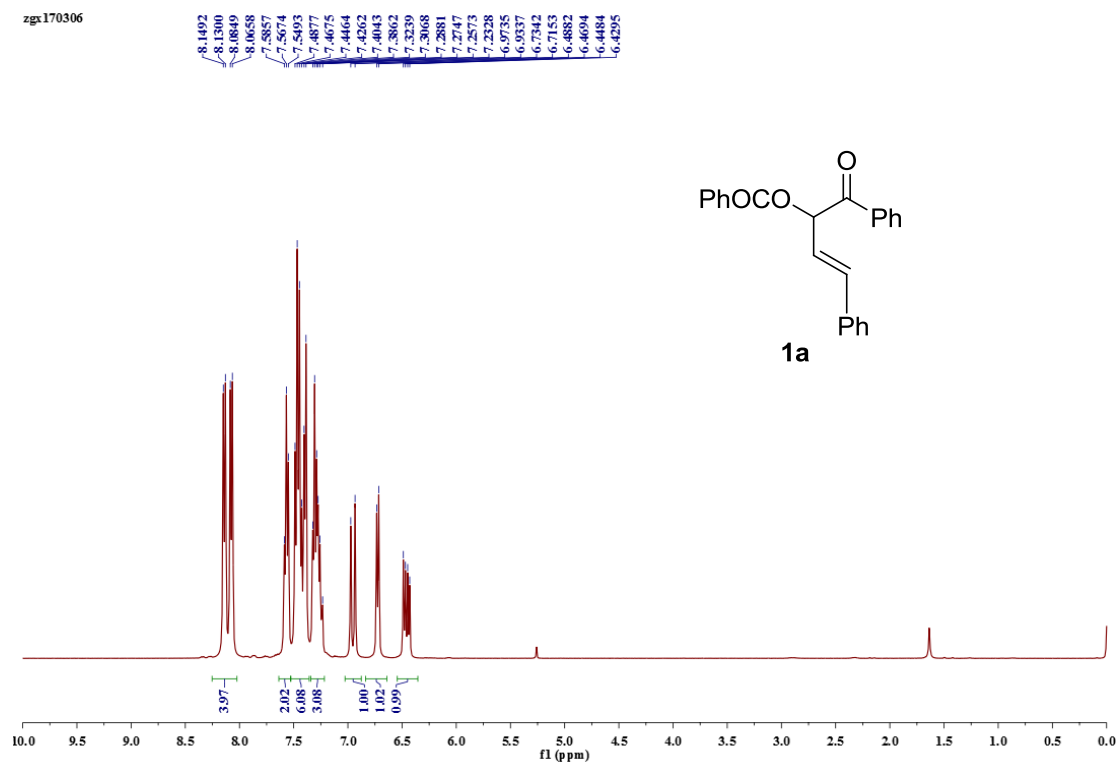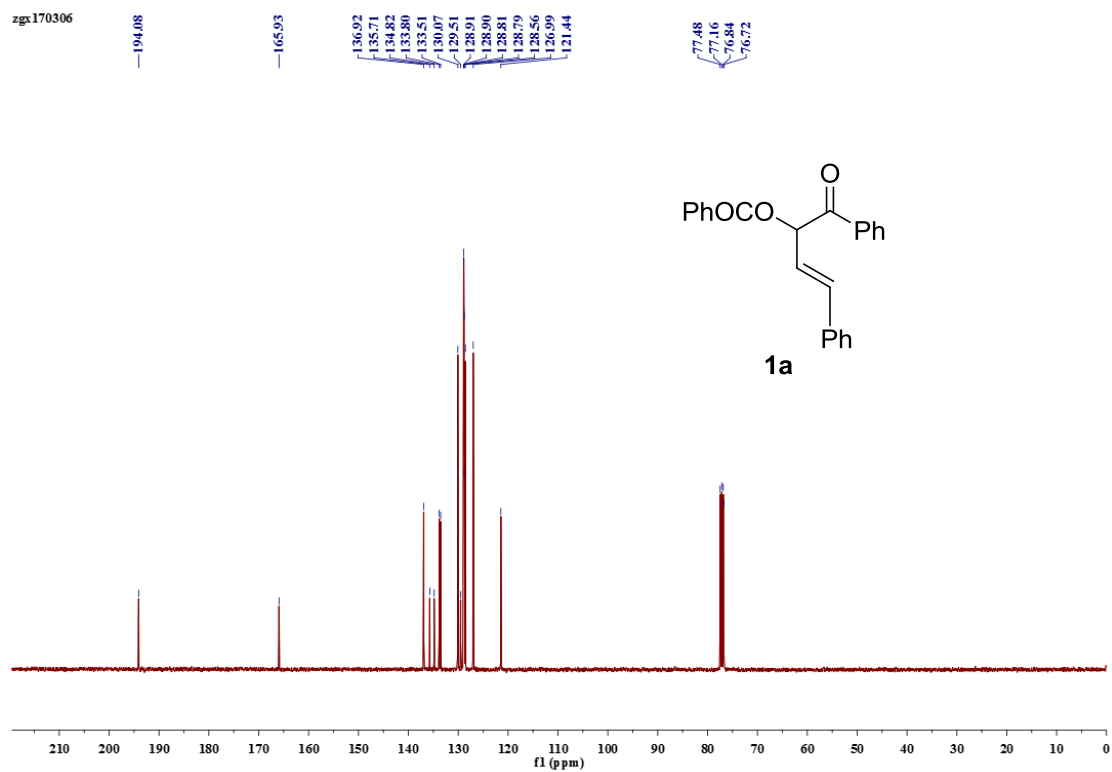

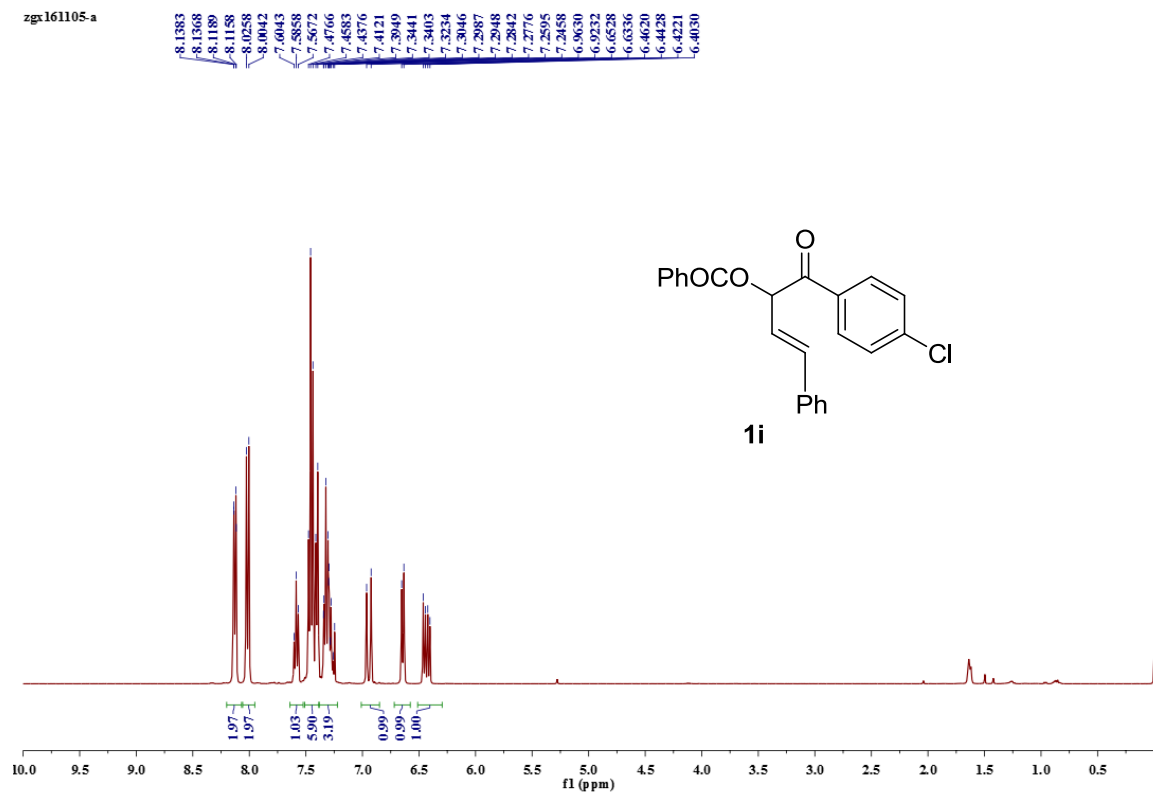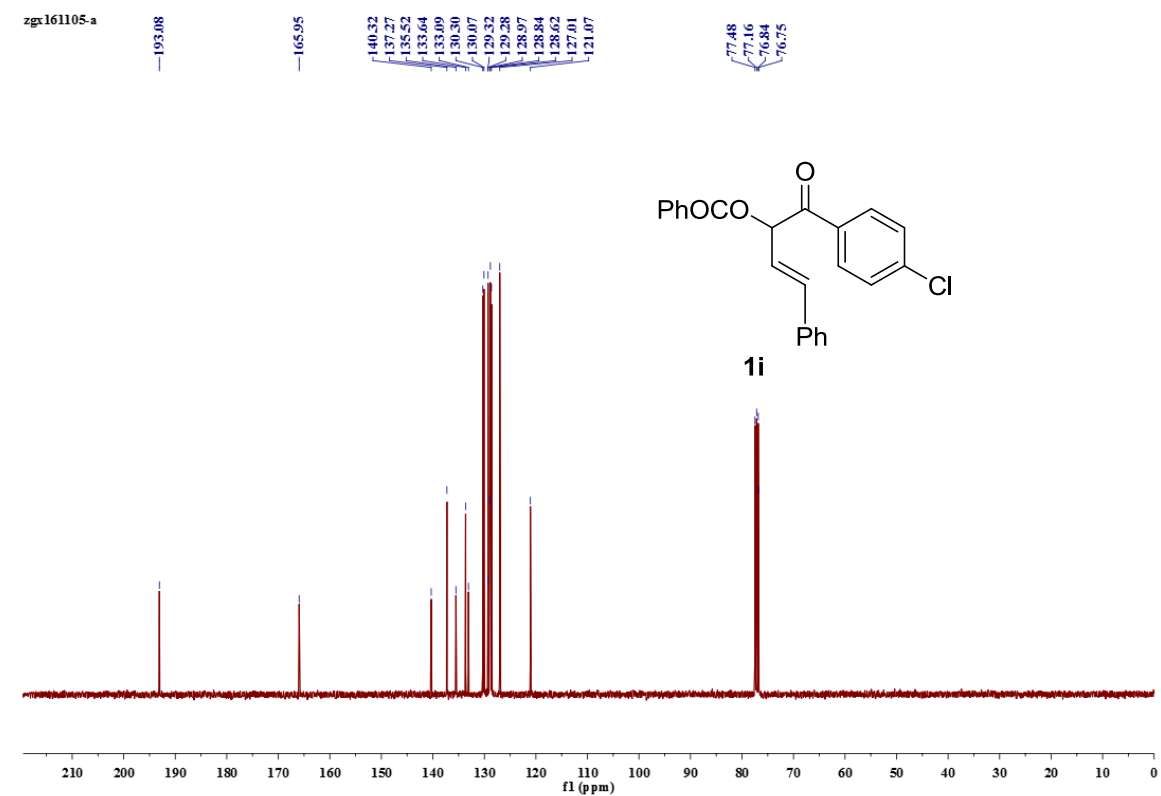

h170217-3

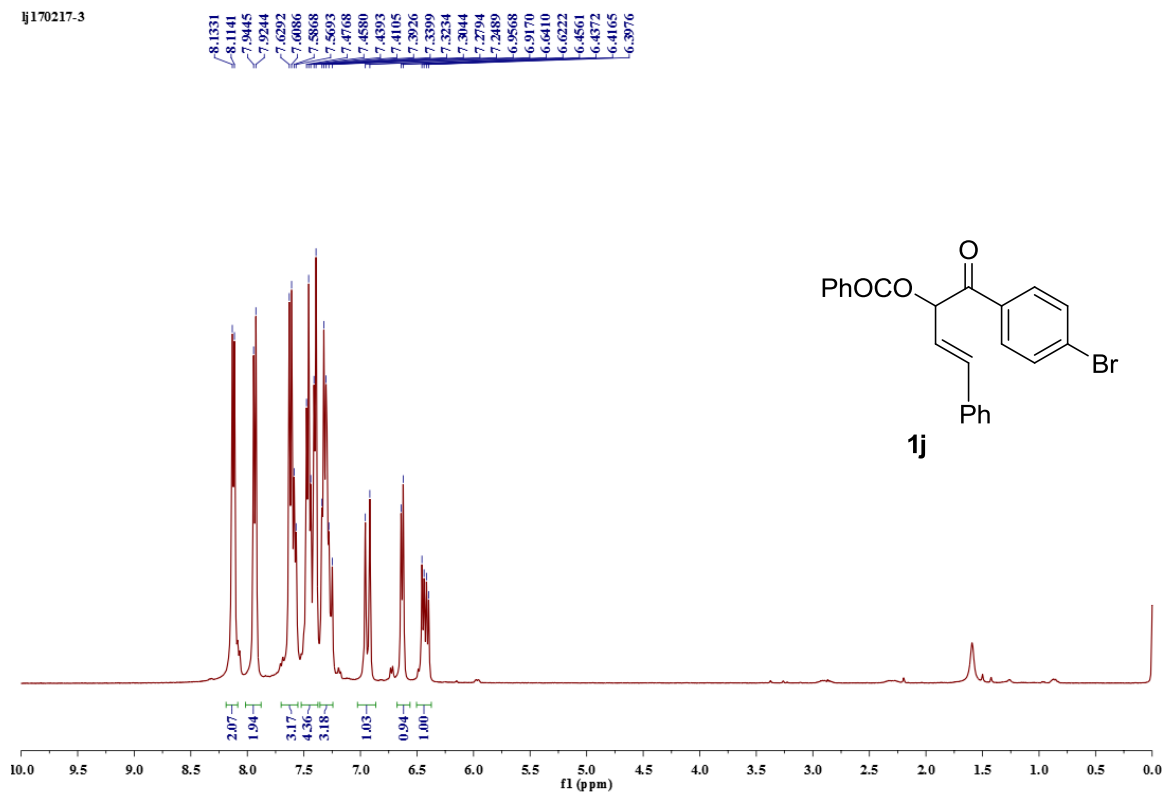

h170207-5

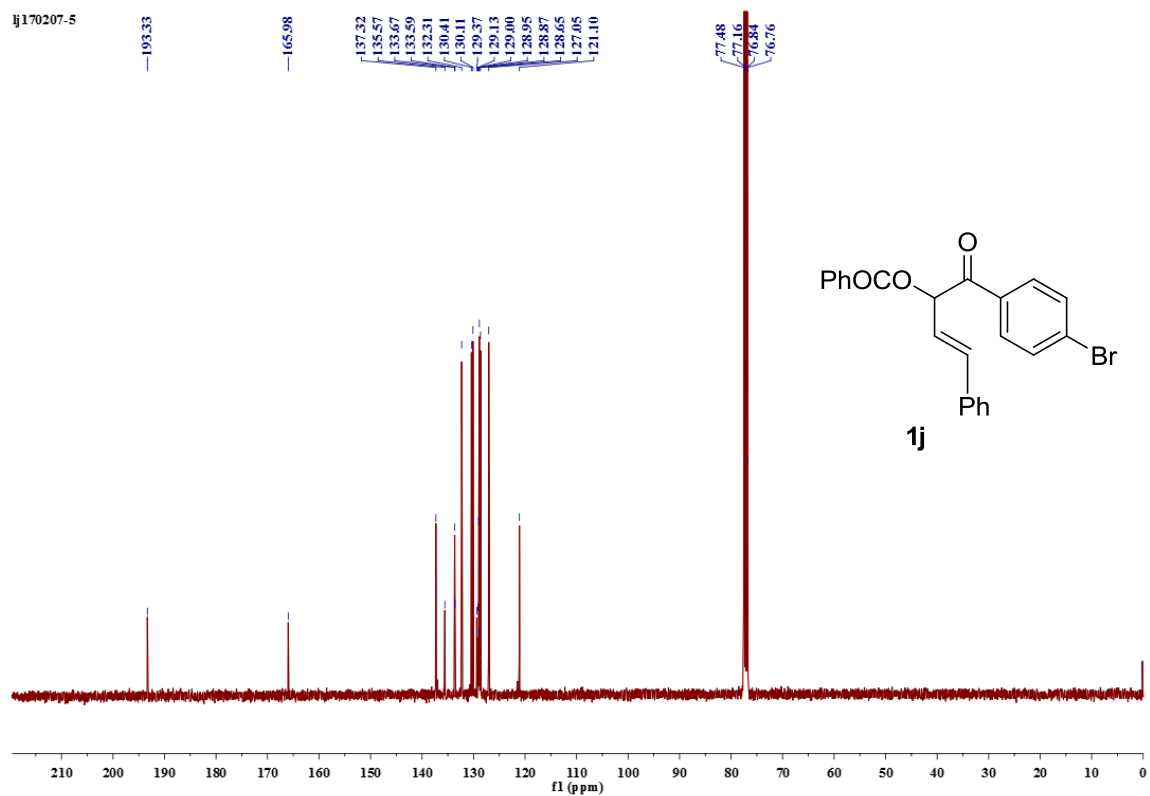

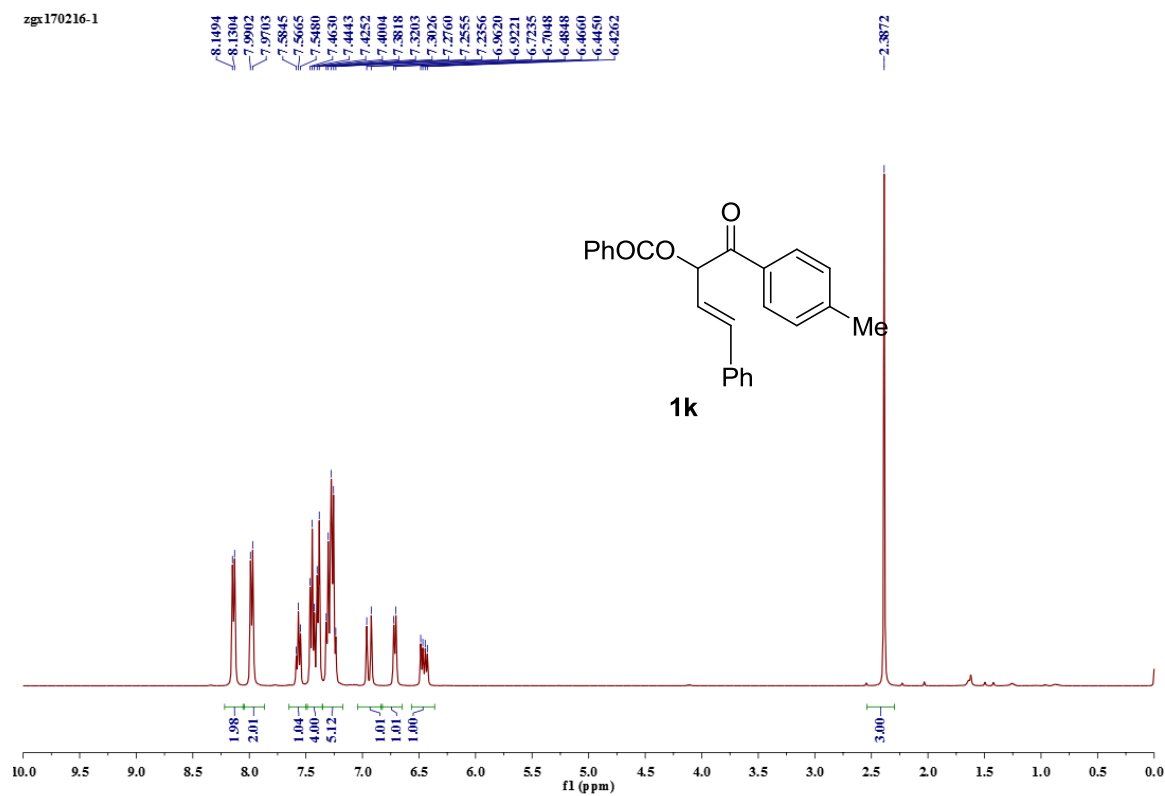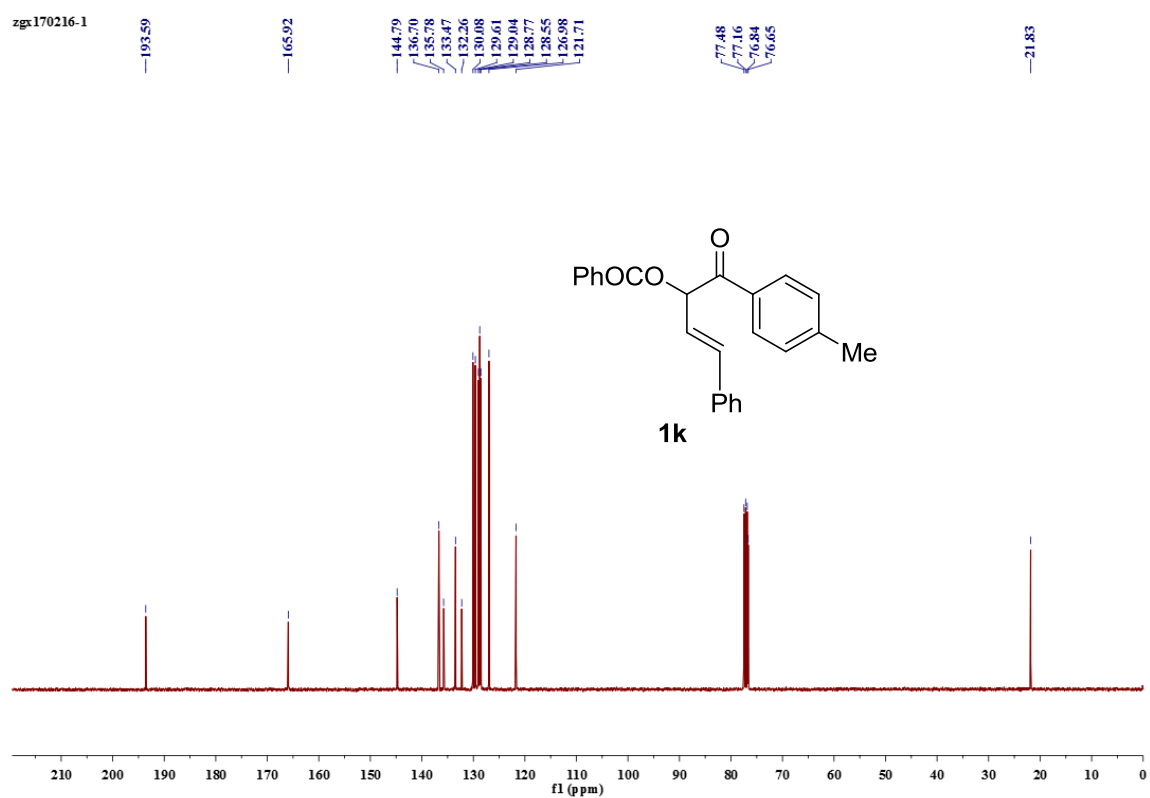

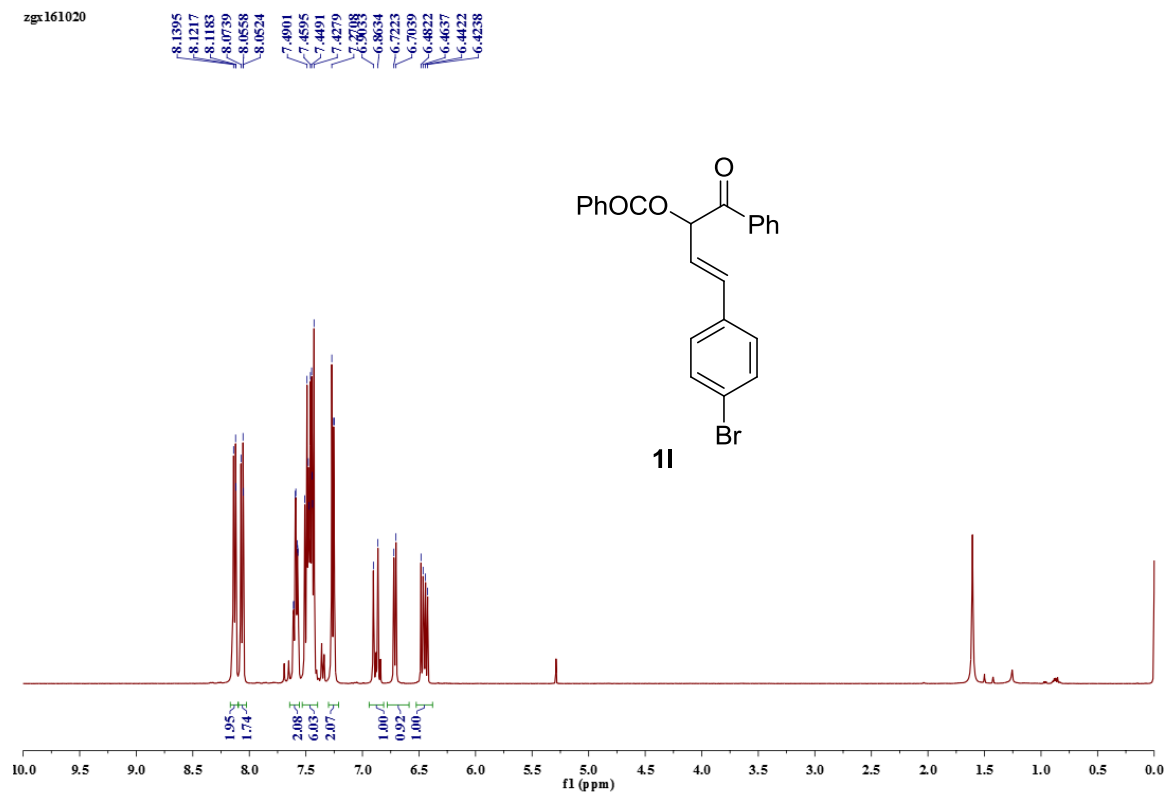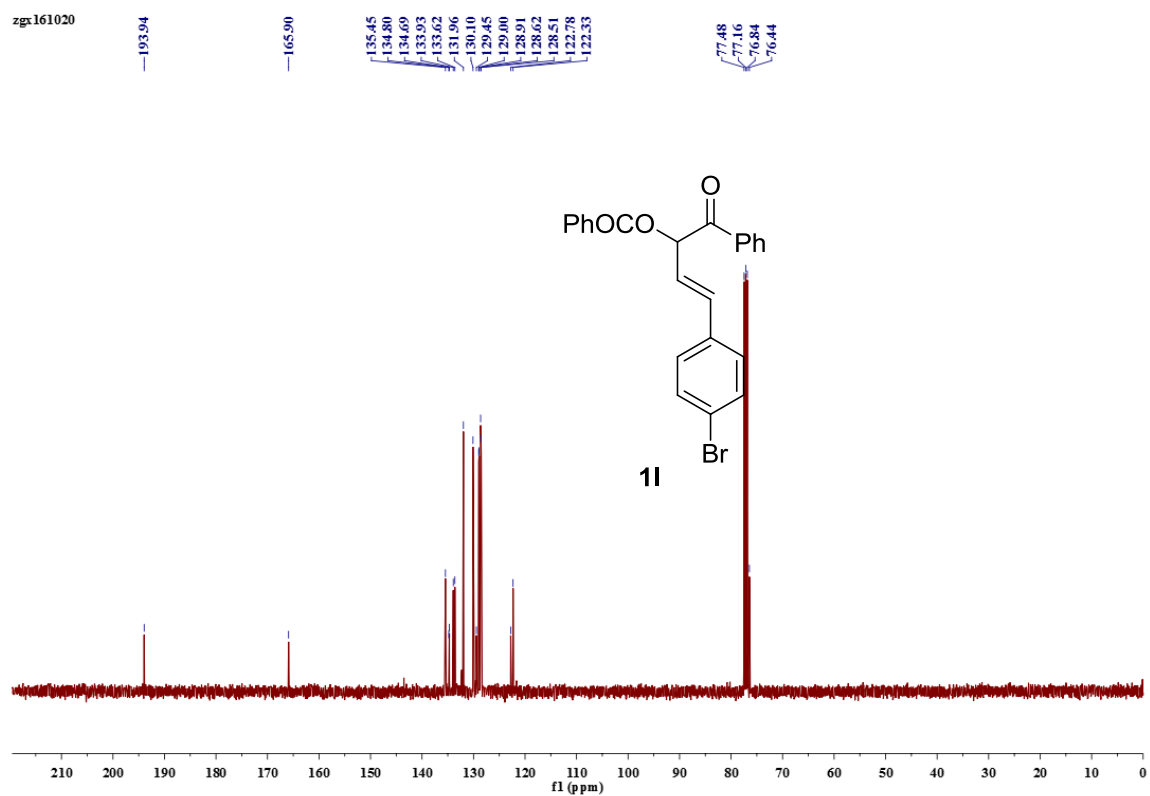

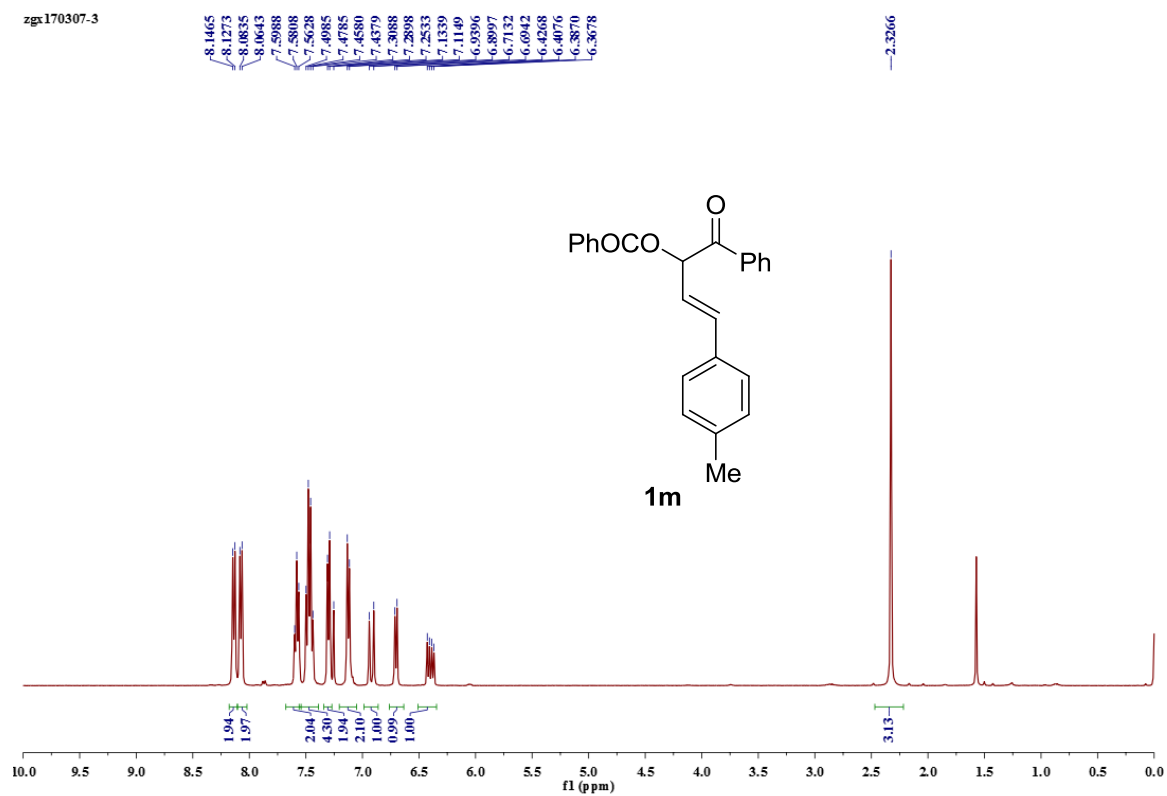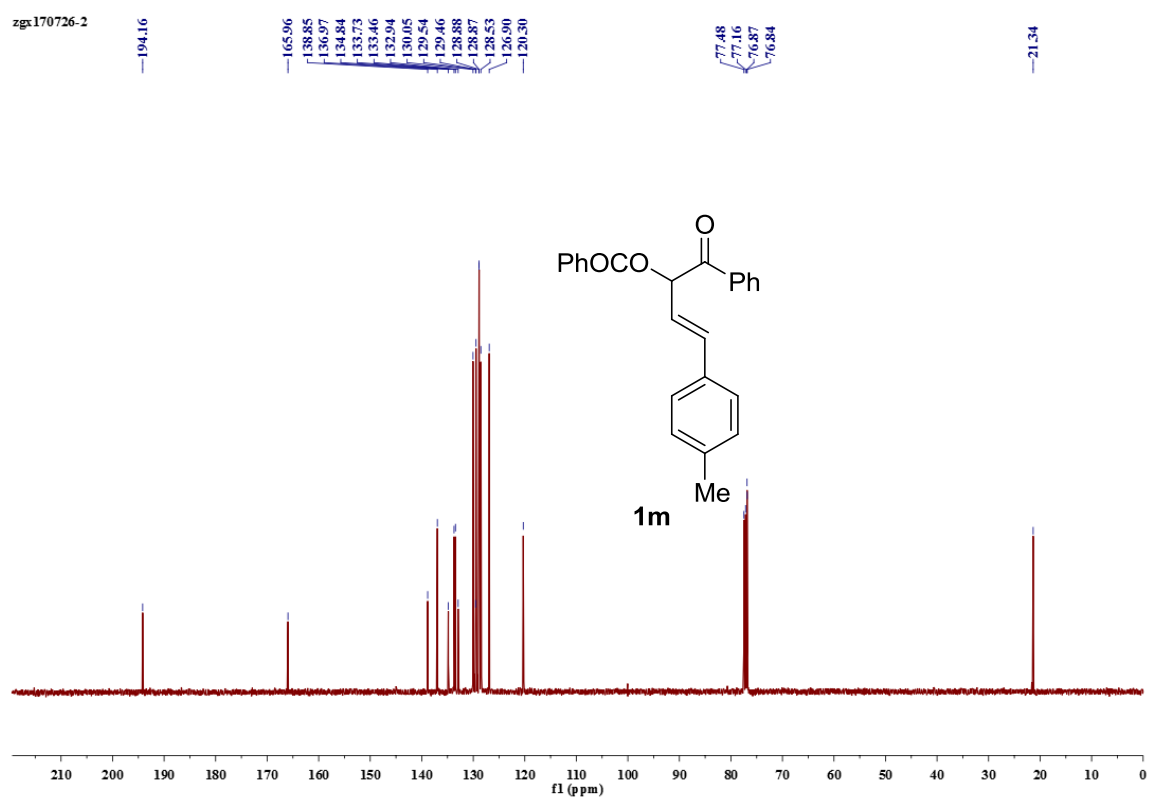

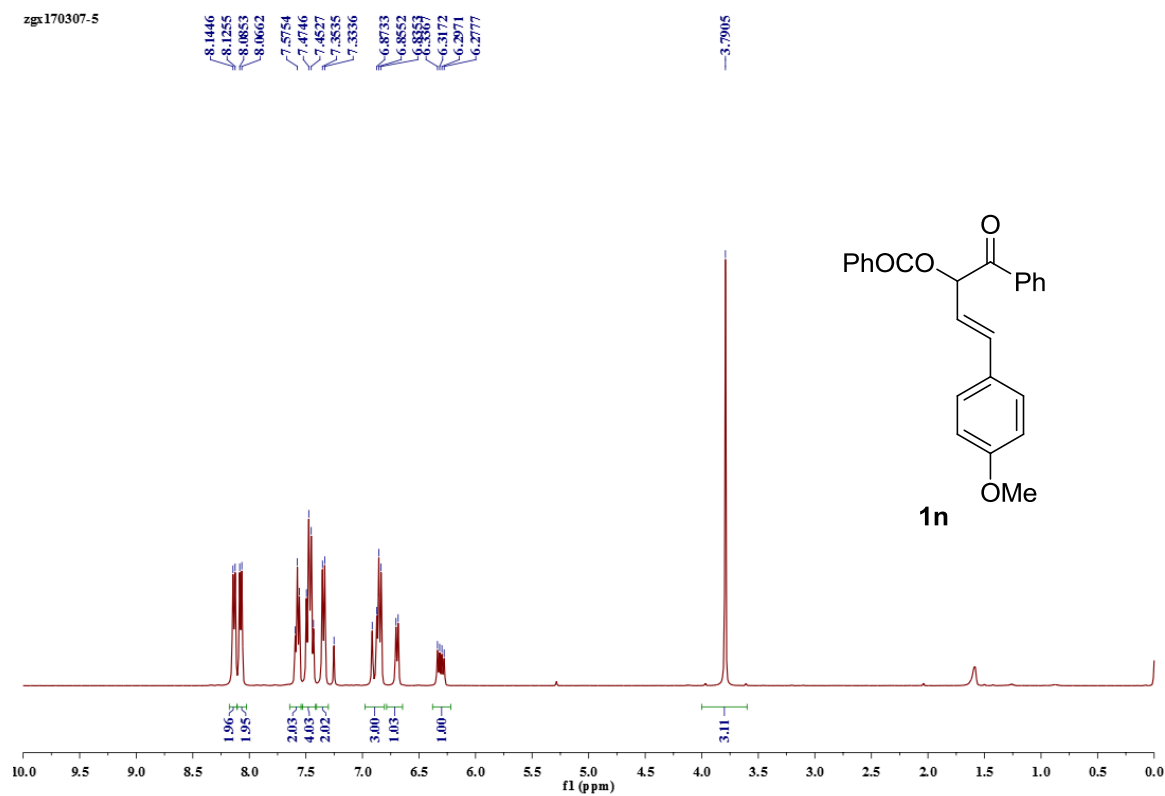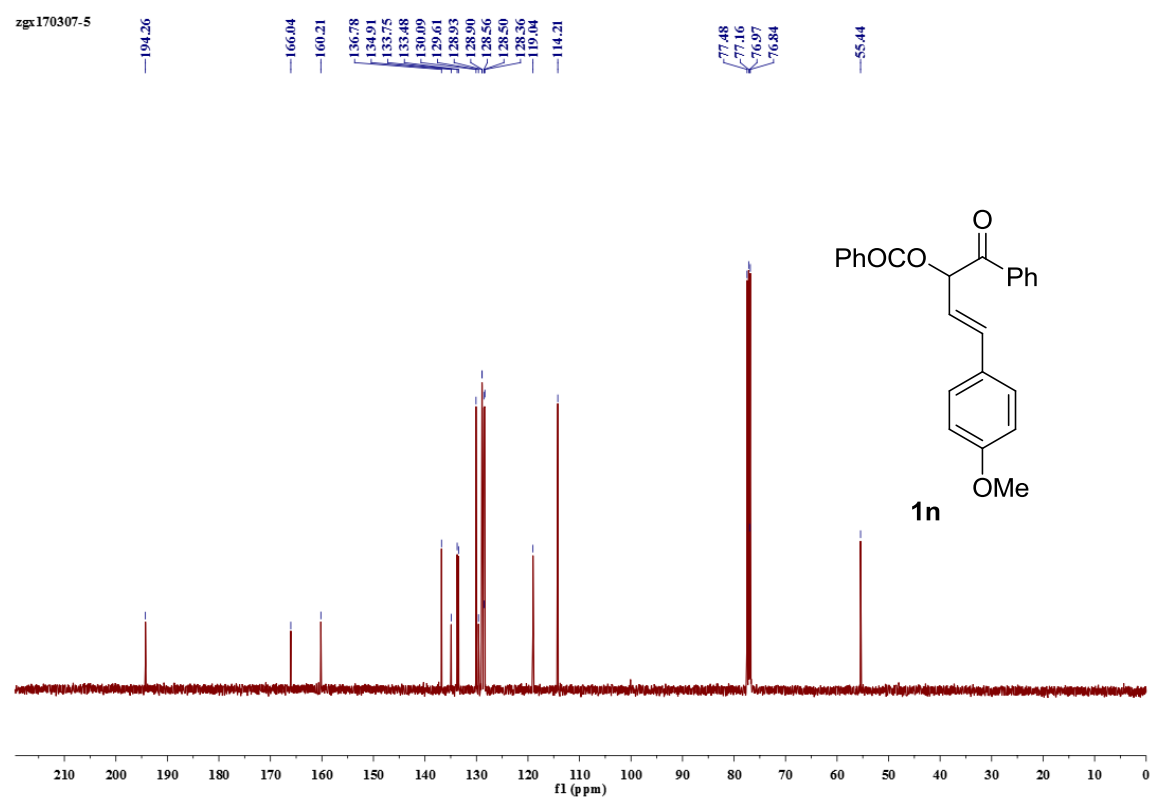

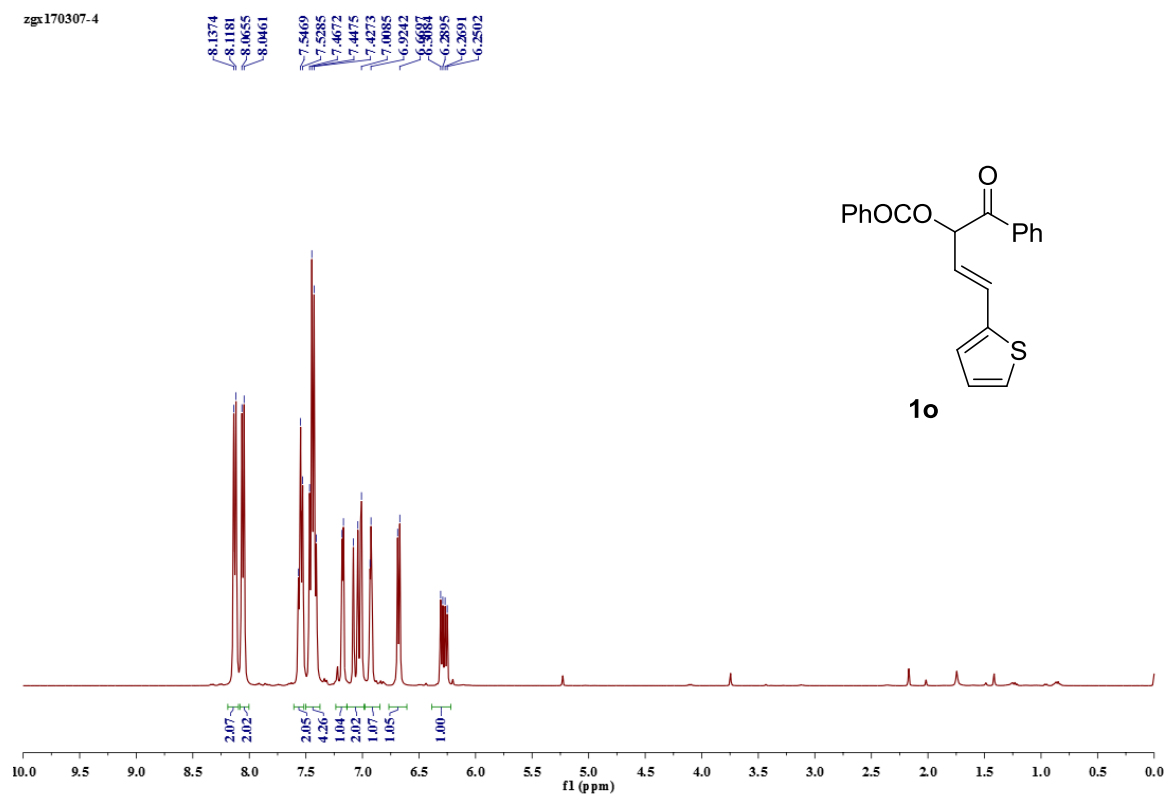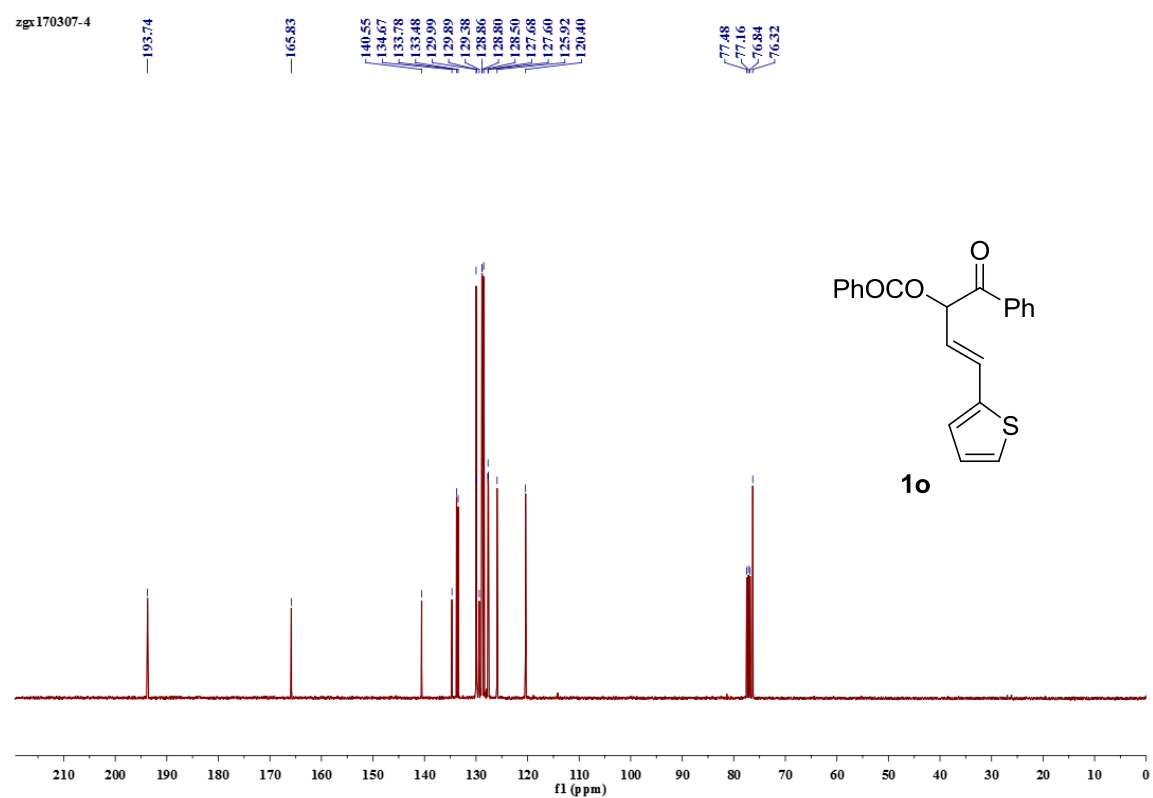

8.1317  
8.1124  
8.0181  
7.9984  
7.5966  
7.5783  
7.5603  
7.4693  
7.4504  
7.4306  
7.3046  
7.2857  
7.2437  
7.1344  
7.1154  
6.9244  
6.8847  
6.6303  
6.6110  
6.3997  
6.3804  
6.3599  
6.3407

—2.3239

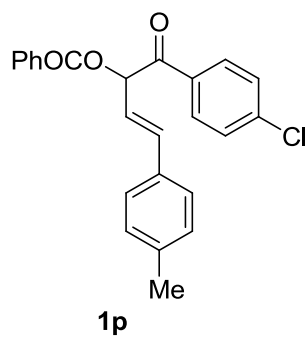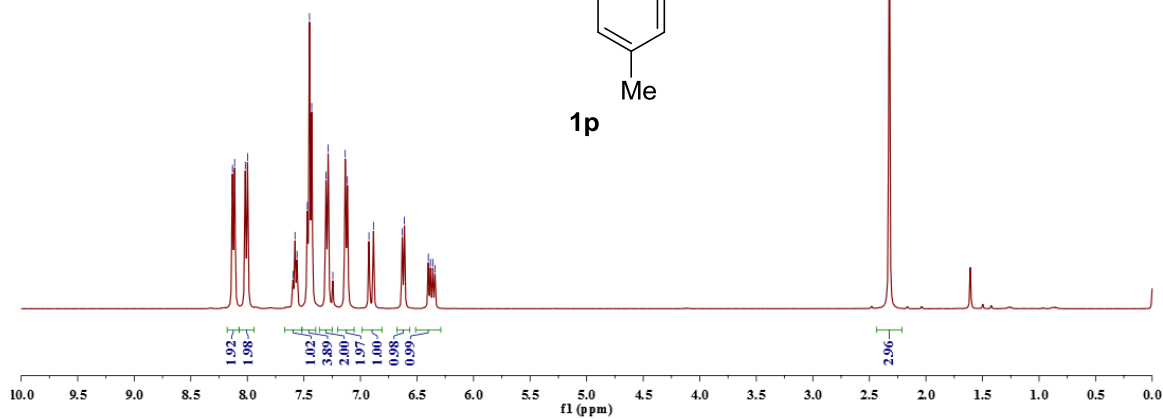

—193.17

—165.99

140.26

139.06

137.34

133.60

133.18

132.80

130.31

130.08

129.54

129.40

129.25

128.60

126.95

119.98

77.48  
77.16  
76.91  
76.84

—2139

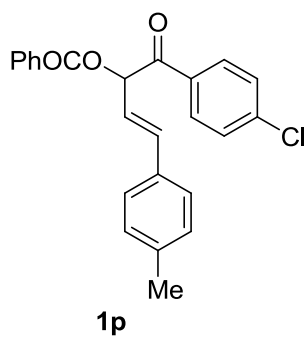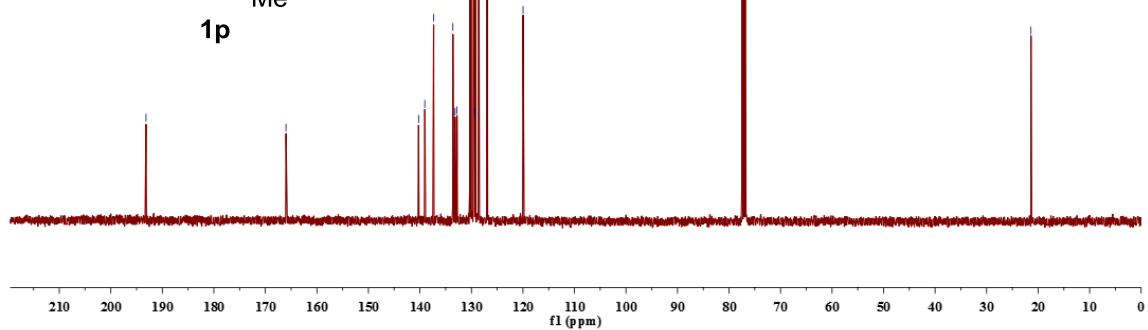

$\begin{array}{r} 8.1441 \\ 8.1264 \\ \hline 8.1230 \end{array}$ 
 $\begin{array}{r} 7.5007 \\ 7.4811 \\ \hline 7.4286 \end{array}$ 
 $\begin{array}{r} 7.4286 \\ 7.3564 \\ \hline 7.2570 \end{array}$ 
 $\begin{array}{r} 7.2570 \\ 6.9315 \\ \hline 6.8917 \end{array}$ 
 $\begin{array}{r} 6.3417 \\ 6.3230 \\ \hline 6.3019 \end{array}$ 
 $\begin{array}{r} 6.3019 \\ 6.2832 \\ \hline 5.8656 \end{array}$ 
 $\begin{array}{r} 5.8656 \\ 5.8469 \\ \hline \end{array}$

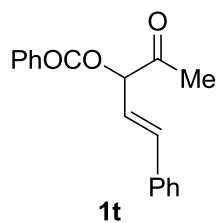

—202.66

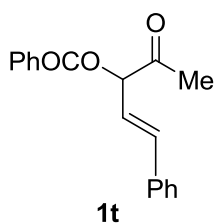

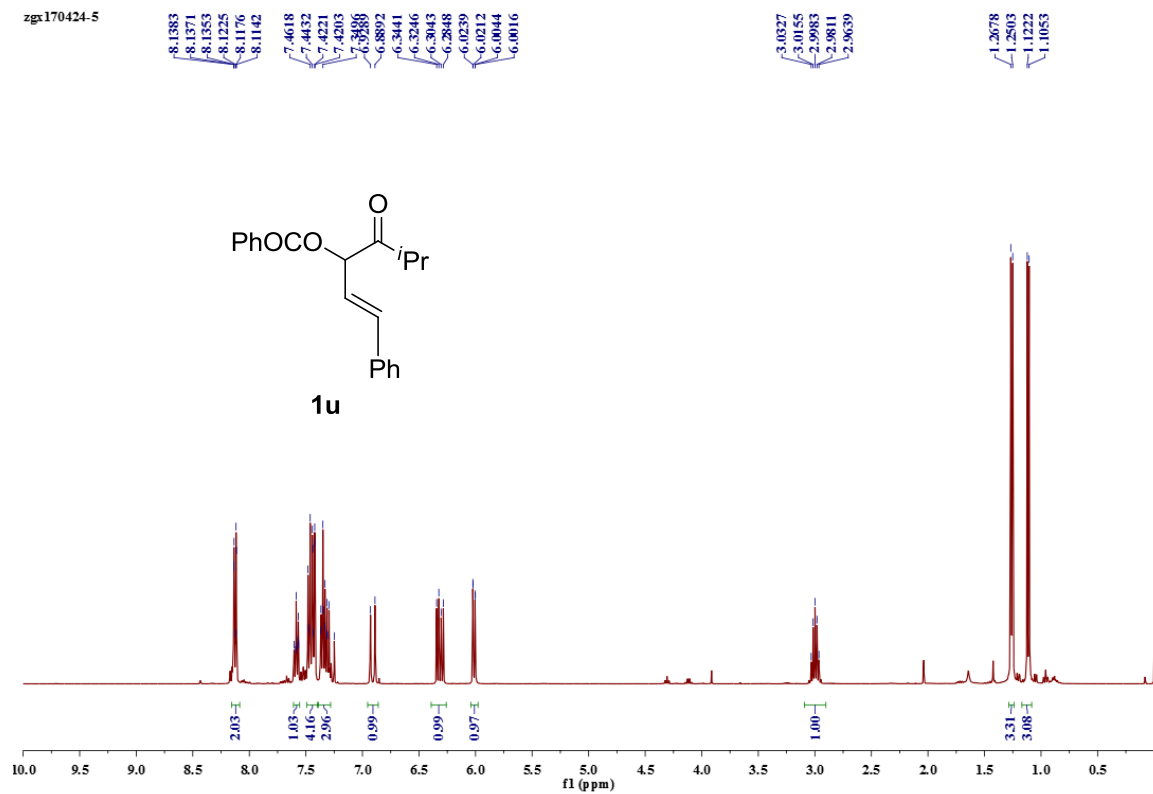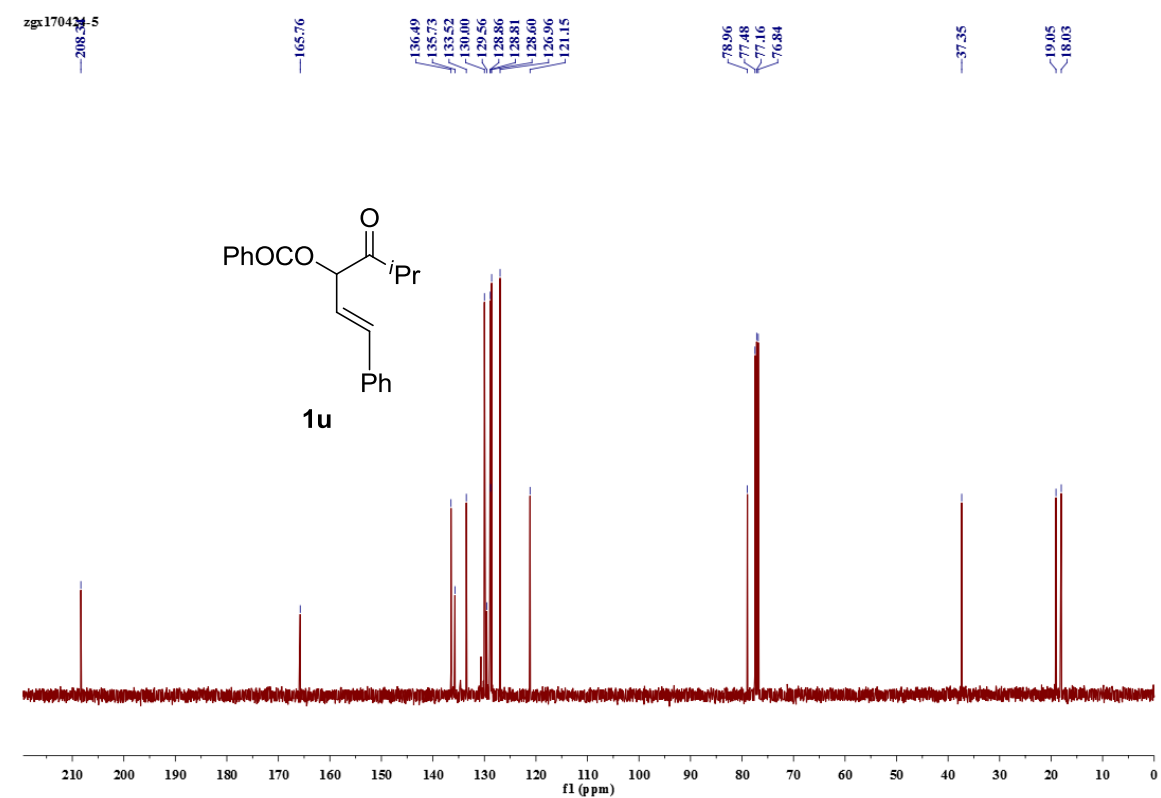

zgx170518-1

8.0214  
8.0081  
8.0034  
8.0000  
7.4857  
7.4660  
7.3519  
7.3493  
7.2981  
7.2881  
6.8384  
6.5024  
6.4833  
6.3434  
6.3244  
6.3036  
6.2846

2.2010

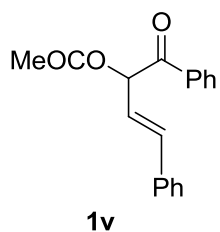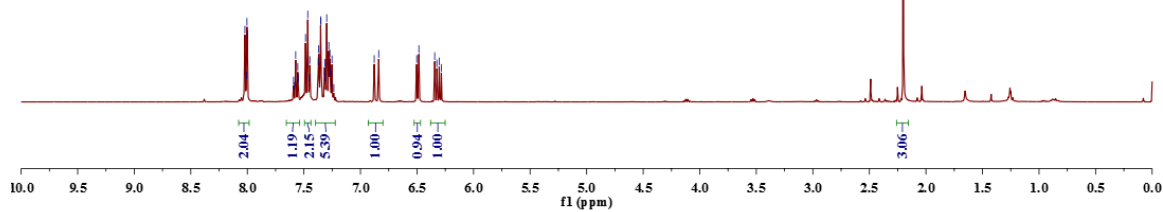

zgx170518-1

194.16

170.33

136.82  
135.66  
134.73  
133.80  
128.89  
128.84  
128.80  
128.77  
126.94  
121.26

77.48  
77.16  
76.84  
76.28

20.90

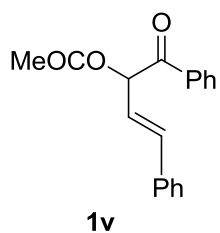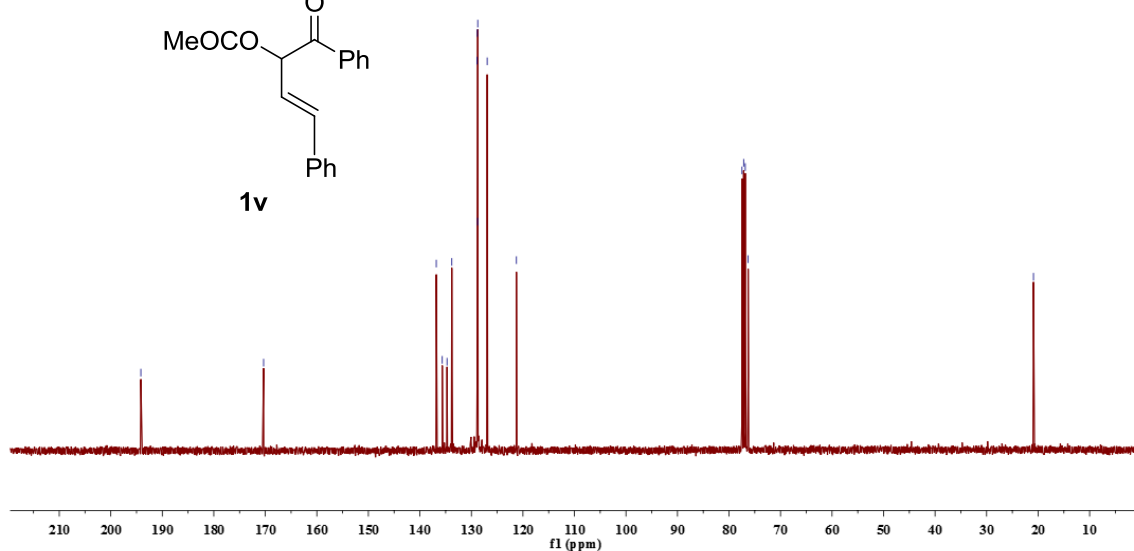

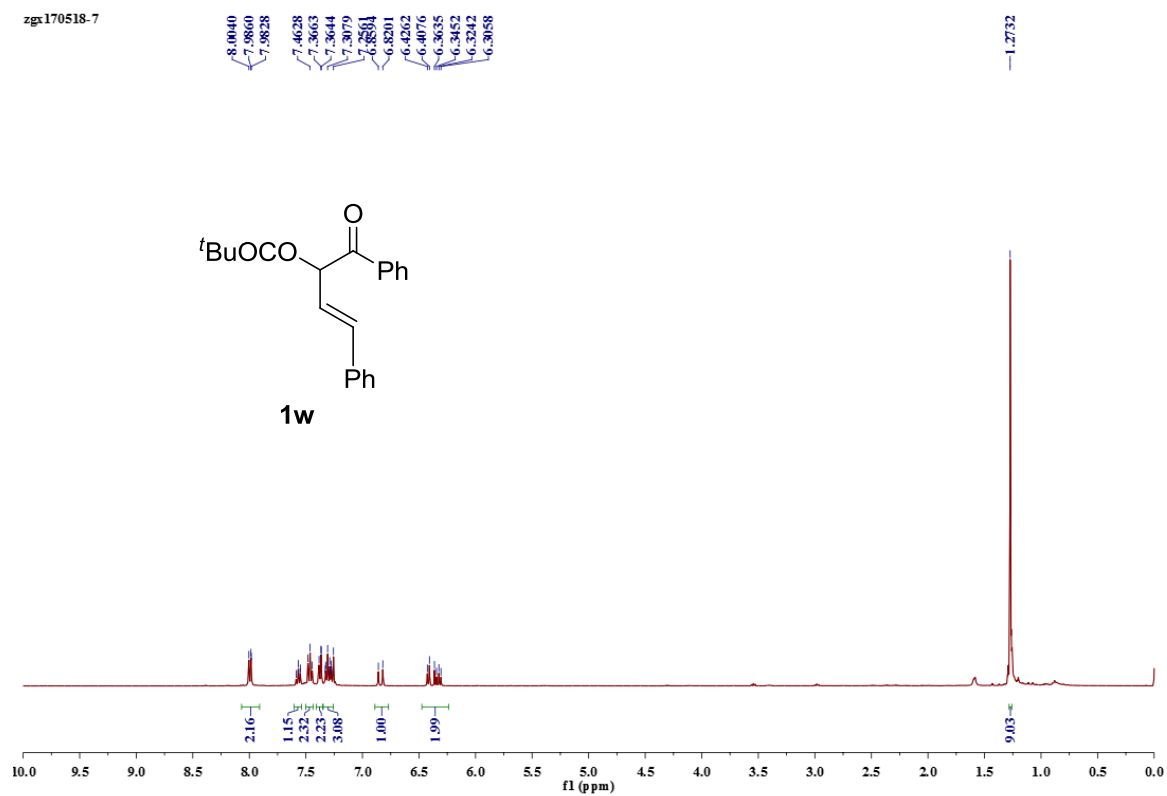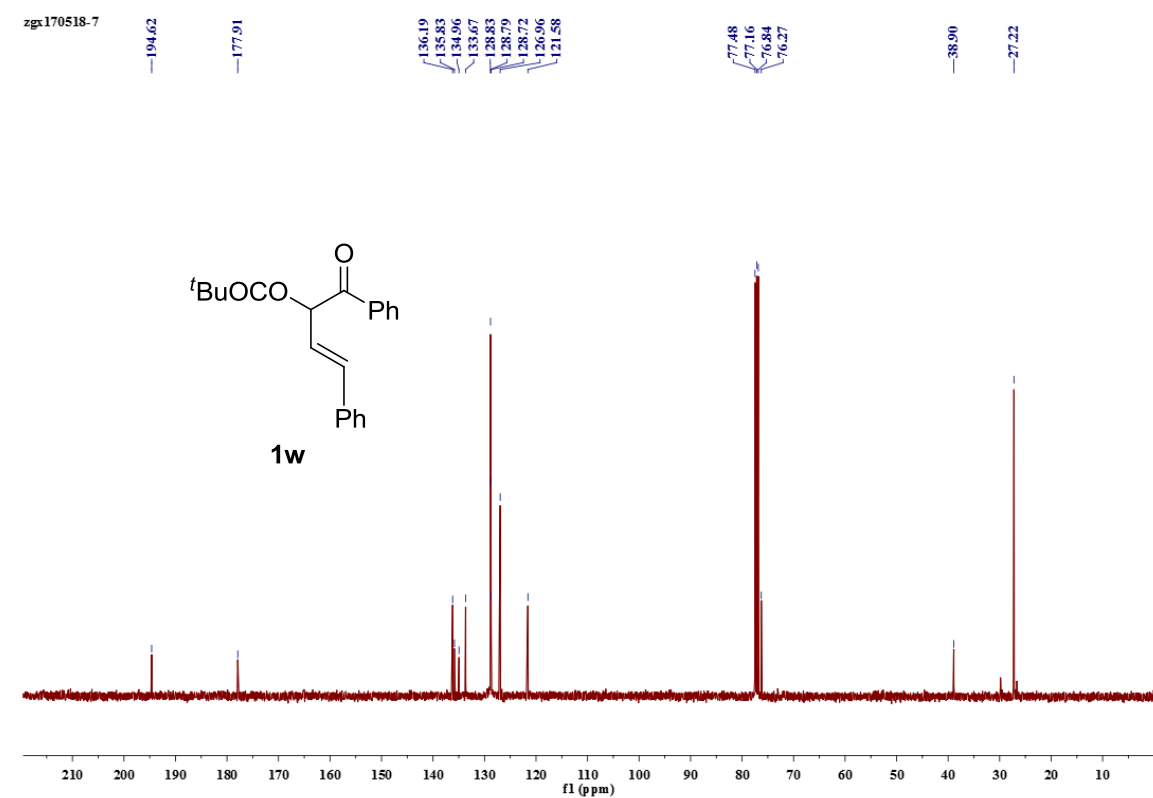

zgx170518-5

8.0296  
8.0111  
7.4771  
7.3489  
7.2996  
7.2798  
6.9746  
6.8755  
6.3871  
6.3681  
6.3356  
6.3170  
6.2965  
6.2778  
4.2601  
4.2423  
4.2245  
4.2067  
1.3381  
1.3203  
1.3025

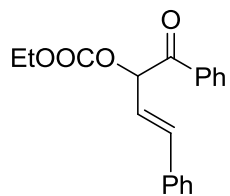

1x

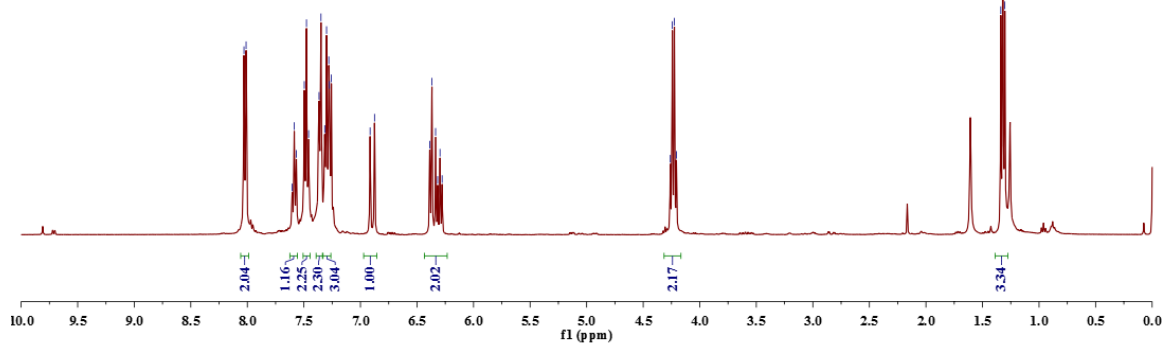

zgx170518-5

193.88  
154.50  
137.07  
135.59  
134.59  
133.91  
128.94  
128.91  
128.88  
128.79  
127.00  
120.74  
79.02  
77.48  
77.16  
76.84  
64.84  
14.32

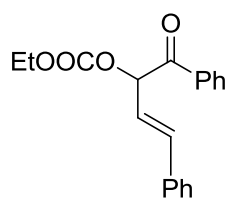

1x

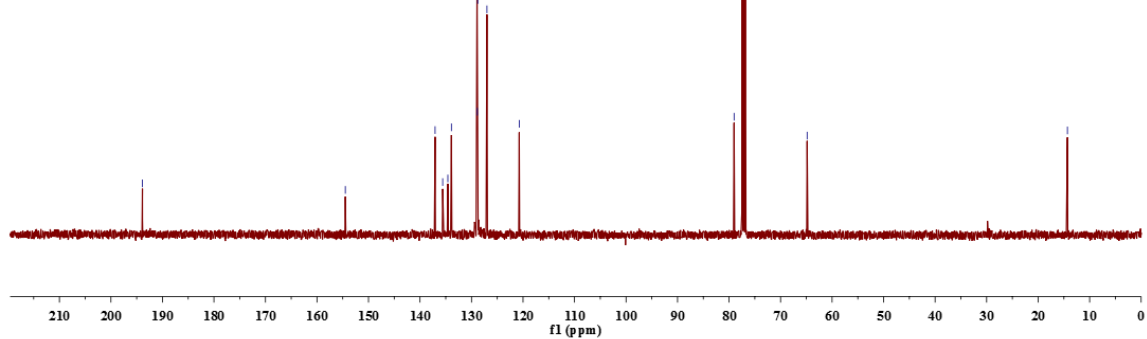

zgx170518-3

8.03  
8.01  
8.00  
7.47  
7.34  
7.34  
7.29  
6.90  
6.86  
6.85  
6.31  
6.30  
6.28

1.48

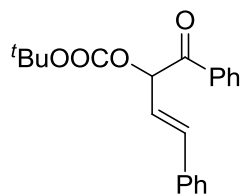

1y

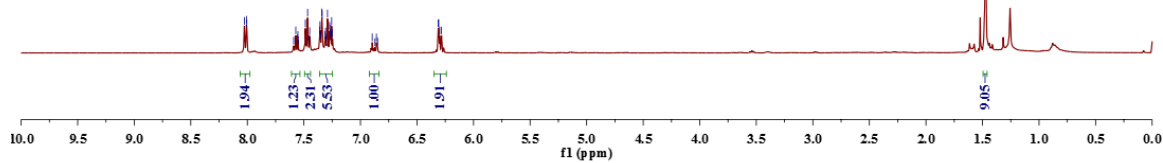

zgx170518-3

194.36

152.78

136.81  
135.70  
134.73  
133.76  
128.88  
128.77  
126.97  
120.97

83.40  
78.56  
77.48  
77.16  
76.84

27.81

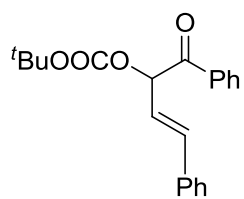

1y

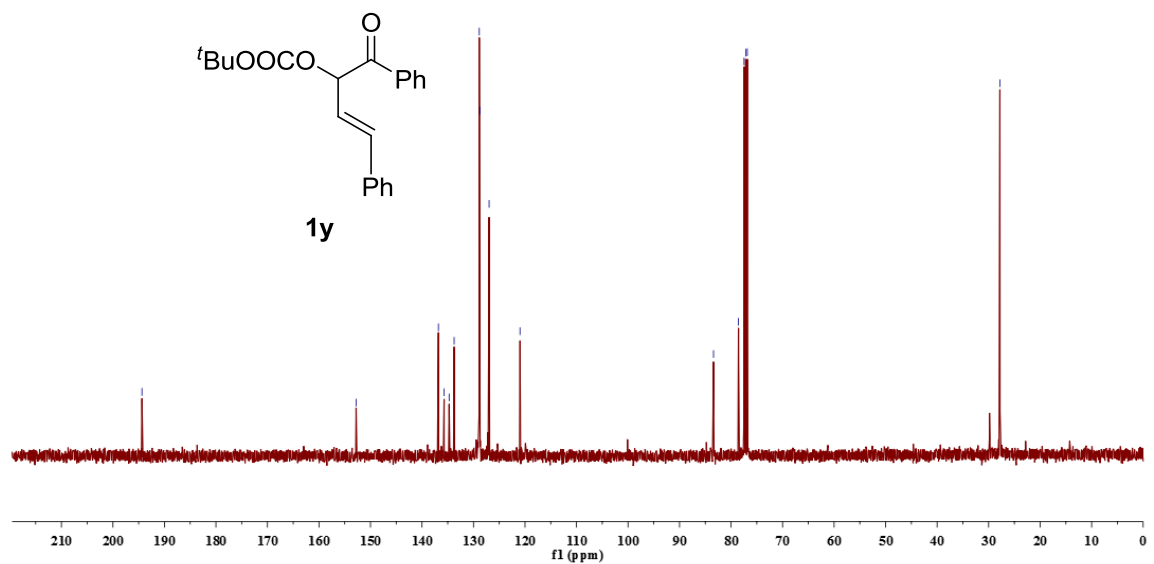

zgx170307-1

7.9614  
7.9418  
7.4557  
7.4360  
7.3854  
7.3113  
6.8260  
6.8260  
6.4223  
6.4030  
6.3132  
6.2941  
6.2736  
6.2544

2.1993

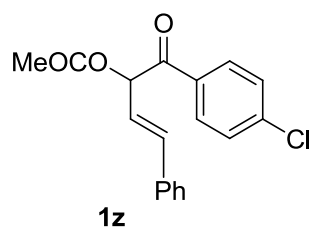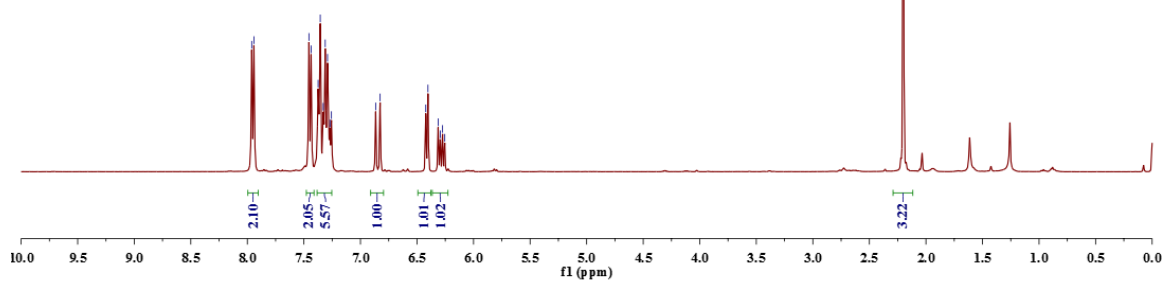

zgx170307-1

193.16

170.37

140.34  
137.19  
135.51  
133.06  
130.26  
129.27  
128.96  
128.84  
126.98  
120.92

77.48  
77.16  
76.84  
76.29

20.88

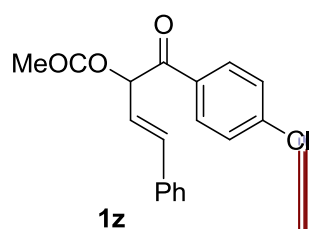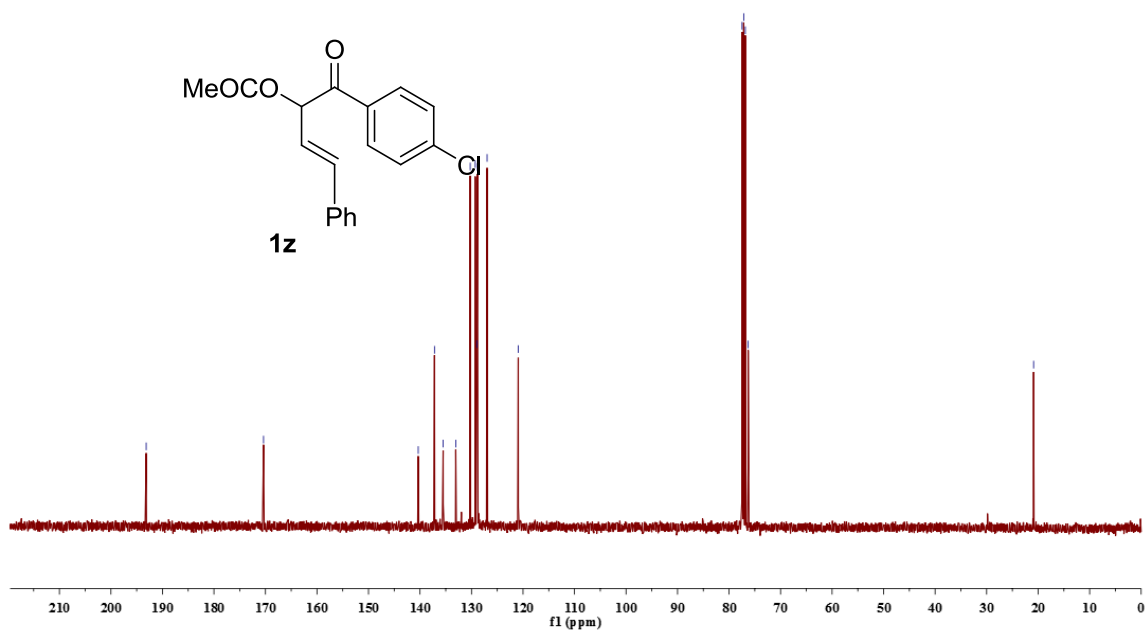

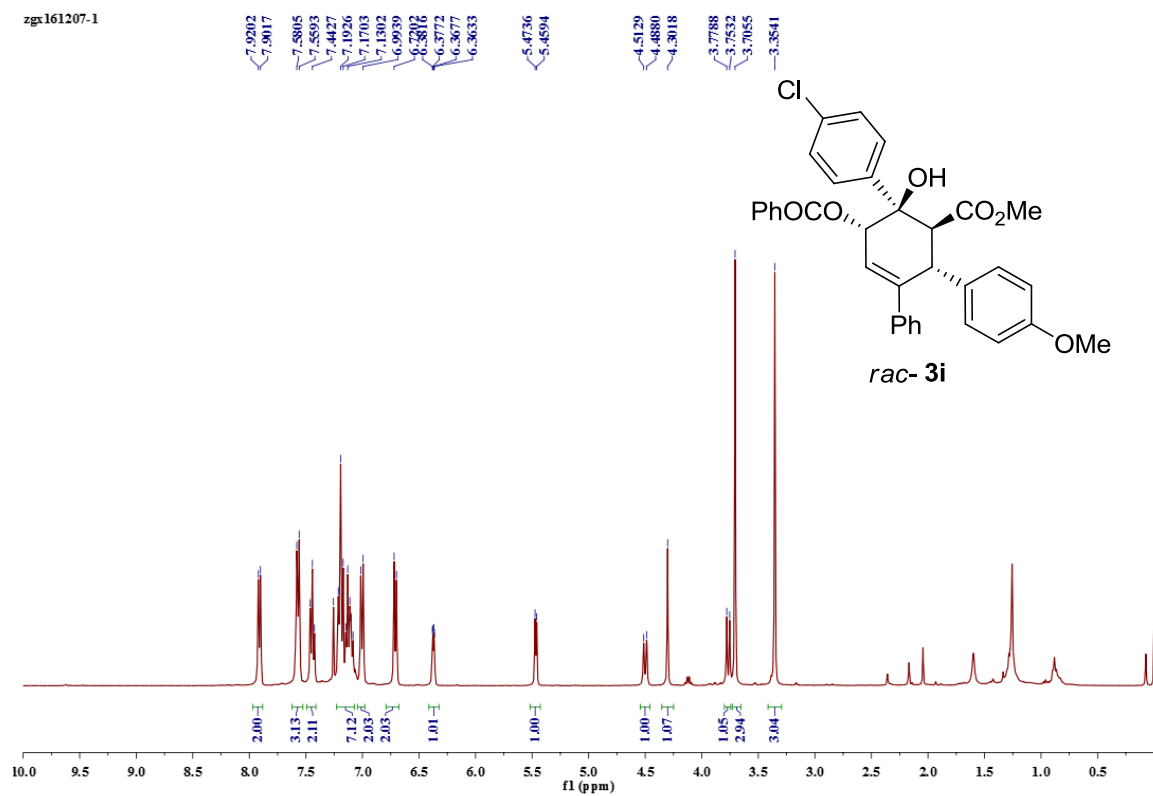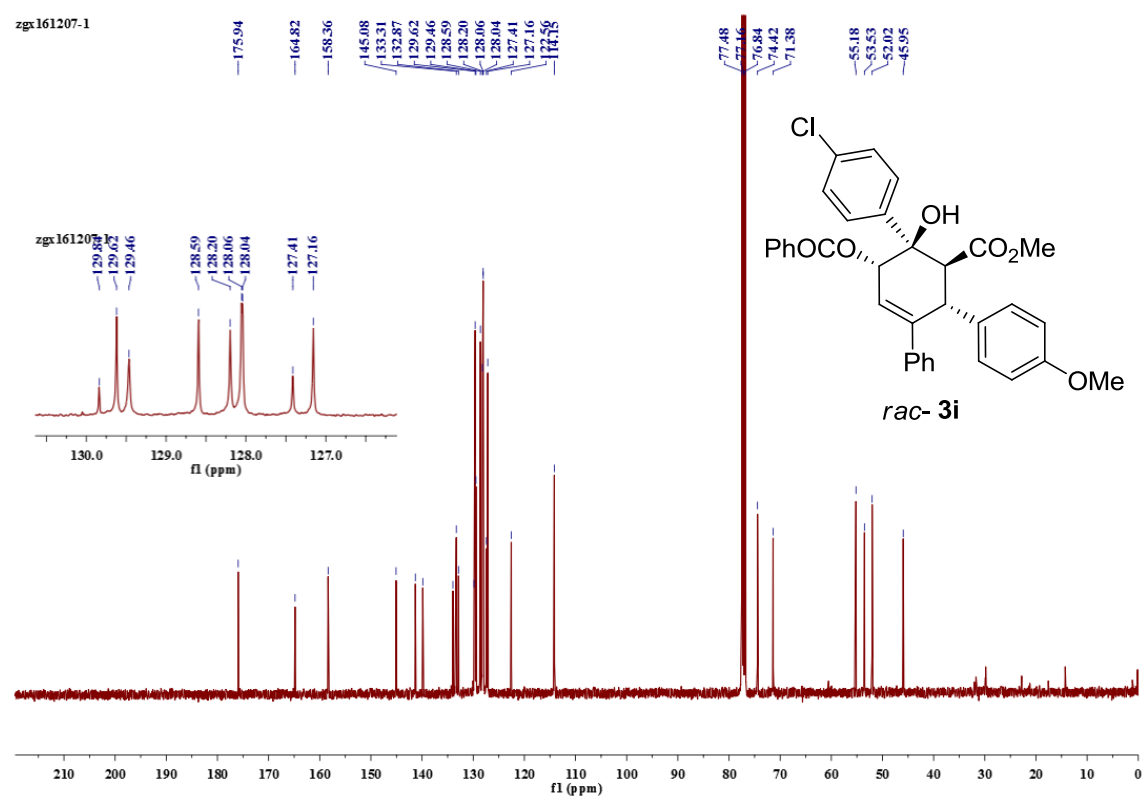

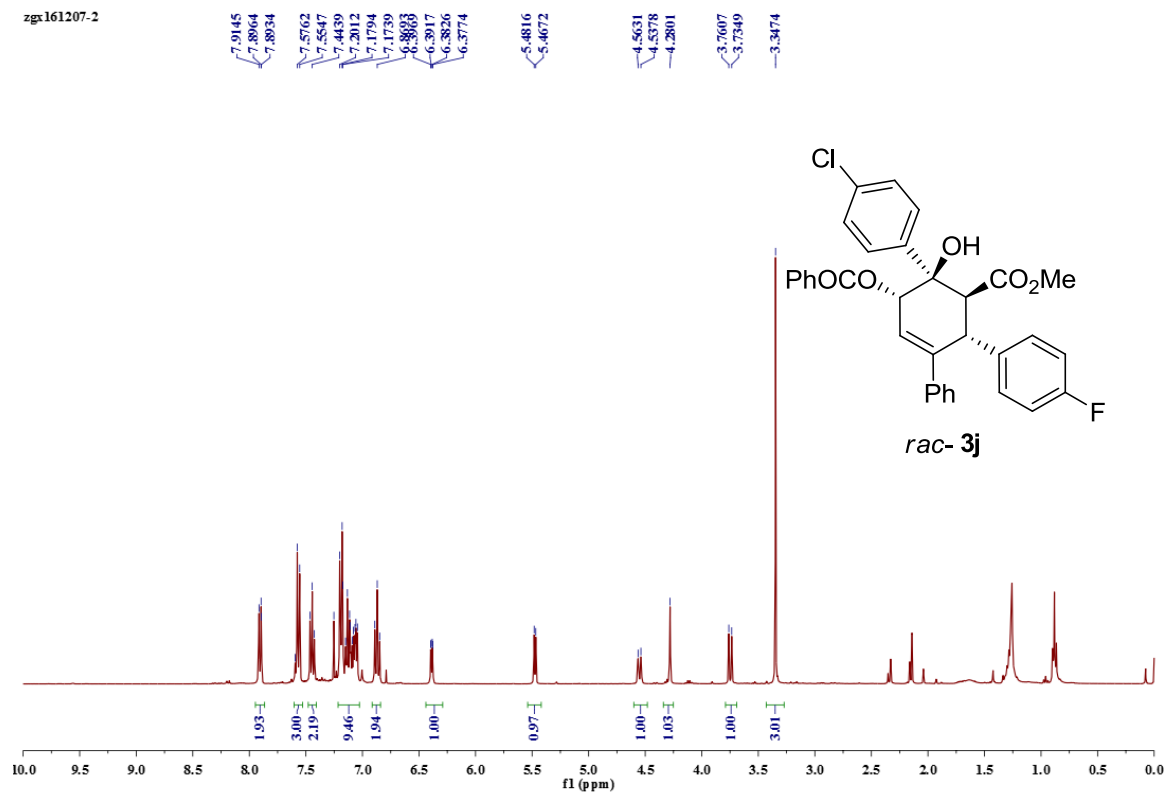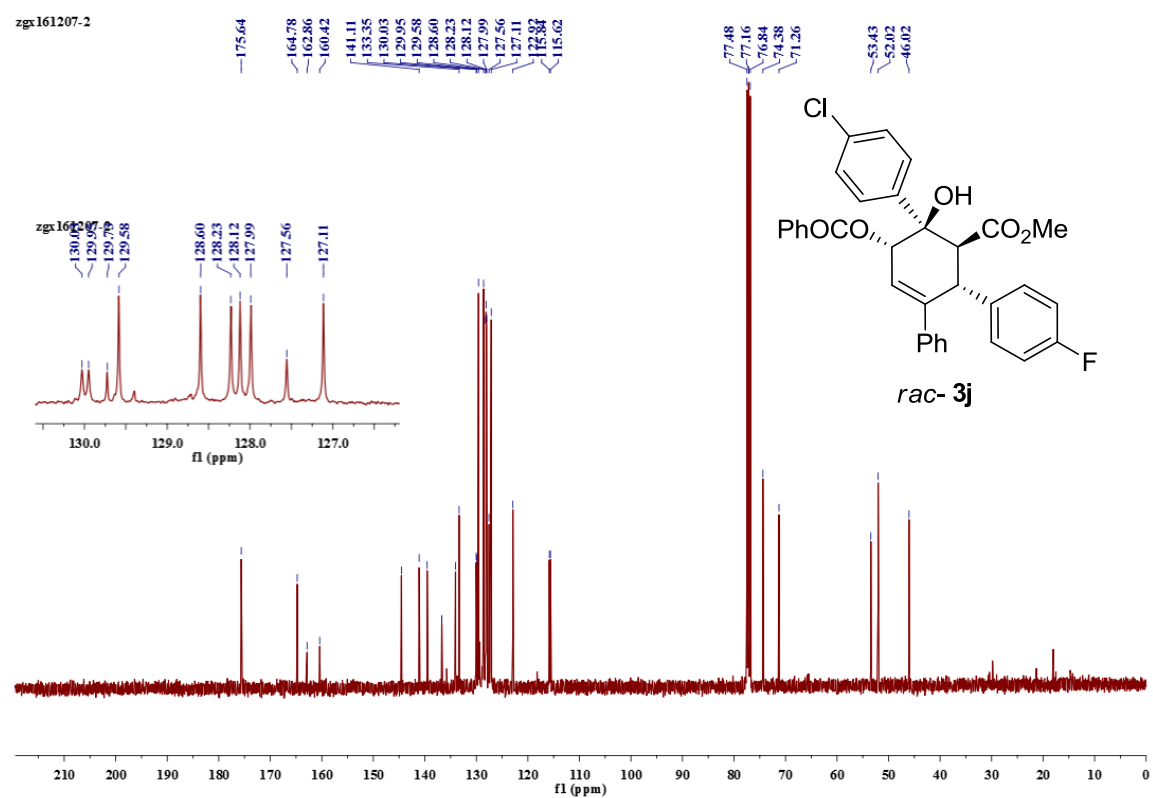

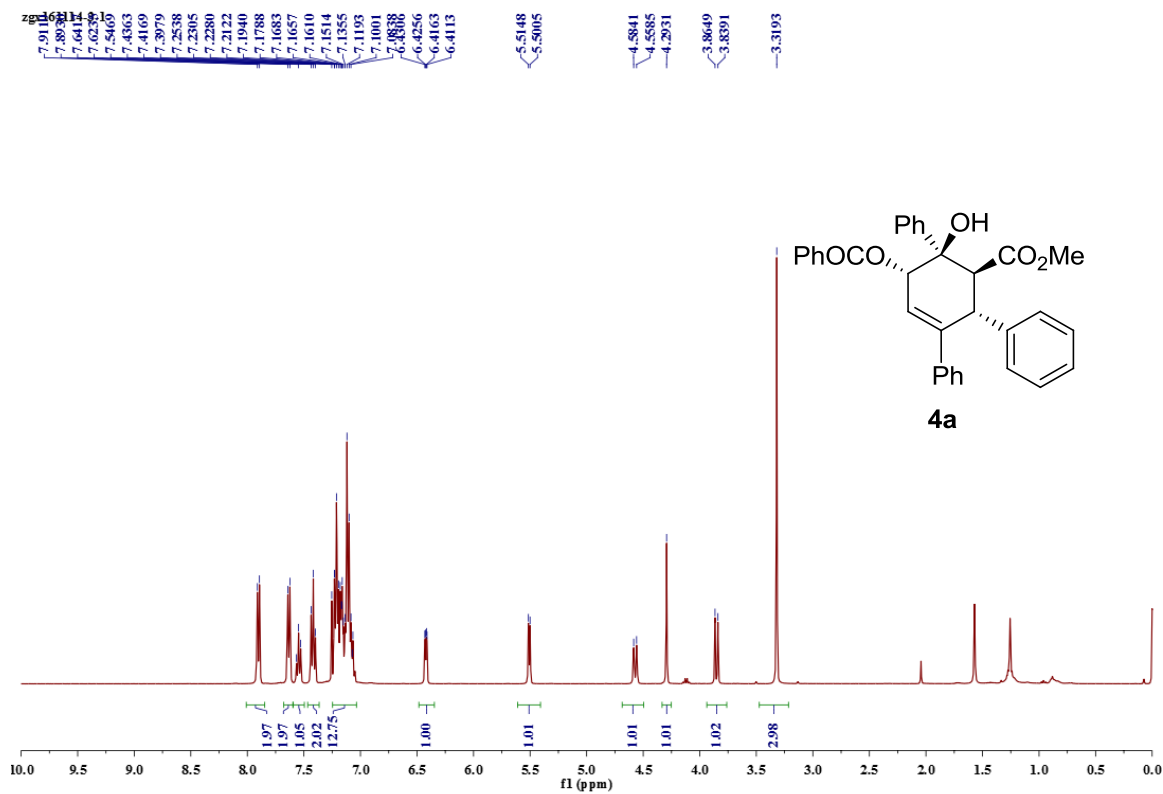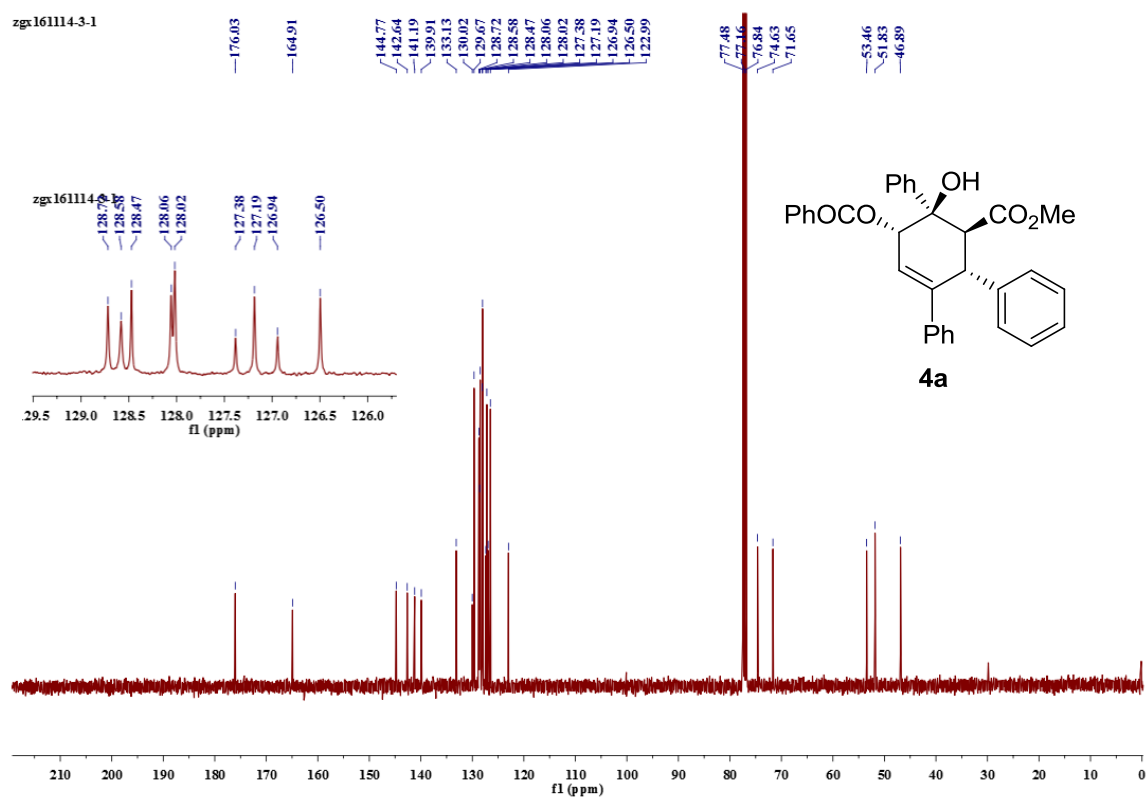

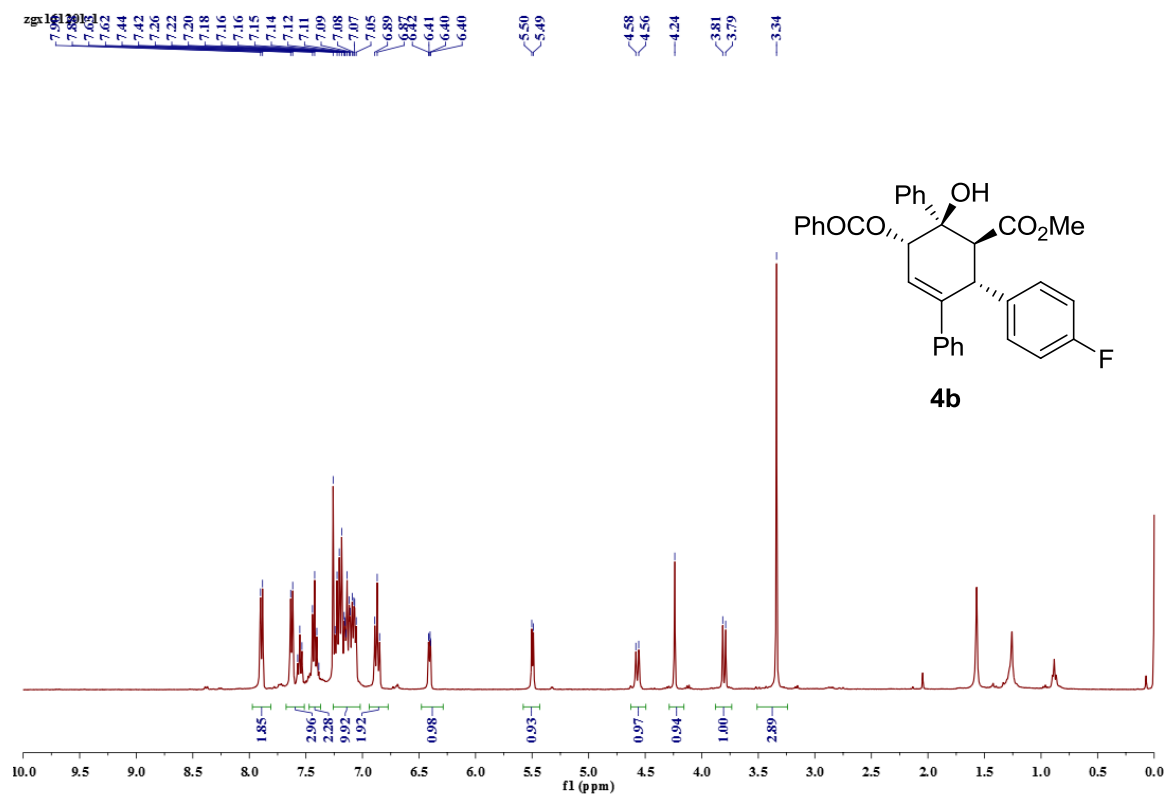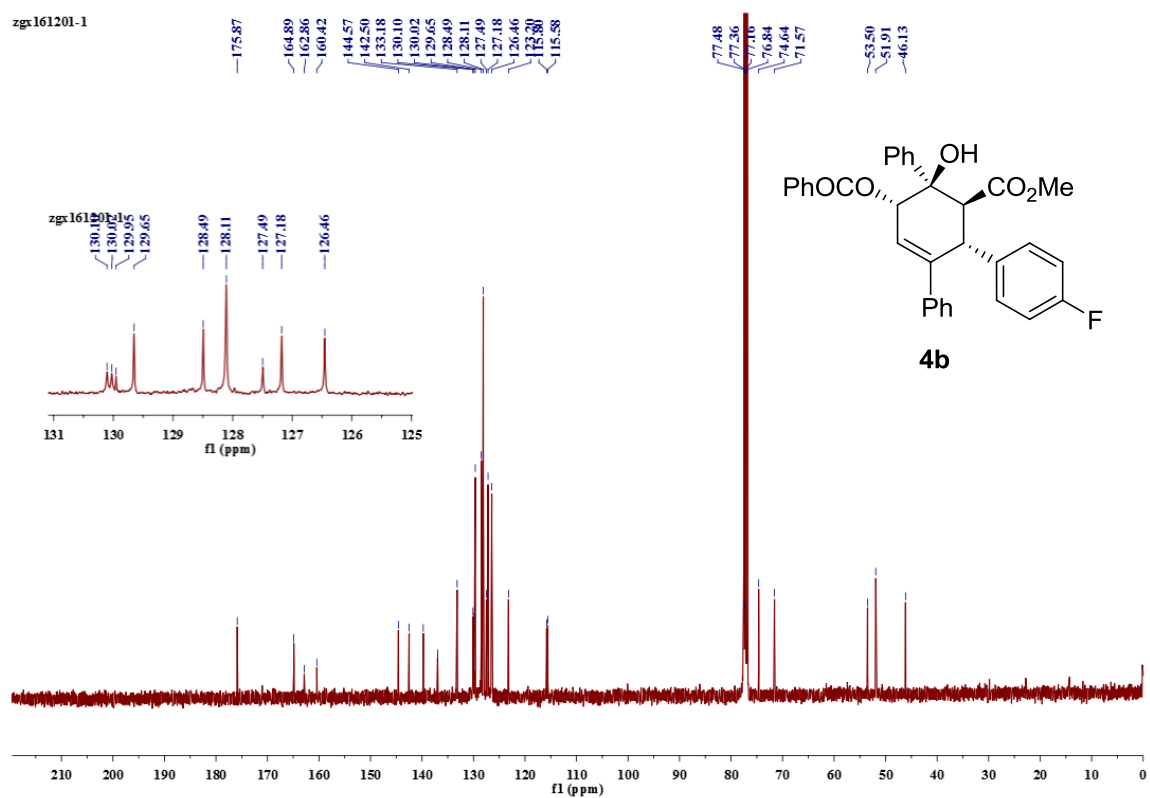

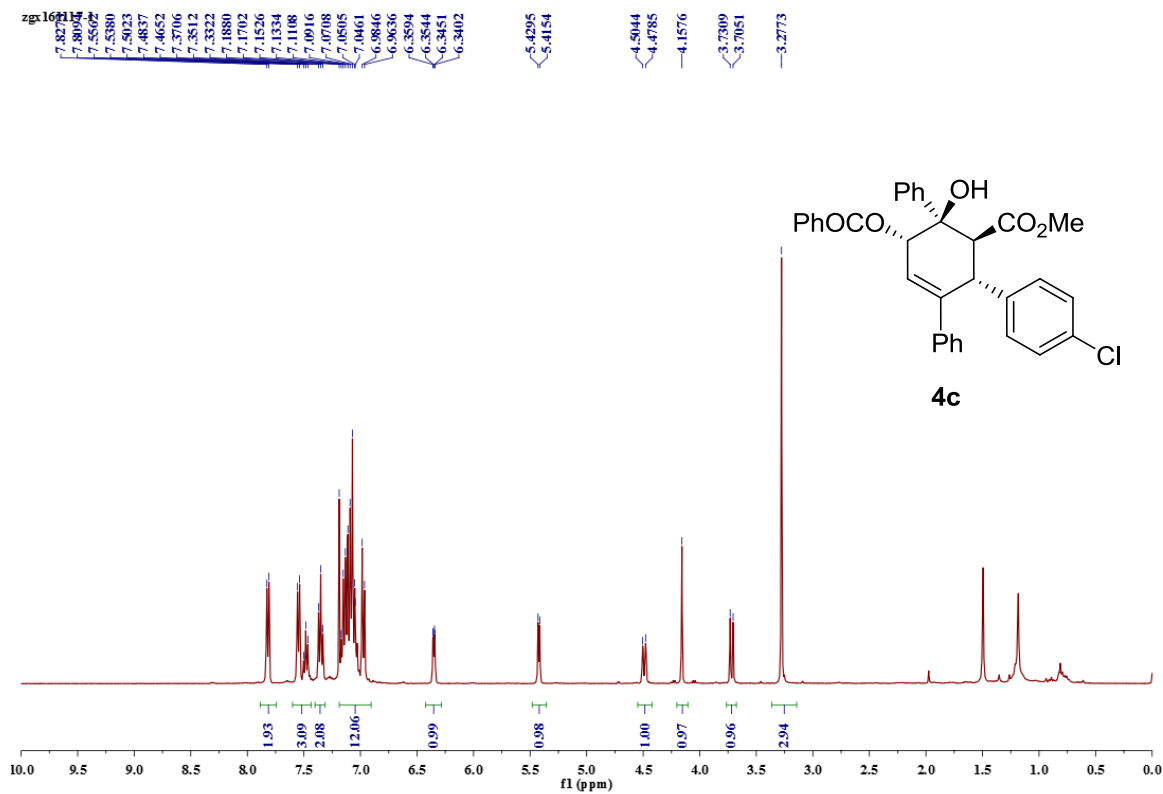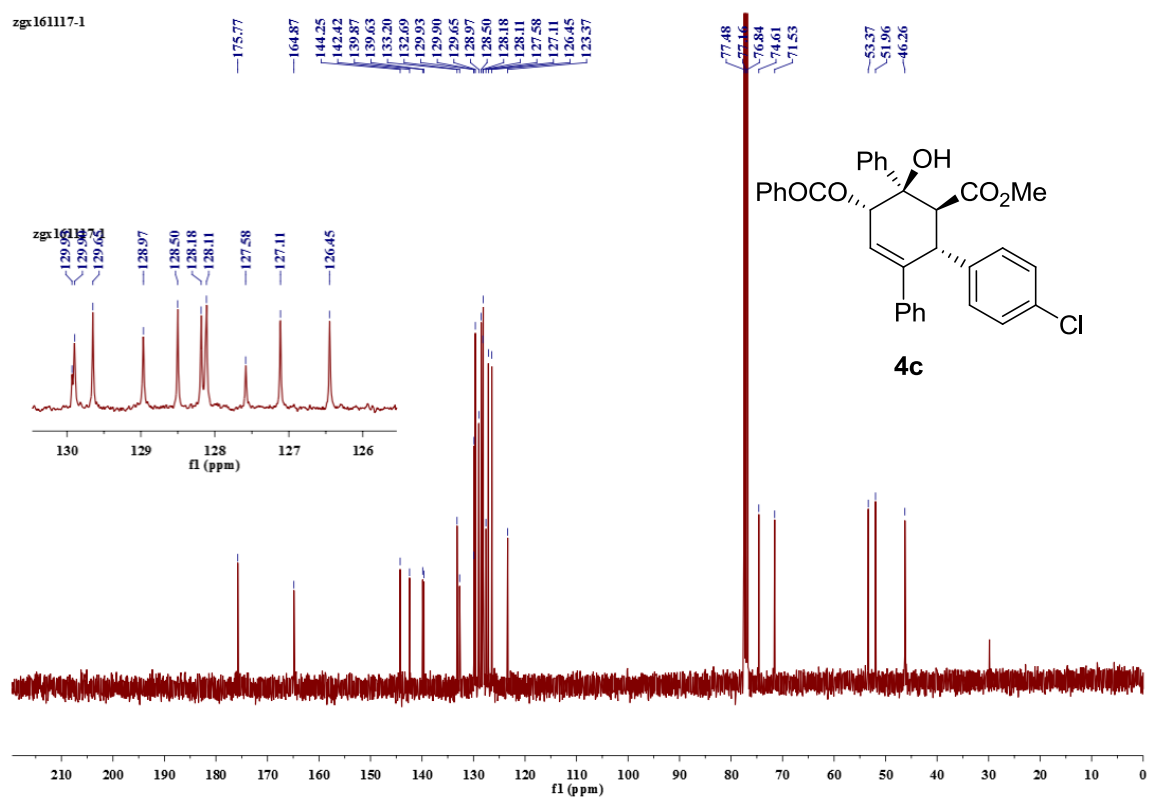

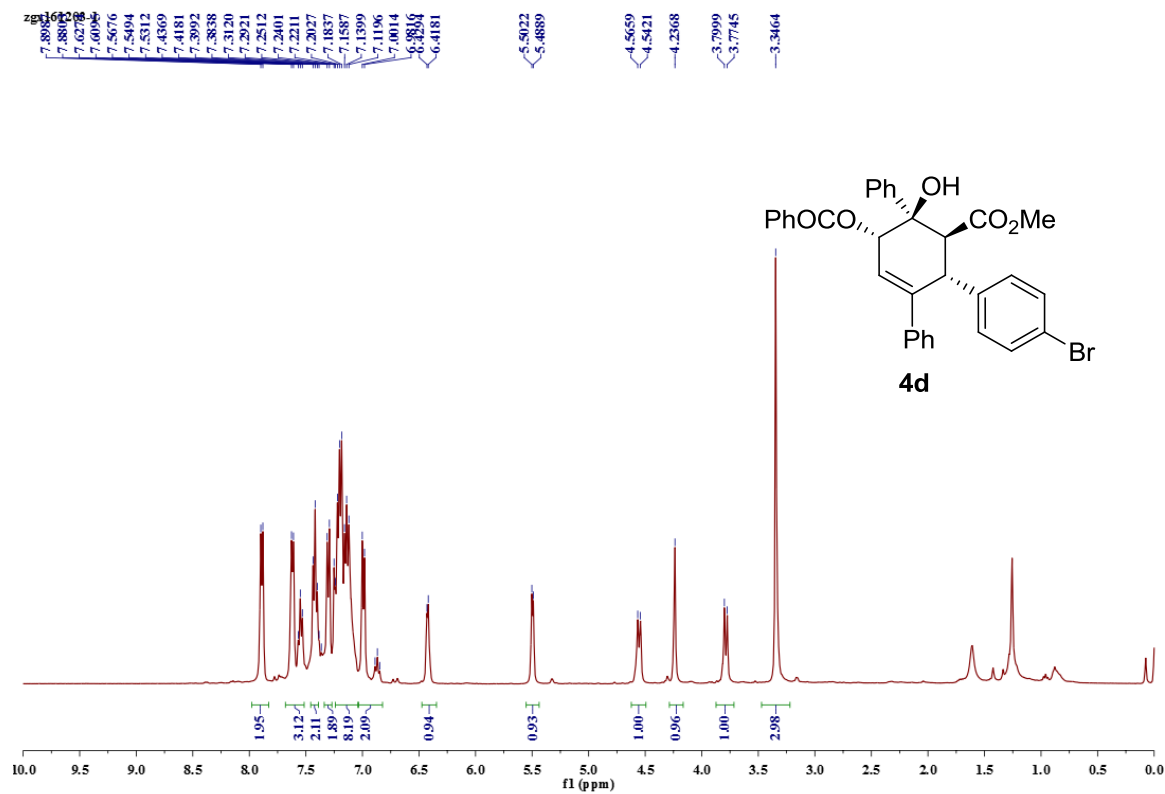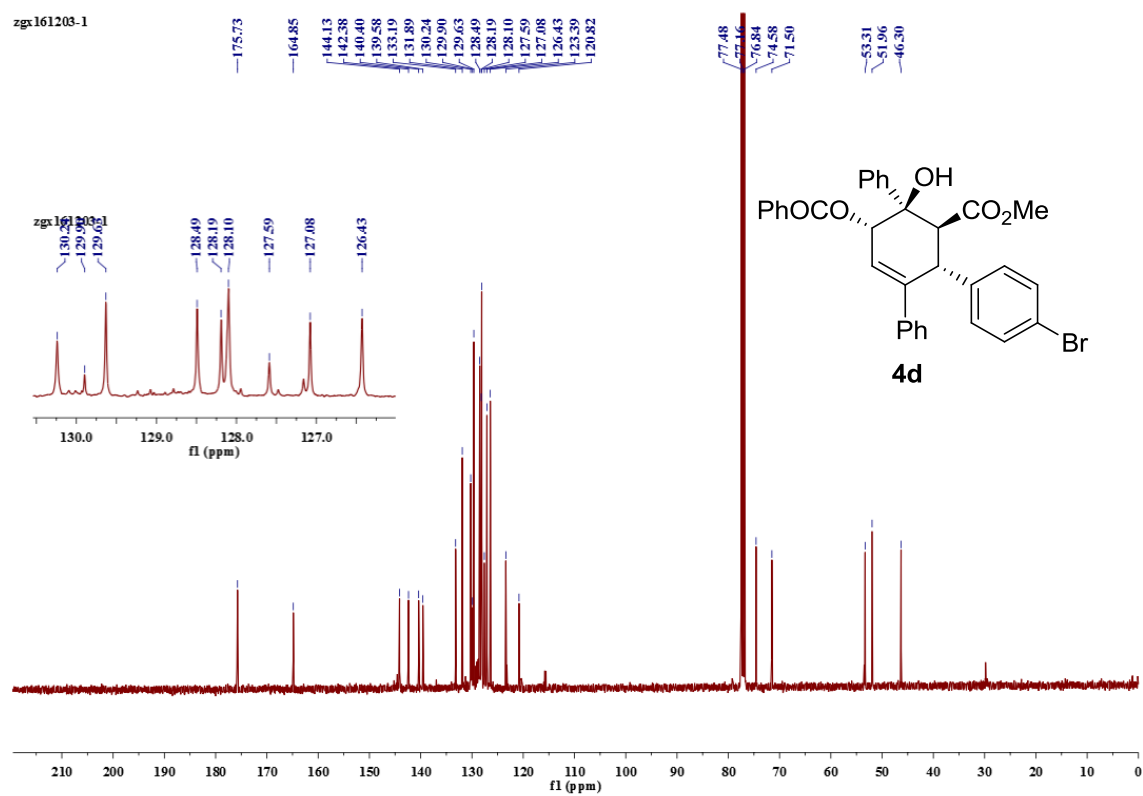

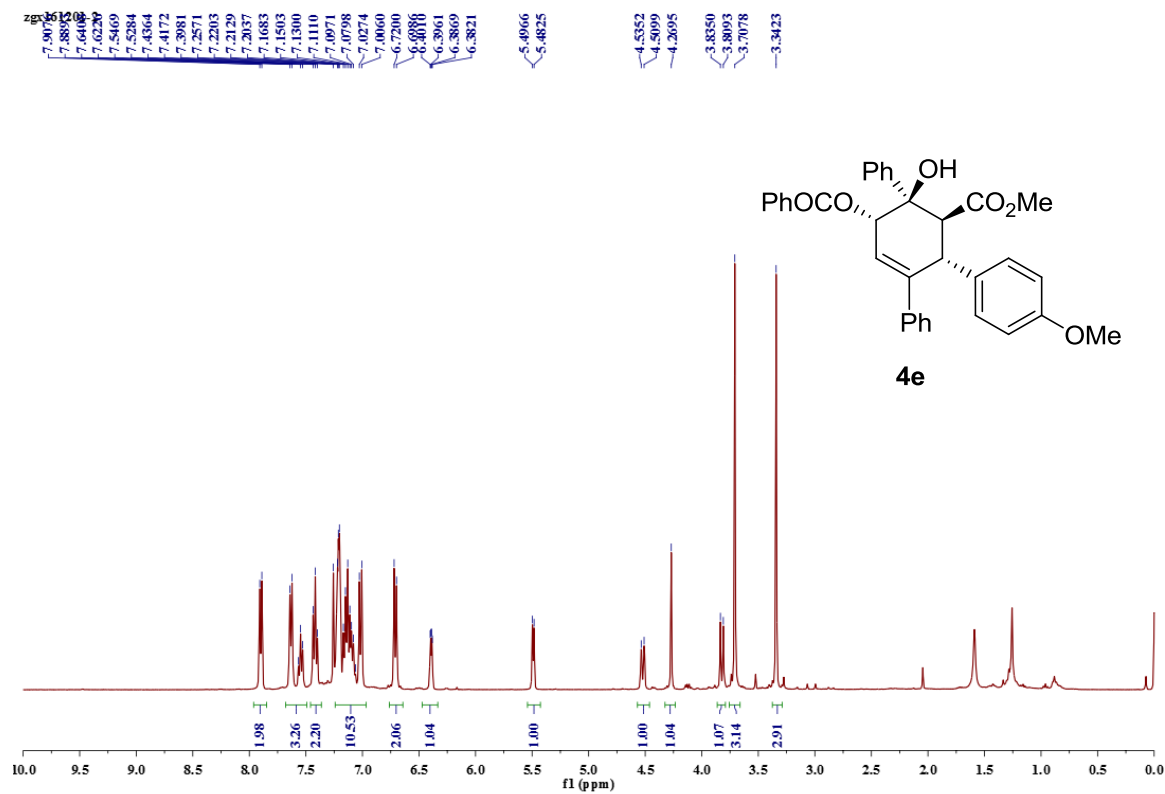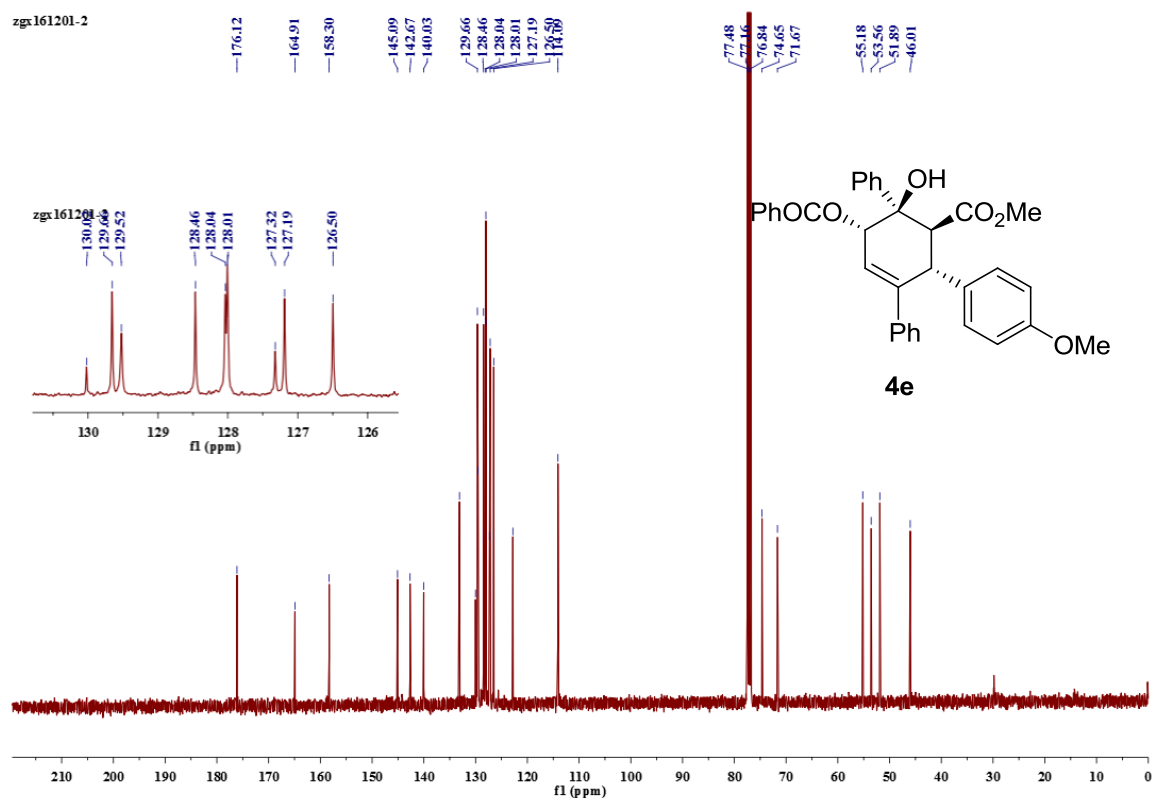

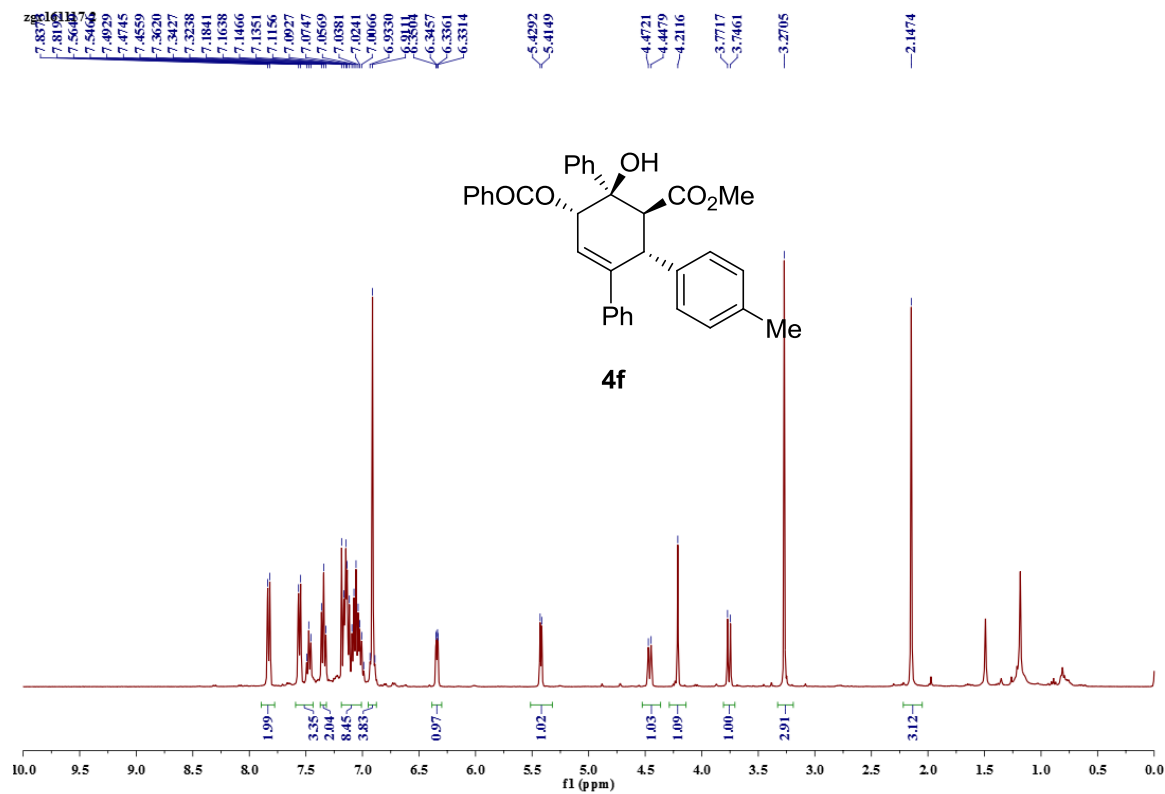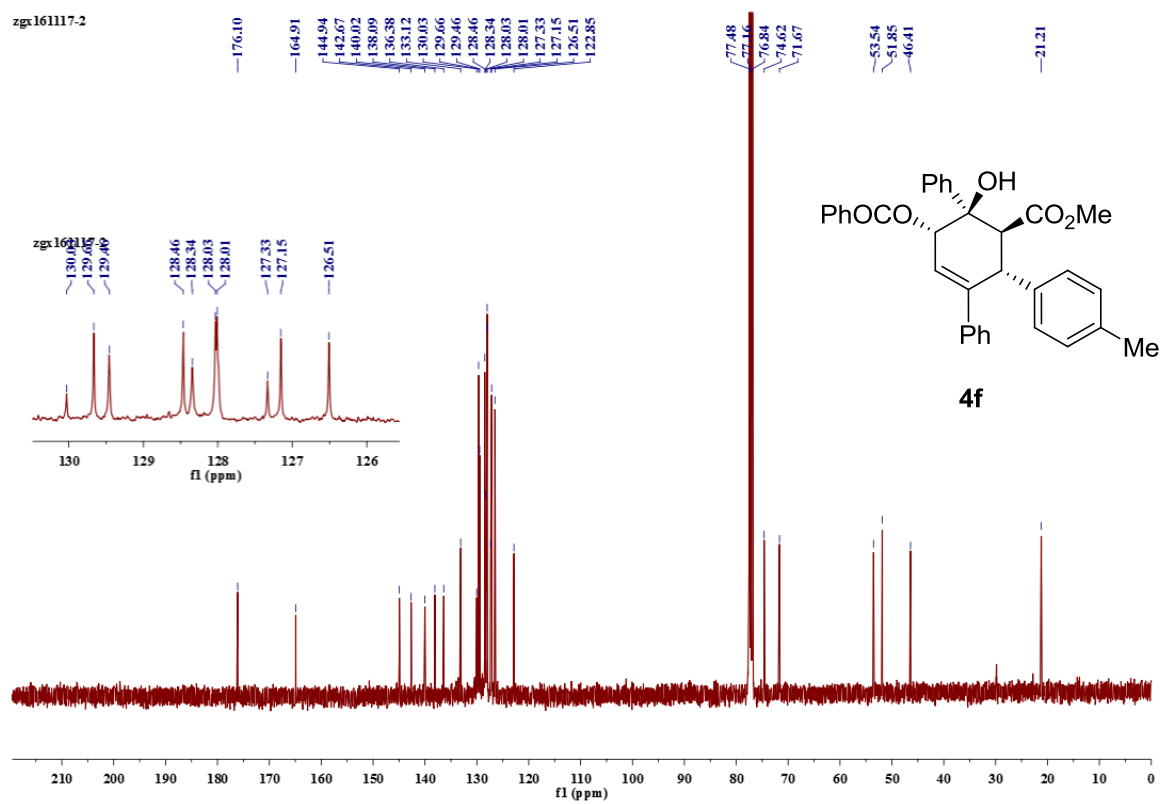

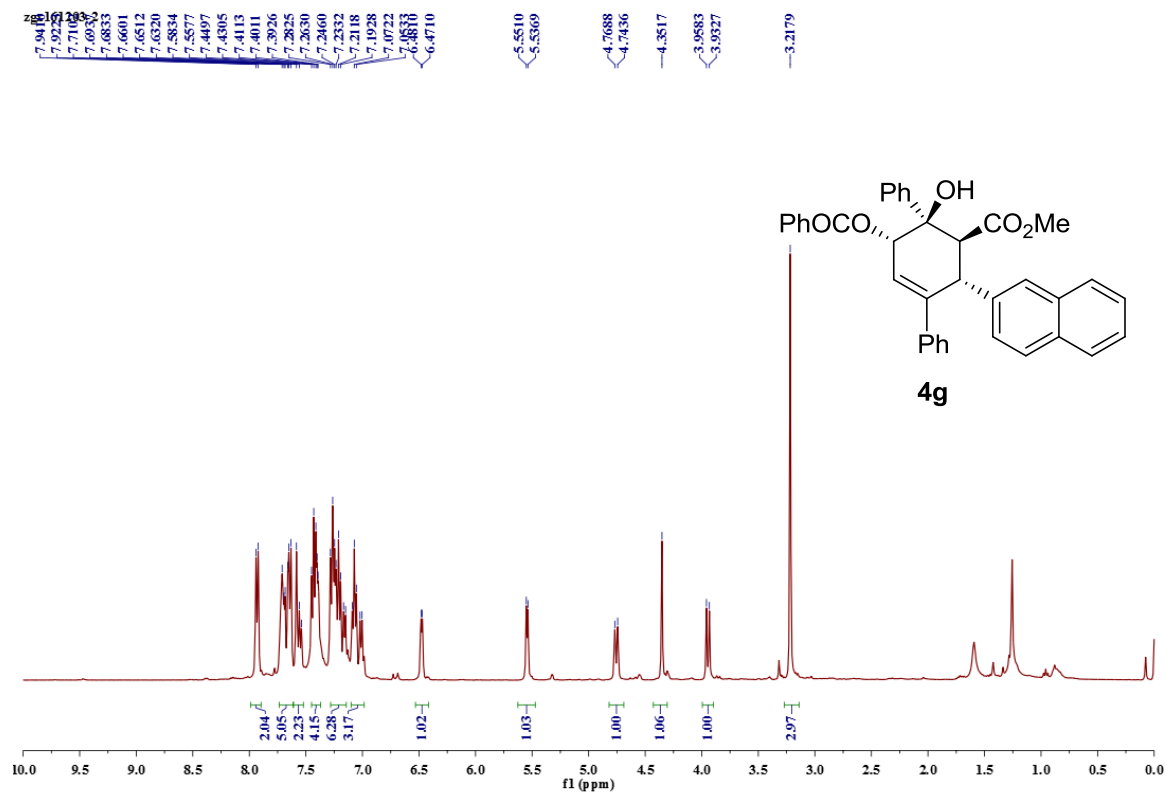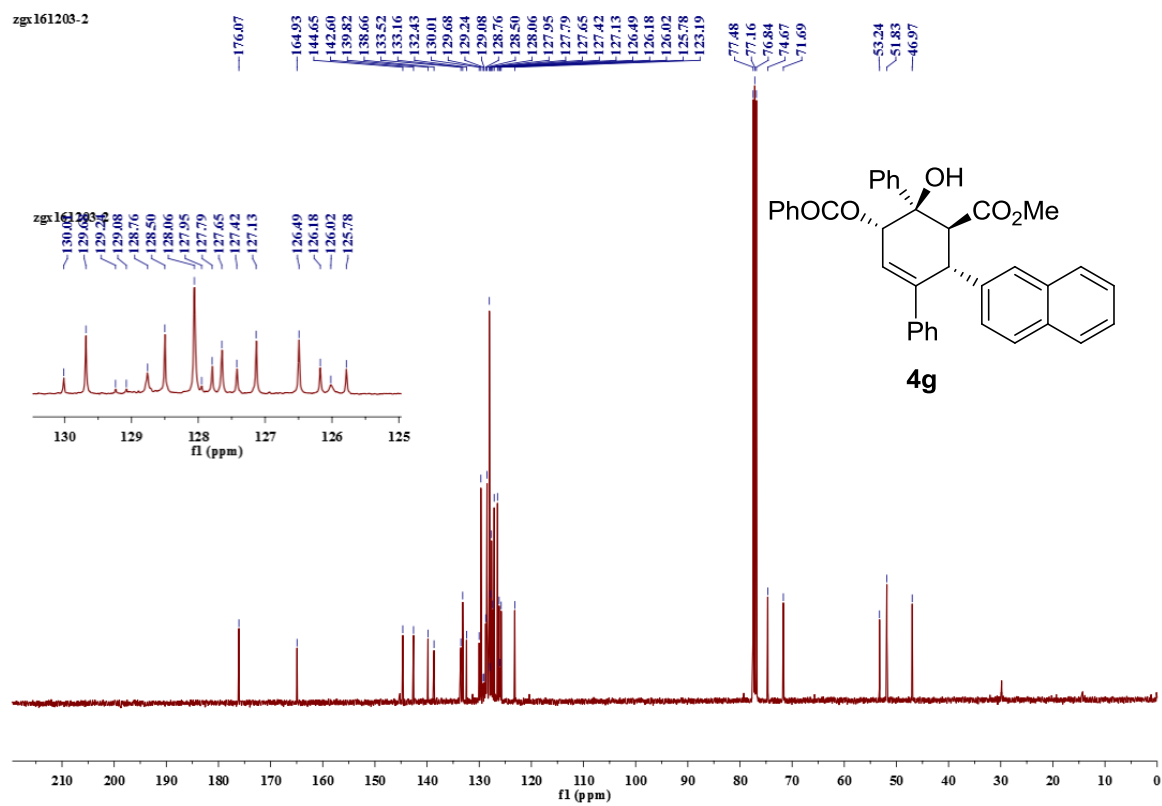

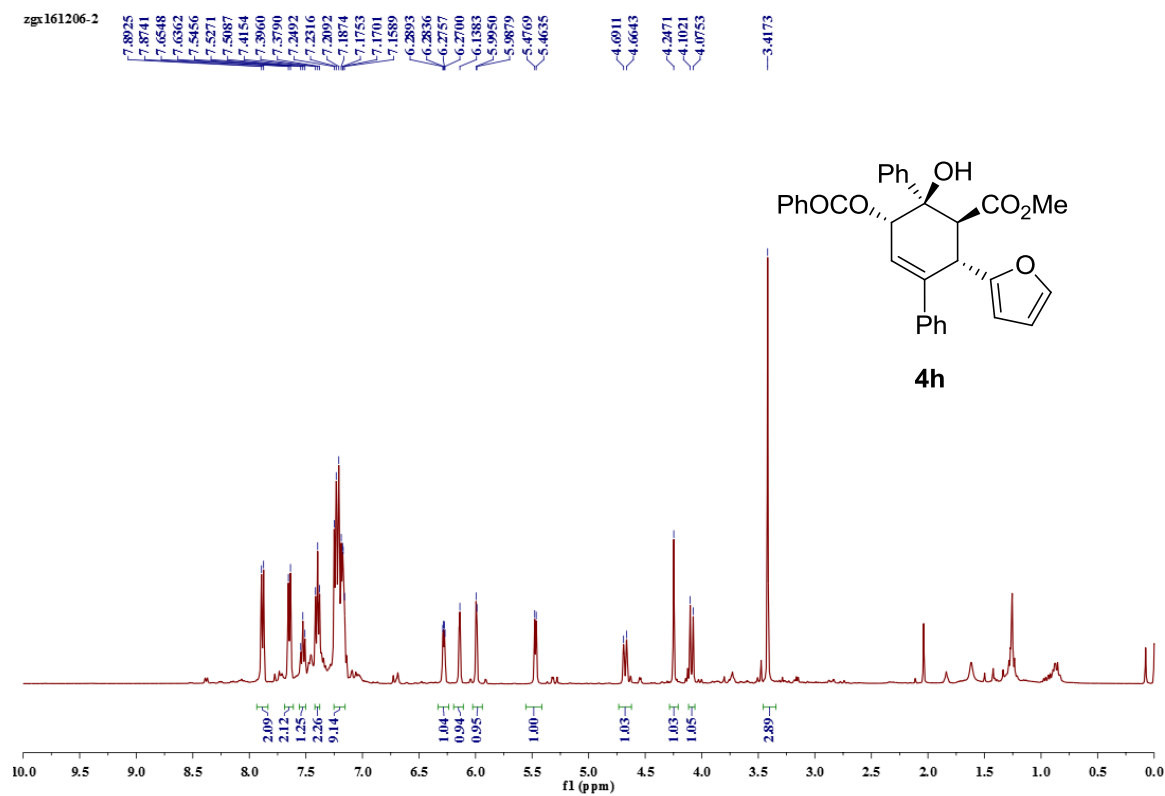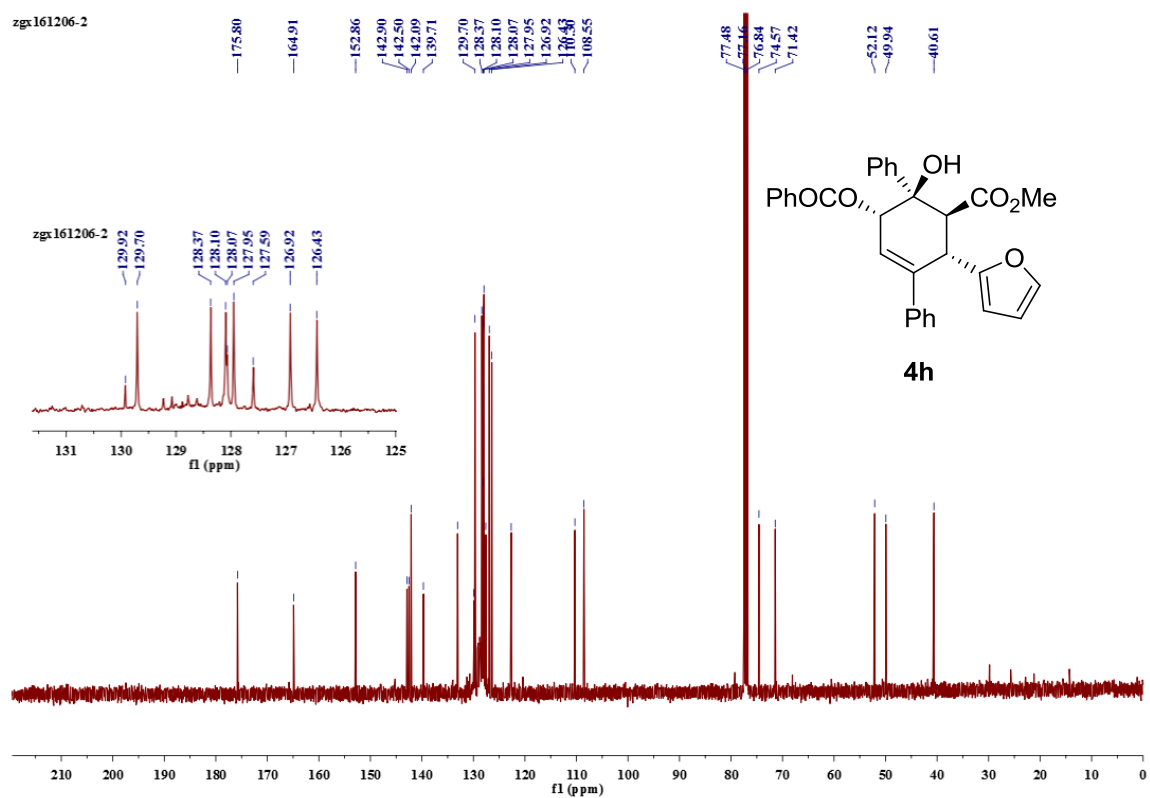

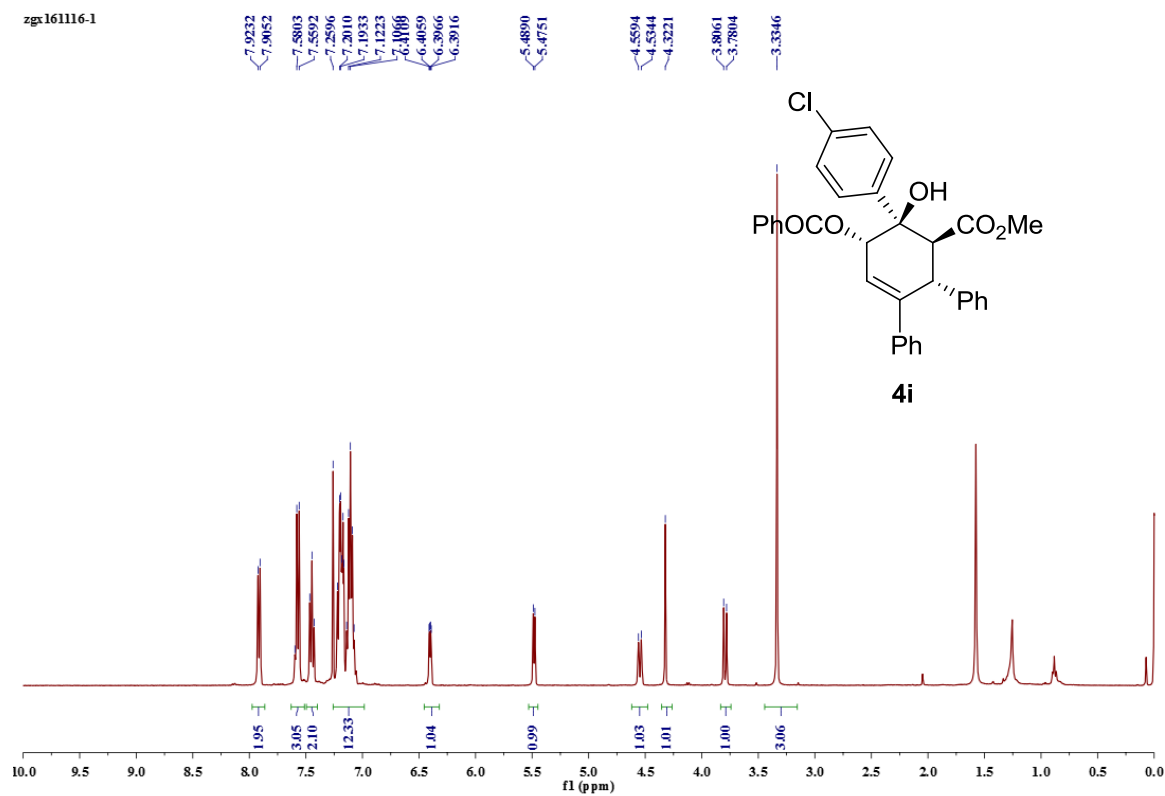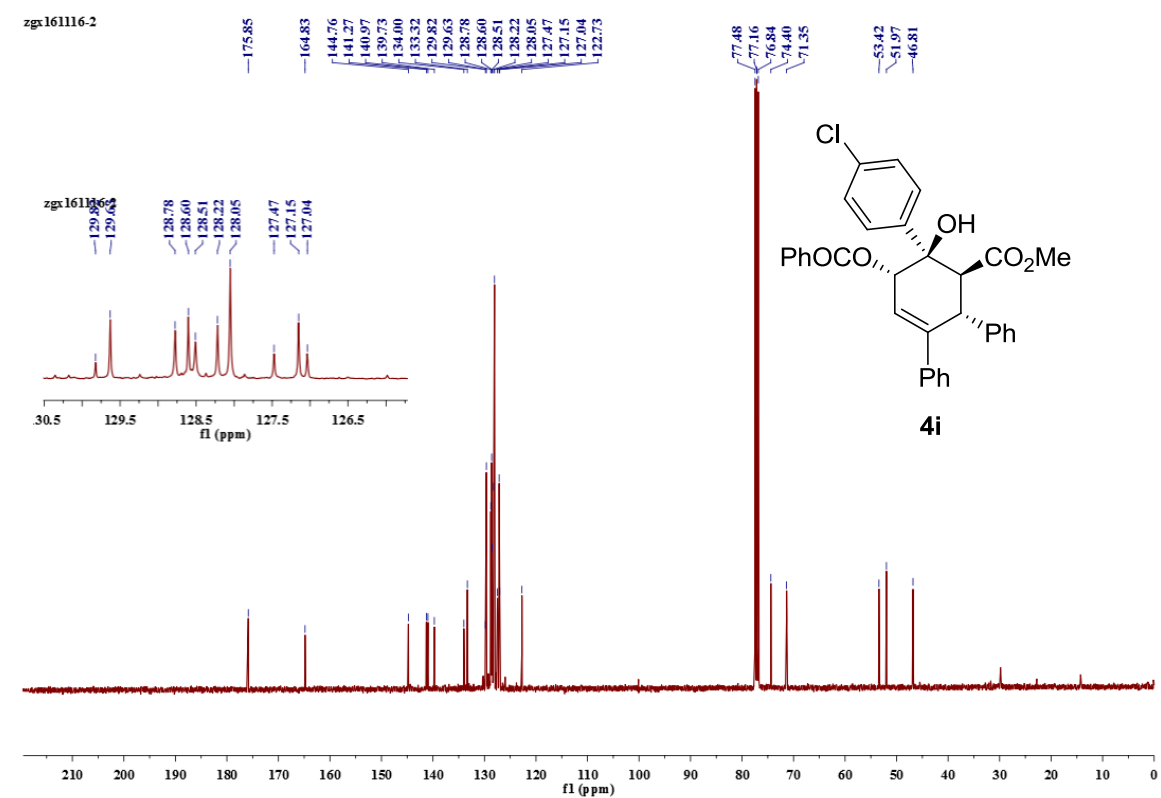

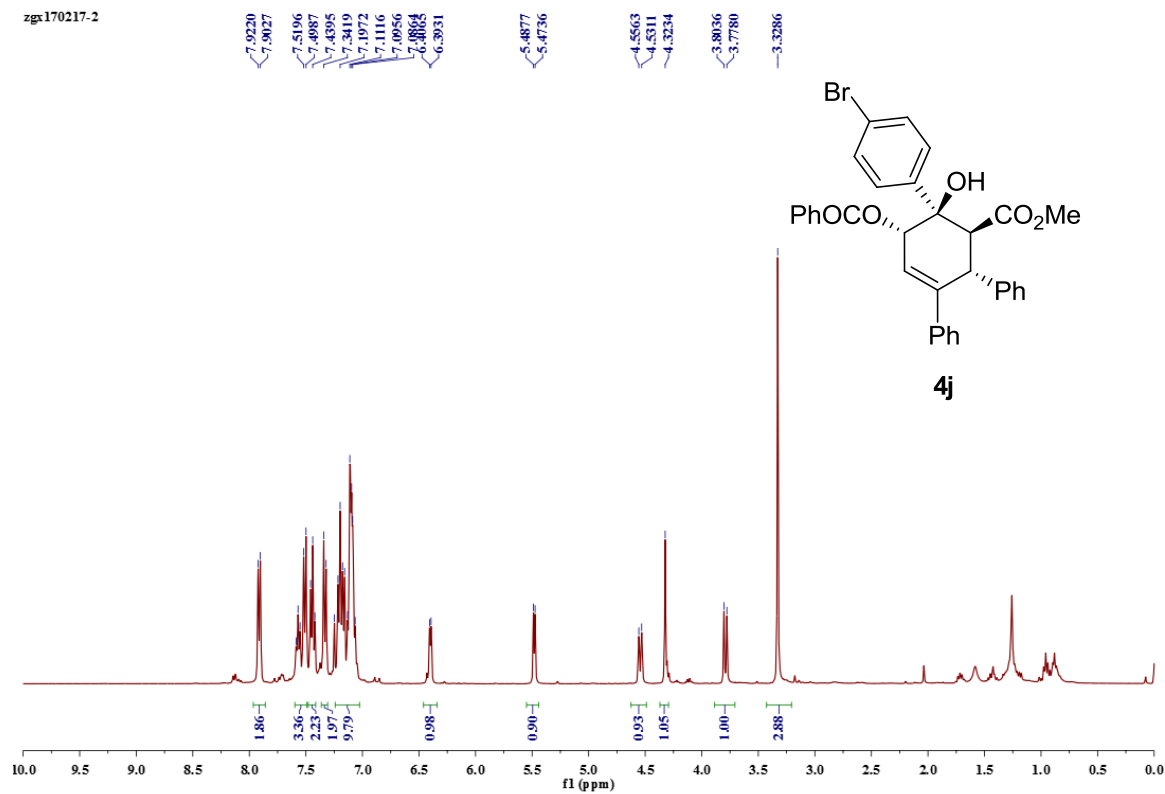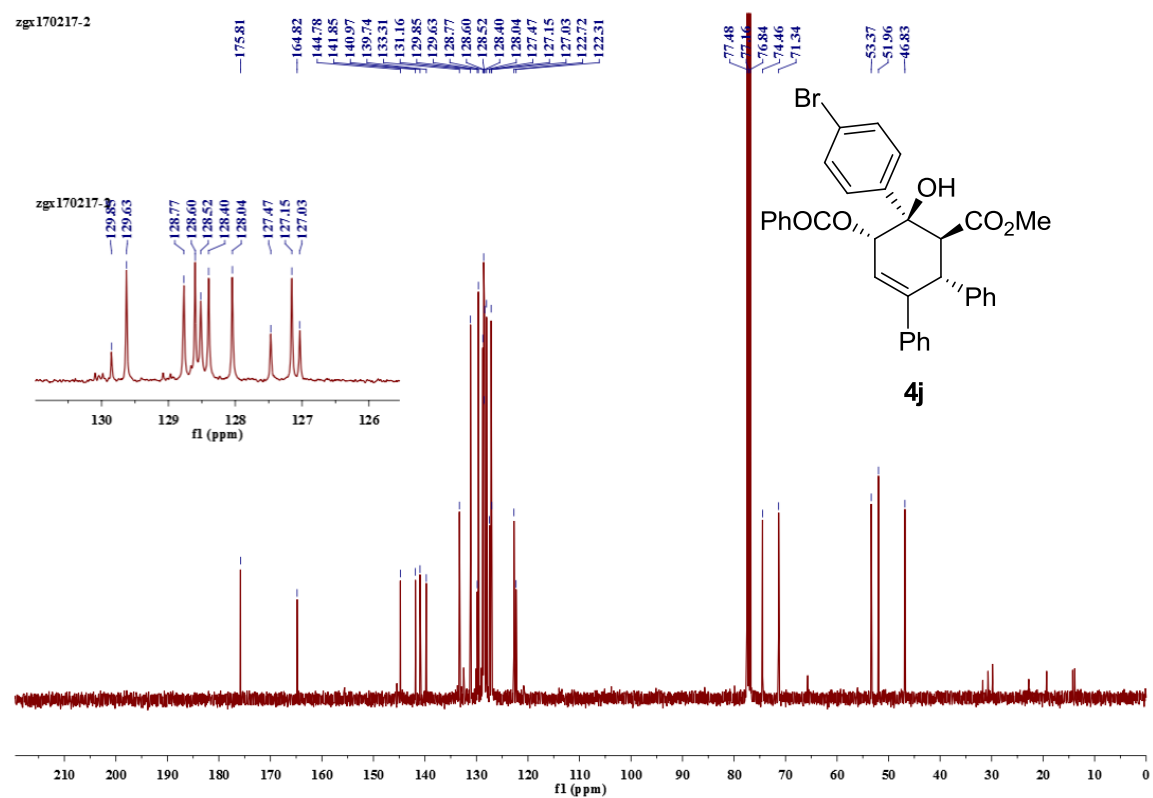

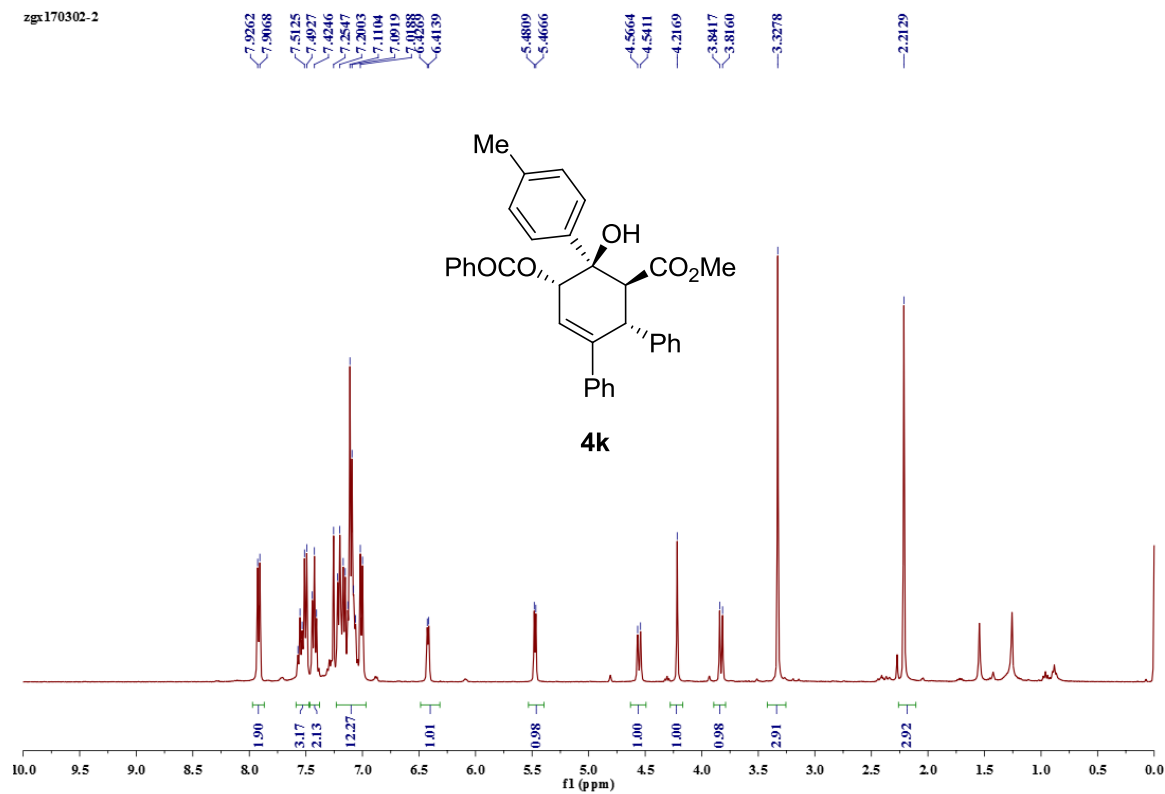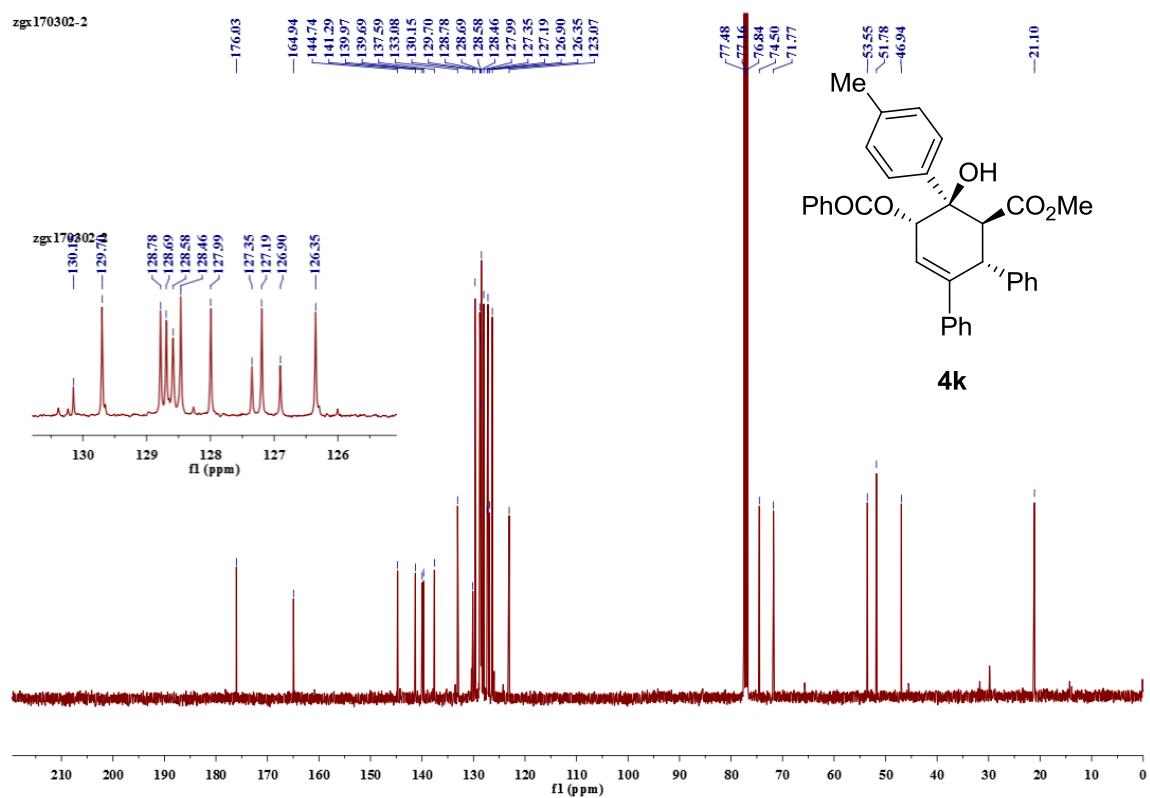

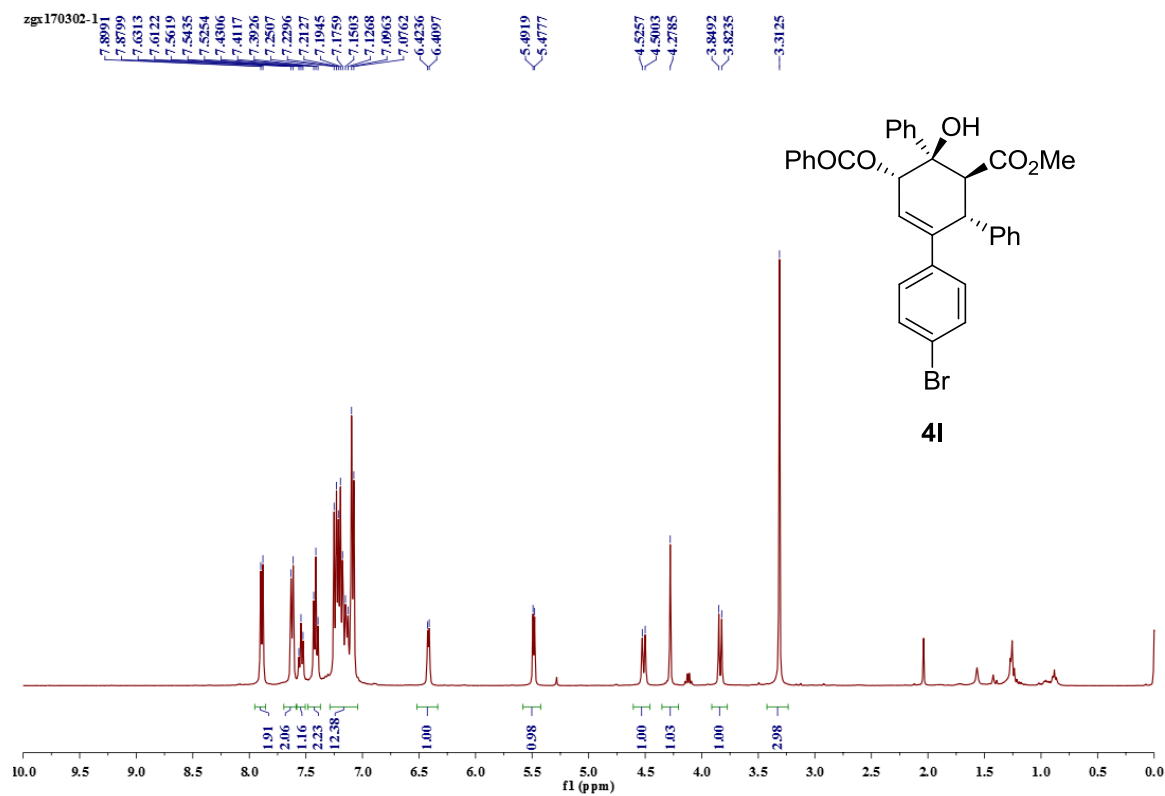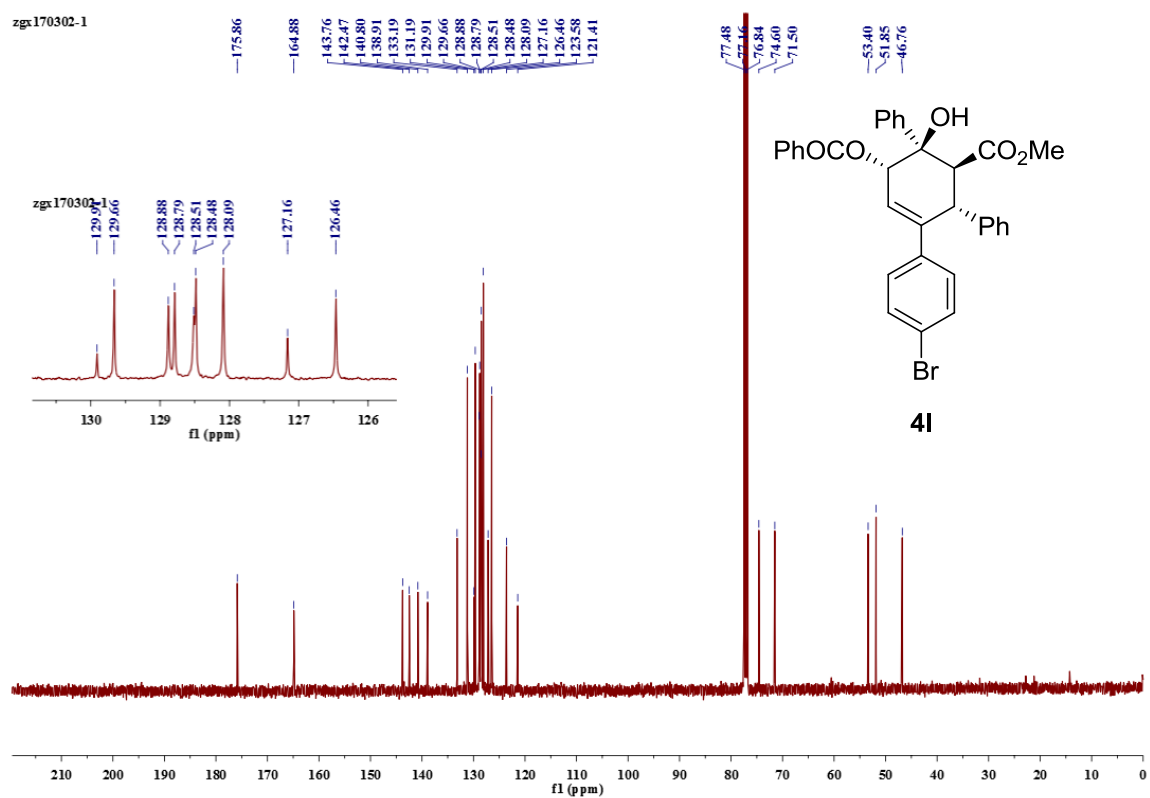

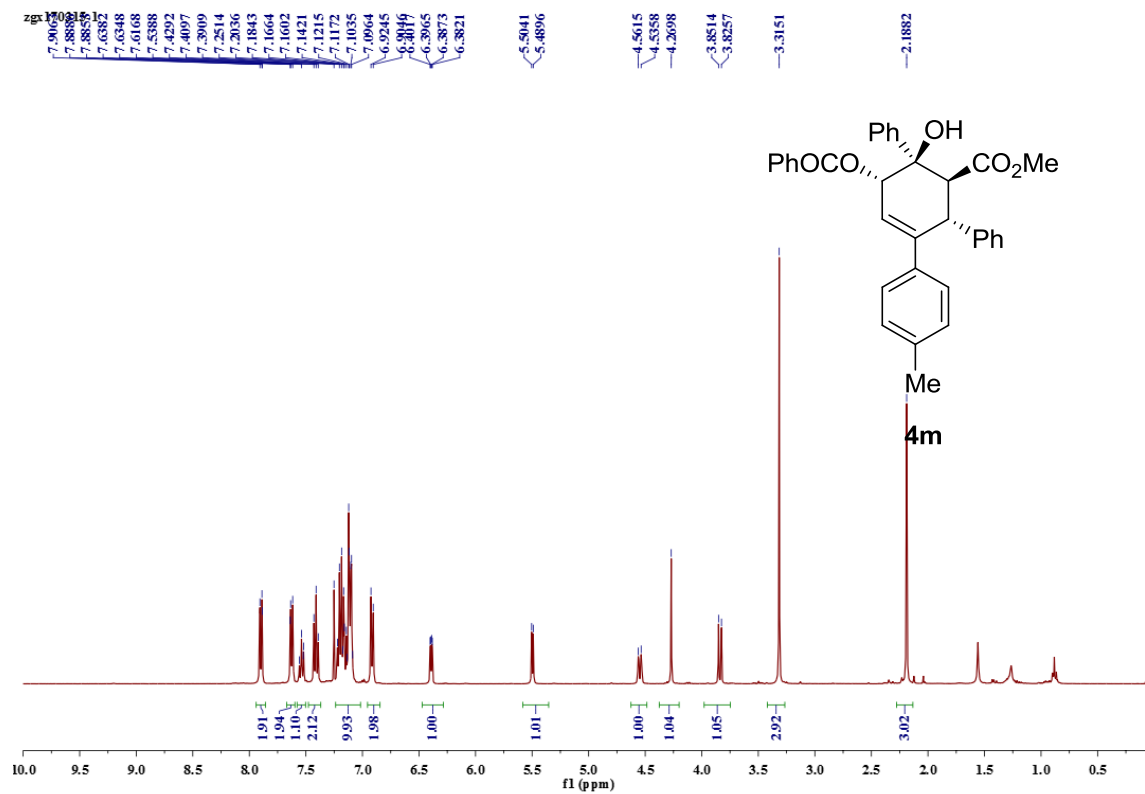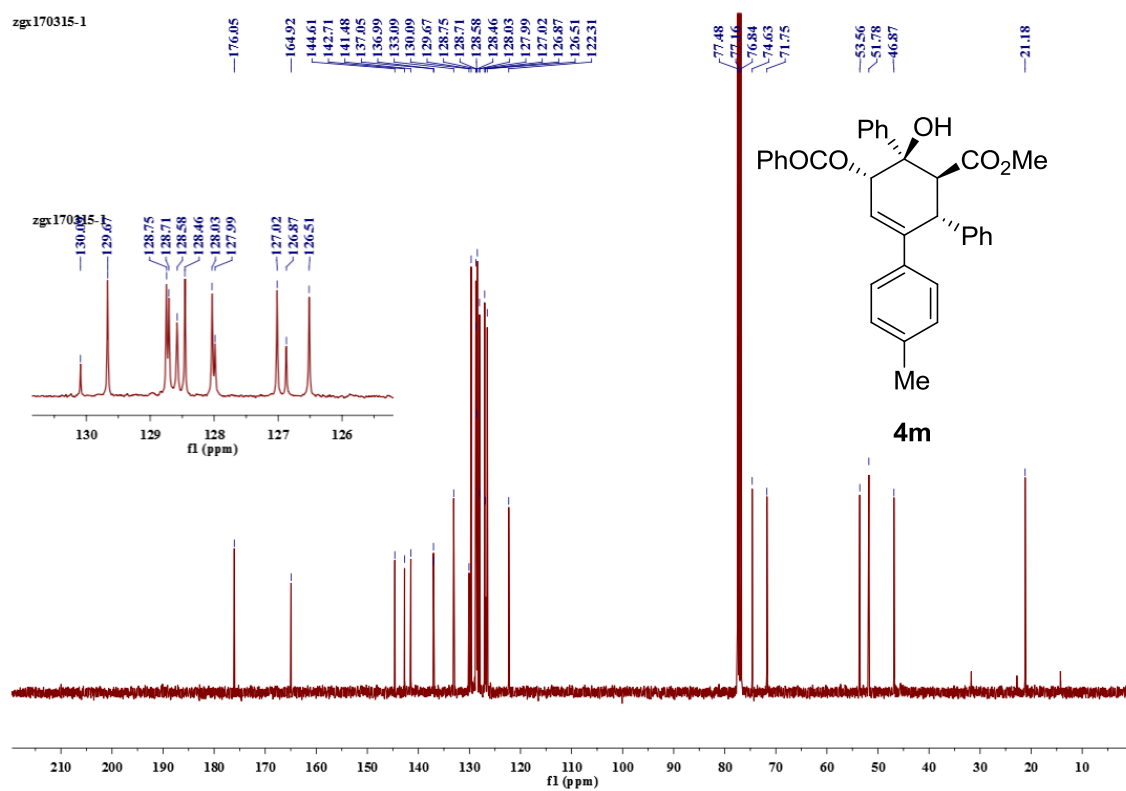

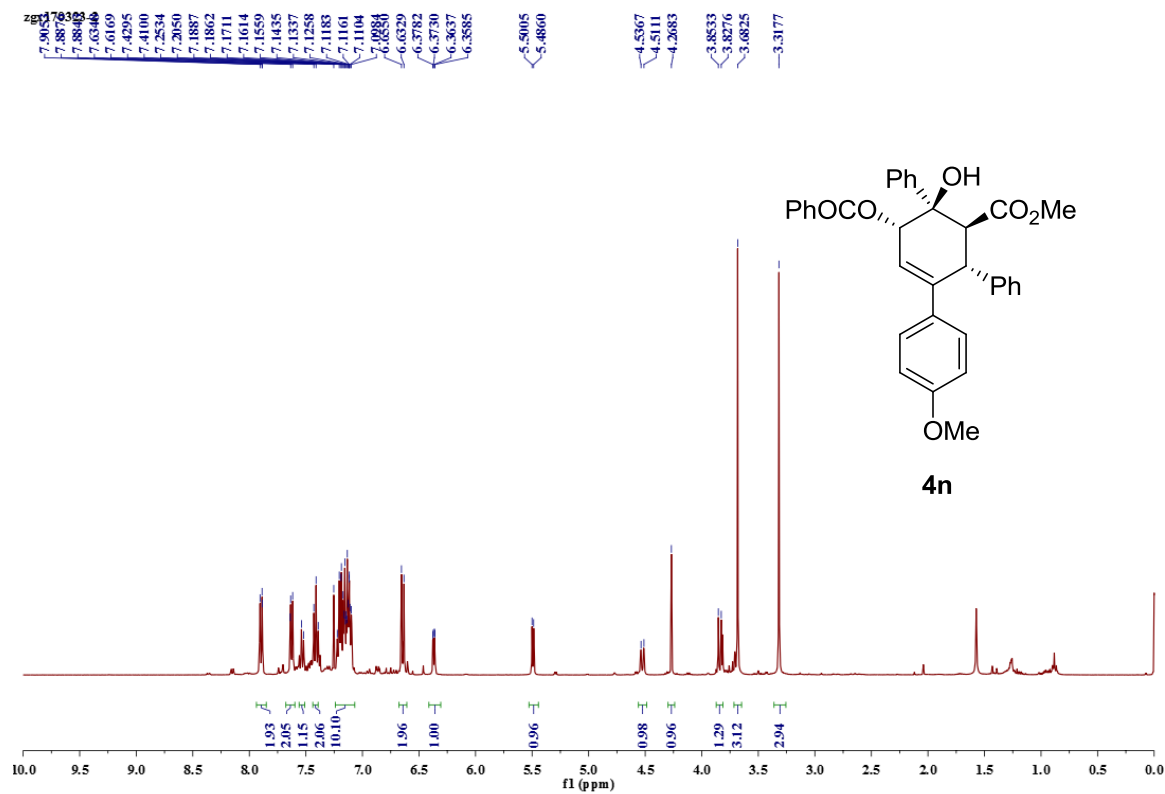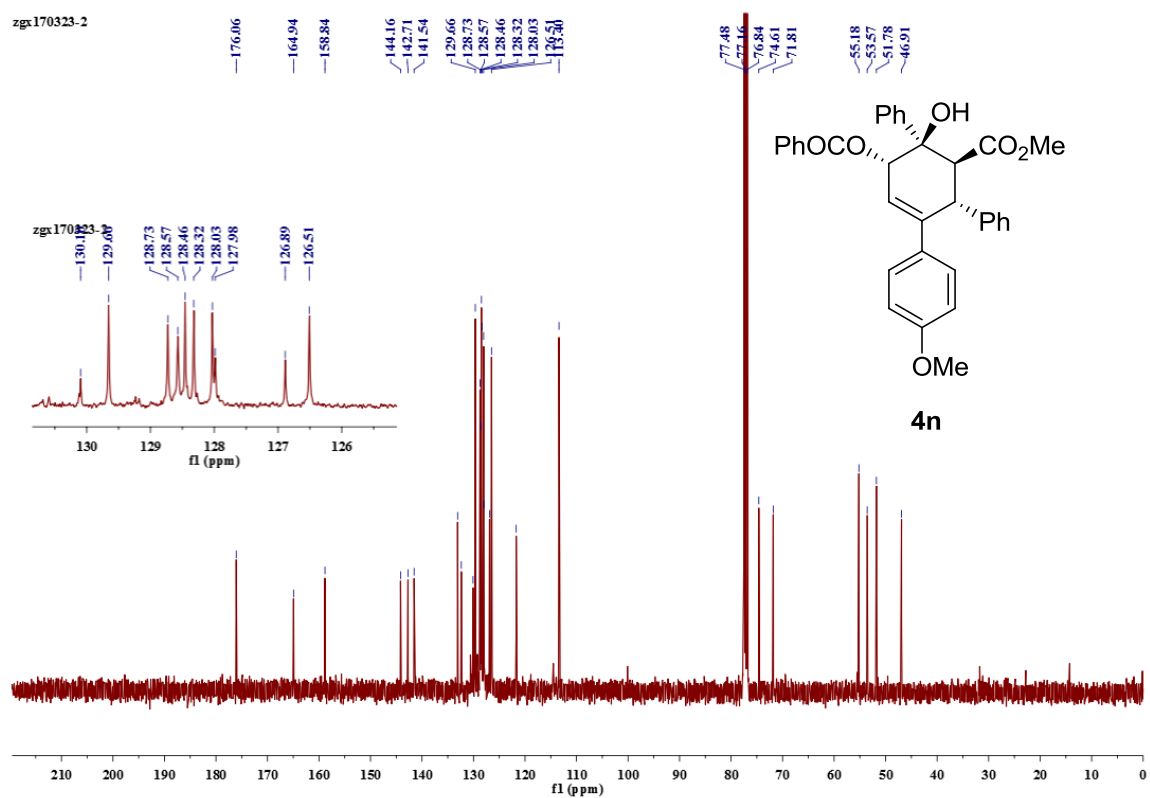

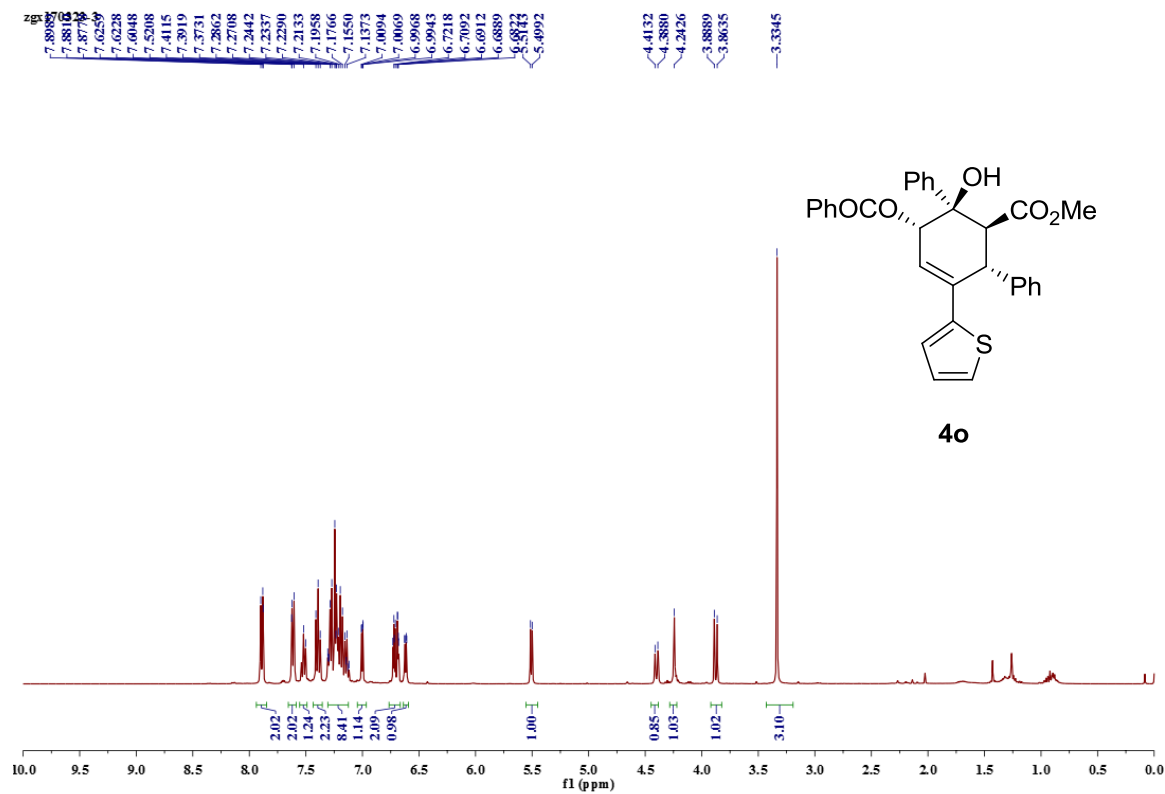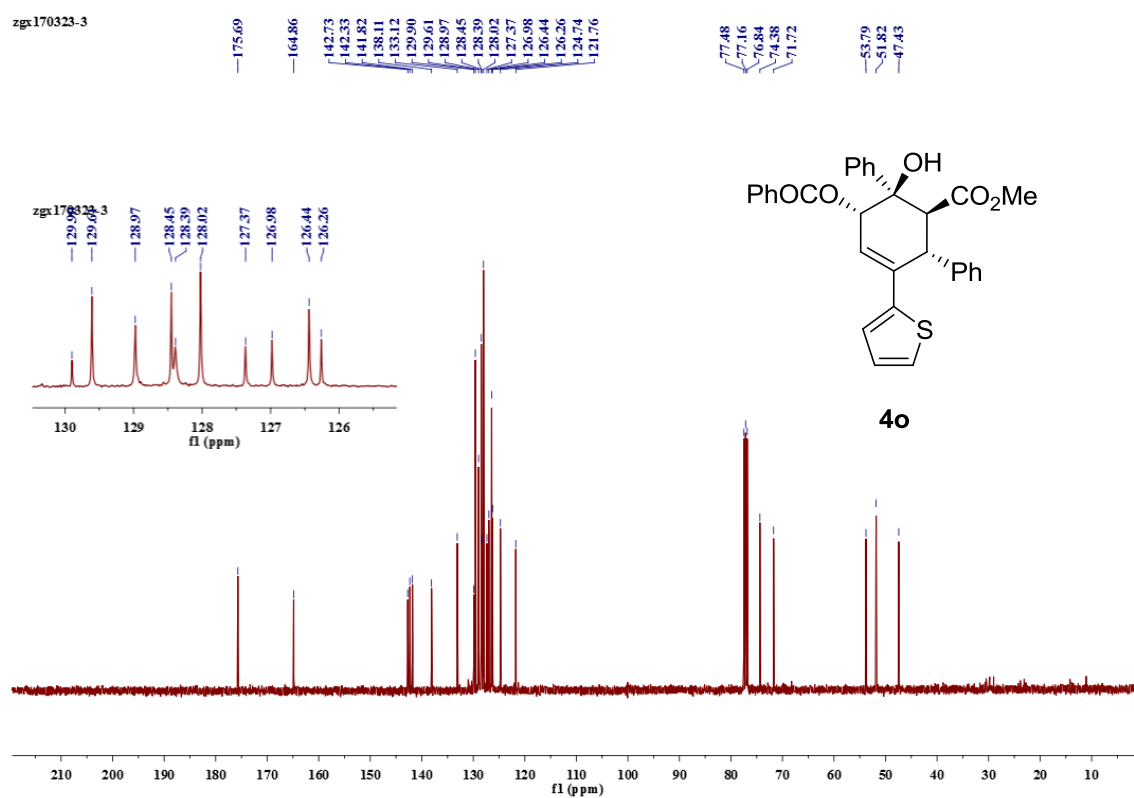

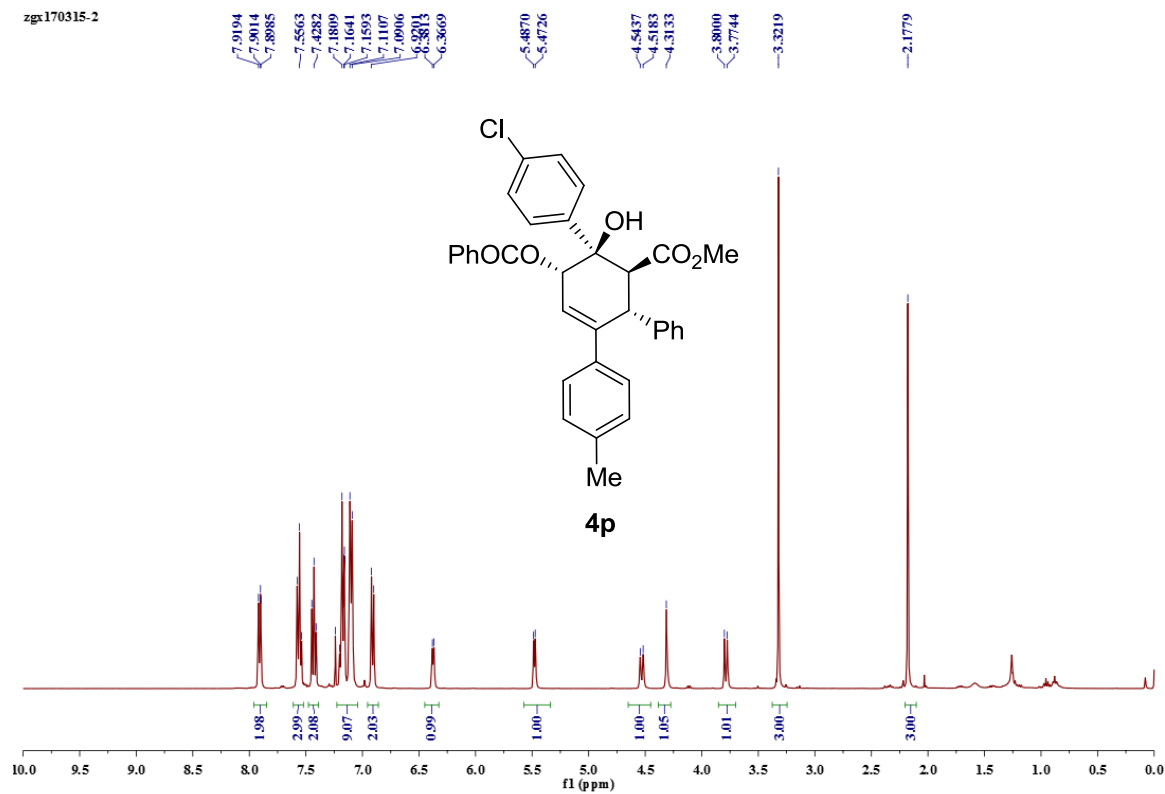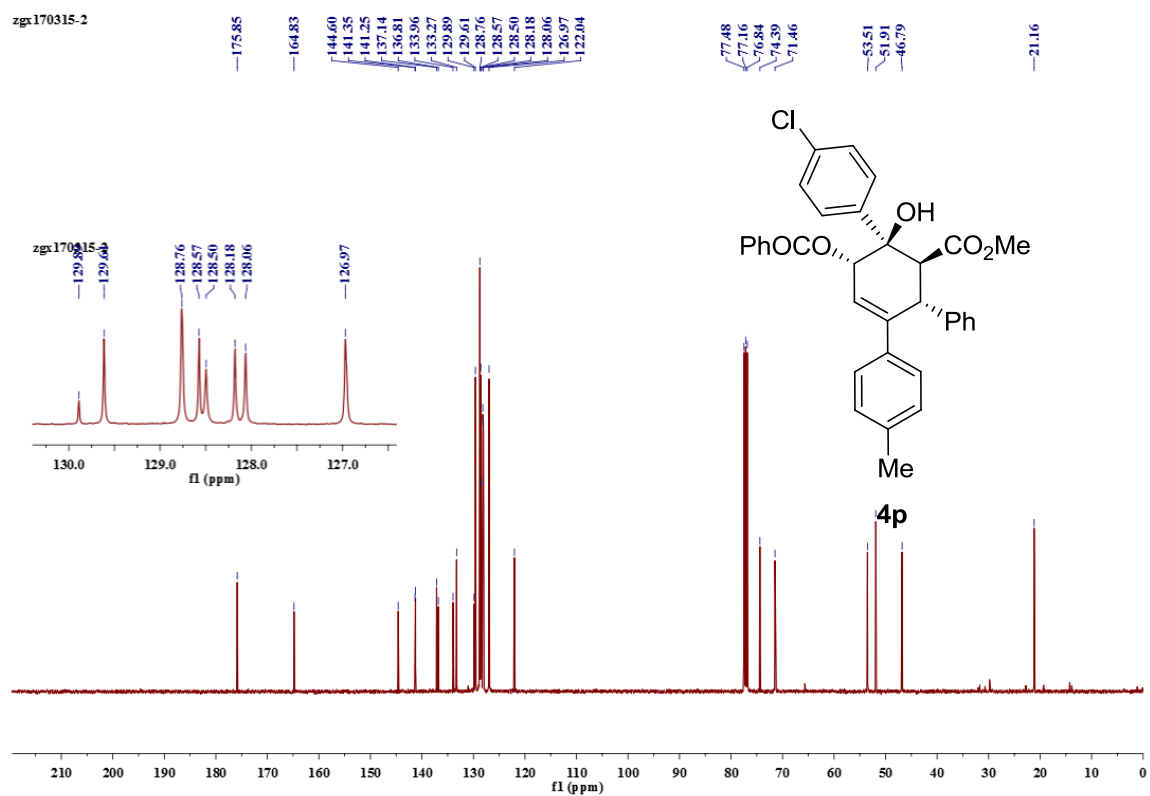

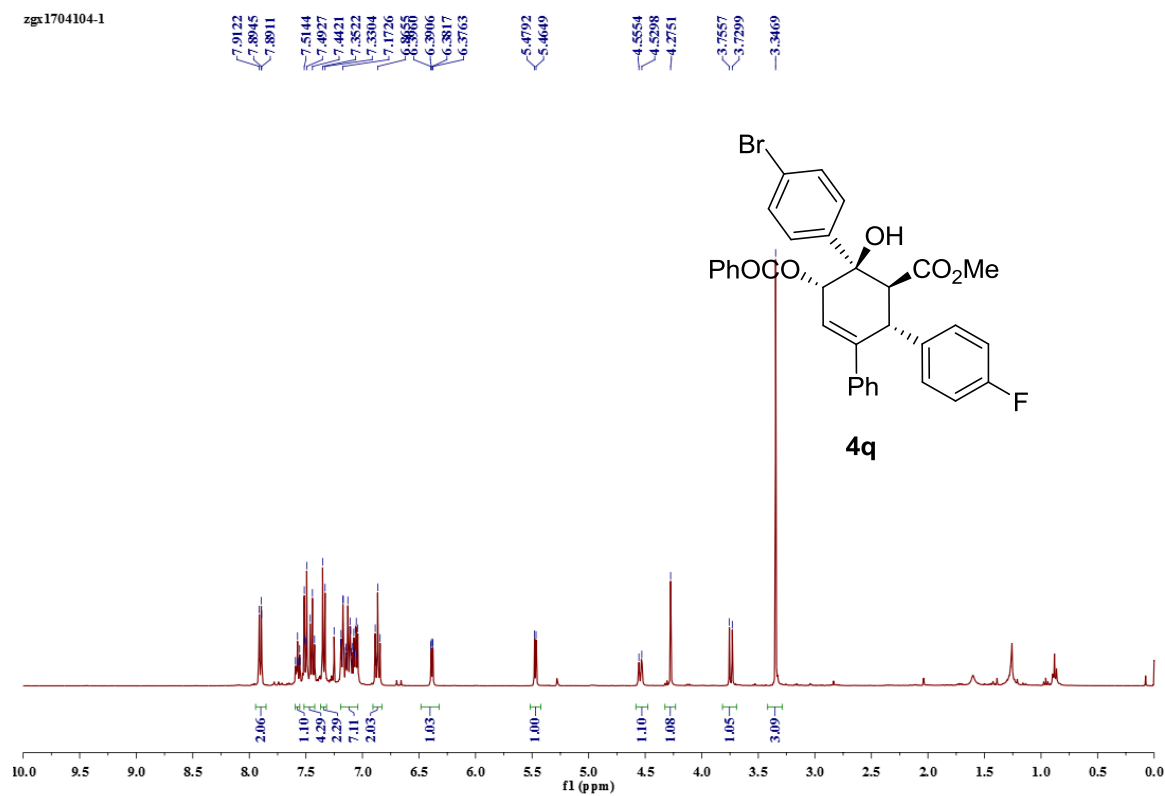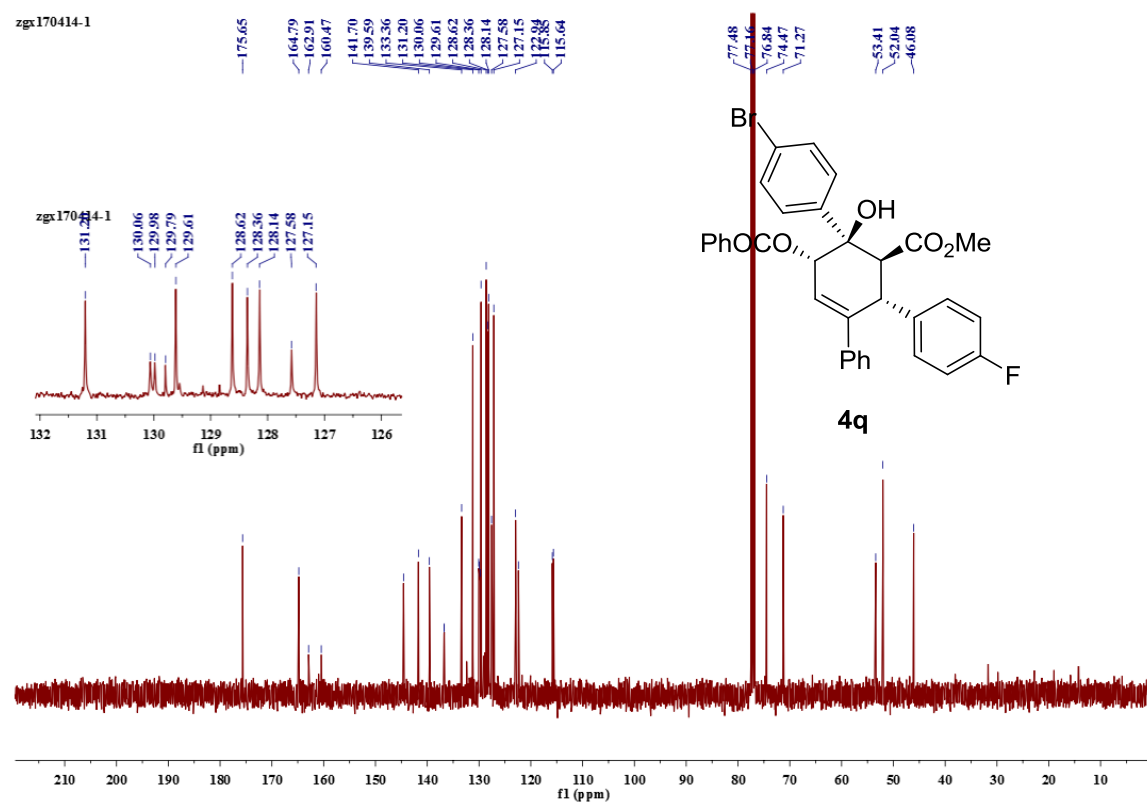

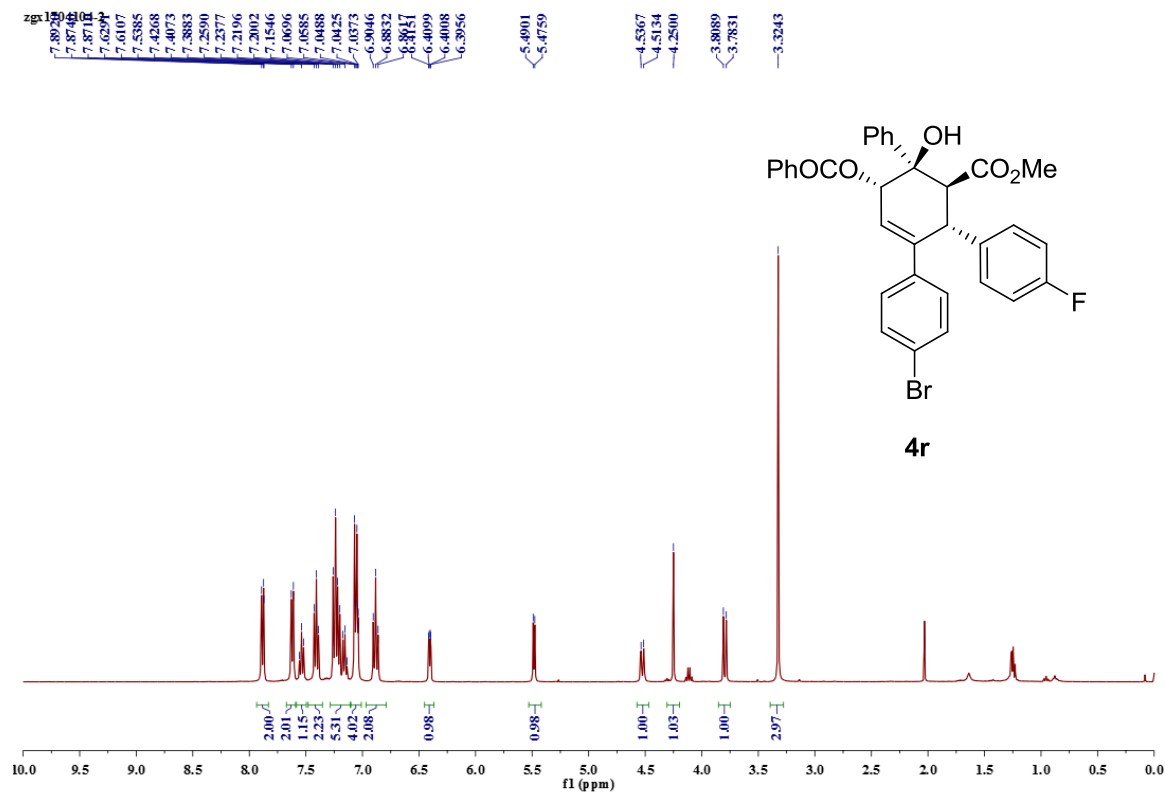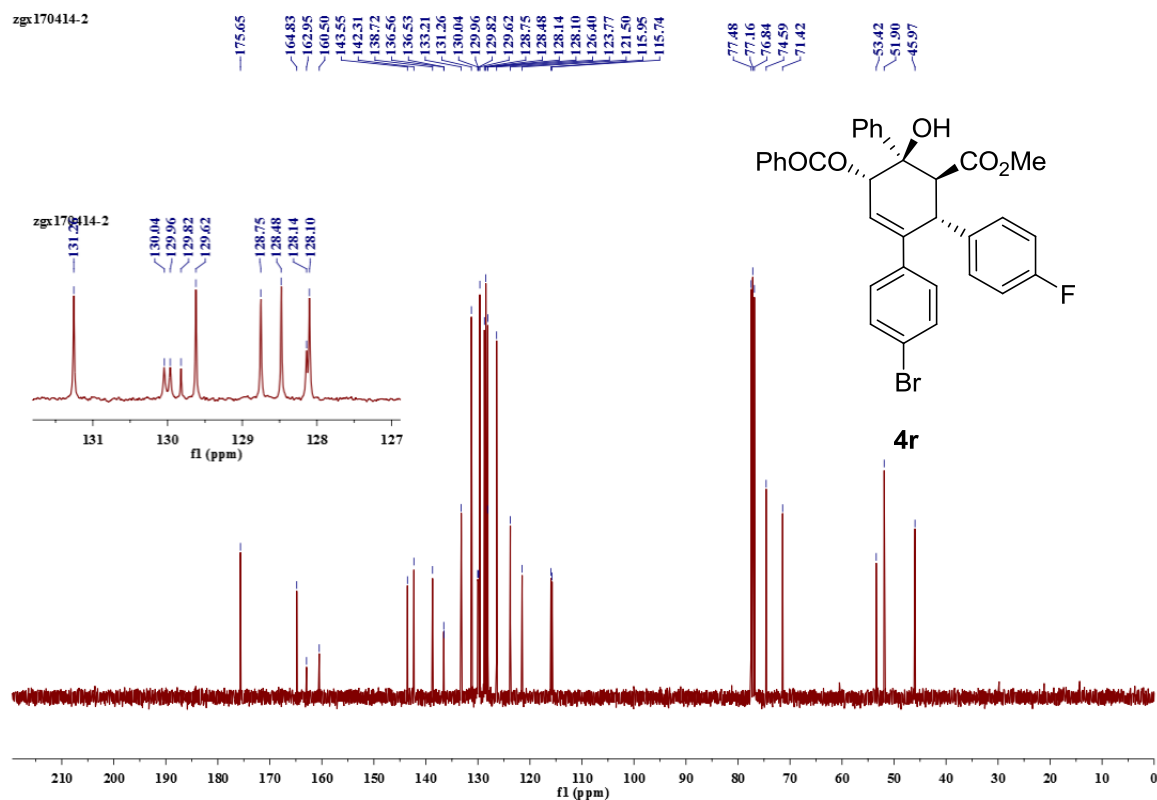

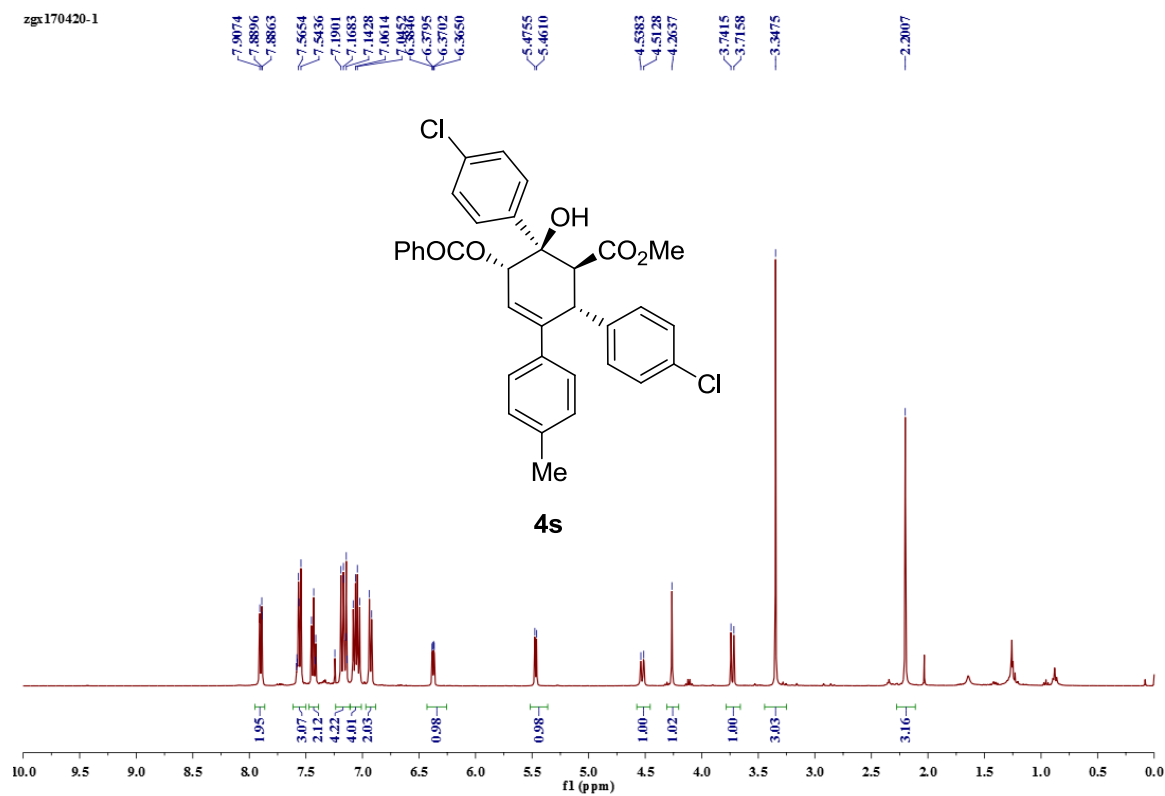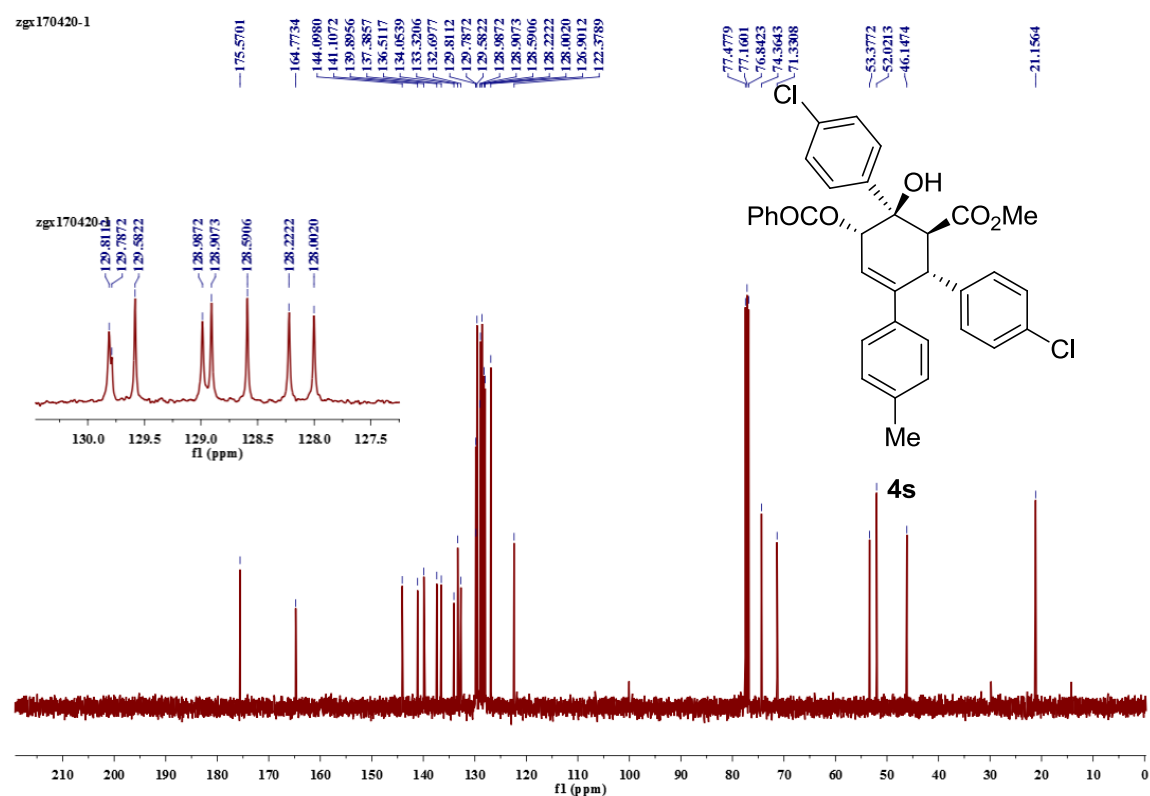

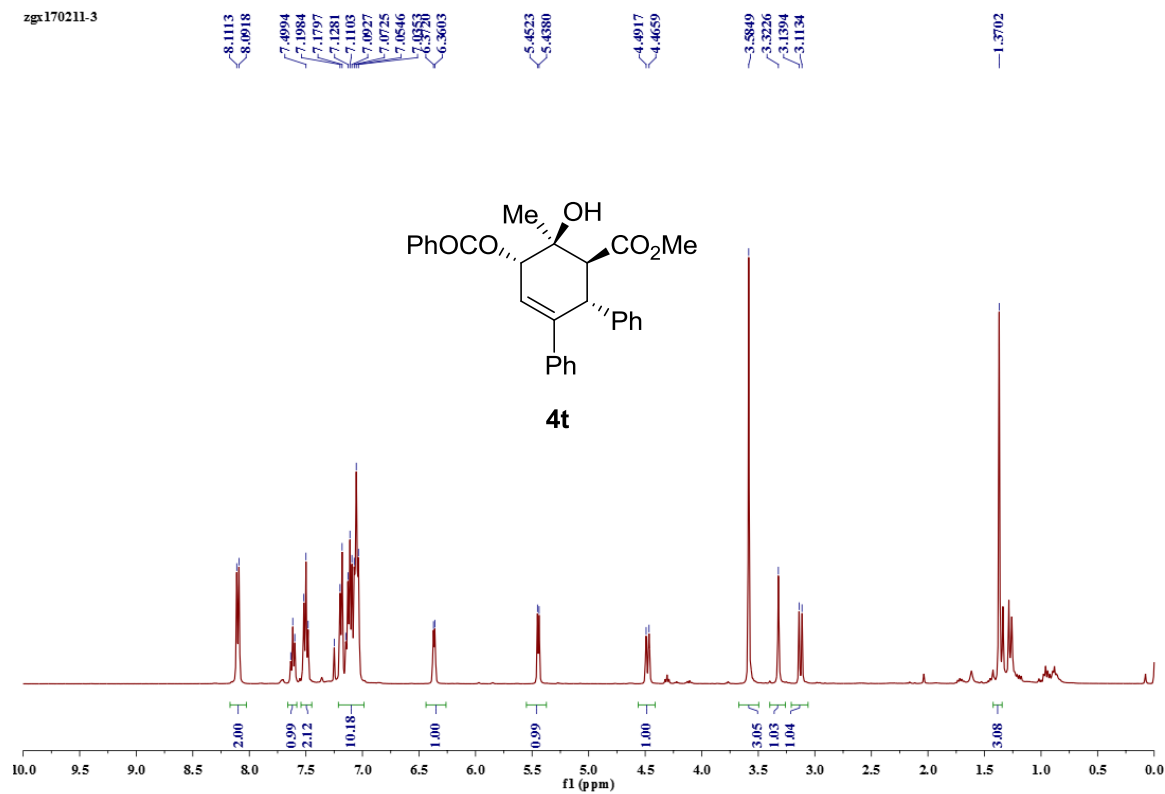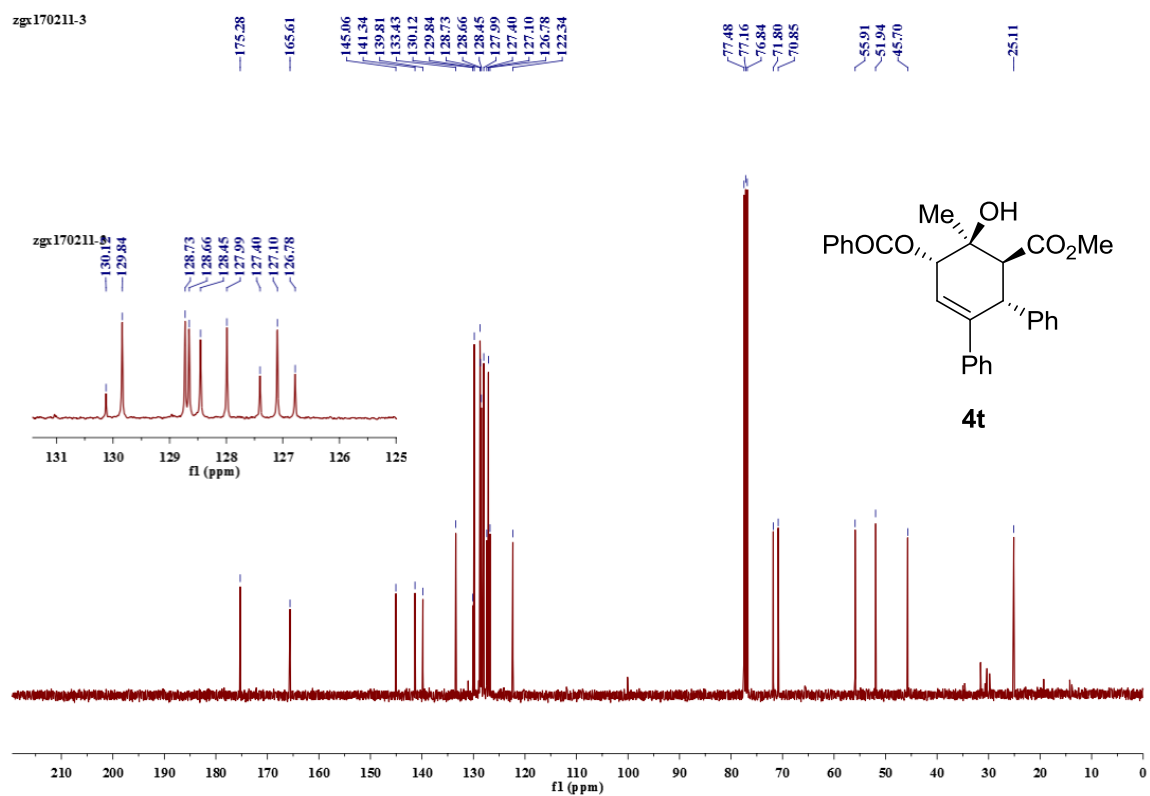

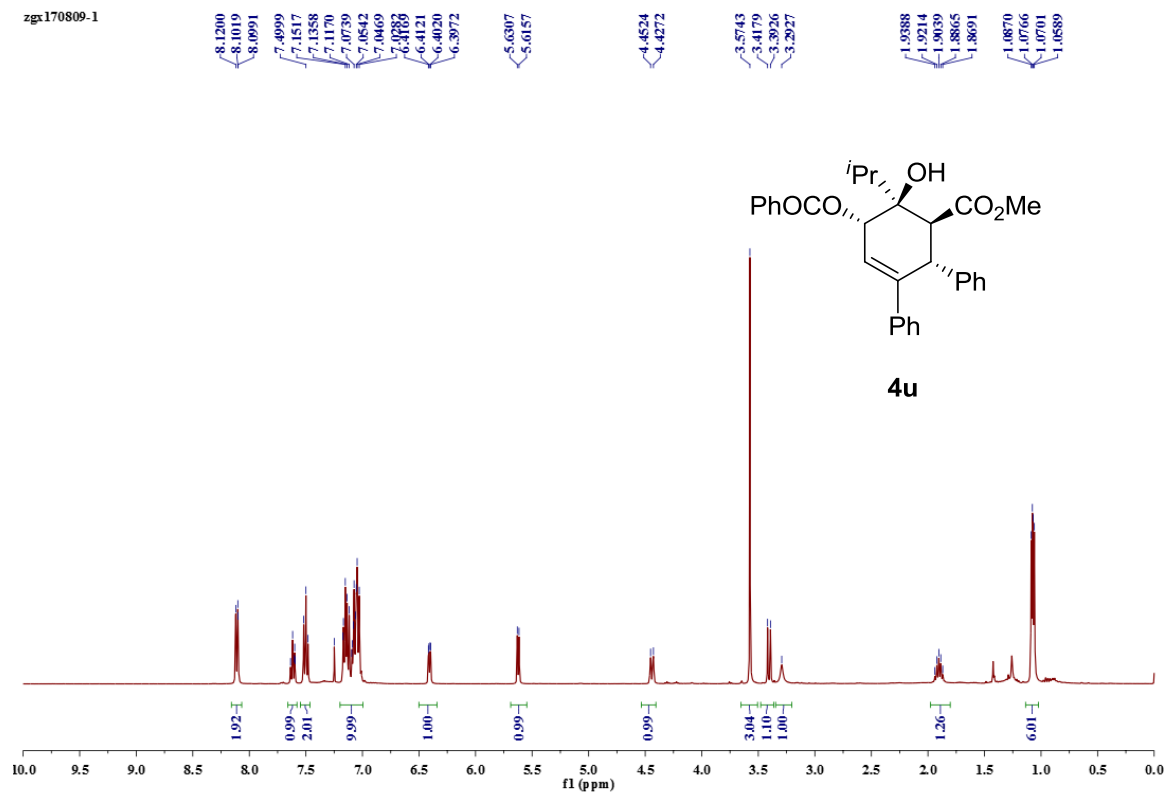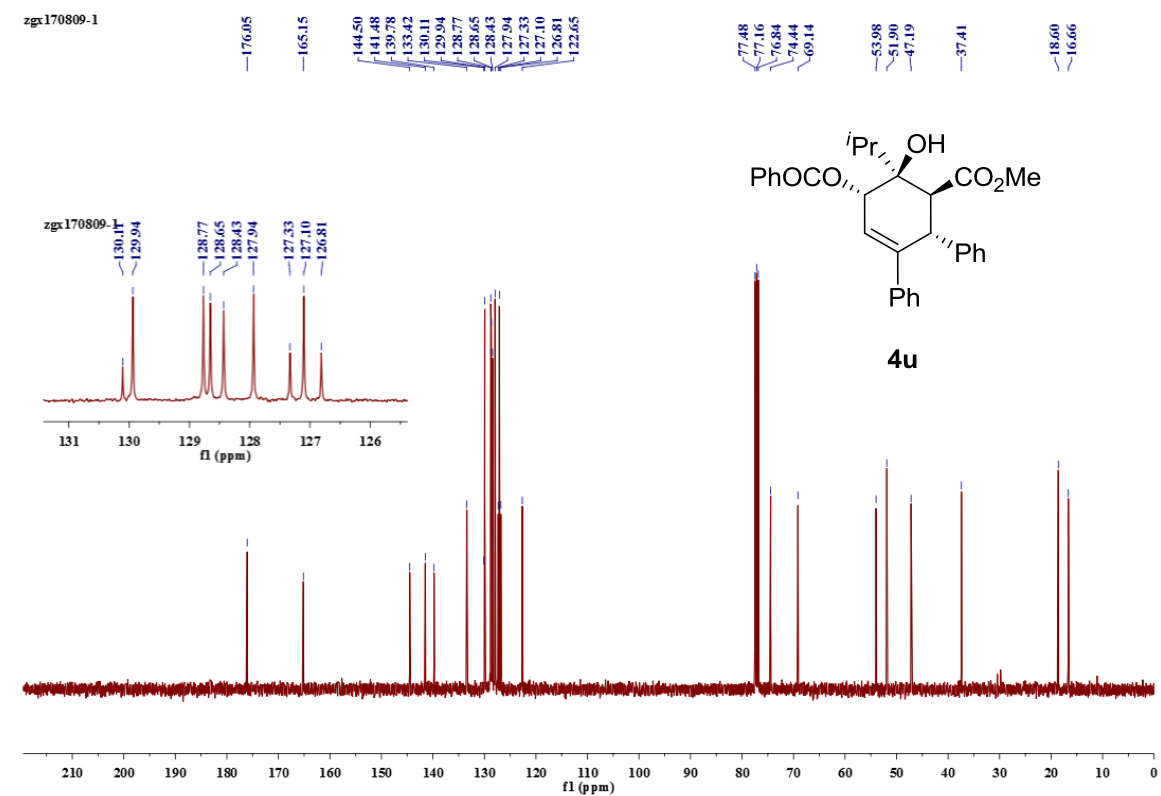

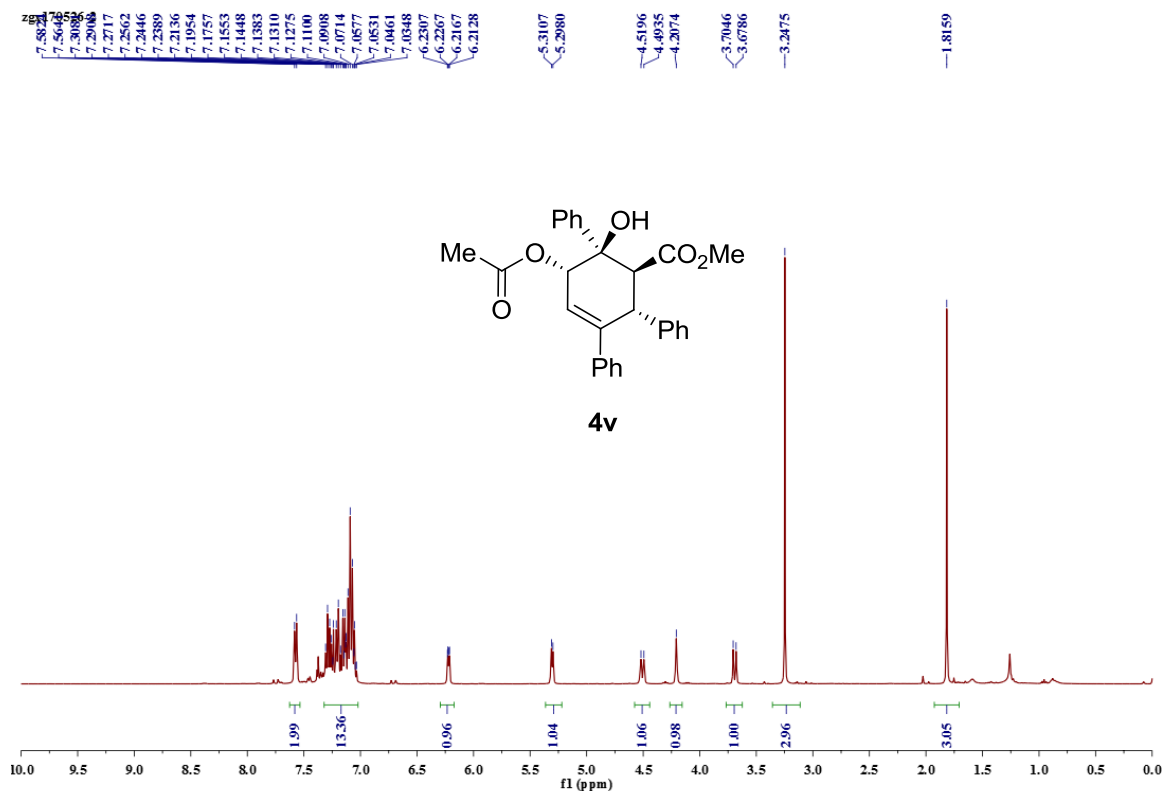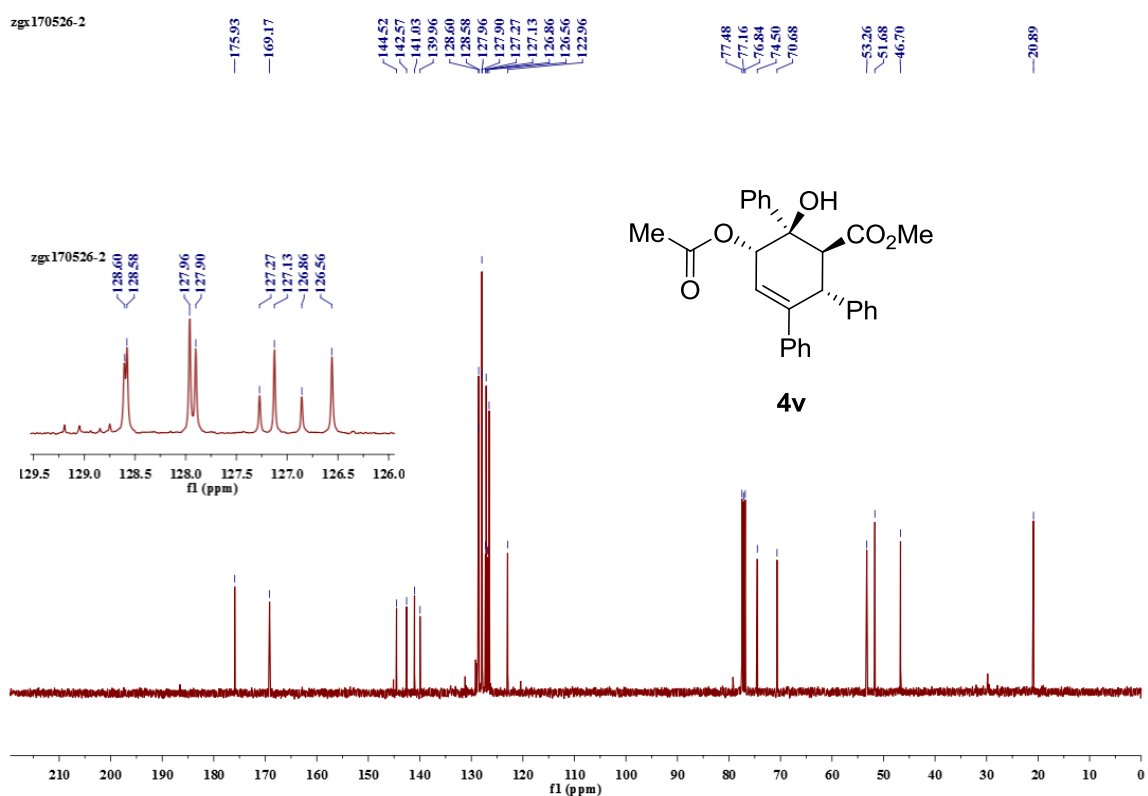

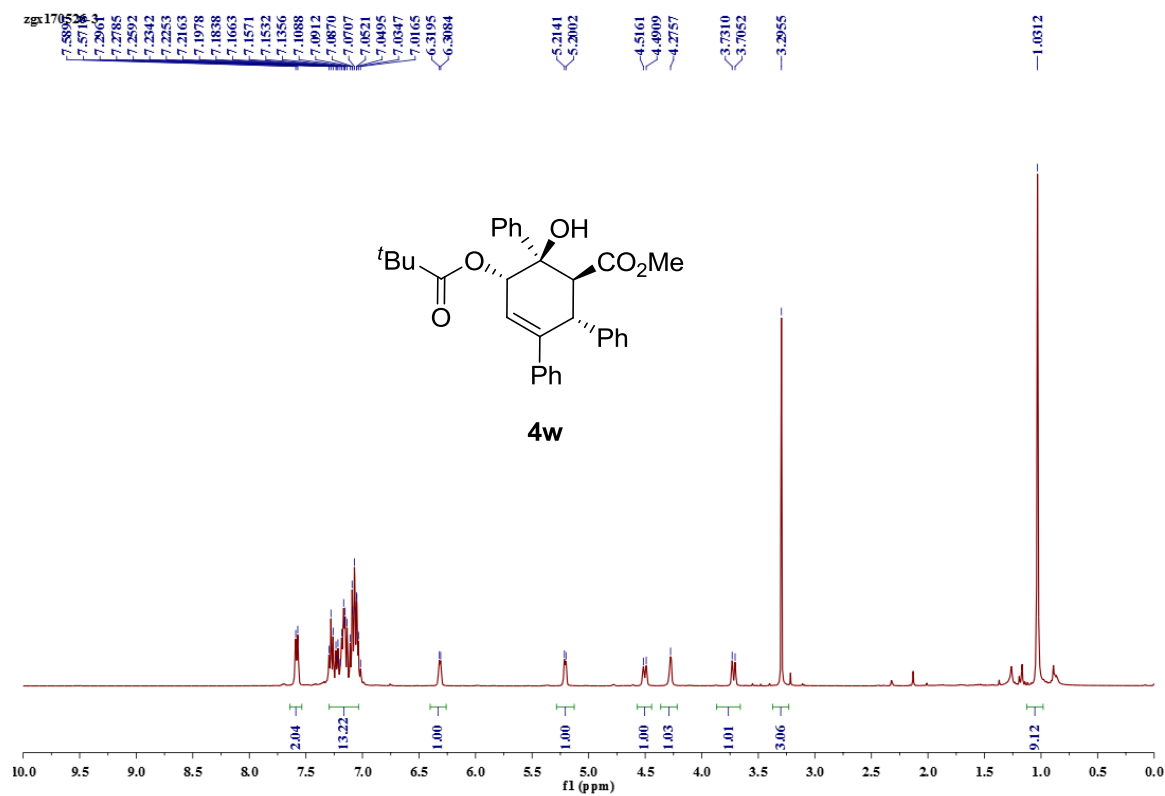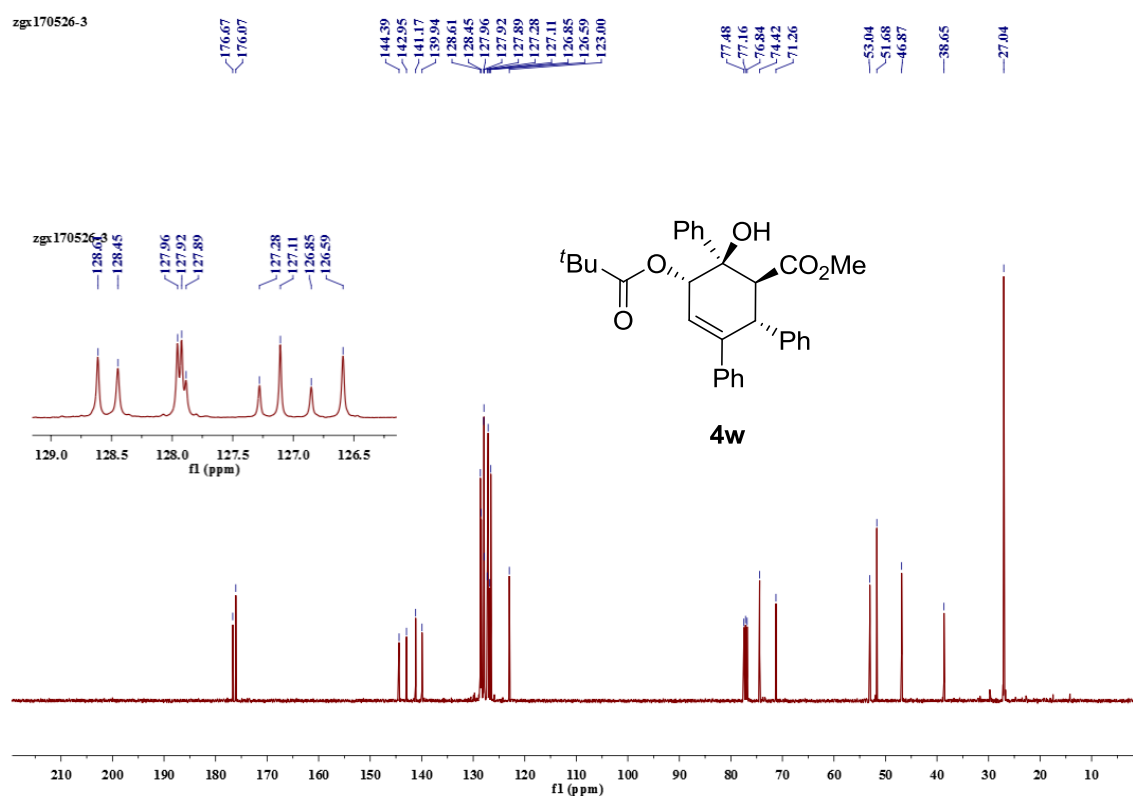

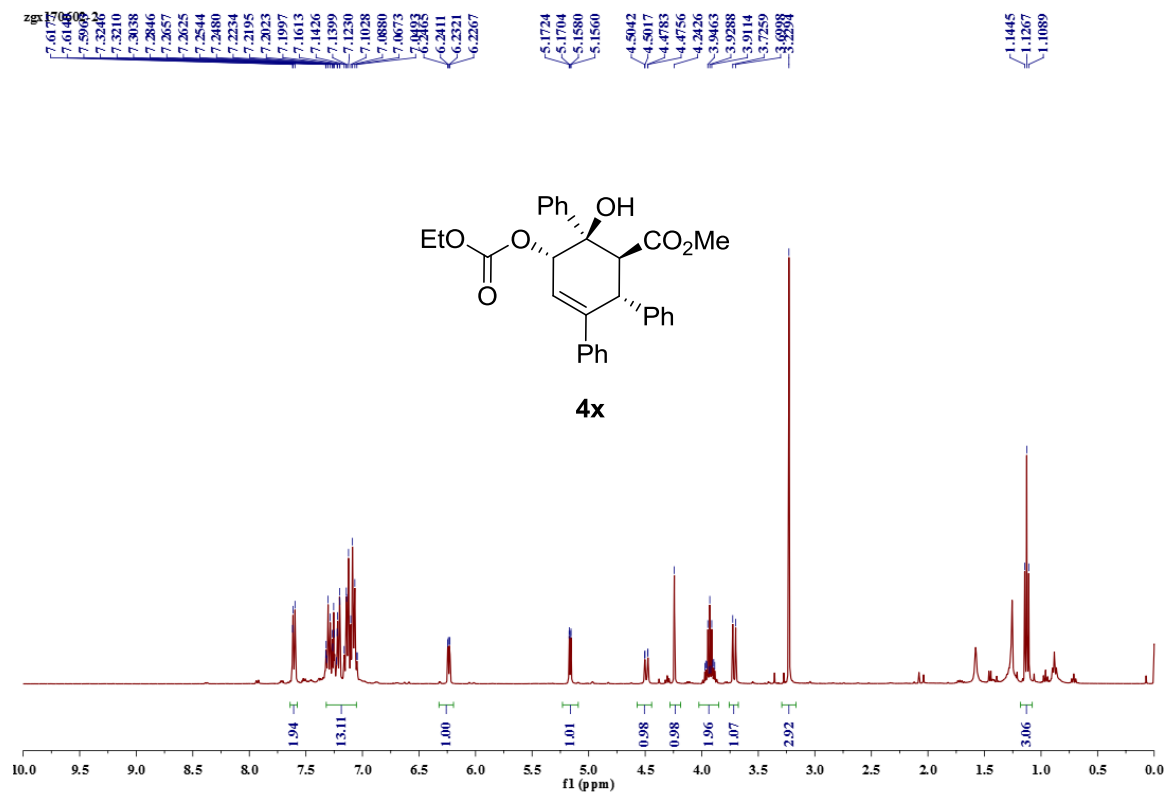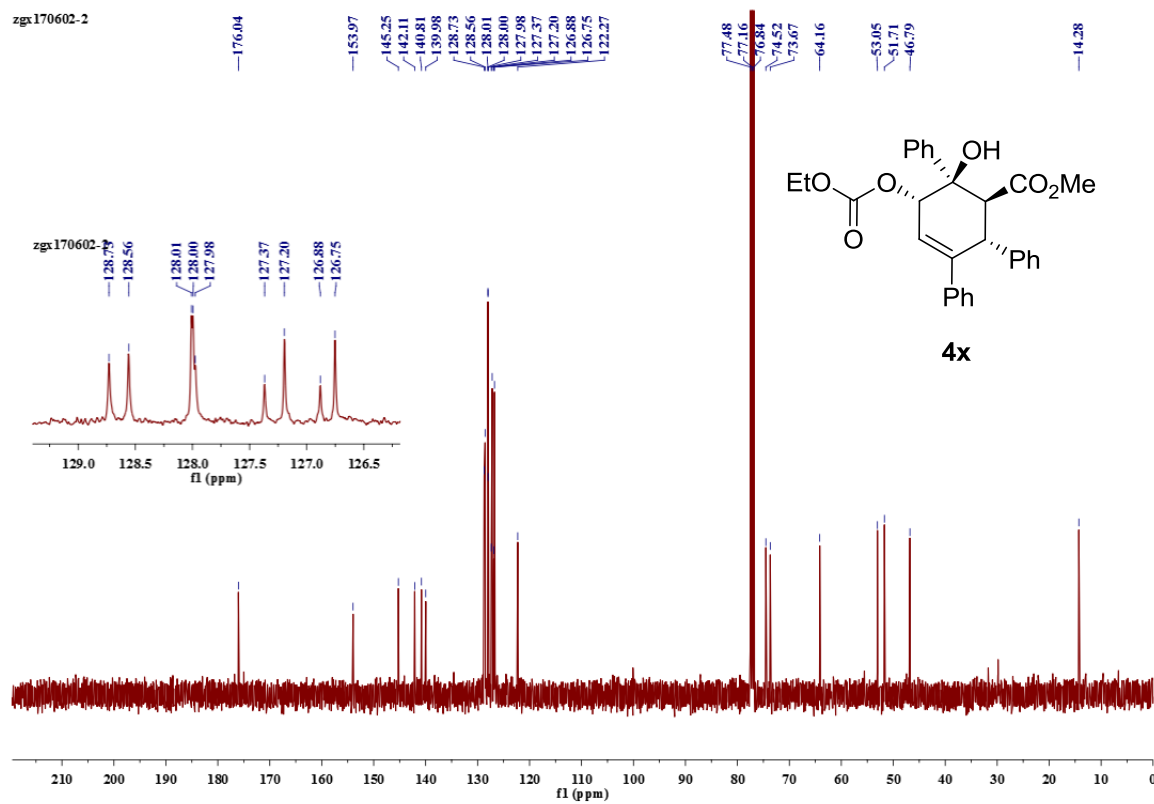

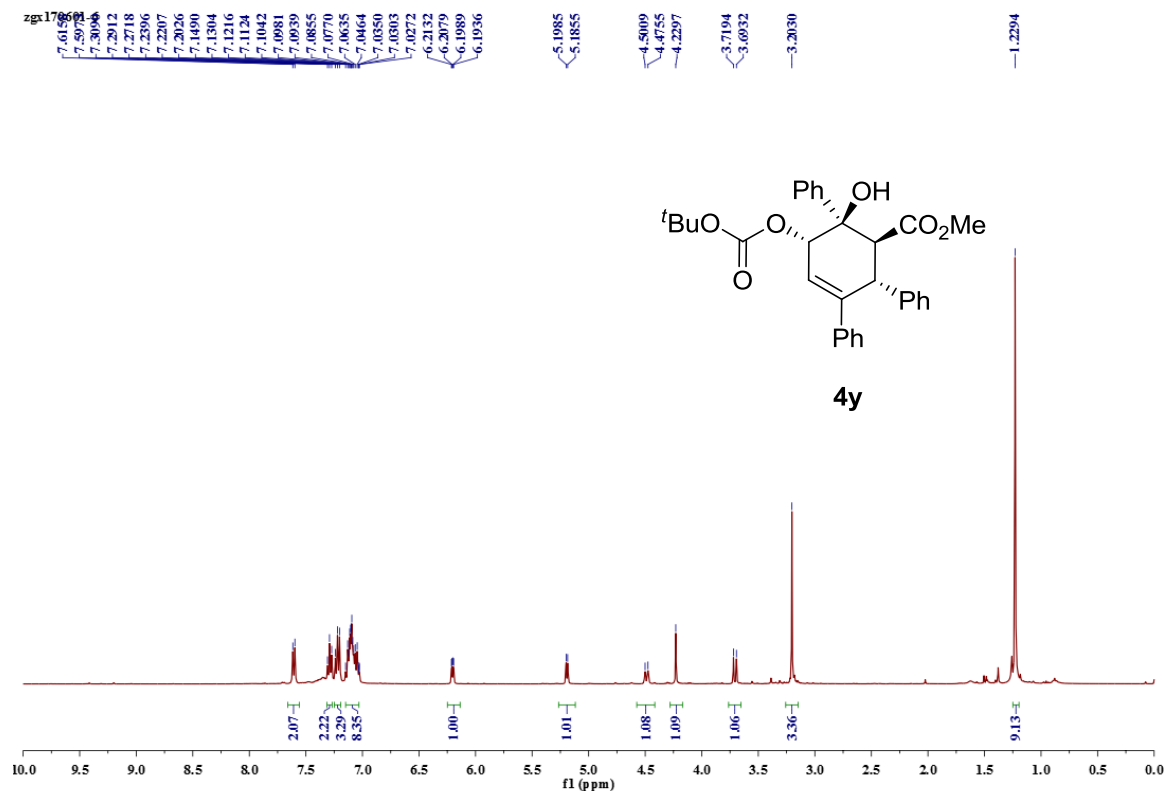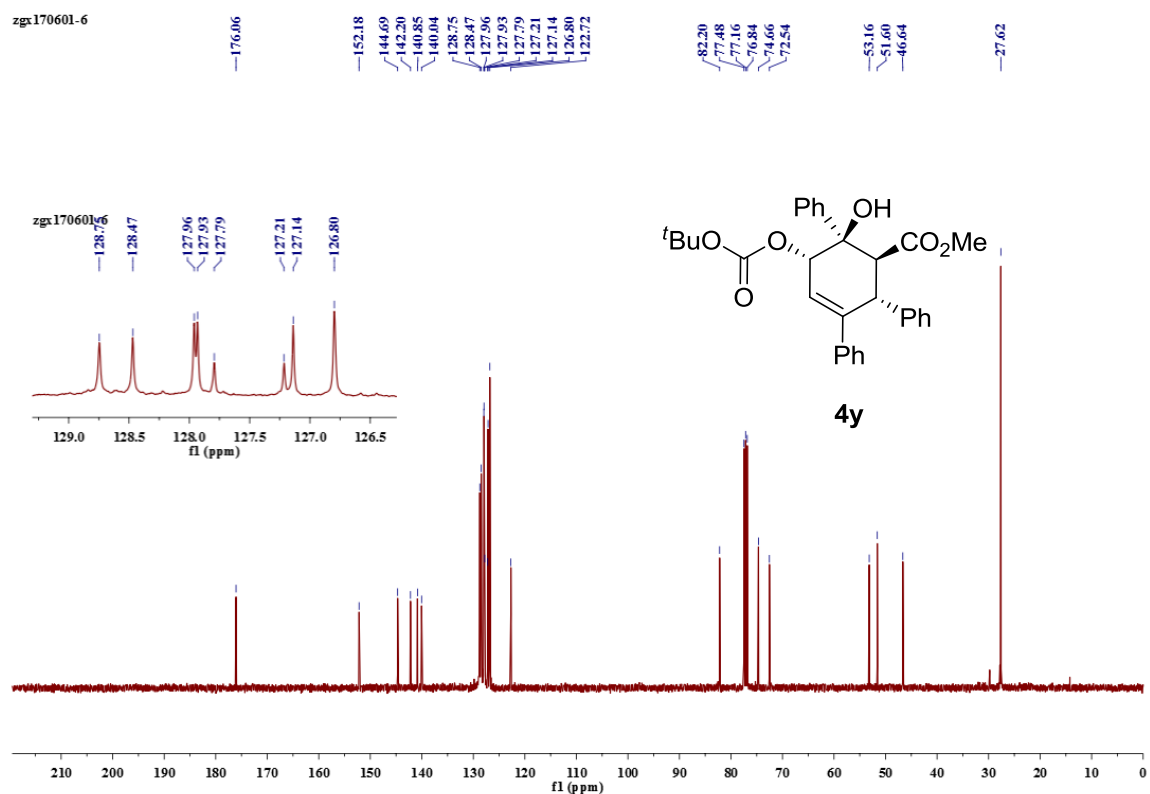

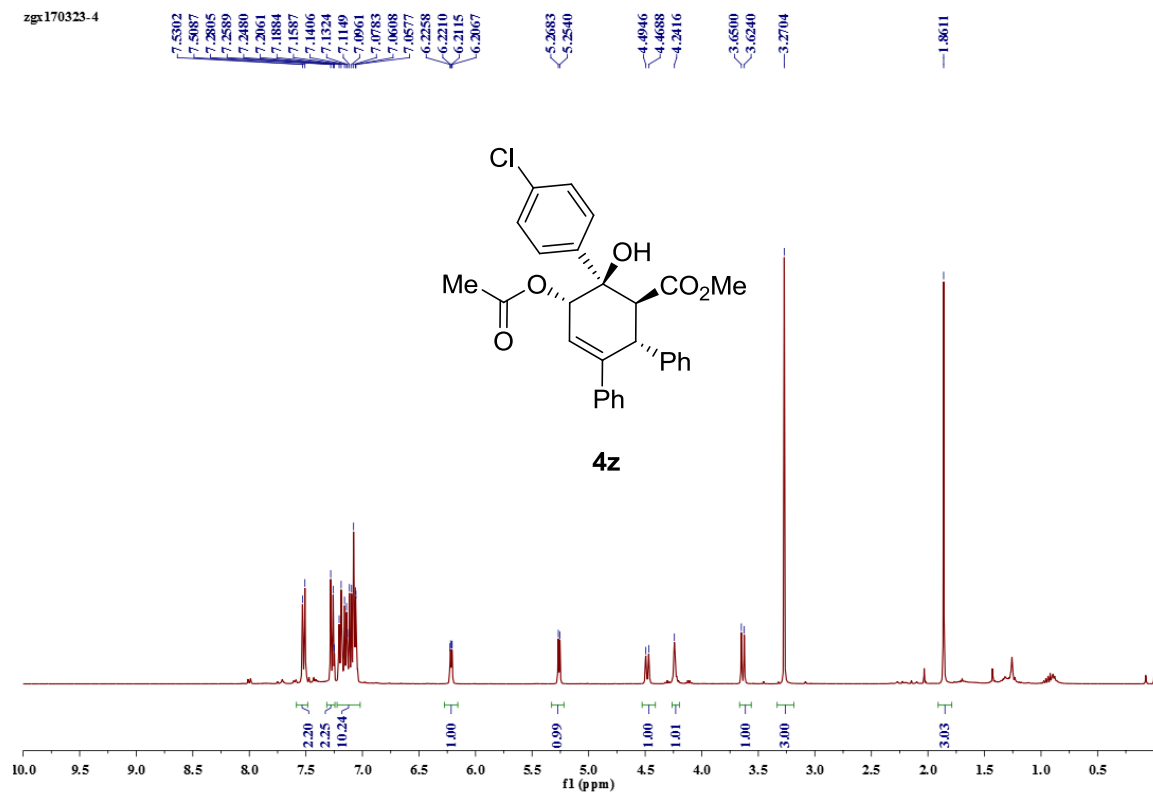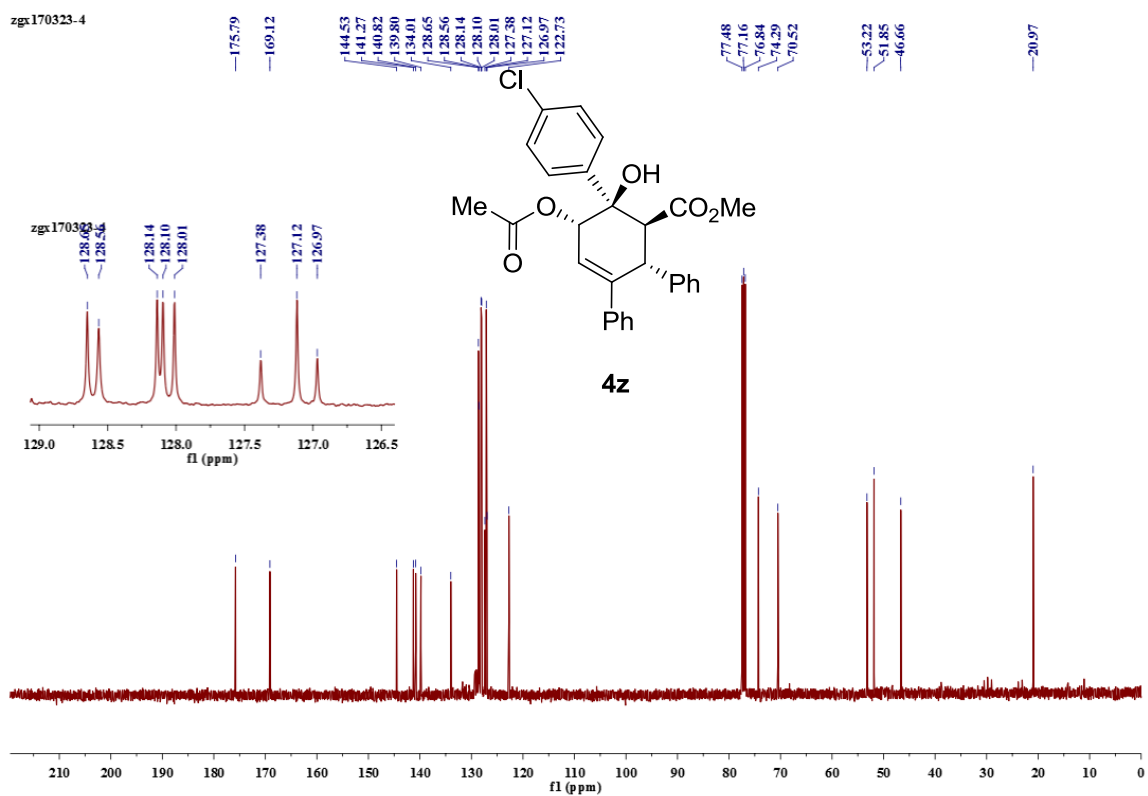

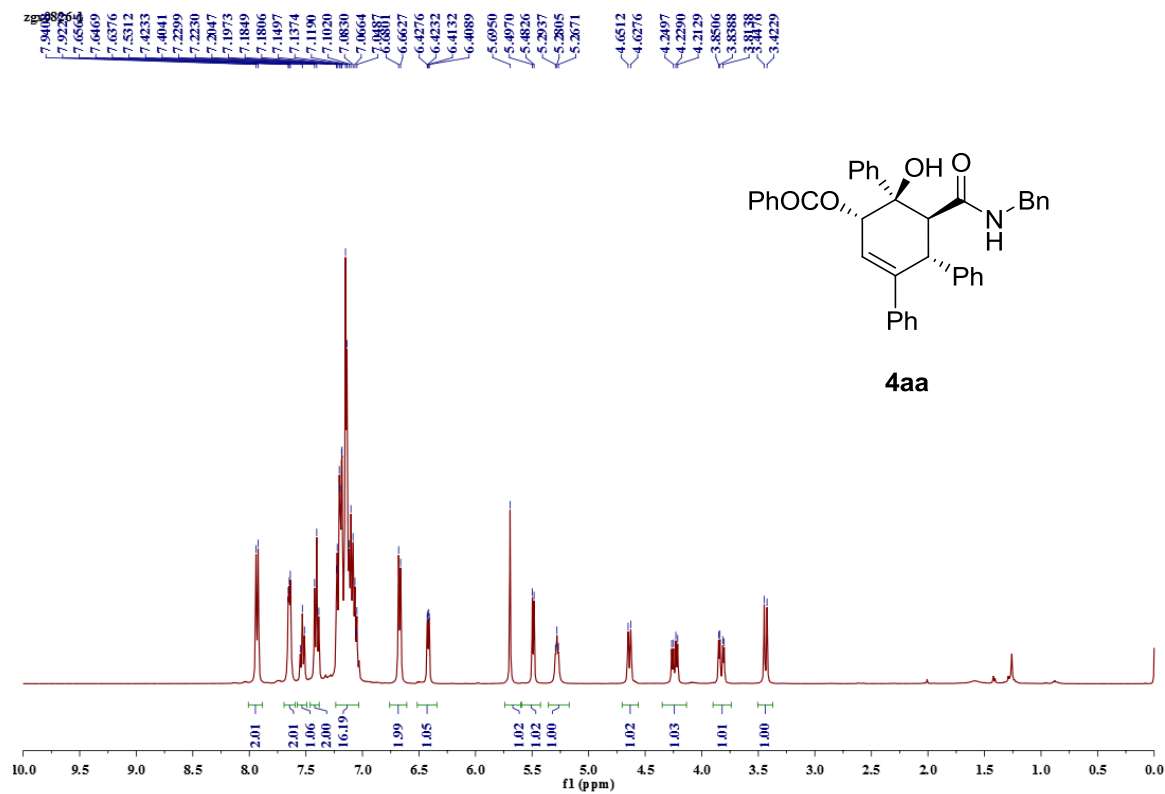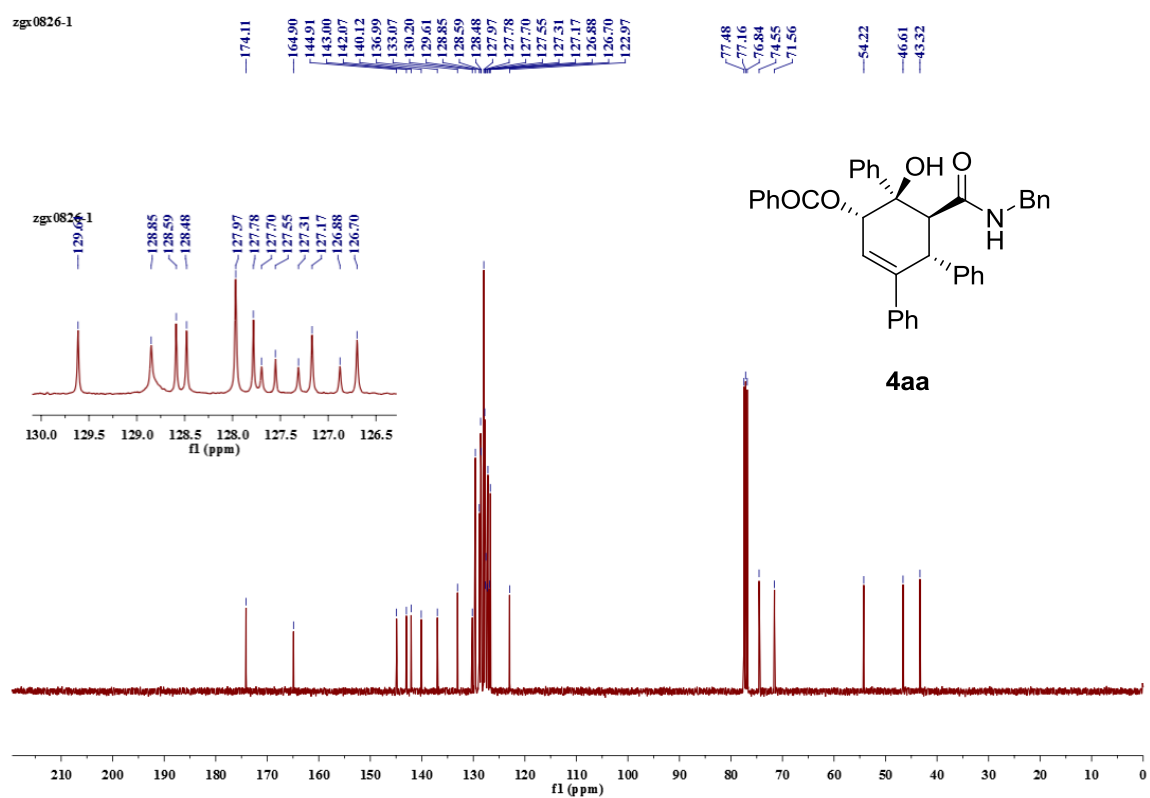

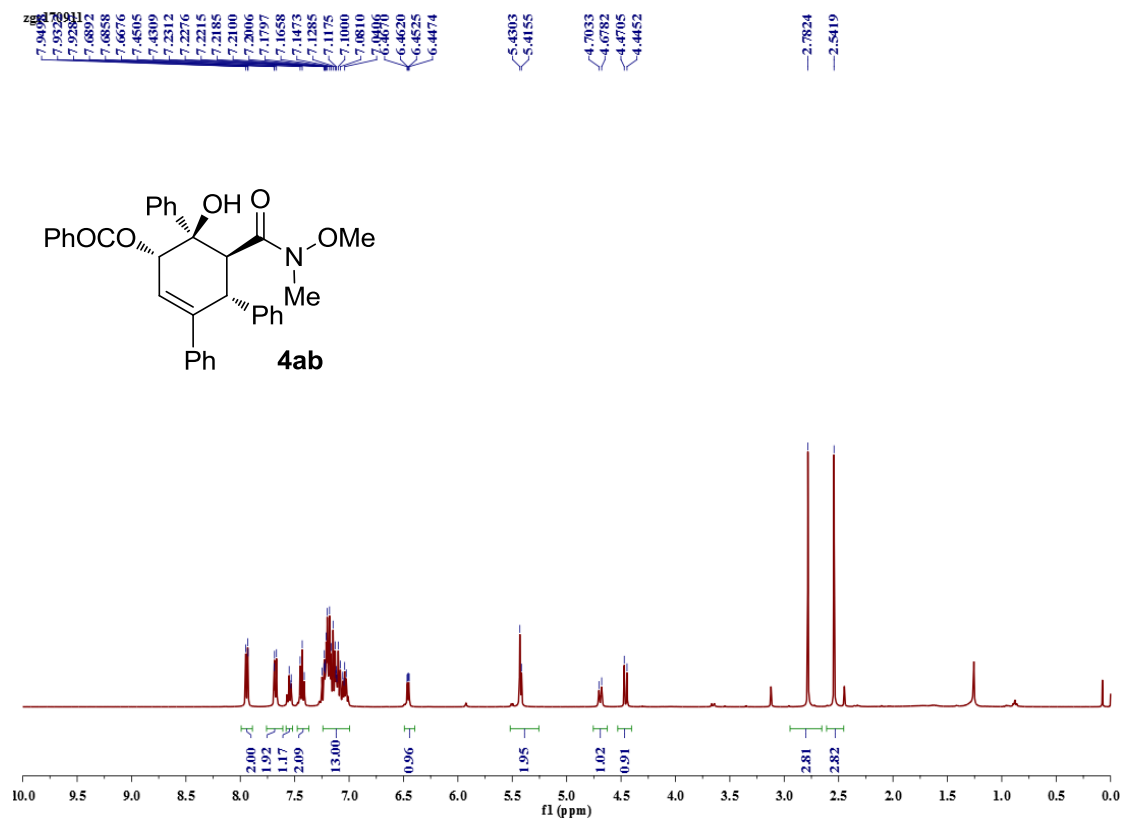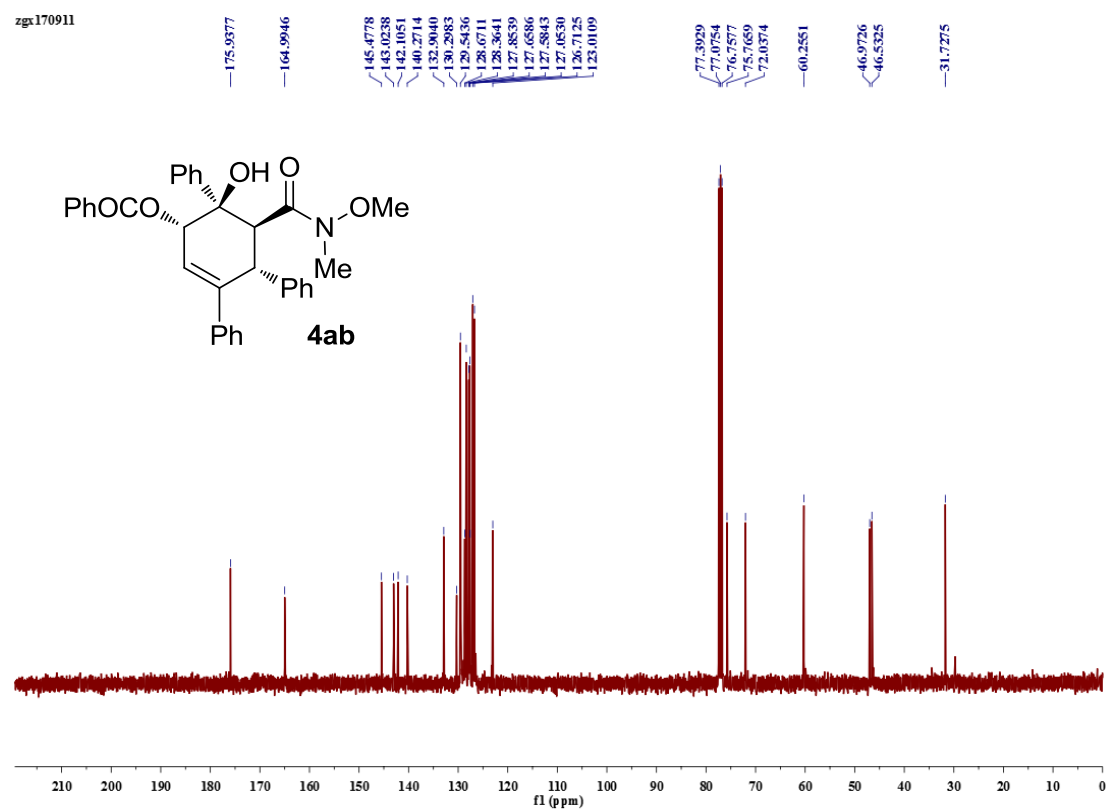

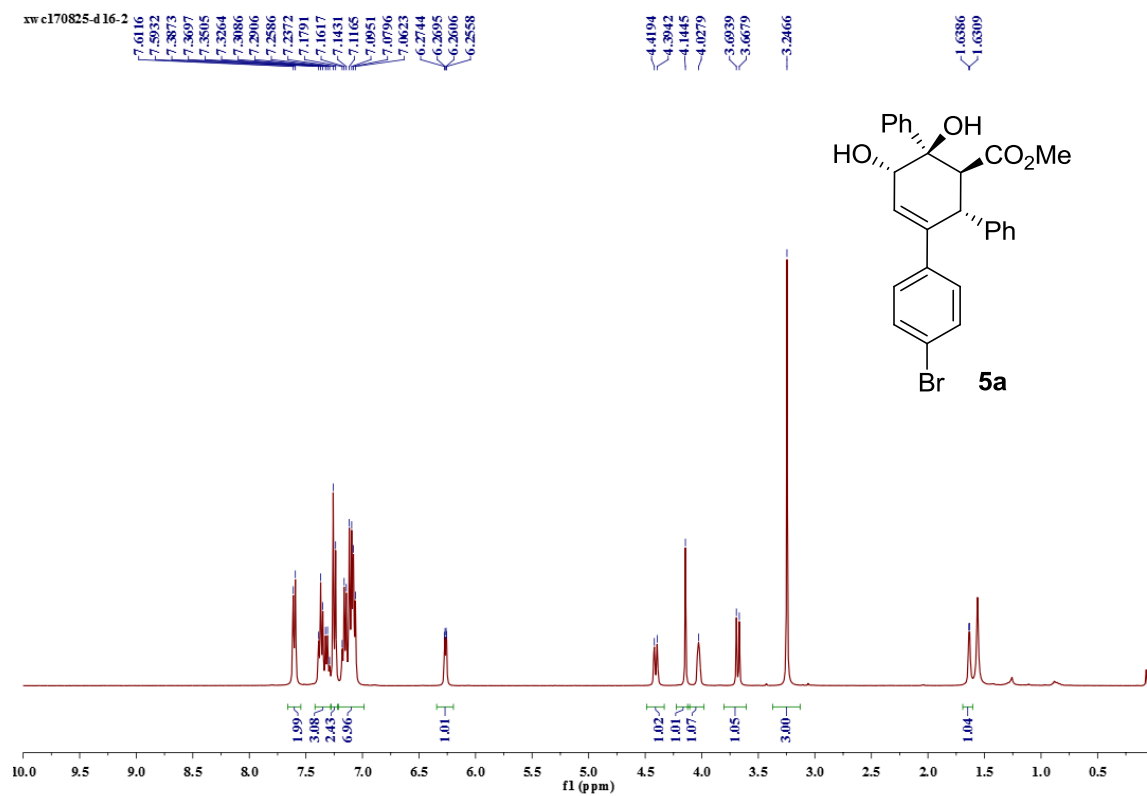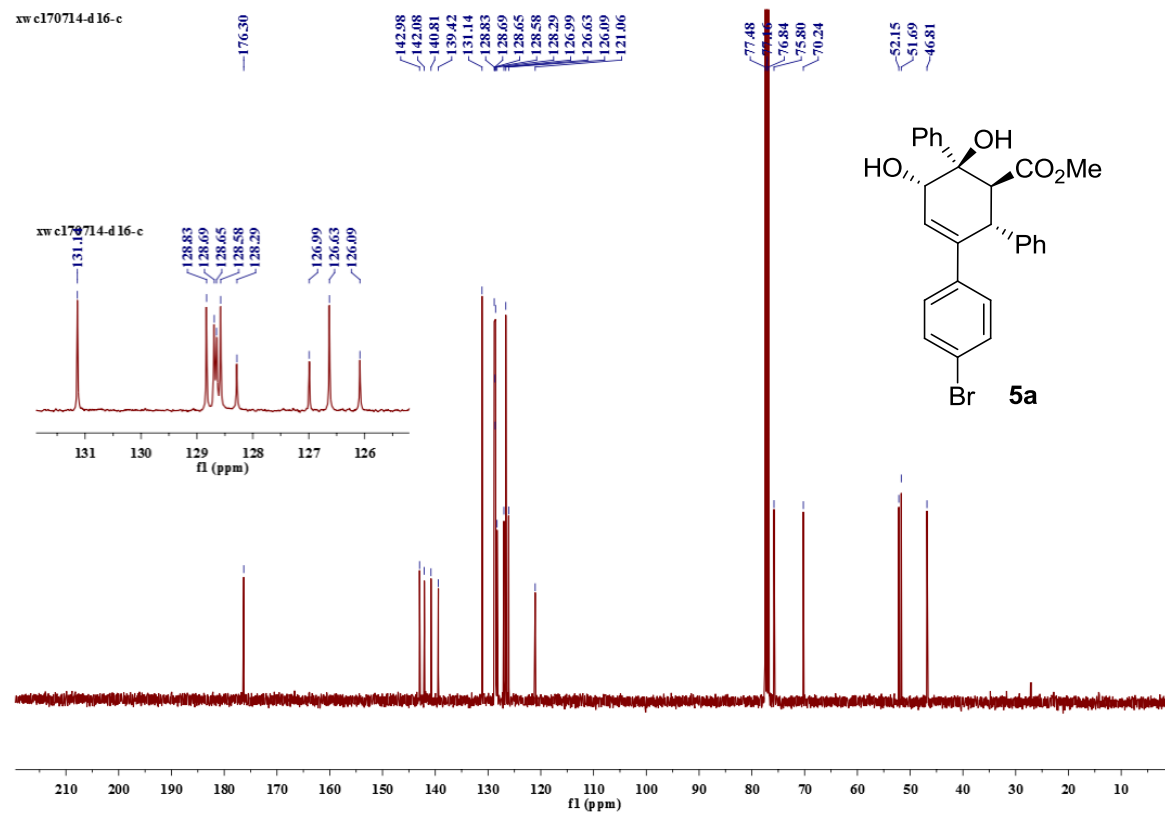

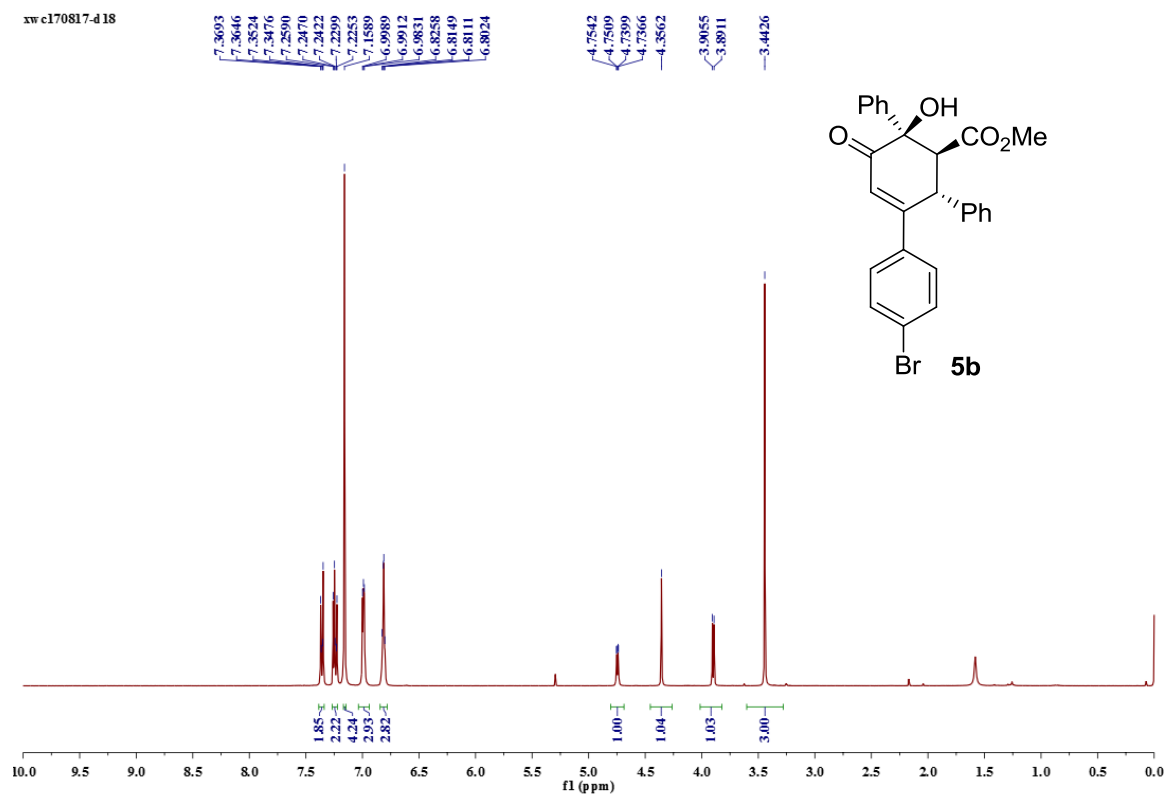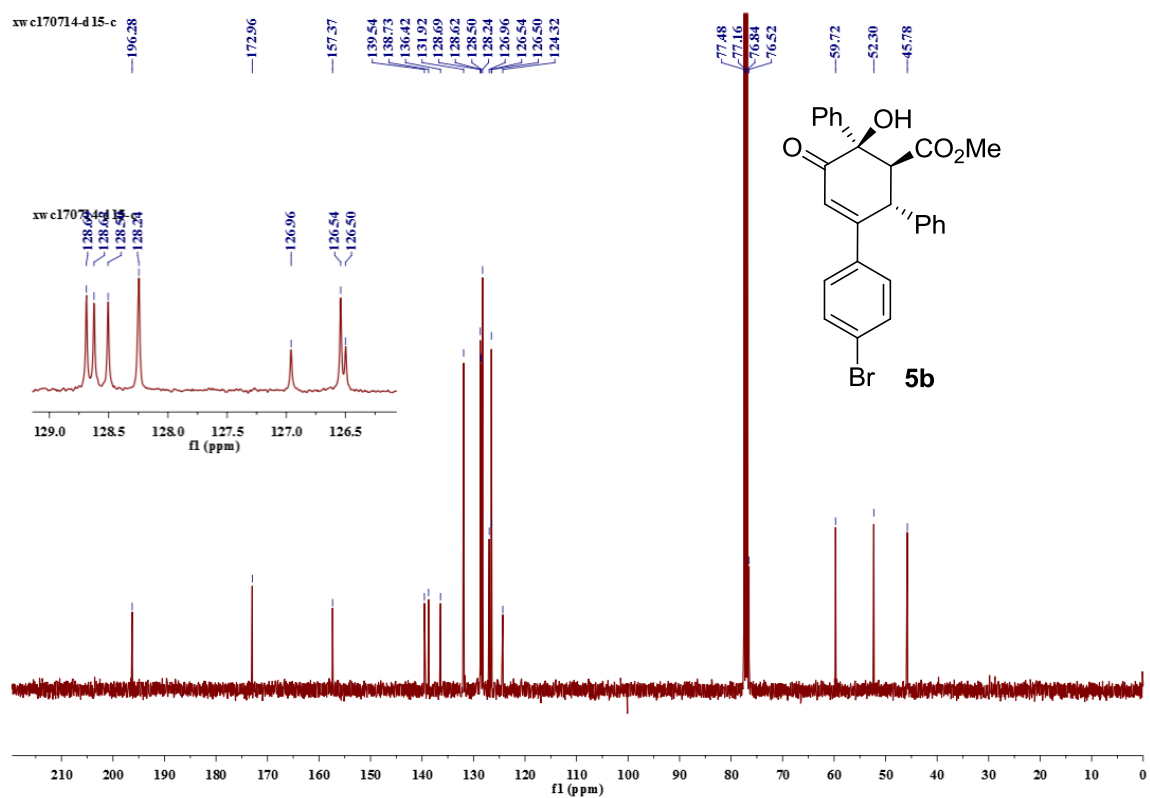



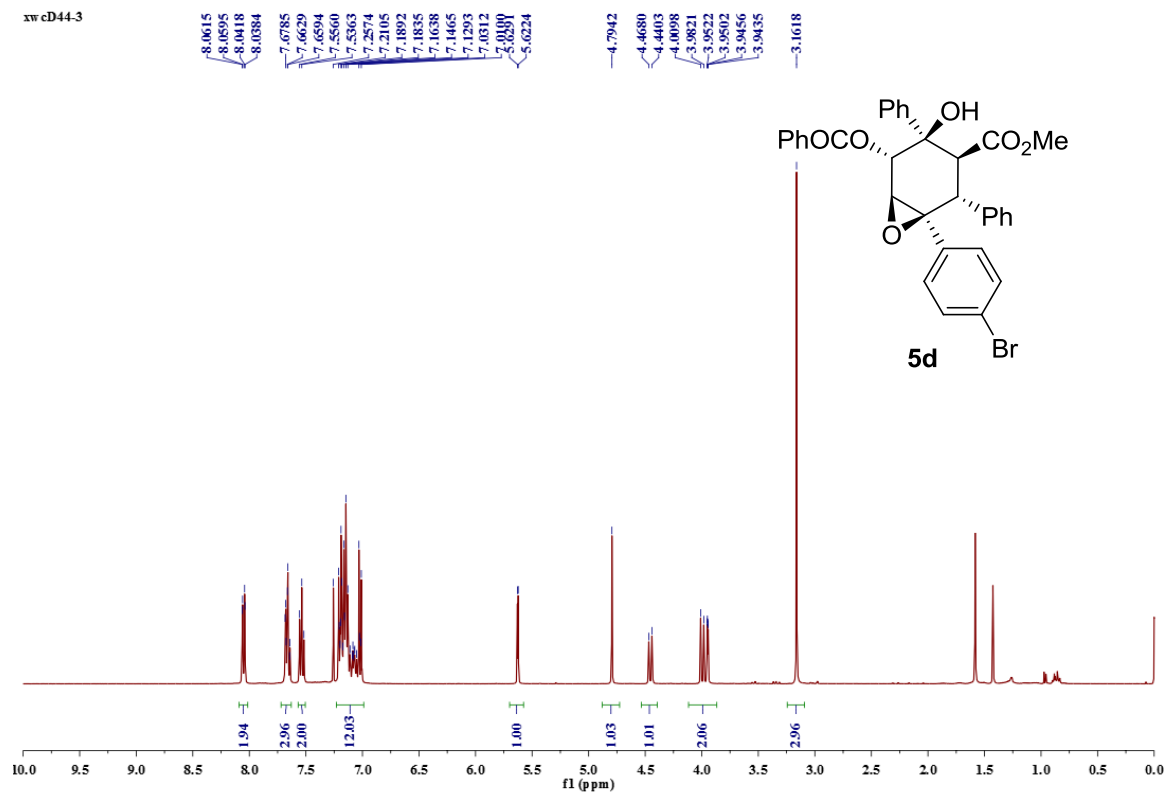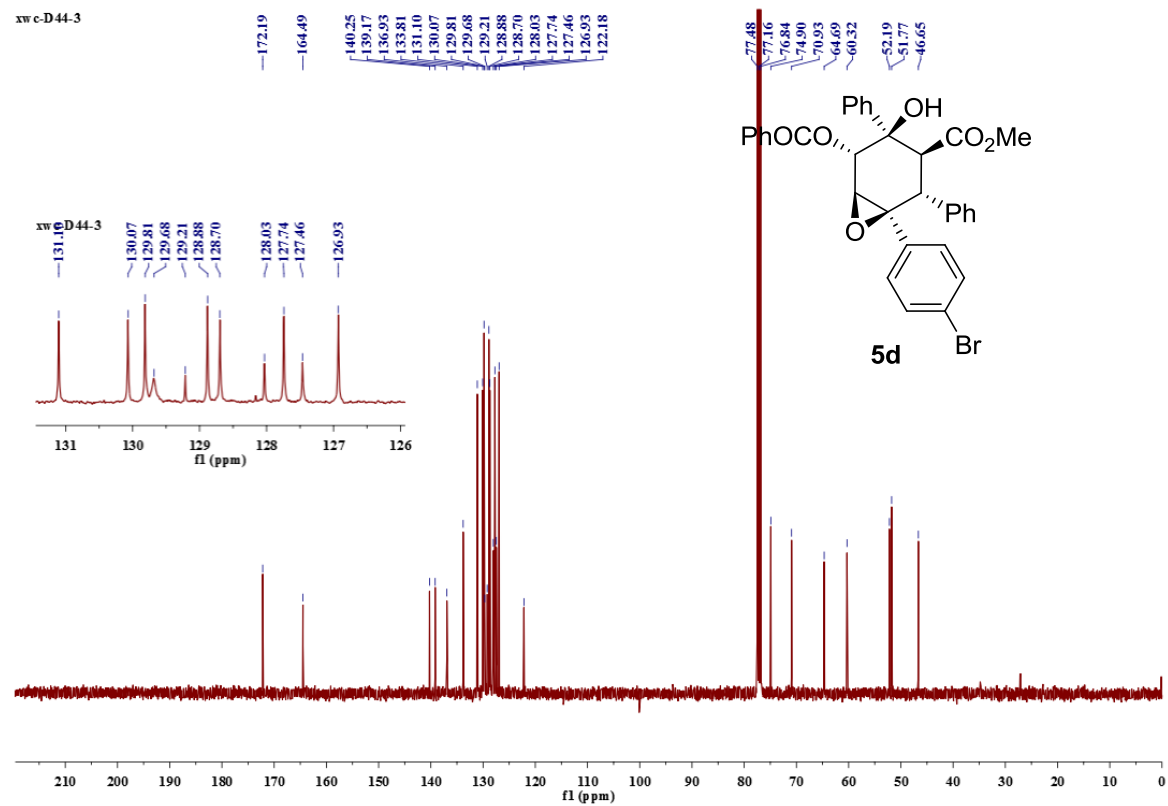

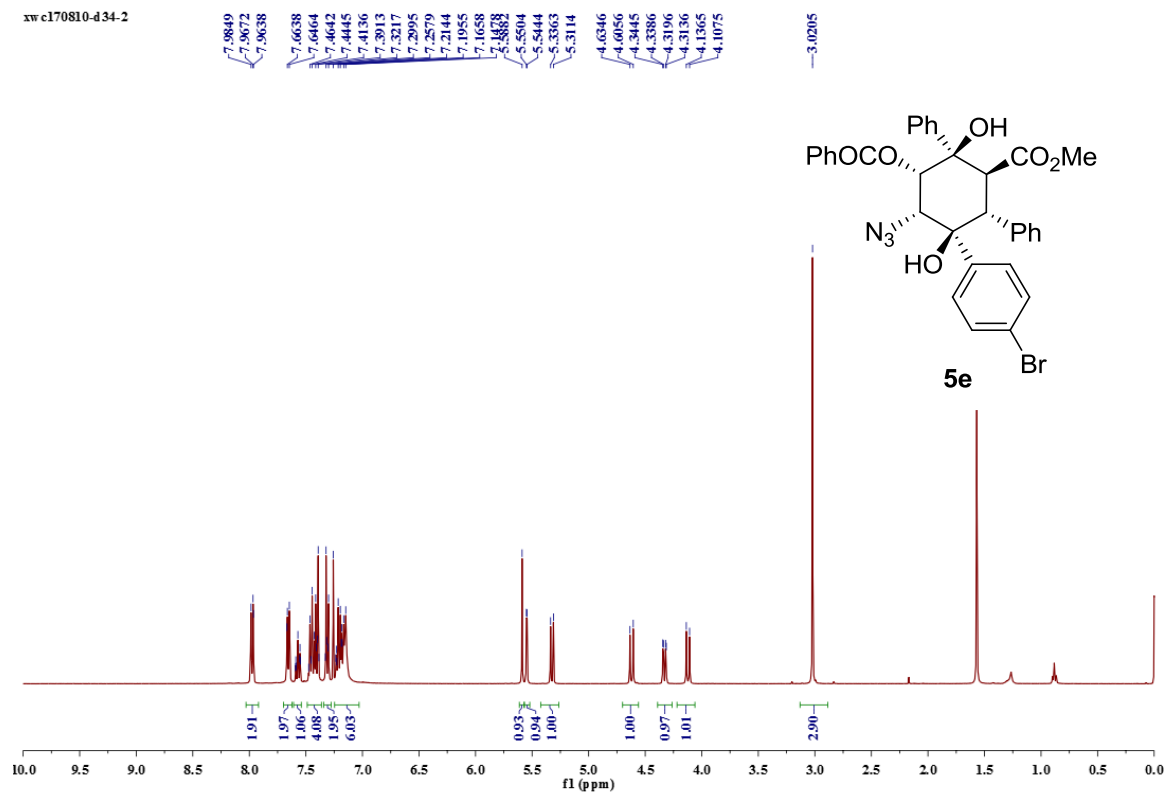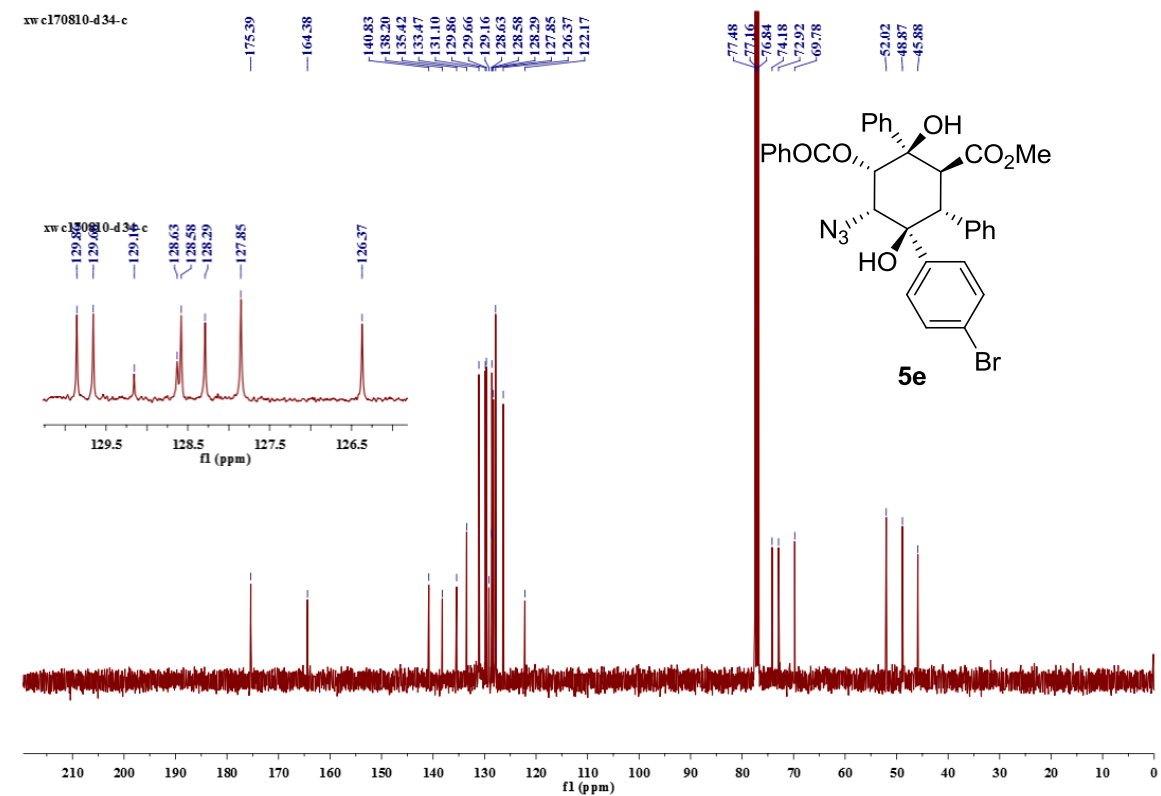

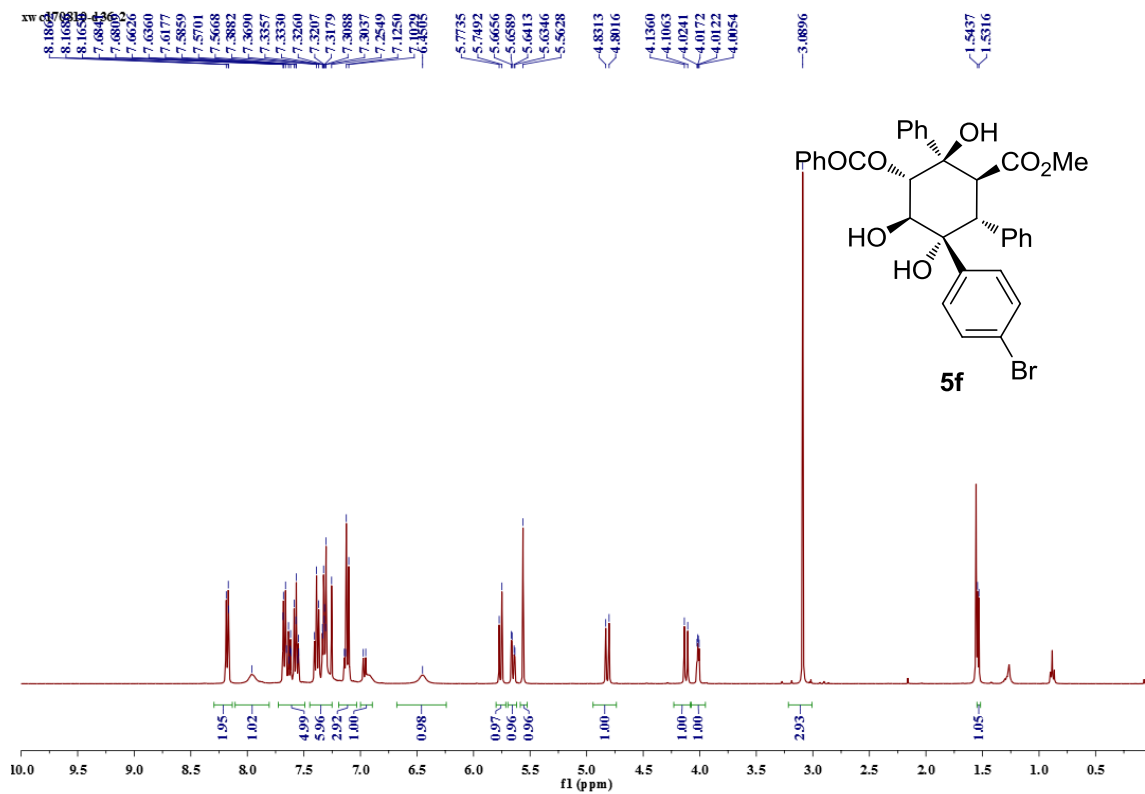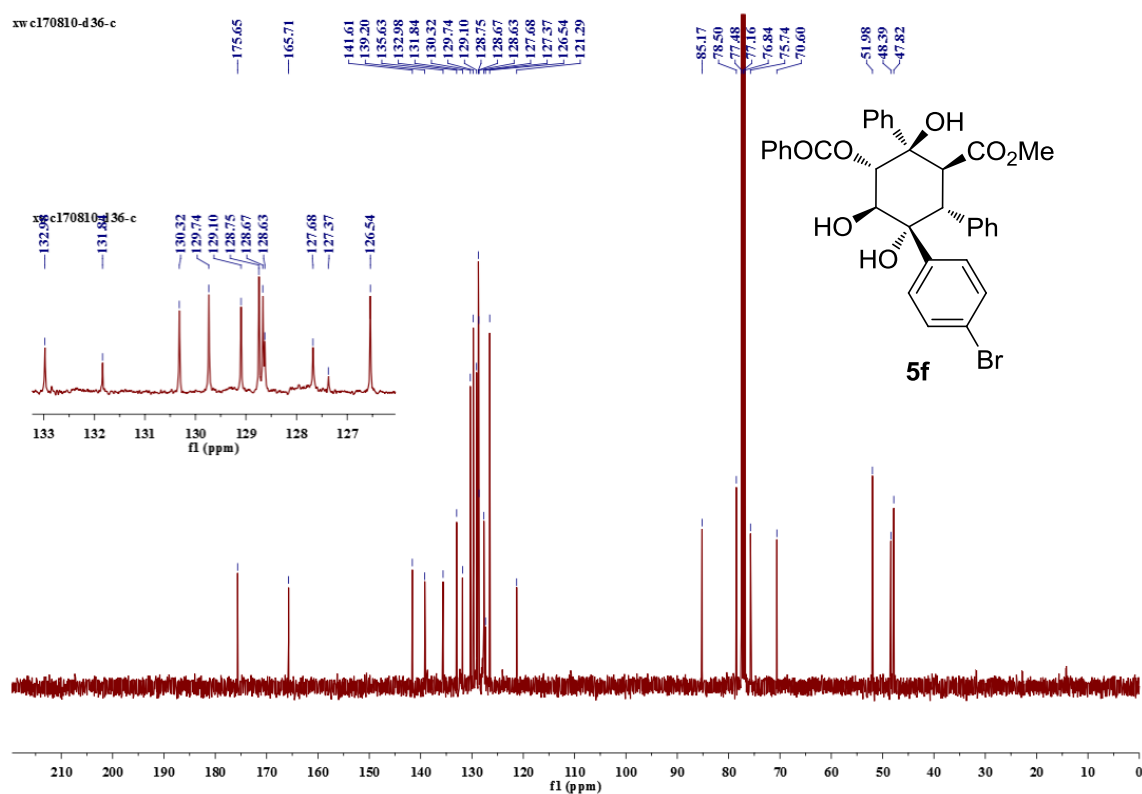

## VII. HPLC Spectra for ee Determination.

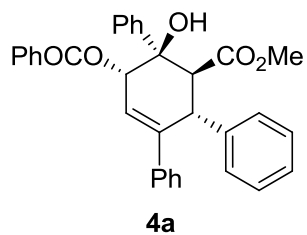

### <Chromatogram>

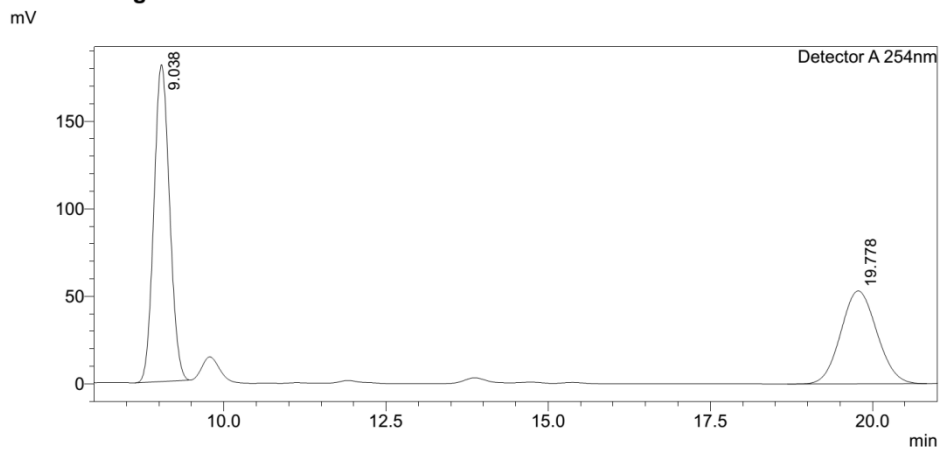

### <Peak Table>

| Detector A 254nm |           |         |        |        |      |      |      |
|------------------|-----------|---------|--------|--------|------|------|------|
| Peak#            | Ret. Time | Area    | Height | Conc.  | Unit | Mark | Name |
| 1                | 9.038     | 3053209 | 180957 | 59.779 |      |      |      |
| 2                | 19.778    | 2054258 | 53057  | 40.221 |      |      |      |
| Total            |           | 5107467 | 234014 |        |      |      |      |

### <Chromatogram>

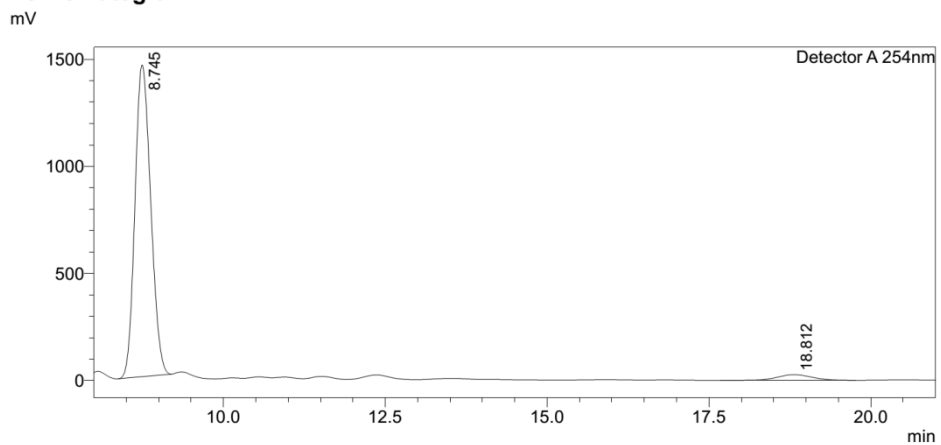

### <Peak Table>

| Detector A 254nm |           |          |         |        |      |      |      |
|------------------|-----------|----------|---------|--------|------|------|------|
| Peak#            | Ret. Time | Area     | Height  | Conc.  | Unit | Mark | Name |
| 1                | 8.745     | 24689773 | 1455745 | 96.241 |      |      |      |
| 2                | 18.812    | 964419   | 25945   | 3.759  |      |      |      |
| Total            |           | 25654192 | 1481690 |        |      |      |      |

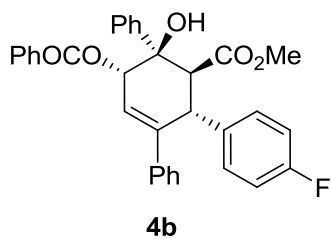

### <Chromatogram>

mV

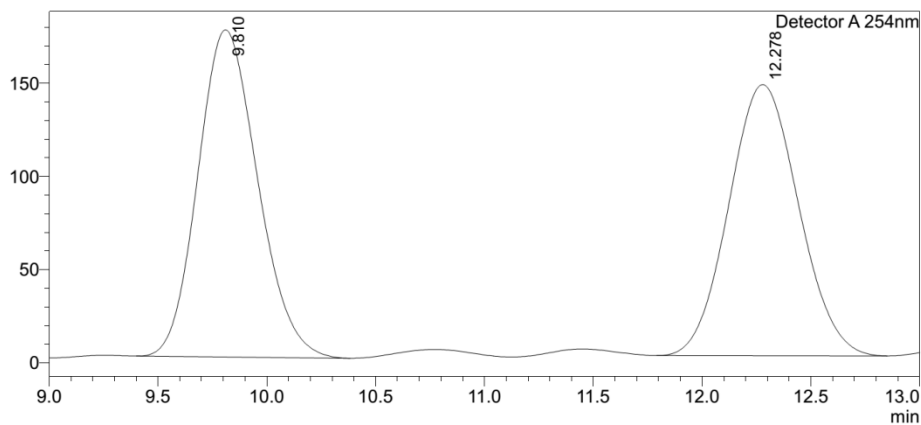

### <Peak Table>

Detector A 254nm

| Peak# | Ret. Time | Area    | Height | Conc.  | Unit | Mark | Name |
|-------|-----------|---------|--------|--------|------|------|------|
| 1     | 9.810     | 3352897 | 175603 | 50.822 |      |      |      |
| 2     | 12.278    | 3244447 | 145494 | 49.178 |      |      |      |
| Total |           | 6597344 | 321097 |        |      |      |      |

### <Chromatogram>

mV

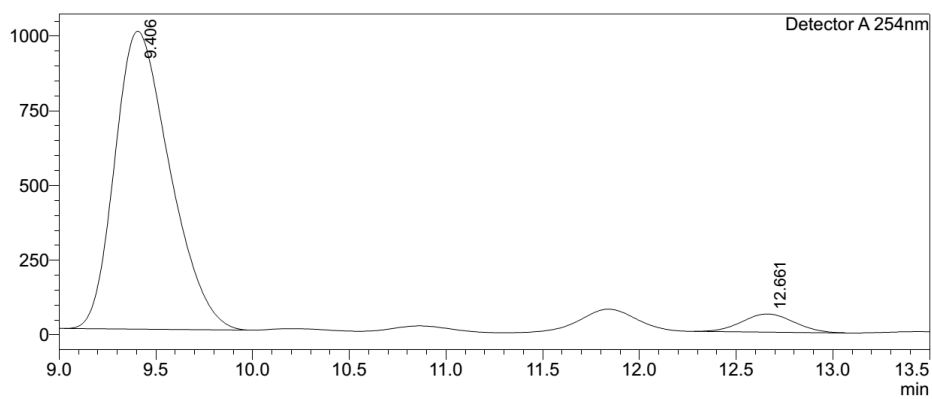

### <Peak Table>

Detector A 254nm

| Peak# | Ret. Time | Area     | Height  | Conc.  | Unit | Mark | Name |
|-------|-----------|----------|---------|--------|------|------|------|
| 1     | 9.406     | 19775597 | 997273  | 94.526 |      |      |      |
| 2     | 12.661    | 1145108  | 60966   | 5.474  |      |      |      |
| Total |           | 20920705 | 1058239 |        |      |      |      |

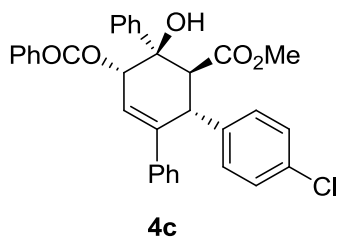

<Chromatogram>

mV

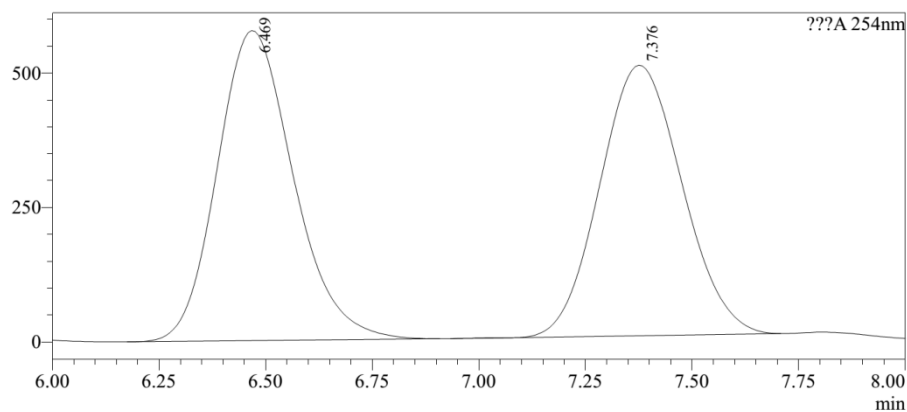

<Peak Table>

???A 254nm

| Peak# | Ret. Time | Area     | Height  | Conc.  | Unit | Mark | Name |
|-------|-----------|----------|---------|--------|------|------|------|
| 1     | 6.469     | 7163572  | 576989  | 51.450 |      |      |      |
| 2     | 7.376     | 6759884  | 503521  | 48.550 |      |      |      |
| Total |           | 13923456 | 1080510 |        |      |      |      |

<Chromatogram>

mV

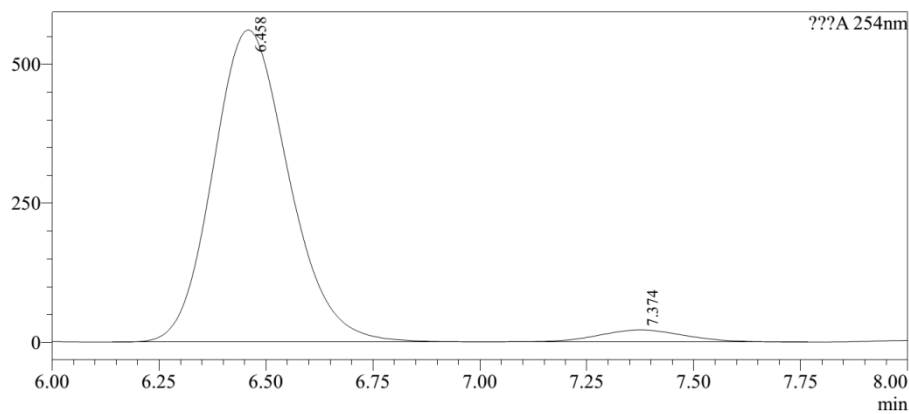

<Peak Table>

???A 254nm

| Peak# | Ret. Time | Area    | Height | Conc.  | Unit | Mark | Name |
|-------|-----------|---------|--------|--------|------|------|------|
| 1     | 6.458     | 6917436 | 561570 | 95.639 |      |      |      |
| 2     | 7.374     | 315417  | 21806  | 4.361  |      | V    |      |
| Total |           | 7232853 | 583376 |        |      |      |      |

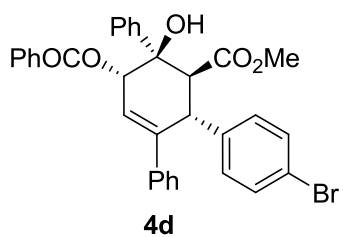

<Chromatogram>

mV

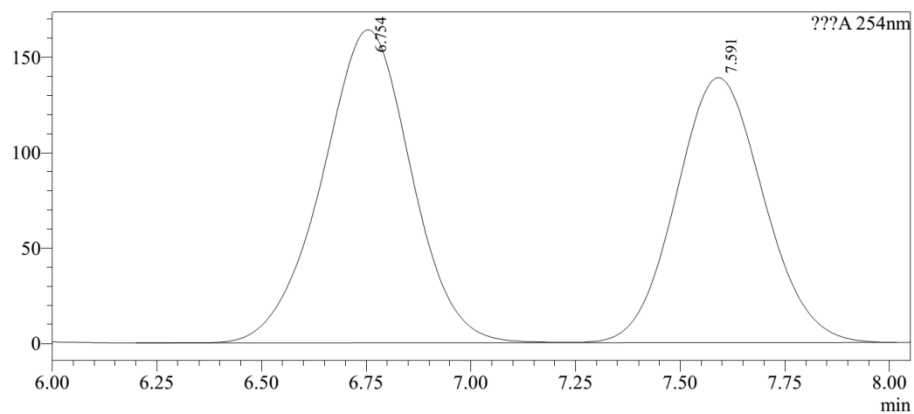

<Peak Table>

??A 254nm

| Peak# | Ret. Time | Area    | Height | Conc.  | Unit | Mark | Name |
|-------|-----------|---------|--------|--------|------|------|------|
| 1     | 6.754     | 2433275 | 164080 | 54.617 |      |      |      |
| 2     | 7.591     | 2021865 | 138965 | 45.383 |      | V    |      |
| Total |           | 4455139 | 303045 |        |      |      |      |

<Chromatogram>

mV

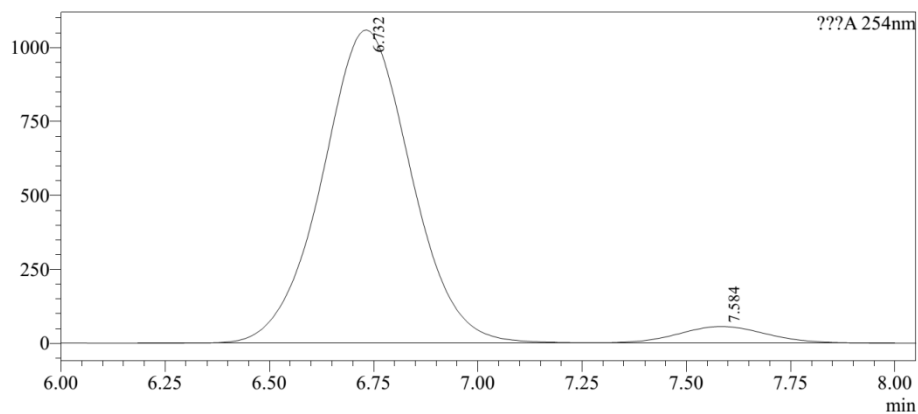

<Peak Table>

??A 254nm

| Peak# | Ret. Time | Area     | Height  | Conc.  | Unit | Mark | Name |
|-------|-----------|----------|---------|--------|------|------|------|
| 1     | 6.732     | 15727346 | 1059611 | 94.948 |      |      |      |
| 2     | 7.584     | 836814   | 56396   | 5.052  |      | V    |      |
| Total |           | 16564160 | 1116007 |        |      |      |      |

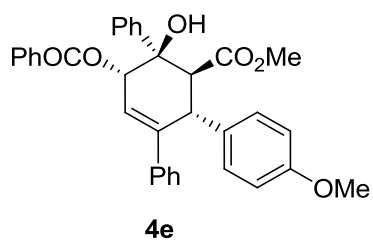

### <Chromatogram>

mV

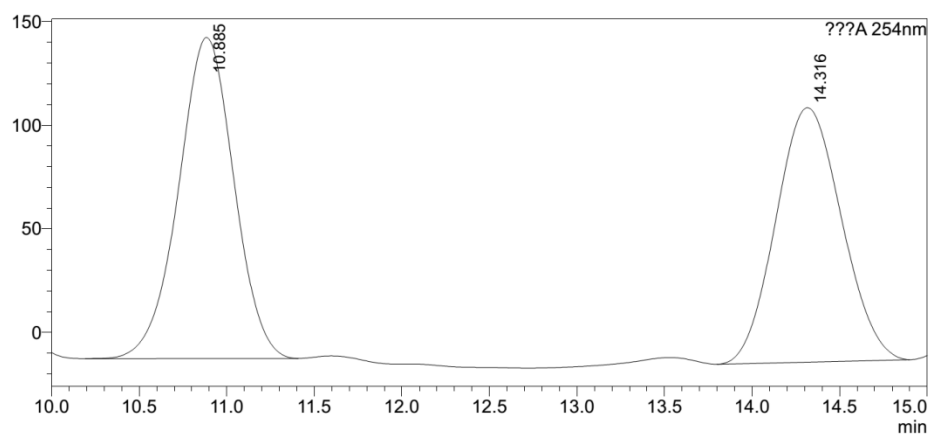

### <Peak Table>

???A 254nm

| Peak# | Ret. Time | Area    | Height | Conc.  | Unit | Mark | Name |
|-------|-----------|---------|--------|--------|------|------|------|
| 1     | 10.885    | 3411542 | 154929 | 51.645 |      |      |      |
| 2     | 14.316    | 3194237 | 122751 | 48.355 |      |      |      |
| Total |           | 6605779 | 277680 |        |      |      |      |

### <Chromatogram>

mV

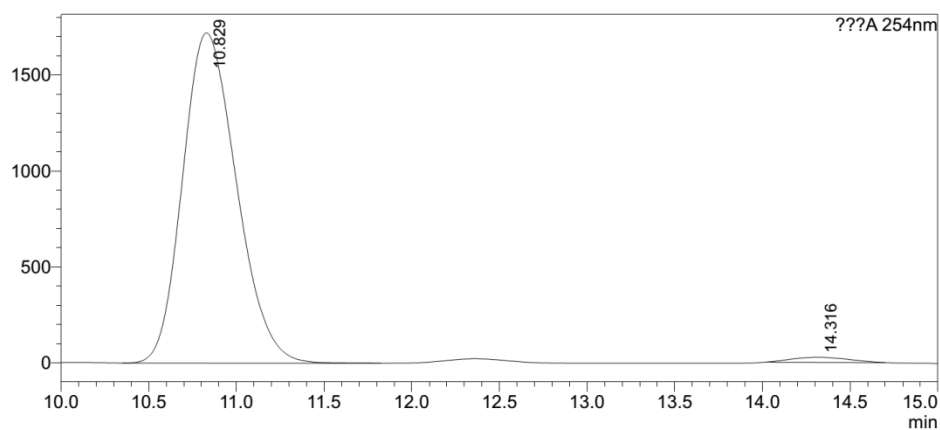

### <Peak Table>

???A 254nm

| Peak# | Ret. Time | Area     | Height  | Conc.  | Unit | Mark | Name |
|-------|-----------|----------|---------|--------|------|------|------|
| 1     | 10.829    | 36761386 | 1719228 | 98.441 |      |      |      |
| 2     | 14.316    | 582165   | 26029   | 1.559  |      | M    |      |
| Total |           | 37343552 | 1745256 |        |      |      |      |

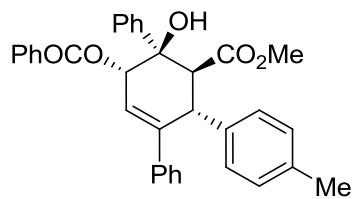

4f

# <Chromatogram>

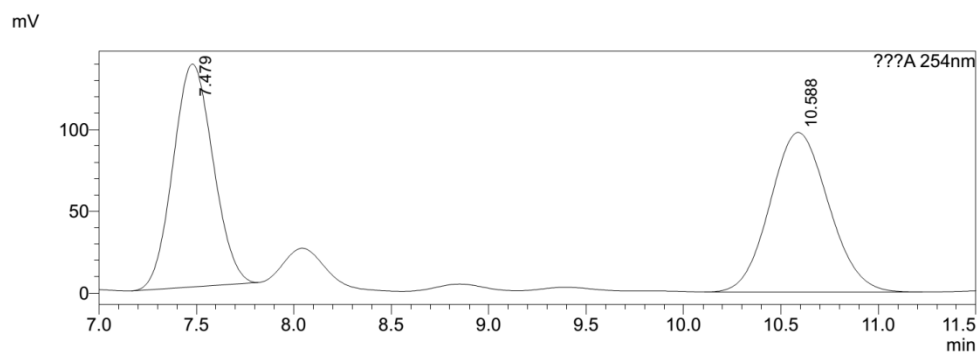

## <Peak Table>

??A 254nm

| Peak# | Ret. Time | Area    | Height | Conc.  | Unit | Mark | Name |
|-------|-----------|---------|--------|--------|------|------|------|
| 1     | 7.479     | 1954330 | 136293 | 48.902 |      |      |      |
| 2     | 10.588    | 2042129 | 97593  | 51.098 |      |      |      |
| Total |           | 3996459 | 233886 |        |      |      |      |

# <Chromatogram>

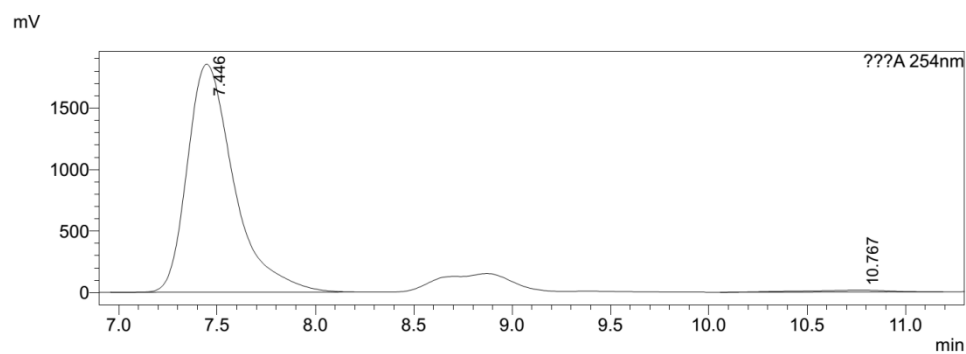

## <Peak Table>

??A 254nm

| Peak# | Ret. Time | Area     | Height  | Conc.  | Unit | Mark | Name |
|-------|-----------|----------|---------|--------|------|------|------|
| 1     | 7.446     | 30642298 | 1853182 | 98.543 |      |      |      |
| 2     | 10.767    | 452933   | 14577   | 1.457  |      |      |      |
| Total |           | 31095231 | 1867759 |        |      |      |      |

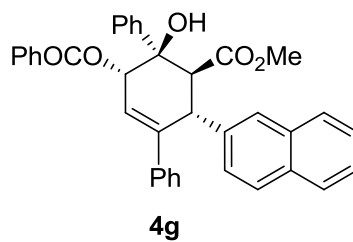

### <Chromatogram>

mV

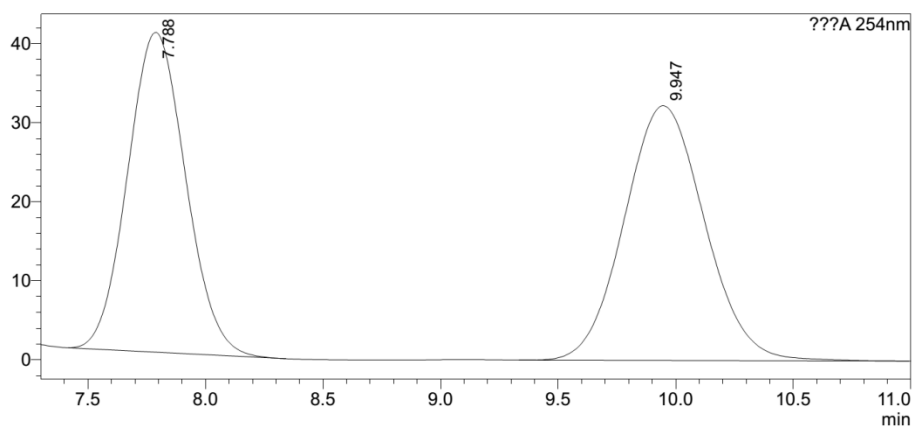

### <Peak Table>

???A 254nm

| Peak# | Ret. Time | Area    | Height | Conc.  | Unit | Mark | Name |
|-------|-----------|---------|--------|--------|------|------|------|
| 1     | 7.788     | 694518  | 40426  | 47.559 |      |      |      |
| 2     | 9.947     | 765797  | 32209  | 52.441 |      |      |      |
| Total |           | 1460315 | 72635  |        |      |      |      |

### <Chromatogram>

mV

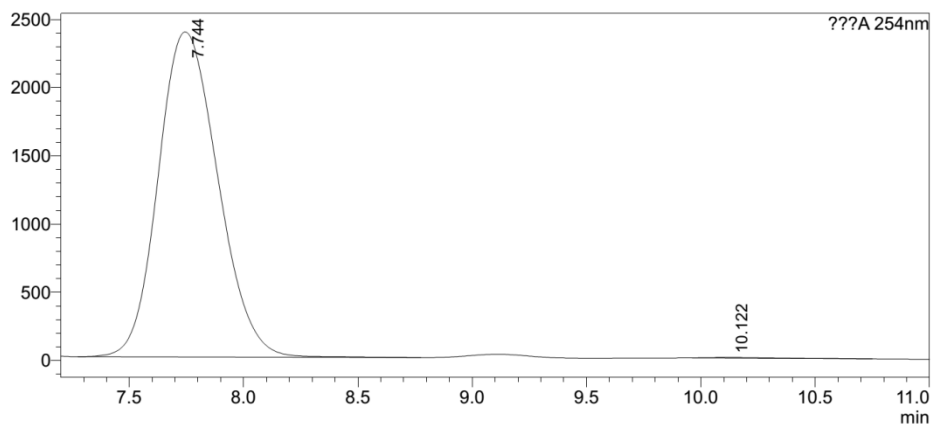

### <Peak Table>

???A 254nm

| Peak# | Ret. Time | Area     | Height  | Conc.  | Unit | Mark | Name |
|-------|-----------|----------|---------|--------|------|------|------|
| 1     | 7.744     | 43284870 | 2383657 | 99.688 |      |      |      |
| 2     | 10.122    | 135364   | 5284    | 0.312  |      | M    |      |
| Total |           | 43420234 | 2388941 |        |      |      |      |

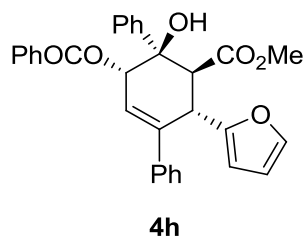

### <Chromatogram>

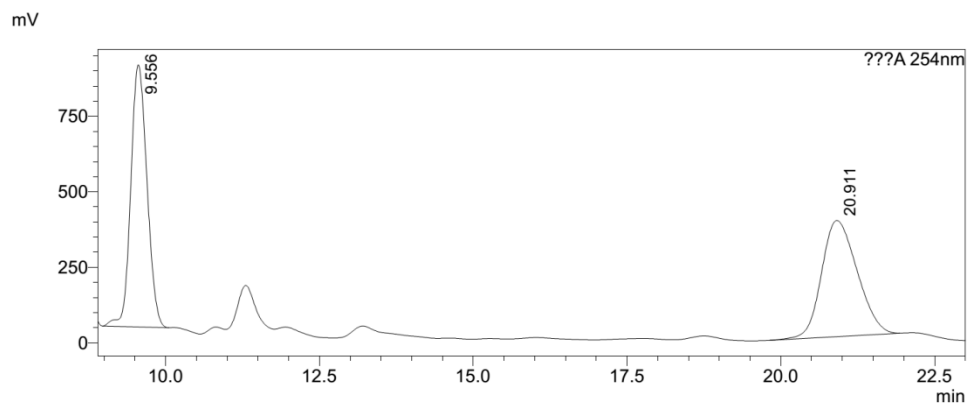

### <Peak Table>

???A 254nm

| Peak# | Ret. Time | Area     | Height  | Conc.  | Unit | Mark | Name |
|-------|-----------|----------|---------|--------|------|------|------|
| 1     | 9.556     | 15951277 | 868013  | 50.718 |      |      |      |
| 2     | 20.911    | 15499589 | 384946  | 49.282 |      |      |      |
| Total |           | 31450867 | 1252960 |        |      |      |      |

### <Chromatogram>

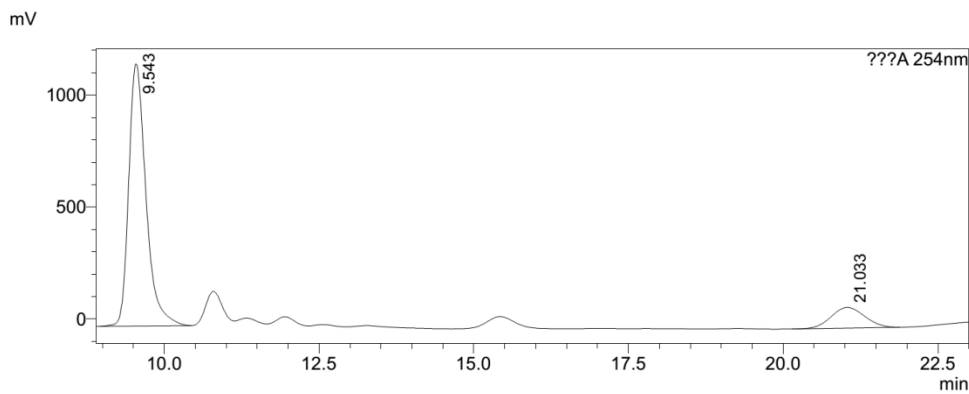

### <Peak Table>

???A 254nm

| Peak# | Ret. Time | Area     | Height  | Conc.  | Unit | Mark | Name |
|-------|-----------|----------|---------|--------|------|------|------|
| 1     | 9.543     | 22745042 | 1171281 | 86.682 |      |      |      |
| 2     | 21.033    | 3494455  | 92057   | 13.318 |      |      |      |
| Total |           | 26239497 | 1263338 |        |      |      |      |

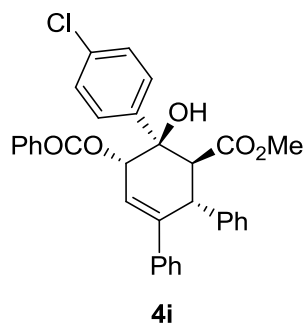

**<Chromatogram>**

mV

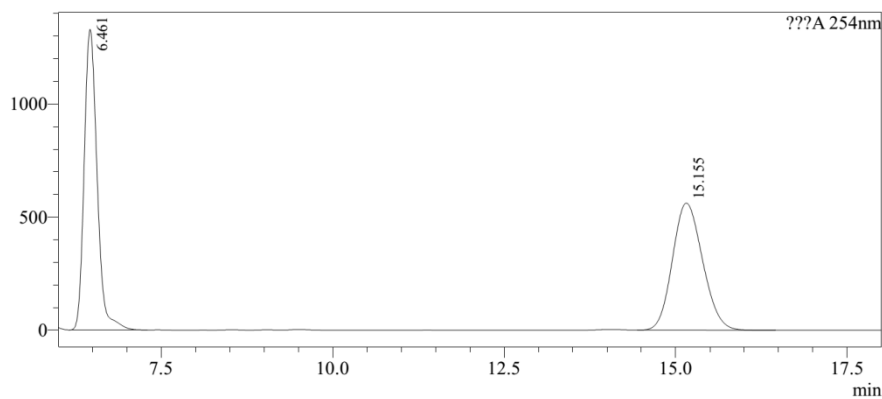

**<Peak Table>**

???A 254nm

| Peak# | Ret. Time | Area     | Height  | Conc.  | Unit | Mark | Name |
|-------|-----------|----------|---------|--------|------|------|------|
| 1     | 6.461     | 17357676 | 1329588 | 50.274 |      |      |      |
| 2     | 15.155    | 17168570 | 561866  | 49.726 |      |      |      |
| Total |           | 34526246 | 1891455 |        |      |      |      |

**<Chromatogram>**

mV

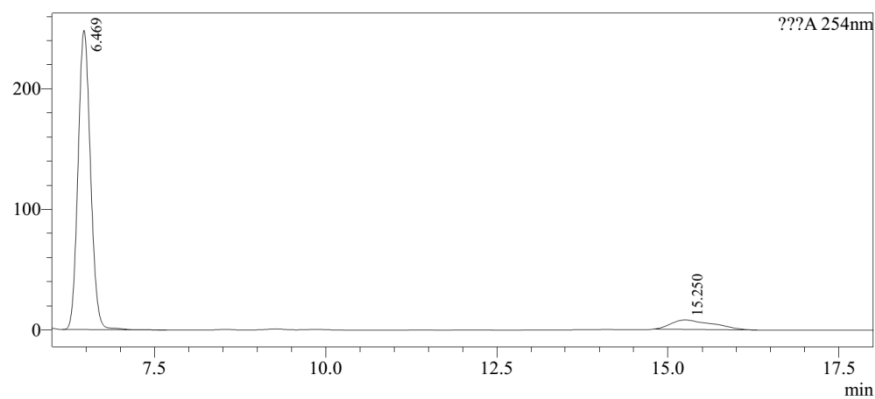

**<Peak Table>**

???A 254nm

| Peak# | Ret. Time | Area    | Height | Conc.  | Unit | Mark | Name |
|-------|-----------|---------|--------|--------|------|------|------|
| 1     | 6.469     | 3135973 | 248392 | 90.357 |      | S    |      |
| 2     | 15.250    | 334693  | 7903   | 9.643  |      | M    |      |
| Total |           | 3470666 | 256295 |        |      |      |      |

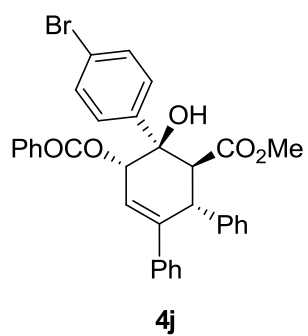

### <Chromatogram>

mV

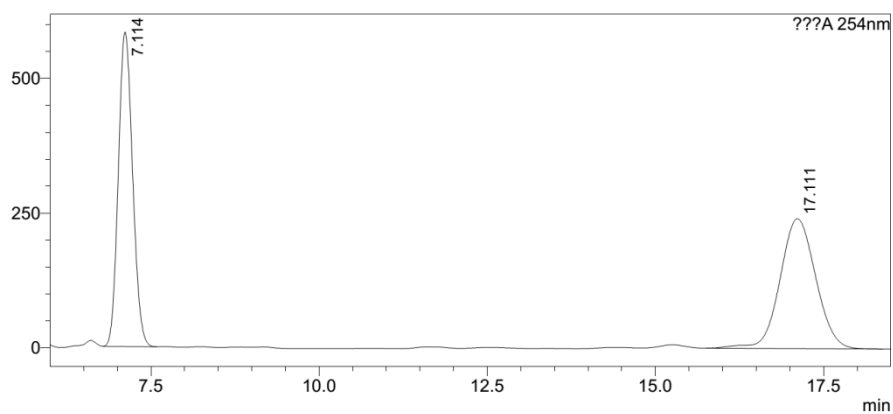

### <Peak Table>

??A 254nm

| Peak# | Ret. Time | Area     | Height | Conc.  | Unit | Mark | Name |
|-------|-----------|----------|--------|--------|------|------|------|
| 1     | 7.114     | 8620216  | 583471 | 49.154 |      |      |      |
| 2     | 17.111    | 8916880  | 241108 | 50.846 |      |      |      |
| Total |           | 17537096 | 824579 |        |      |      |      |

### <Chromatogram>

mV

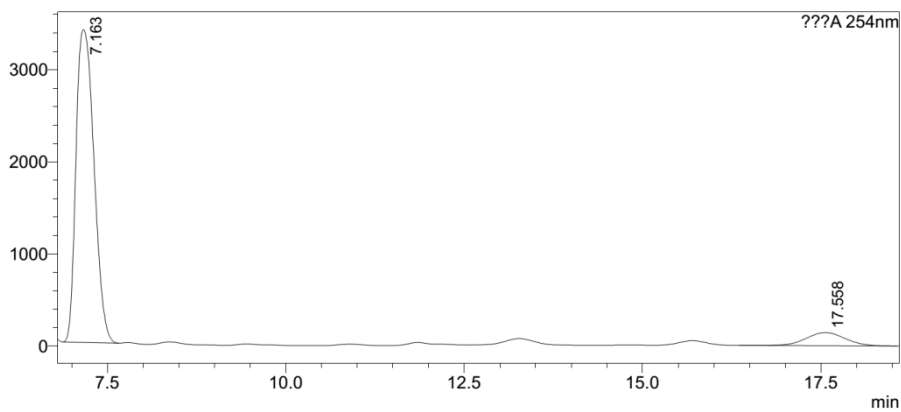

### <Peak Table>

??A 254nm

| Peak# | Ret. Time | Area     | Height  | Conc.  | Unit | Mark | Name |
|-------|-----------|----------|---------|--------|------|------|------|
| 1     | 7.163     | 59557686 | 3396172 | 91.648 |      |      |      |
| 2     | 17.558    | 5427227  | 142433  | 8.352  |      |      |      |
| Total |           | 64984913 | 3538606 |        |      |      |      |

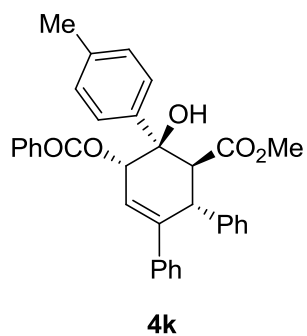

# <Chromatogram>

mV

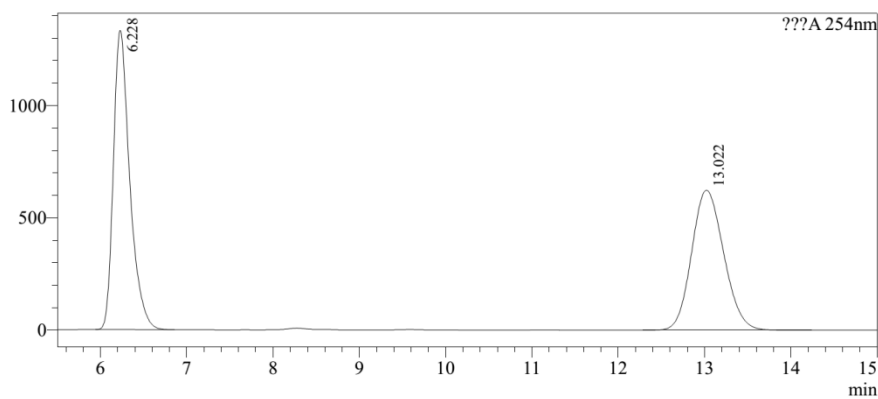

# <Peak Table>

???A 254nm

| Peak# | Ret. Time | Area     | Height  | Conc.  | Unit | Mark | Name |
|-------|-----------|----------|---------|--------|------|------|------|
| 1     | 6.228     | 17563599 | 1332319 | 52.167 |      |      |      |
| 2     | 13.022    | 16104164 | 622888  | 47.833 |      |      |      |
| Total |           | 33667763 | 1955207 |        |      |      |      |

# <Chromatogram>

mV

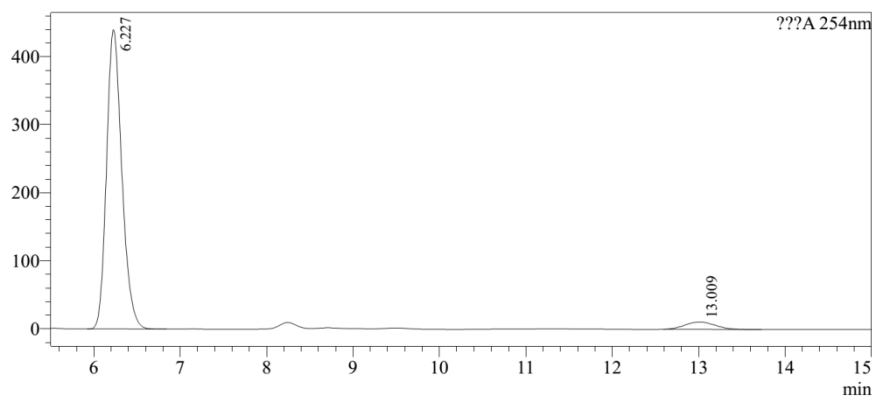

# <Peak Table>

???A 254nm

| Peak# | Ret. Time | Area    | Height | Conc.  | Unit | Mark | Name |
|-------|-----------|---------|--------|--------|------|------|------|
| 1     | 6.227     | 5418917 | 440136 | 95.353 |      |      |      |
| 2     | 13.009    | 264107  | 10839  | 4.647  |      | M    |      |
| Total |           | 5683023 | 450975 |        |      |      |      |

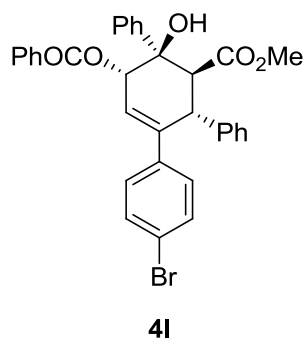

# <Chromatogram>

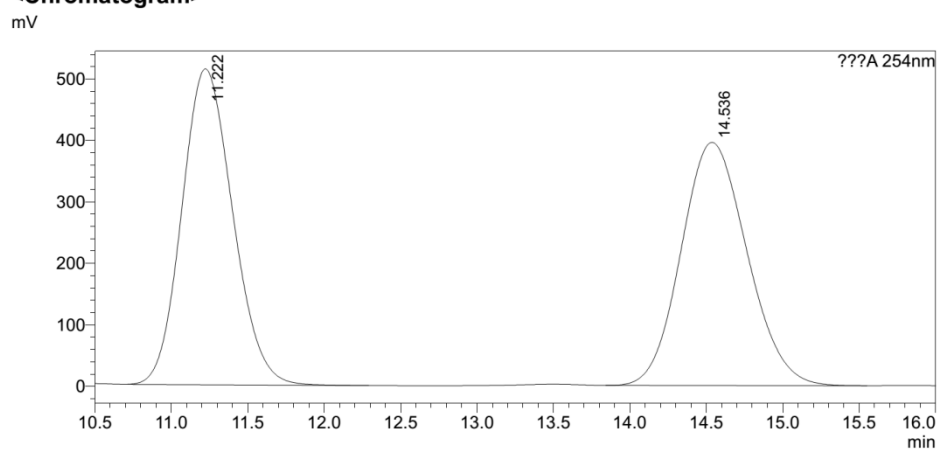

# <Peak Table>

??A 254nm

| Peak# | Ret. Time | Area     | Height | Conc.  | Unit | Mark | Name |
|-------|-----------|----------|--------|--------|------|------|------|
| 1     | 11.222    | 11897415 | 513582 | 50.098 |      |      |      |
| 2     | 14.536    | 11850704 | 395339 | 49.902 |      |      |      |
| Total |           | 23748119 | 908921 |        |      |      |      |

# <Chromatogram>

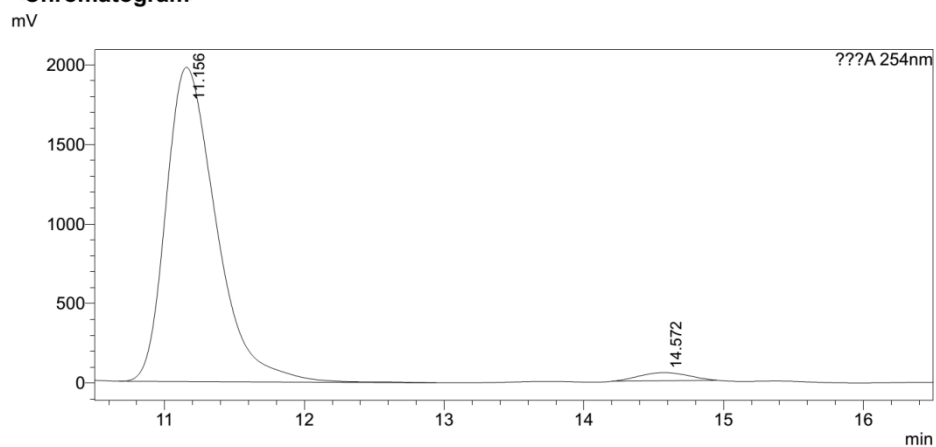

# <Peak Table>

??A 254nm

| Peak# | Ret. Time | Area     | Height  | Conc.  | Unit | Mark | Name |
|-------|-----------|----------|---------|--------|------|------|------|
| 1     | 11.156    | 49282819 | 1974784 | 97.508 |      |      |      |
| 2     | 14.572    | 1259504  | 51479   | 2.492  |      | M    |      |
| Total |           | 50542323 | 2026264 |        |      |      |      |

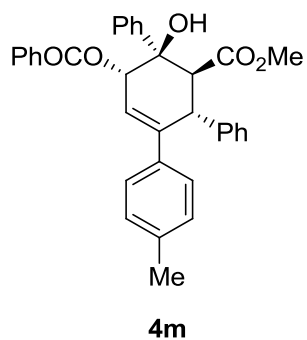

### <Chromatogram>

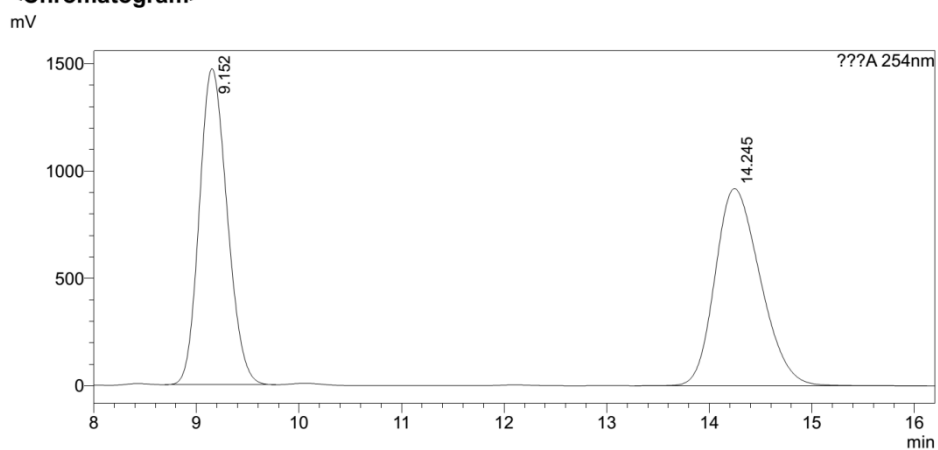

### <Peak Table>

??A 254nm

| Peak# | Ret. Time | Area     | Height  | Conc.  | Unit | Mark | Name |
|-------|-----------|----------|---------|--------|------|------|------|
| 1     | 9.152     | 27782848 | 1472000 | 49.659 |      |      |      |
| 2     | 14.245    | 28164597 | 917943  | 50.341 |      |      |      |
| Total |           | 55947445 | 2389943 |        |      |      |      |

### <Chromatogram>

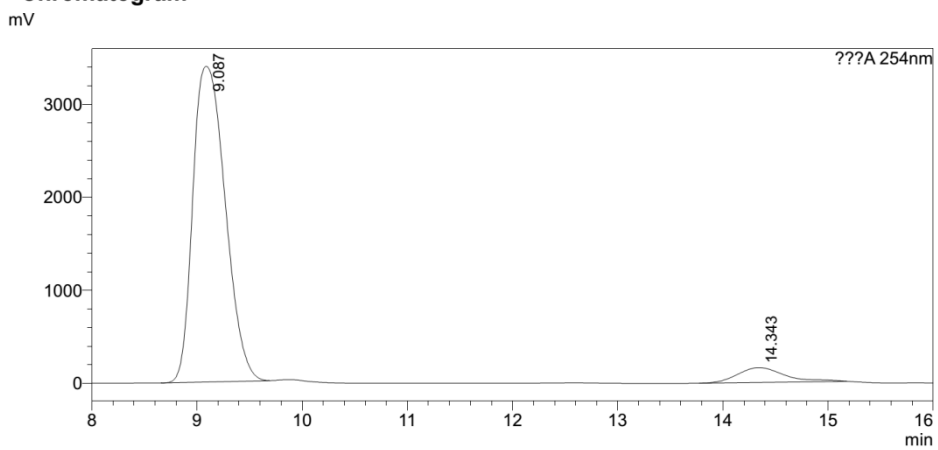

### <Peak Table>

??A 254nm

| Peak# | Ret. Time | Area     | Height  | Conc.  | Unit | Mark | Name |
|-------|-----------|----------|---------|--------|------|------|------|
| 1     | 9.087     | 72711251 | 3392496 | 93.602 |      |      |      |
| 2     | 14.343    | 4969691  | 159584  | 6.398  |      | M    |      |
| Total |           | 77680942 | 3552080 |        |      |      |      |

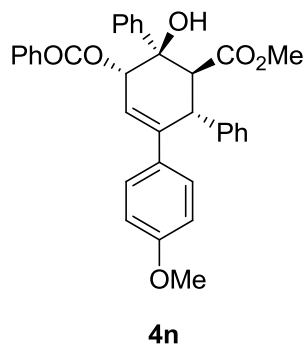

**<Chromatogram>**

mV

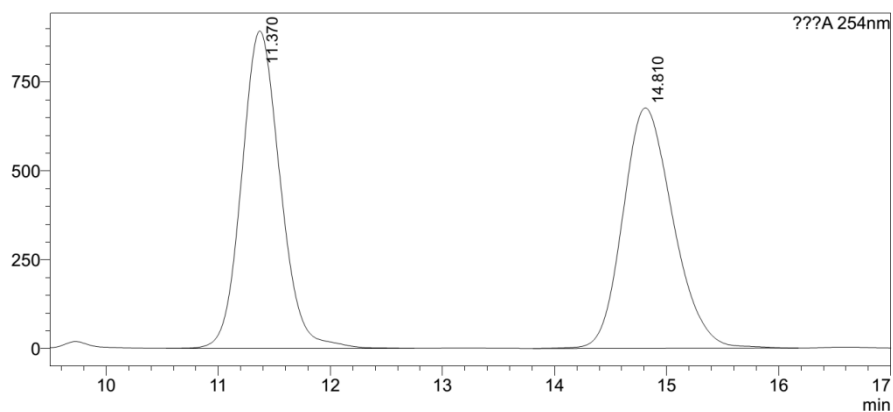

**<Peak Table>**

???A 254nm

| Peak# | Ret. Time | Area     | Height  | Conc.  | Unit | Mark | Name |
|-------|-----------|----------|---------|--------|------|------|------|
| 1     | 11.370    | 21344935 | 891660  | 50.295 |      |      |      |
| 2     | 14.810    | 21094669 | 675729  | 49.705 |      |      |      |
| Total |           | 42439604 | 1567389 |        |      |      |      |

**<Chromatogram>**

mV

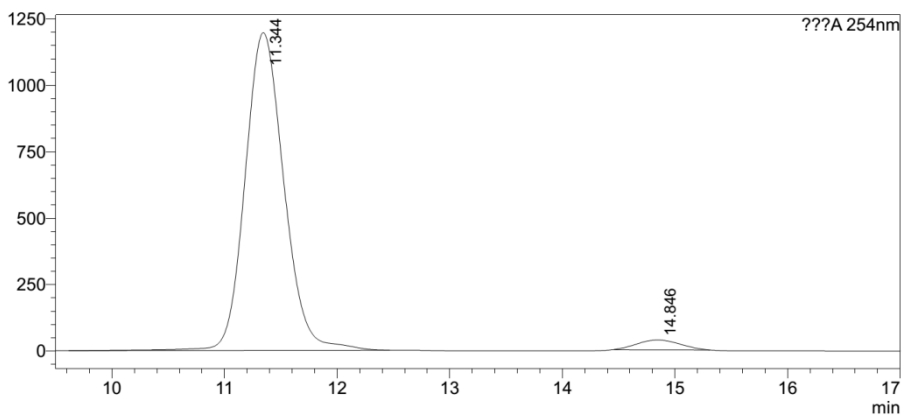

**<Peak Table>**

???A 254nm

| Peak# | Ret. Time | Area     | Height  | Conc.  | Unit | Mark | Name |
|-------|-----------|----------|---------|--------|------|------|------|
| 1     | 11.344    | 28715975 | 1196266 | 96.699 |      |      |      |
| 2     | 14.846    | 980303   | 37024   | 3.301  |      | M    |      |
| Total |           | 29696278 | 1233290 |        |      |      |      |

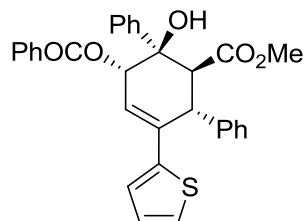

**4o**

# <Chromatogram>

mV

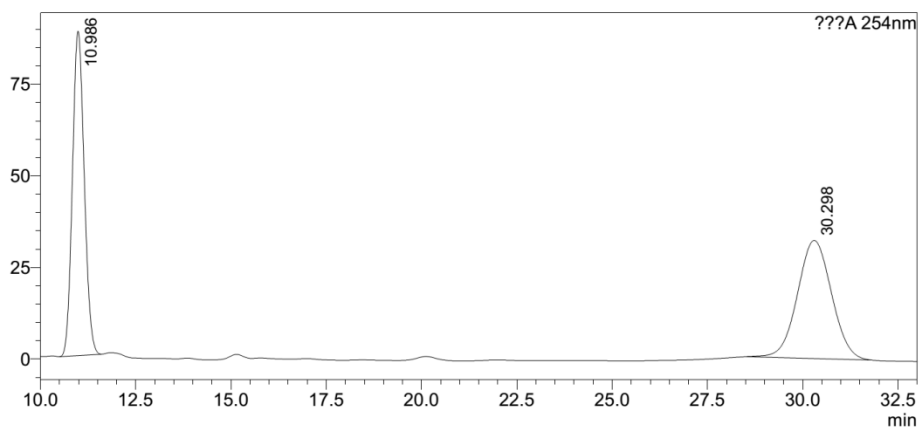

## <Peak Table>

???A 254nm

| Peak# | Ret. Time | Area    | Height | Conc.  | Unit | Mark | Name |
|-------|-----------|---------|--------|--------|------|------|------|
| 1     | 10.986    | 1908655 | 88516  | 48.791 |      |      |      |
| 2     | 30.298    | 2003215 | 32229  | 51.209 |      | M    |      |
| Total |           | 3911870 | 120744 |        |      |      |      |

# <Chromatogram>

mV

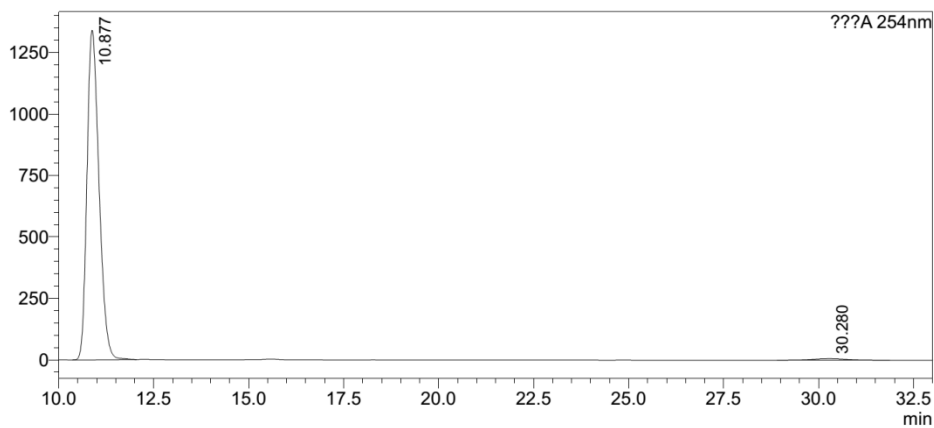

## <Peak Table>

???A 254nm

| Peak# | Ret. Time | Area     | Height  | Conc.  | Unit | Mark | Name |
|-------|-----------|----------|---------|--------|------|------|------|
| 1     | 10.877    | 29541931 | 1340365 | 98.749 |      |      |      |
| 2     | 30.280    | 374109   | 6141    | 1.251  |      |      |      |
| Total |           | 29916040 | 1346506 |        |      |      |      |

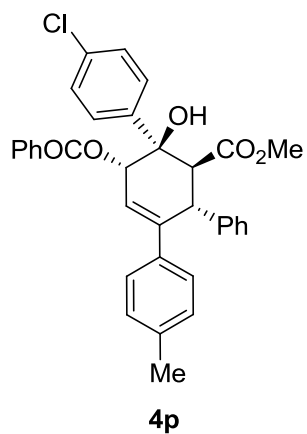

# <Chromatogram>

mV

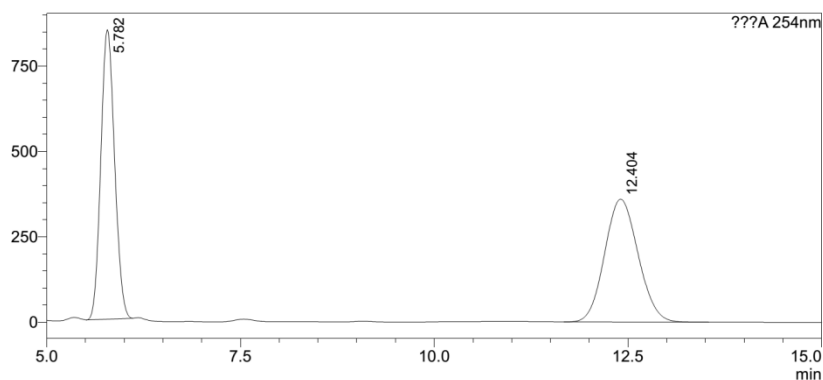

## <Peak Table>

???A 254nm

| Peak# | Ret. Time | Area     | Height  | Conc.  | Unit | Mark | Name |
|-------|-----------|----------|---------|--------|------|------|------|
| 1     | 5.782     | 10528318 | 848673  | 49.310 |      |      |      |
| 2     | 12.404    | 10823118 | 360126  | 50.690 |      |      |      |
| Total |           | 21351436 | 1208799 |        |      |      |      |

# <Chromatogram>

mV

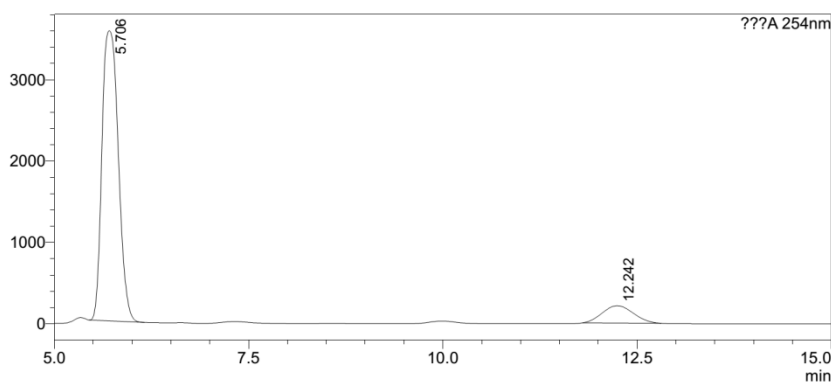

## <Peak Table>

???A 254nm

| Peak# | Ret. Time | Area     | Height  | Conc.  | Unit | Mark | Name |
|-------|-----------|----------|---------|--------|------|------|------|
| 1     | 5.706     | 52391727 | 3566833 | 89.877 |      |      |      |
| 2     | 12.242    | 5900900  | 212872  | 10.123 |      | M    |      |
| Total |           | 58292628 | 3779705 |        |      |      |      |

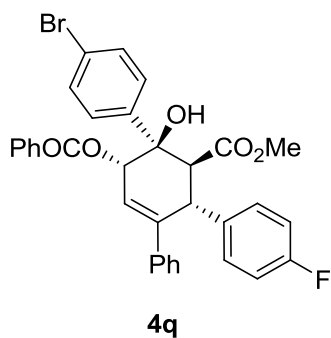

### <Chromatogram>

mV

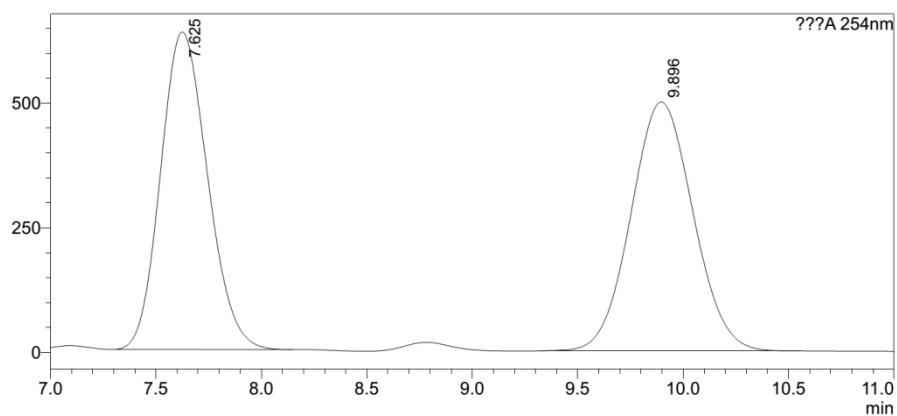

### <Peak Table>

???A 254nm

| Peak# | Ret. Time | Area     | Height  | Conc.  | Unit | Mark | Name |
|-------|-----------|----------|---------|--------|------|------|------|
| 1     | 7.625     | 9864701  | 636622  | 49.086 |      |      |      |
| 2     | 9.896     | 10231964 | 498819  | 50.914 |      | M    |      |
| Total |           | 20096665 | 1135441 |        |      |      |      |

### <Chromatogram>

mV

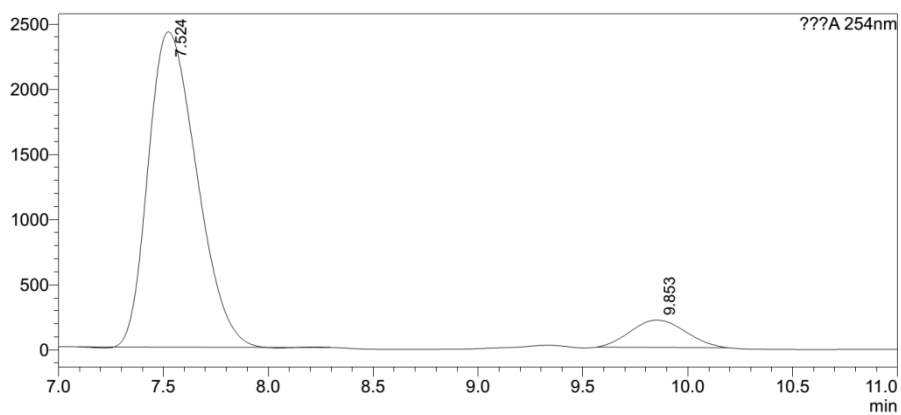

### <Peak Table>

???A 254nm

| Peak# | Ret. Time | Area     | Height  | Conc.  | Unit | Mark | Name |
|-------|-----------|----------|---------|--------|------|------|------|
| 1     | 7.524     | 38825233 | 2419481 | 91.069 |      | M    |      |
| 2     | 9.853     | 3807656  | 209493  | 8.931  |      | M    |      |
| Total |           | 42632889 | 2628974 |        |      |      |      |

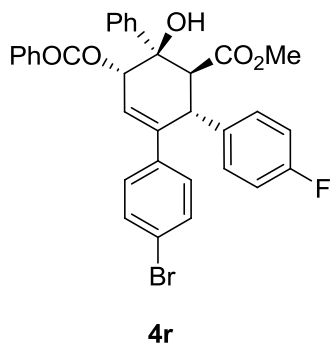

#### <Chromatogram>

mV

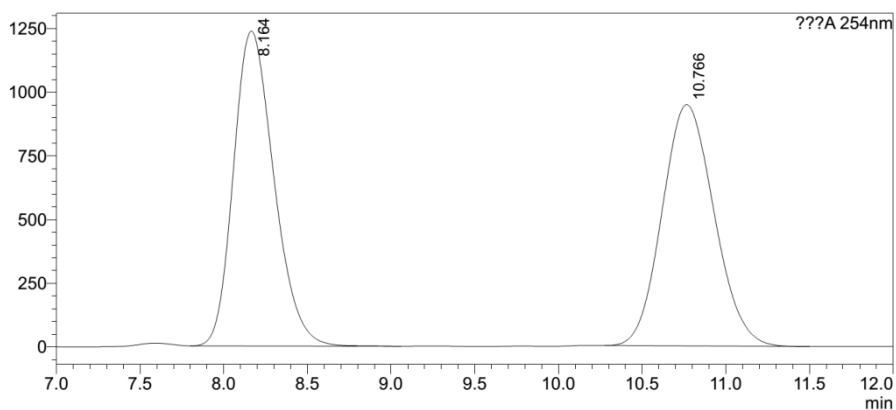

#### <Peak Table>

??A 254nm

| Peak# | Ret. Time | Area     | Height  | Conc.  | Unit | Mark | Name |
|-------|-----------|----------|---------|--------|------|------|------|
| 1     | 8.164     | 20768938 | 1236230 | 50.327 |      |      |      |
| 2     | 10.766    | 20498650 | 947504  | 49.673 |      |      |      |
| Total |           | 41267588 | 2183734 |        |      |      |      |

#### <Chromatogram>

mV

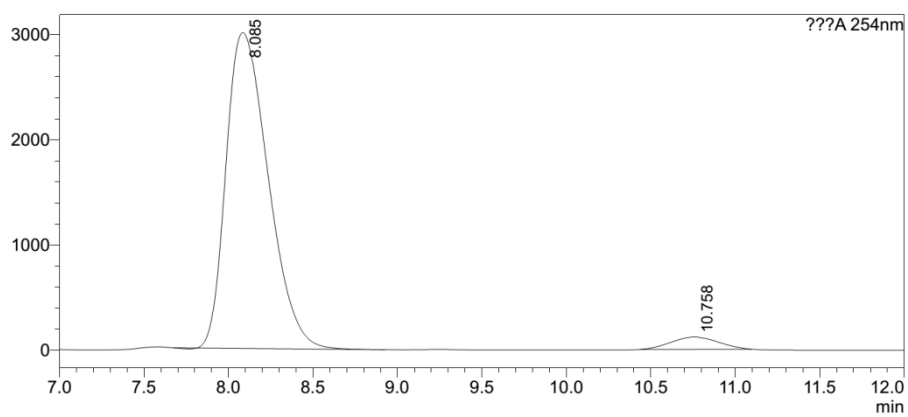

#### <Peak Table>

??A 254nm

| Peak# | Ret. Time | Area     | Height  | Conc.  | Unit | Mark | Name |
|-------|-----------|----------|---------|--------|------|------|------|
| 1     | 8.085     | 52184107 | 3002106 | 95.863 |      | M    |      |
| 2     | 10.758    | 2252036  | 115759  | 4.137  |      | M    |      |
| Total |           | 54436143 | 3117864 |        |      |      |      |

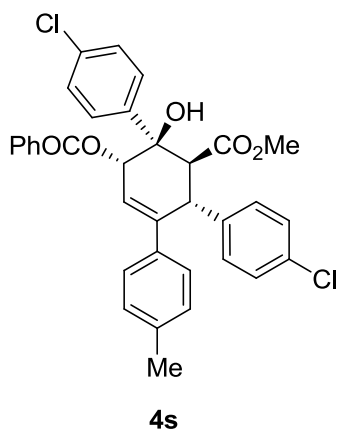

### <Chromatogram>

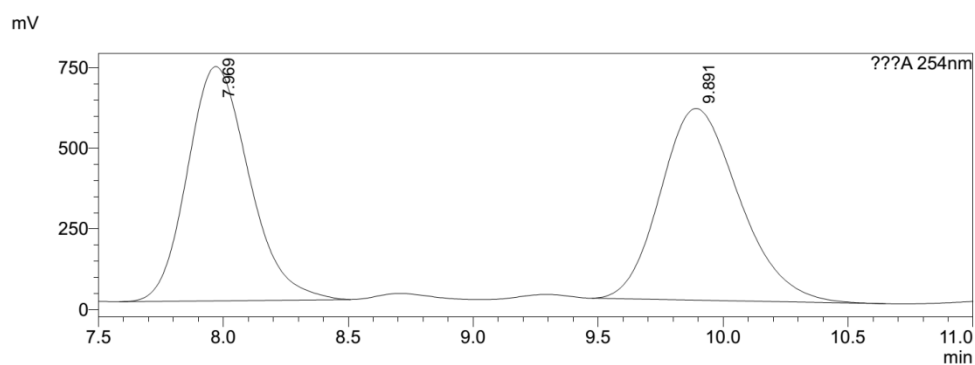

### <Peak Table>

??A 254nm

| Peak# | Ret. Time | Area     | Height  | Conc.  | Unit | Mark | Name |
|-------|-----------|----------|---------|--------|------|------|------|
| 1     | 7.969     | 12495109 | 726599  | 48.833 |      |      |      |
| 2     | 9.891     | 13092431 | 594627  | 51.167 |      |      |      |
| Total |           | 25587540 | 1321226 |        |      |      |      |

### <Chromatogram>

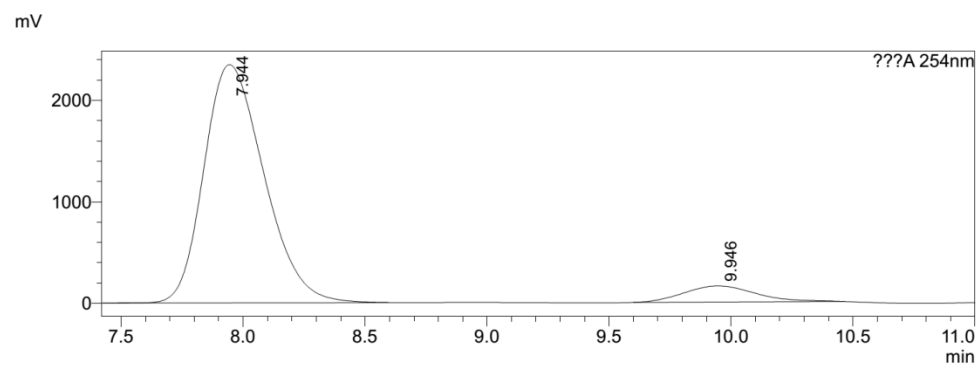

### <Peak Table>

??A 254nm

| Peak# | Ret. Time | Area     | Height  | Conc.  | Unit | Mark | Name |
|-------|-----------|----------|---------|--------|------|------|------|
| 1     | 7.944     | 40280865 | 2348087 | 92.502 |      |      |      |
| 2     | 9.946     | 3265300  | 158311  | 7.498  |      | M    |      |
| Total |           | 43546165 | 2506399 |        |      |      |      |

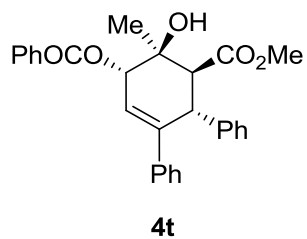

### <Chromatogram>

mV

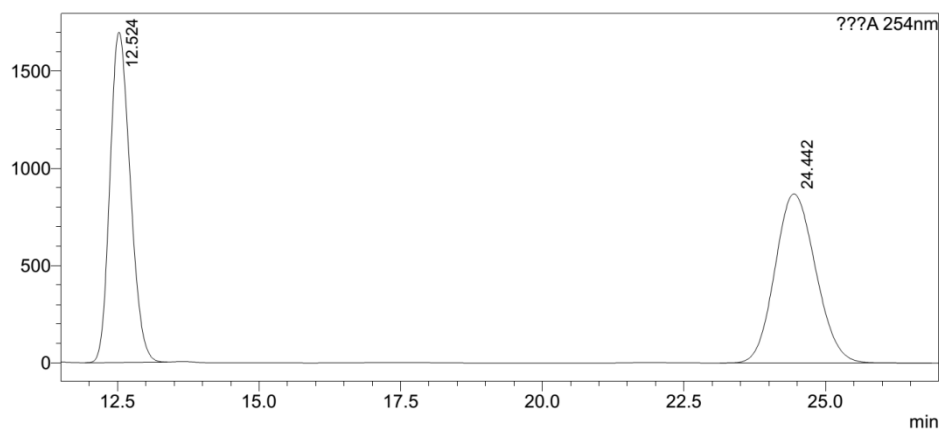

### <Peak Table>

???A 254nm

| Peak# | Ret. Time | Area     | Height  | Conc.  | Unit | Mark | Name |
|-------|-----------|----------|---------|--------|------|------|------|
| 1     | 12.524    | 42286392 | 1697968 | 49.325 |      |      |      |
| 2     | 24.442    | 43443330 | 869408  | 50.675 |      |      |      |
| Total |           | 85729722 | 2567377 |        |      |      |      |

### <Chromatogram>

mV

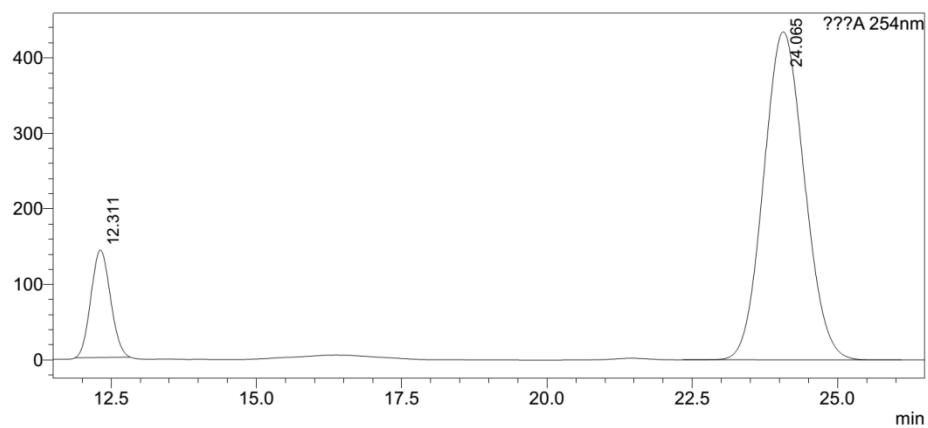

### <Peak Table>

???A 254nm

| Peak# | Ret. Time | Area     | Height | Conc.  | Unit | Mark | Name |
|-------|-----------|----------|--------|--------|------|------|------|
| 1     | 12.311    | 3318510  | 142326 | 13.508 |      | M    |      |
| 2     | 24.065    | 21248603 | 434423 | 86.492 |      | M    |      |
| Total |           | 24567113 | 576750 |        |      |      |      |

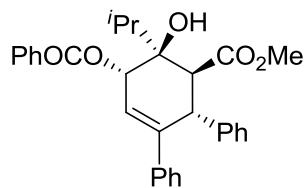

4u

# <Chromatogram>

mV

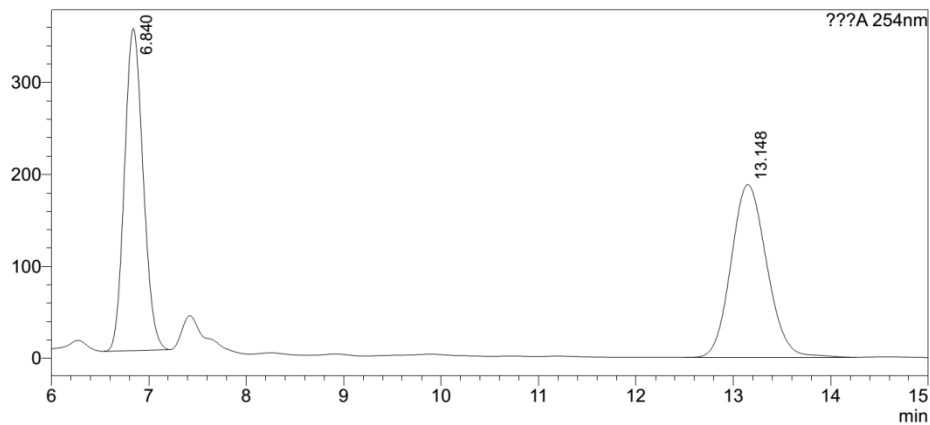

## <Peak Table>

???A 254nm

| Peak# | Ret. Time | Area    | Height | Conc.  | Unit | Mark | Name |
|-------|-----------|---------|--------|--------|------|------|------|
| 1     | 6.840     | 4680892 | 350647 | 49.409 |      |      |      |
| 2     | 13.148    | 4792929 | 188057 | 50.591 |      |      |      |
| Total |           | 9473822 | 538704 |        |      |      |      |

# <Chromatogram>

mV

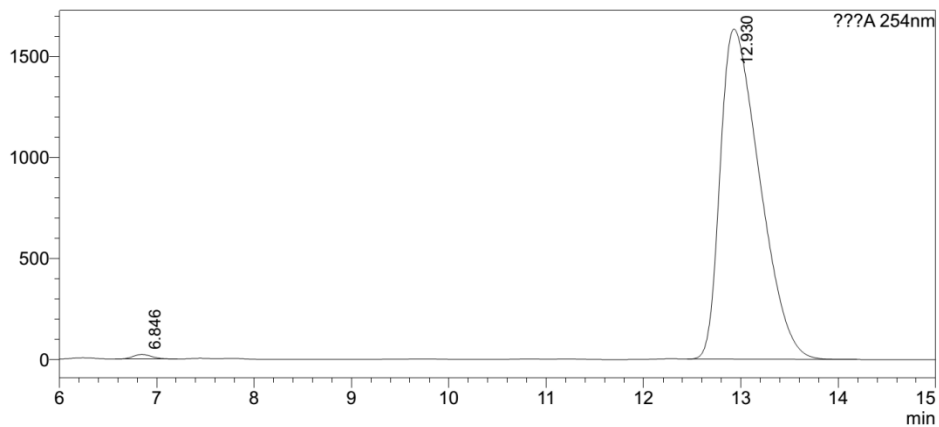

## <Peak Table>

???A 254nm

| Peak# | Ret. Time | Area     | Height  | Conc.  | Unit | Mark | Name |
|-------|-----------|----------|---------|--------|------|------|------|
| 1     | 6.846     | 301299   | 22396   | 0.650  |      |      |      |
| 2     | 12.930    | 46034411 | 1632546 | 99.350 |      |      |      |
| Total |           | 46335710 | 1654942 |        |      |      |      |

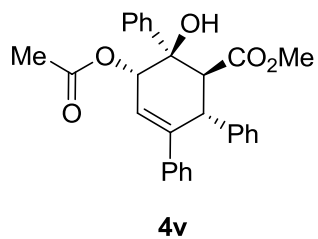

### <Chromatogram>

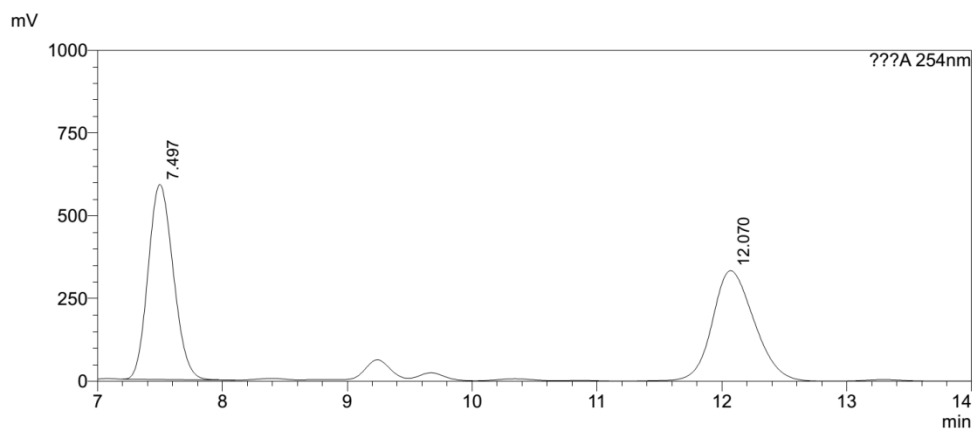

### <Peak Table>

??A 254nm

| Peak# | Ret. Time | Area     | Height | Conc.  | Unit | Mark | Name |
|-------|-----------|----------|--------|--------|------|------|------|
| 1     | 7.497     | 8270916  | 589150 | 51.452 |      |      |      |
| 2     | 12.070    | 7804101  | 333633 | 48.548 |      |      |      |
| Total |           | 16075017 | 922783 |        |      |      |      |

### <Chromatogram>

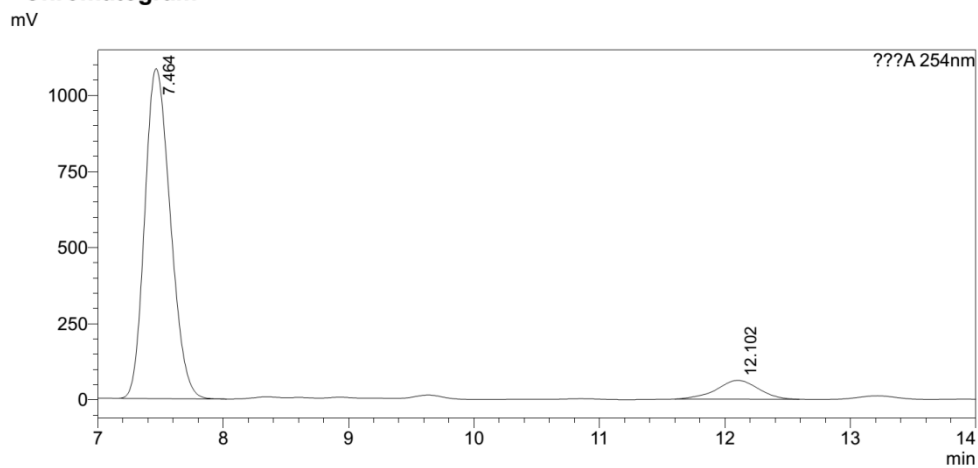

### <Peak Table>

??A 254nm

| Peak# | Ret. Time | Area     | Height  | Conc.  | Unit | Mark | Name |
|-------|-----------|----------|---------|--------|------|------|------|
| 1     | 7.464     | 15371473 | 1083728 | 91.423 |      |      |      |
| 2     | 12.102    | 1442175  | 61771   | 8.577  |      | M    |      |
| Total |           | 16813648 | 1145500 |        |      |      |      |

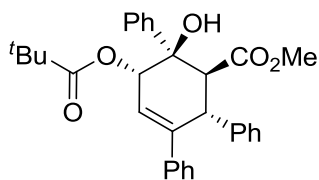

**4w**

**<Chromatogram>**

mV

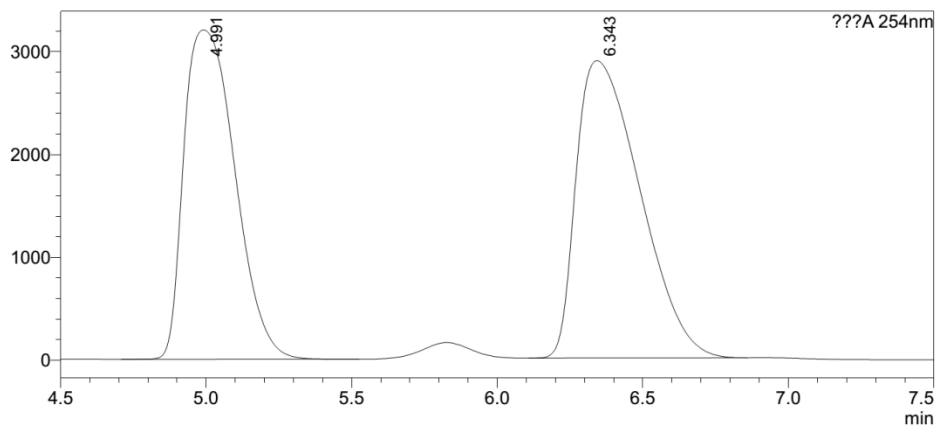

**<Peak Table>**

??A 254nm

| Peak# | Ret. Time | Area     | Height  | Conc.  | Unit | Mark | Name |
|-------|-----------|----------|---------|--------|------|------|------|
| 1     | 4.991     | 39172094 | 3205366 | 47.008 |      |      |      |
| 2     | 6.343     | 44159313 | 2894480 | 52.992 |      |      |      |
| Total |           | 83331406 | 6099846 |        |      |      |      |

**<Chromatogram>**

mV

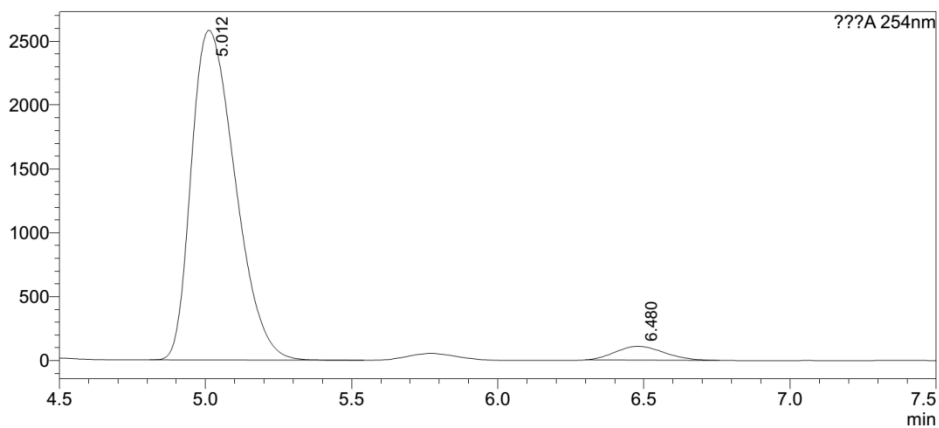

**<Peak Table>**

??A 254nm

| Peak# | Ret. Time | Area     | Height  | Conc.  | Unit | Mark | Name |
|-------|-----------|----------|---------|--------|------|------|------|
| 1     | 5.012     | 26948920 | 2579762 | 95.559 |      | V    |      |
| 2     | 6.480     | 1252428  | 108061  | 4.441  |      | M    |      |
| Total |           | 28201348 | 2687823 |        |      |      |      |

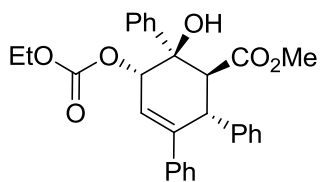

**4x**

**<Chromatogram>**

mV

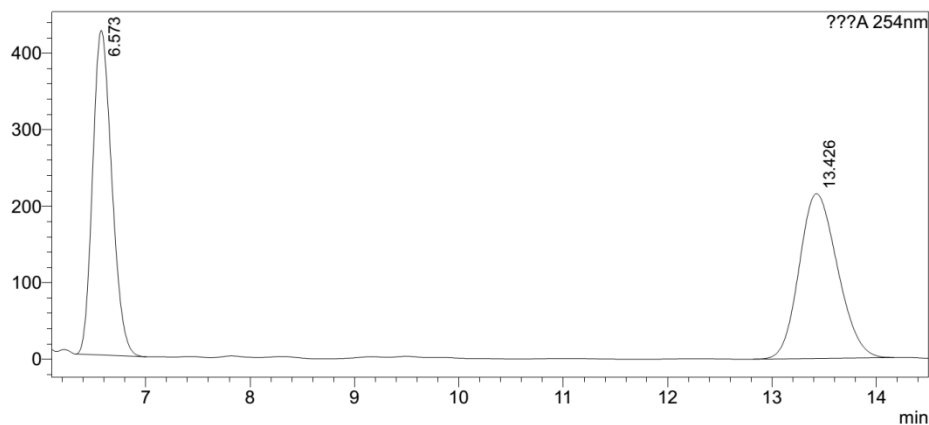

**<Peak Table>**

???A 254nm

| Peak# | Ret. Time | Area     | Height | Conc.  | Unit | Mark | Name |
|-------|-----------|----------|--------|--------|------|------|------|
| 1     | 6.573     | 5420582  | 424622 | 49.681 |      |      |      |
| 2     | 13.426    | 5490131  | 215263 | 50.319 |      |      |      |
| Total |           | 10910713 | 639885 |        |      |      |      |

**<Chromatogram>**

mV

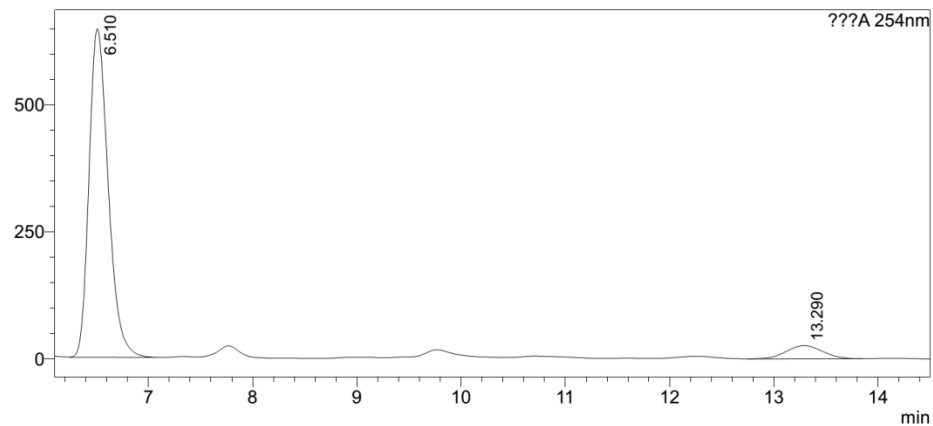

**<Peak Table>**

???A 254nm

| Peak# | Ret. Time | Area    | Height | Conc.  | Unit | Mark | Name |
|-------|-----------|---------|--------|--------|------|------|------|
| 1     | 6.510     | 8269243 | 646352 | 92.950 |      |      |      |
| 2     | 13.290    | 627161  | 25889  | 7.050  |      |      |      |
| Total |           | 8896404 | 672241 |        |      |      |      |

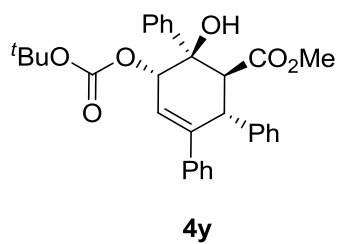

**<Chromatogram>**

mV

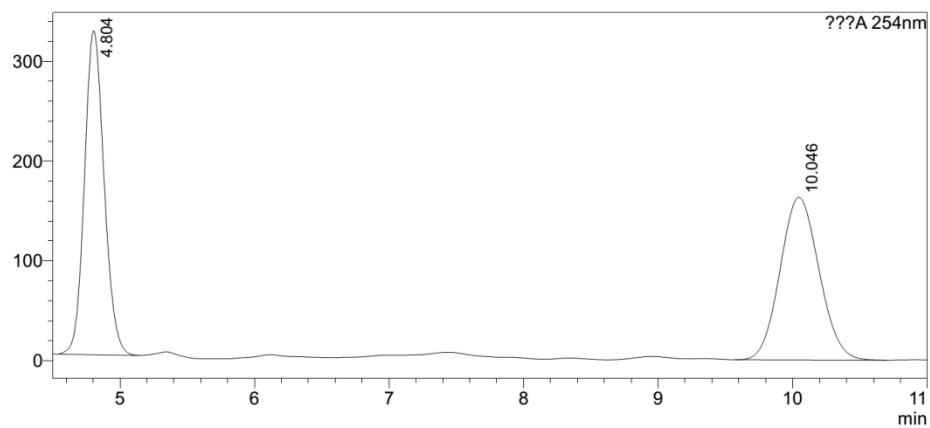

**<Peak Table>**

???A 254nm

| Peak# | Ret. Time | Area    | Height | Conc.  | Unit | Mark | Name |
|-------|-----------|---------|--------|--------|------|------|------|
| 1     | 4.804     | 3304418 | 324296 | 50.169 |      |      |      |
| 2     | 10.046    | 3282143 | 162860 | 49.831 |      |      |      |
| Total |           | 6586561 | 487156 |        |      |      |      |

**<Chromatogram>**

mV

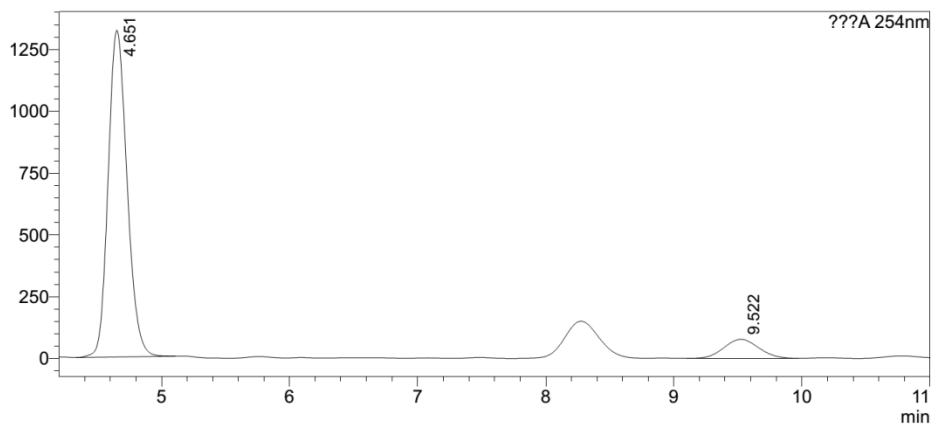

**<Peak Table>**

???A 254nm

| Peak# | Ret. Time | Area     | Height  | Conc.  | Unit | Mark | Name |
|-------|-----------|----------|---------|--------|------|------|------|
| 1     | 4.651     | 13591824 | 1322833 | 90.389 |      |      |      |
| 2     | 9.522     | 1445198  | 76653   | 9.611  |      |      |      |
| Total |           | 15037022 | 1399486 |        |      |      |      |

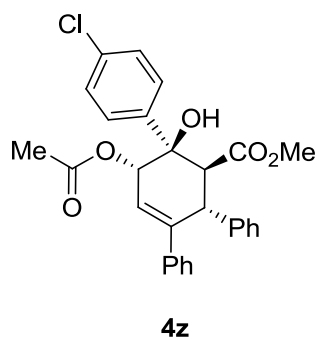

<Chromatogram>

mV

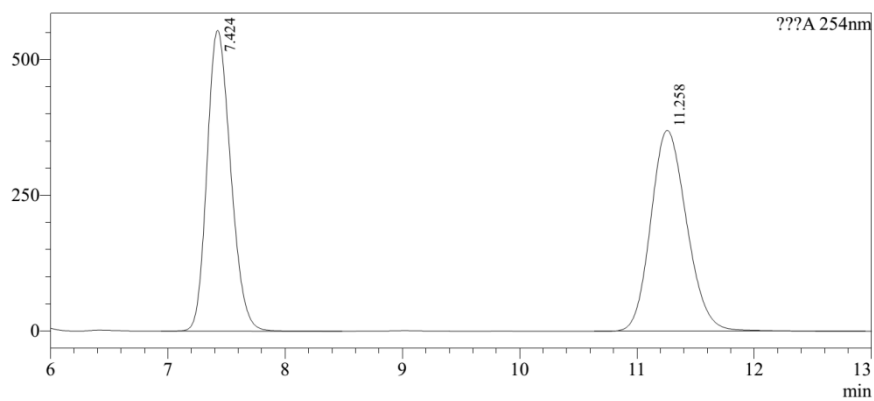

<Peak Table>

??A 254nm

| Peak# | Ret. Time | Area     | Height | Conc.  | Unit | Mark | Name |
|-------|-----------|----------|--------|--------|------|------|------|
| 1     | 7.424     | 7772533  | 555050 | 49.549 |      |      |      |
| 2     | 11.258    | 7914028  | 370551 | 50.451 |      |      |      |
| Total |           | 15686561 | 925600 |        |      |      |      |

<Chromatogram>

mV

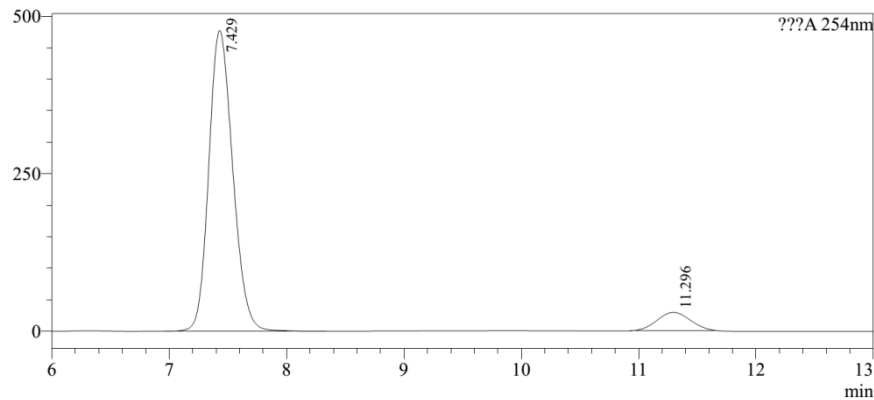

<Peak Table>

??A 254nm

| Peak# | Ret. Time | Area    | Height | Conc.  | Unit | Mark | Name |
|-------|-----------|---------|--------|--------|------|------|------|
| 1     | 7.429     | 6790164 | 477069 | 92.092 |      |      |      |
| 2     | 11.296    | 583041  | 29203  | 7.908  |      | M    |      |
| Total |           | 7373205 | 506273 |        |      |      |      |

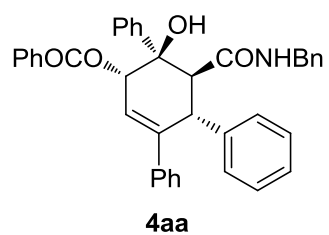

<Chromatogram>

mV

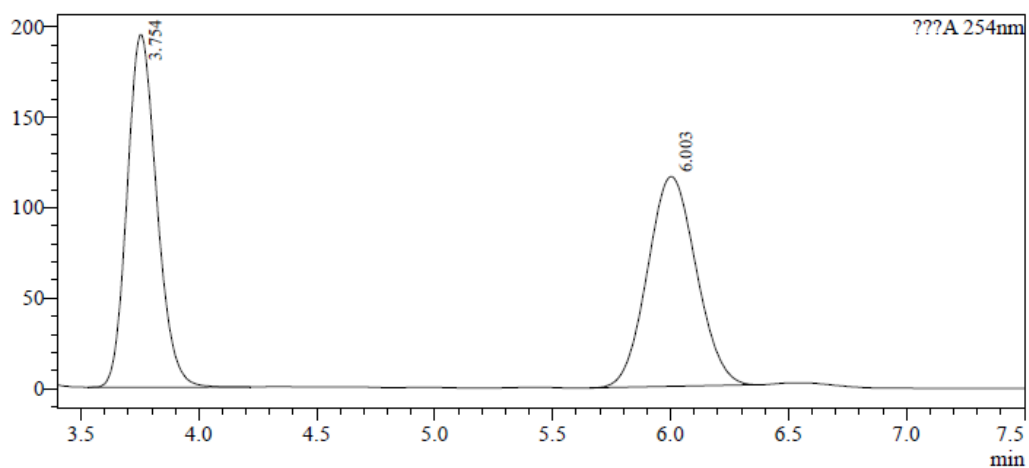

<Peak Table>

??A 254nm

| Peak# | Ret. Time | Area    | Height | Conc.  | Unit | Mark | Name |
|-------|-----------|---------|--------|--------|------|------|------|
| 1     | 3.754     | 1704254 | 194730 | 50.485 |      | S    |      |
| 2     | 6.003     | 1671540 | 115967 | 49.515 |      |      |      |
| Total |           | 3375793 | 310697 |        |      |      |      |

<Chromatogram>

mV

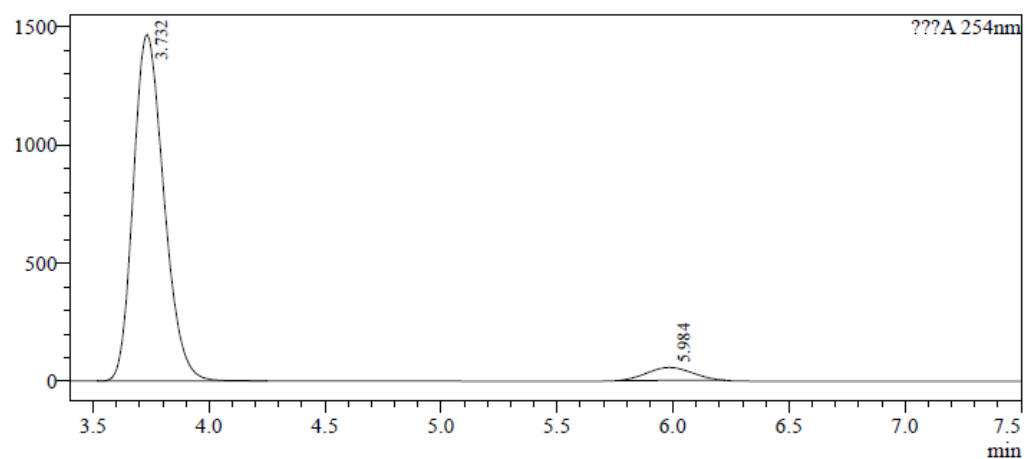

<Peak Table>

??A 254nm

| Peak# | Ret. Time | Area     | Height  | Conc.  | Unit | Mark | Name |
|-------|-----------|----------|---------|--------|------|------|------|
| 1     | 3.732     | 13446214 | 1465904 | 94.762 |      |      |      |
| 2     | 5.984     | 743257   | 54813   | 5.238  |      | M    |      |
| Total |           | 14189472 | 1520717 |        |      |      |      |

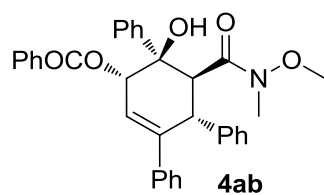

# <Chromatogram>

mV

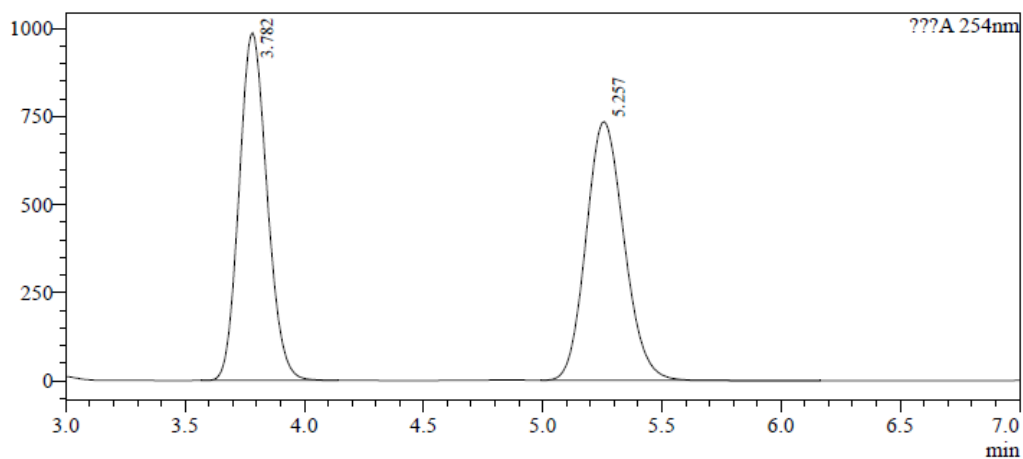

# <Peak Table>

???A 254nm

| Peak# | Ret. Time | Area     | Height  | Conc.  | Unit | Mark | Name |
|-------|-----------|----------|---------|--------|------|------|------|
| 1     | 3.782     | 8055804  | 986940  | 49.698 |      |      |      |
| 2     | 5.257     | 8153677  | 734602  | 50.302 |      | S    |      |
| Total |           | 16209481 | 1721542 |        |      |      |      |

# <Chromatogram>

mV

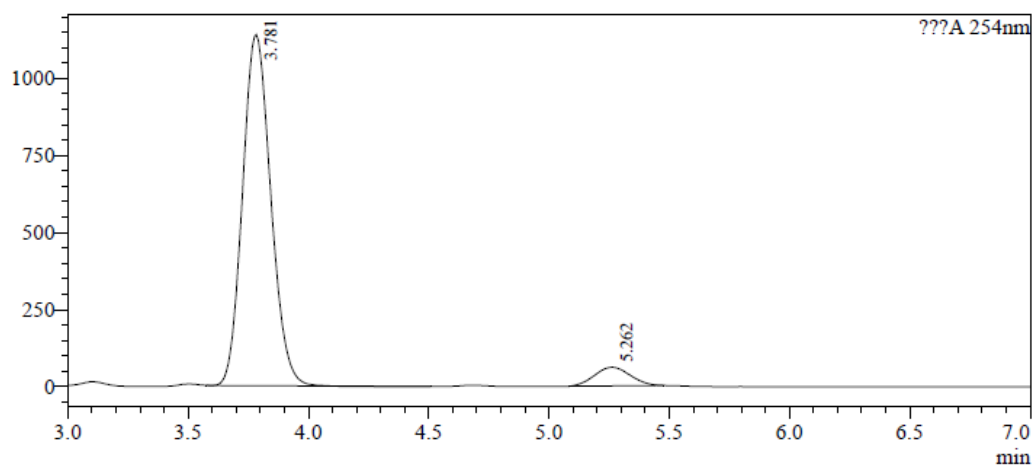

# <Peak Table>

???A 254nm

| Peak# | Ret. Time | Area    | Height  | Conc.  | Unit | Mark | Name |
|-------|-----------|---------|---------|--------|------|------|------|
| 1     | 3.781     | 9279434 | 1139138 | 93.748 |      | M    |      |
| 2     | 5.262     | 618842  | 60227   | 6.252  |      | M    |      |
| Total |           | 9898275 | 1199366 |        |      |      |      |

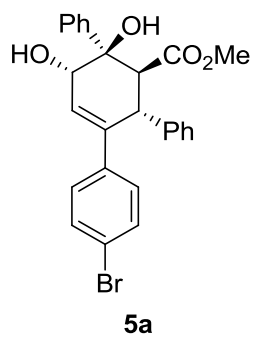

<Chromatogram>

mV

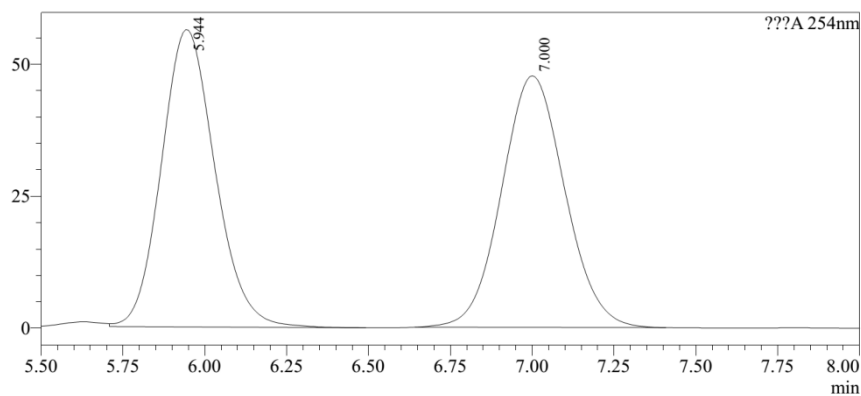

<Peak Table>

??A 254nm

| Peak# | Ret. Time | Area    | Height | Conc.  | Unit | Mark | Name |
|-------|-----------|---------|--------|--------|------|------|------|
| 1     | 5.944     | 642326  | 56339  | 50.052 |      | M    |      |
| 2     | 7.000     | 640985  | 47676  | 49.948 |      | M    |      |
| Total |           | 1283311 | 104014 |        |      |      |      |

<Chromatogram>

mV

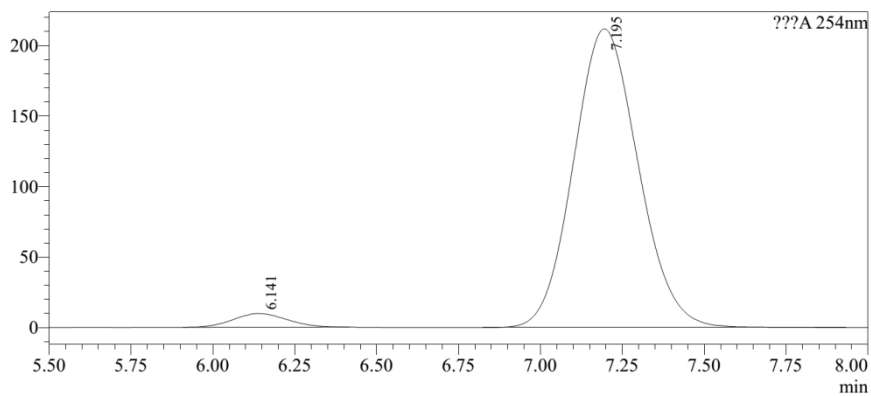

<Peak Table>

??A 254nm

| Peak# | Ret. Time | Area    | Height | Conc.  | Unit | Mark | Name |
|-------|-----------|---------|--------|--------|------|------|------|
| 1     | 6.141     | 109450  | 9680   | 3.620  |      | M    |      |
| 2     | 7.195     | 2914409 | 211898 | 96.380 |      | M    |      |
| Total |           | 3023858 | 221578 |        |      |      |      |

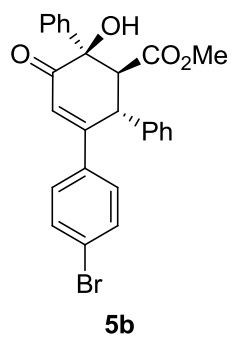

**<Chromatogram>**

mV

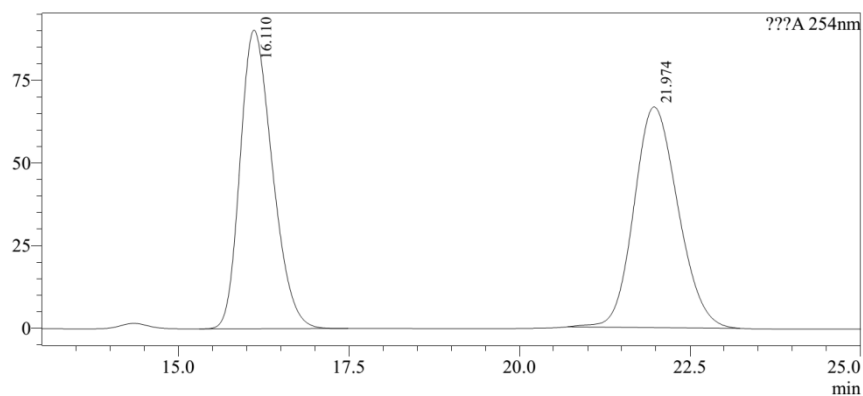

**<Peak Table>**

??A 254nm

| Peak# | Ret. Time | Area    | Height | Conc.  | Unit | Mark | Name |
|-------|-----------|---------|--------|--------|------|------|------|
| 1     | 16.110    | 2976889 | 90334  | 49.828 |      |      |      |
| 2     | 21.974    | 2997443 | 66742  | 50.172 |      | M    |      |
| Total |           | 5974331 | 157075 |        |      |      |      |

**<Chromatogram>**

mV

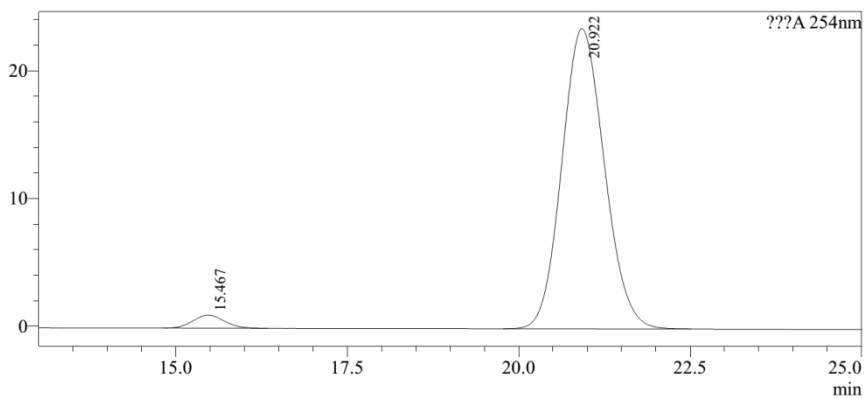

**<Peak Table>**

??A 254nm

| Peak# | Ret. Time | Area    | Height | Conc.  | Unit | Mark | Name |
|-------|-----------|---------|--------|--------|------|------|------|
| 1     | 15.467    | 32456   | 1019   | 3.103  |      |      |      |
| 2     | 20.922    | 1013503 | 23507  | 96.897 |      |      |      |
| Total |           | 1045959 | 24526  |        |      |      |      |

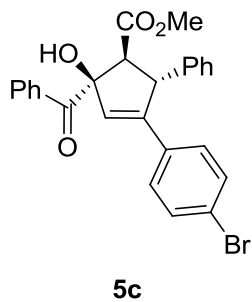

**<Chromatogram>**

mV

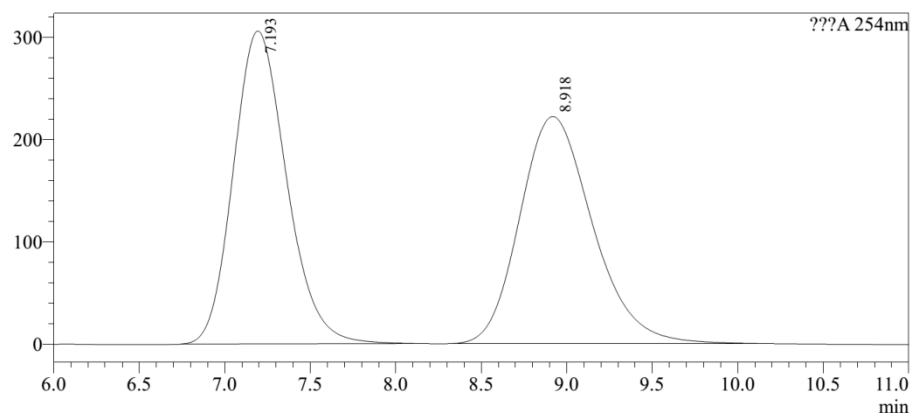

**<Peak Table>**

??A 254nm

| Peak# | Ret. Time | Area     | Height | Conc.  | Unit | Mark | Name |
|-------|-----------|----------|--------|--------|------|------|------|
| 1     | 7.193     | 6618941  | 306083 | 50.190 |      | M    |      |
| 2     | 8.918     | 6568872  | 222042 | 49.810 |      | M    |      |
| Total |           | 13187813 | 528125 |        |      |      |      |

**<Chromatogram>**

mV

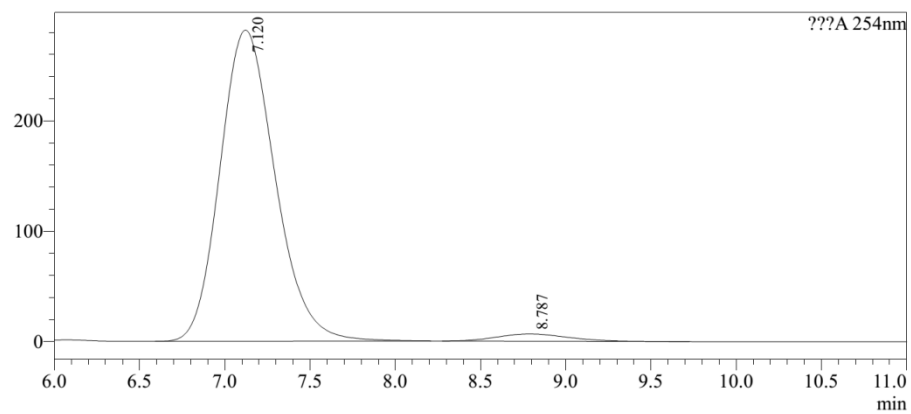

**<Peak Table>**

??A 254nm

| Peak# | Ret. Time | Area    | Height | Conc.  | Unit | Mark | Name |
|-------|-----------|---------|--------|--------|------|------|------|
| 1     | 7.120     | 6342553 | 281556 | 97.086 |      | M    |      |
| 2     | 8.787     | 190384  | 6496   | 2.914  |      | M    |      |
| Total |           | 6532938 | 288052 |        |      |      |      |

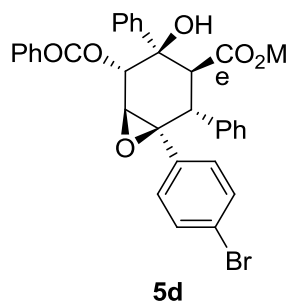

# <Chromatogram>

mV

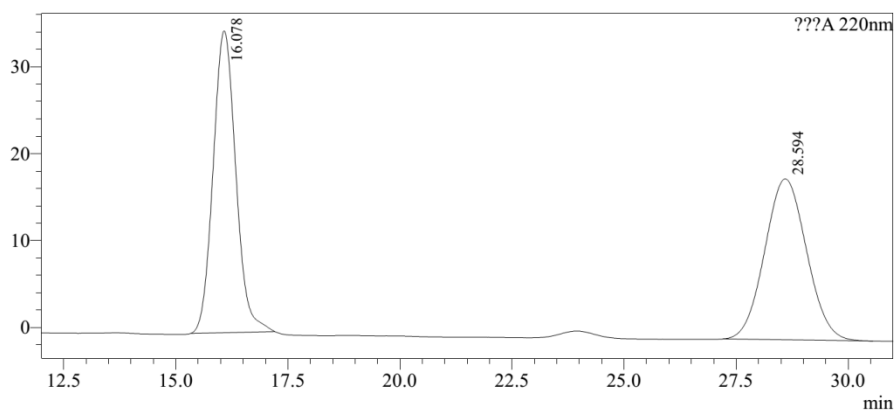

# <Peak Table>

???A 220nm

| Peak# | Ret. Time | Area    | Height | Conc.  | Unit | Mark | Name |
|-------|-----------|---------|--------|--------|------|------|------|
| 1     | 16.078    | 1223907 | 34739  | 50.446 |      | M    |      |
| 2     | 28.594    | 1202268 | 18527  | 49.554 |      | M    |      |
| Total |           | 2426176 | 53266  |        |      |      |      |

# <Chromatogram>

mV

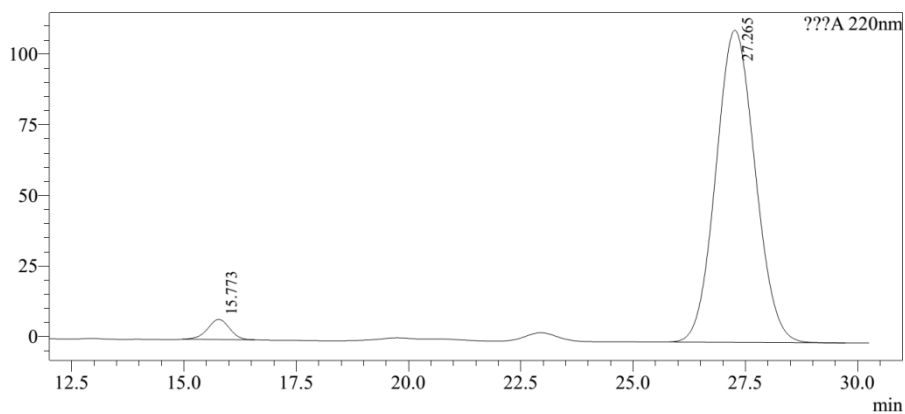

# <Peak Table>

???A 220nm

| Peak# | Ret. Time | Area    | Height | Conc.  | Unit | Mark | Name |
|-------|-----------|---------|--------|--------|------|------|------|
| 1     | 15.773    | 242982  | 7133   | 3.490  |      | M    |      |
| 2     | 27.265    | 6718930 | 110503 | 96.510 |      | M    |      |
| Total |           | 6961912 | 117635 |        |      |      |      |

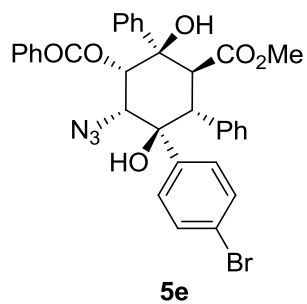

**<Chromatogram>**

mV

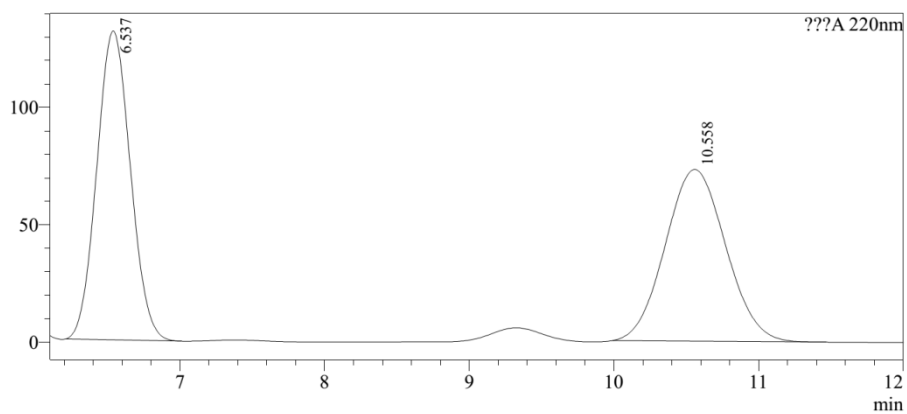

**<Peak Table>**

??A 220nm

| Peak# | Ret. Time | Area    | Height | Conc.  | Unit | Mark | Name |
|-------|-----------|---------|--------|--------|------|------|------|
| 1     | 6.537     | 2128445 | 131579 | 50.052 |      | M    |      |
| 2     | 10.558    | 2124041 | 73110  | 49.948 |      | M    |      |
| Total |           | 4252486 | 204689 |        |      |      |      |

**<Chromatogram>**

mV

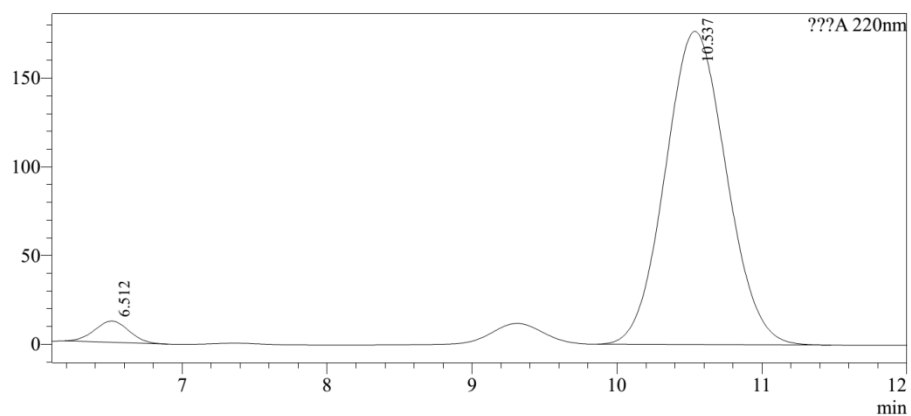

**<Peak Table>**

??A 220nm

| Peak# | Ret. Time | Area    | Height | Conc.  | Unit | Mark | Name |
|-------|-----------|---------|--------|--------|------|------|------|
| 1     | 6.512     | 198948  | 11985  | 3.707  |      | M    |      |
| 2     | 10.537    | 5168416 | 176486 | 96.293 |      | M    |      |
| Total |           | 5367365 | 188470 |        |      |      |      |

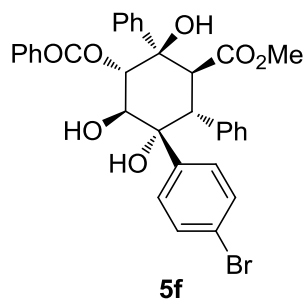

**<Chromatogram>**

mV

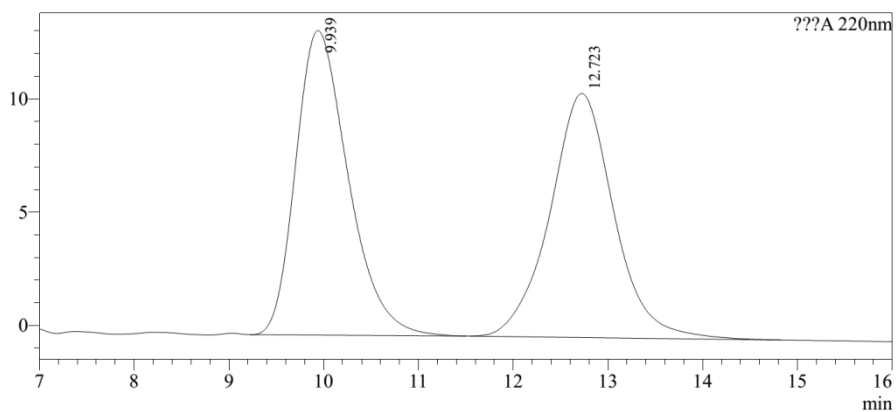

**<Peak Table>**

??A 220nm

| Peak# | Ret. Time | Area    | Height | Conc.  | Unit | Mark | Name |
|-------|-----------|---------|--------|--------|------|------|------|
| 1     | 9.939     | 517713  | 13445  | 50.588 |      |      |      |
| 2     | 12.723    | 505681  | 10771  | 49.412 |      |      |      |
| Total |           | 1023394 | 24216  |        |      |      |      |

**<Chromatogram>**

mV

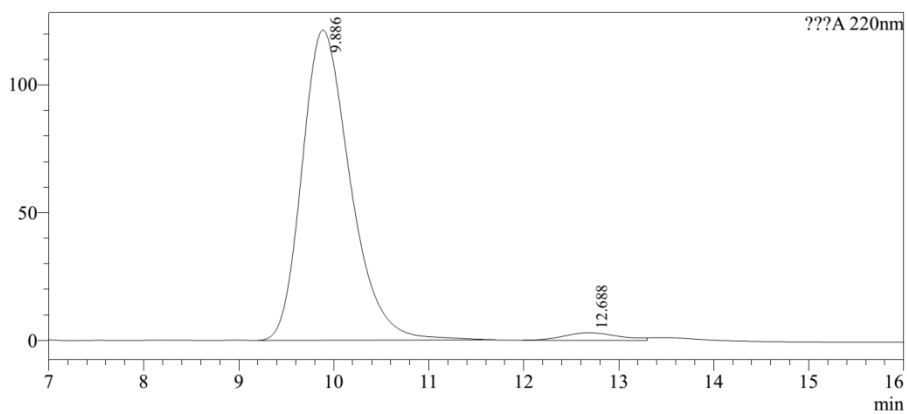

**<Peak Table>**

??A 220nm

| Peak# | Ret. Time | Area    | Height | Conc.  | Unit | Mark | Name |
|-------|-----------|---------|--------|--------|------|------|------|
| 1     | 9.886     | 4278927 | 121274 | 97.188 |      | M    |      |
| 2     | 12.688    | 123812  | 3044   | 2.812  |      | M    |      |
| Total |           | 4402739 | 124319 |        |      |      |      |
